# Supplementary material for: Mechanistic basis of post-treatment control of SIV after anti-α4β7 antibody therapy
Source: PubMed Central journal article supplement (PMC8189501; doi:10.1371/journal.pcbi.1009031), 2021-06-09

# S3 Text. Profile likelihood and sensitivity of model fit to assumed parameters

In the profile likelihood plots, the red dot indicates the maximum likelihood estimate, the black dots are the best binned output from the global optimization process, the black line shows the continuous approximation to the profile likelihood, and the blue dashed line indicates the threshold value for the confidence interval (the maximum log-likelihood value plus half the 95% percentile for the  $\chi^2$  distribution for  $k$  degrees of freedom; S1 Text). In the sensitivity analysis plots, the red dot indicates the maximum likelihood estimate for the baseline value (Table 1), the black line shows the log-likelihood for the alternative parameter value, and the blue dashed line (the maximum log-likelihood value plus half the 95% percentile for the  $\chi^2$  distribution for one degree of freedom) is an indicator of when the quality of the fit becomes significantly worse.

## Contents

|                                                                  |           |
|------------------------------------------------------------------|-----------|
| <b>1 Likelihood profiles: Control macaques</b>                   | <b>3</b>  |
| 1.1 Baseline effector cell source model . . . . .                | 3         |
| 1.2 Saturated effector cell source model . . . . .               | 7         |
| 1.3 Antigen presenting cell effector cell source model . . . . . | 14        |
| <b>2 Sensitivity analysis: Control macaques</b>                  | <b>18</b> |
| 2.1 Baseline effector cell source model . . . . .                | 18        |
| 2.2 Saturated effector cell source model . . . . .               | 22        |
| 2.3 Antigen presenting cell effector cell source model . . . . . | 26        |
| <b>3 Likelihood profiles: Increased viral clearance</b>          | <b>30</b> |
| 3.1 Baseline effector cell source model . . . . .                | 30        |
| 3.2 Saturated effector cell source model . . . . .               | 35        |
| 3.3 Antigen presenting cell effector cell source model . . . . . | 40        |
| <b>4 Sensitivity analysis: Increased viral clearance</b>         | <b>45</b> |
| 4.1 Baseline effector cell source model . . . . .                | 45        |
| 4.2 Saturated effector cell source model . . . . .               | 50        |
| 4.3 Antigen presenting cell effector cell source model . . . . . | 55        |
| <b>5 Likelihood profiles: Viral neutralization</b>               | <b>60</b> |
| 5.1 Baseline effector cell source model . . . . .                | 60        |
| 5.2 Saturated effector cell source model . . . . .               | 65        |
| 5.3 Antigen presenting cell effector cell source model . . . . . | 70        |

|           |                                                                                            |            |
|-----------|--------------------------------------------------------------------------------------------|------------|
| <b>6</b>  | <b>Sensitivity analysis: Viral neutralization</b>                                          | <b>75</b>  |
| 6.1       | Baseline effector cell source model . . . . .                                              | 75         |
| 6.2       | Saturated effector cell source model . . . . .                                             | 80         |
| 6.3       | Antigen presenting cell effector cell source model . . . . .                               | 85         |
| <b>7</b>  | <b>Likelihood profiles: Protection</b>                                                     | <b>90</b>  |
| 7.1       | Baseline effector cell source model . . . . .                                              | 90         |
| 7.2       | Saturated effector cell source model . . . . .                                             | 95         |
| 7.3       | Antigen presenting cell effector cell source model . . . . .                               | 100        |
| <b>8</b>  | <b>Sensitivity analysis: Protection</b>                                                    | <b>105</b> |
| 8.1       | Baseline effector cell source model . . . . .                                              | 105        |
| 8.2       | Saturated effector cell source model . . . . .                                             | 110        |
| 8.3       | Antigen presenting cell effector cell source model . . . . .                               | 115        |
| <b>9</b>  | <b>Likelihood profiles: Increased antigen presentation</b>                                 | <b>120</b> |
| 9.1       | Baseline effector cell source model . . . . .                                              | 120        |
| 9.2       | Saturated effector cell source model . . . . .                                             | 124        |
| 9.3       | Antigen presenting cell effector cell source model . . . . .                               | 129        |
| <b>10</b> | <b>Sensitivity analysis: Increased antigen presentation</b>                                | <b>134</b> |
| 10.1      | Baseline effector cell source model . . . . .                                              | 134        |
| 10.2      | Saturated effector cell source model . . . . .                                             | 139        |
| 10.3      | Antigen presenting cell effector cell source model . . . . .                               | 144        |
| <b>11</b> | <b>Likelihood profiles: Increased antigen presentation with increased viral clearance</b>  | <b>149</b> |
| 11.1      | Baseline effector cell source model . . . . .                                              | 149        |
| 11.2      | Saturated effector cell source model . . . . .                                             | 154        |
| 11.3      | Antigen presenting cell effector cell source model . . . . .                               | 159        |
| <b>12</b> | <b>Sensitivity analysis: Increased antigen presentation with increased viral clearance</b> | <b>164</b> |
| 12.1      | Baseline effector cell source model . . . . .                                              | 164        |
| 12.2      | Saturated effector cell source model . . . . .                                             | 169        |
| 12.3      | Antigen presenting cell effector cell source model . . . . .                               | 174        |

# 1 Likelihood profiles: Control macaques

## 1.1 Baseline effector cell source model

RBe14: Control (BL)

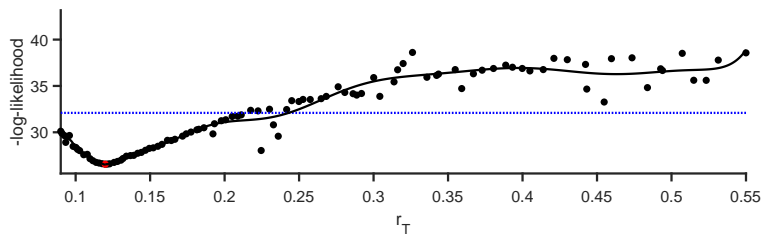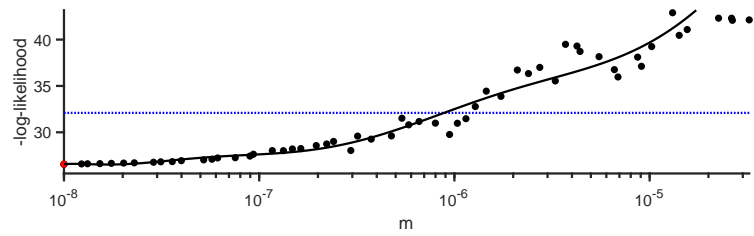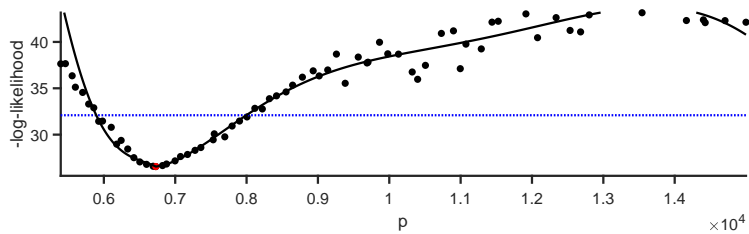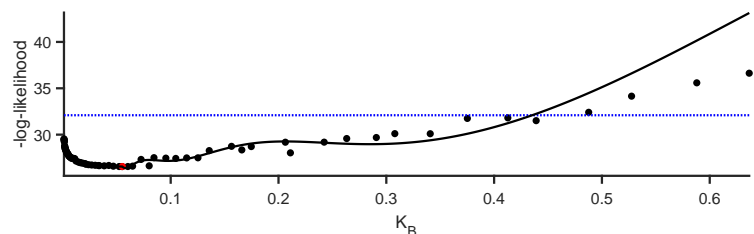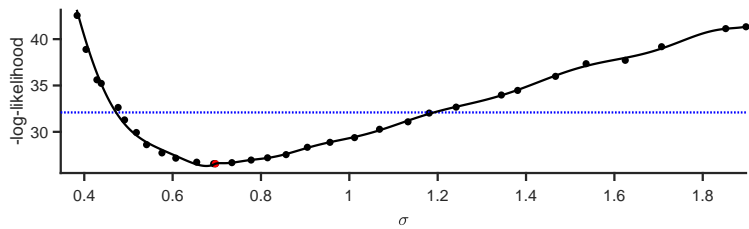

Rlt11: Control (BL)

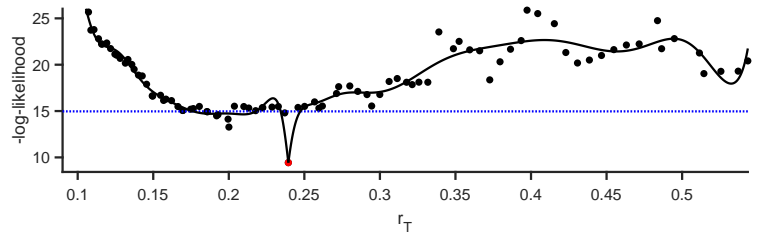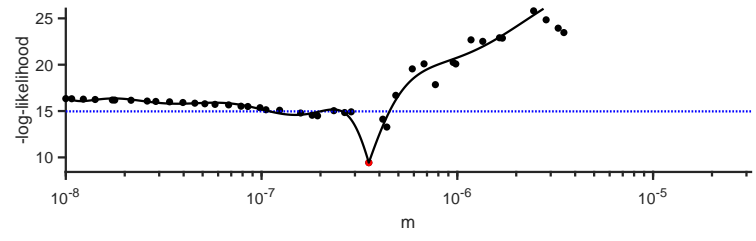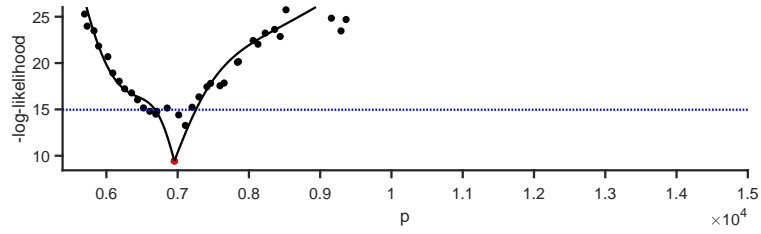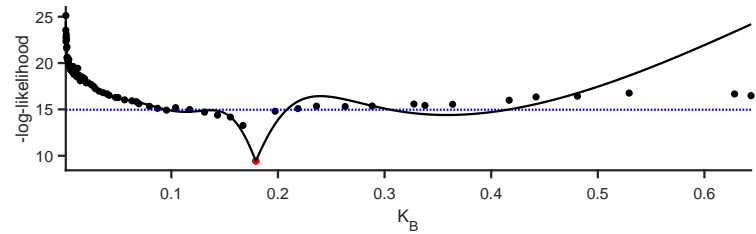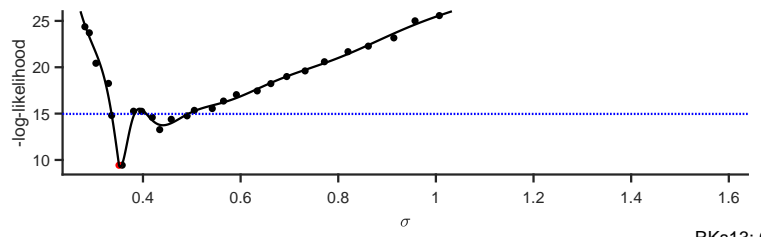

RKs13: Control (BL)

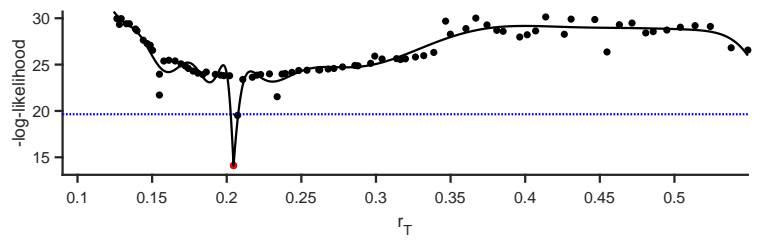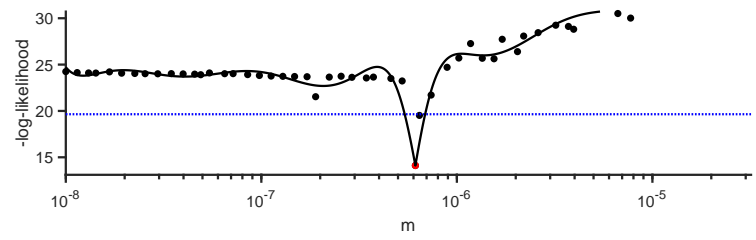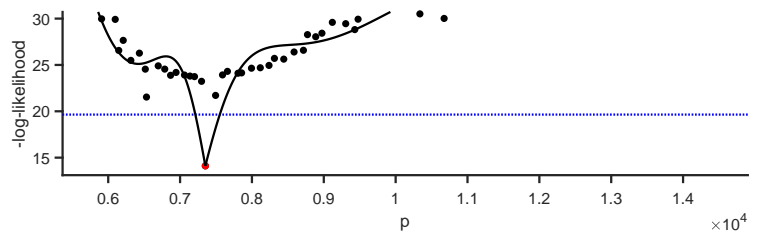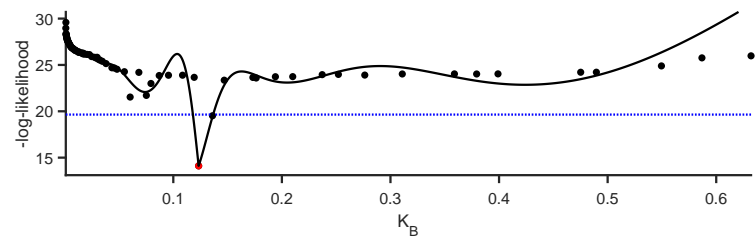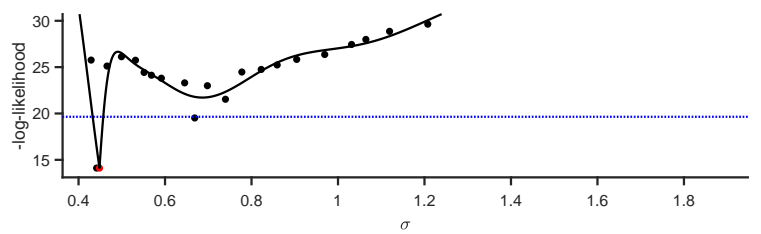



RSy13: Control (BL)

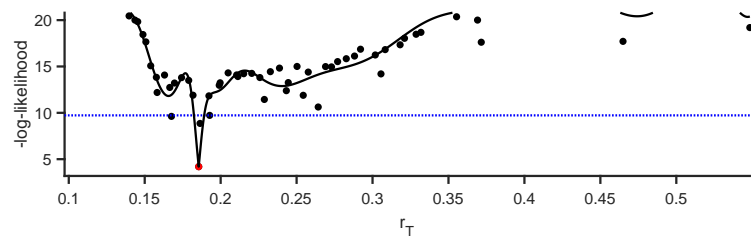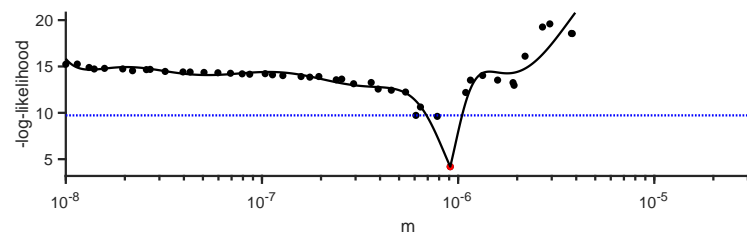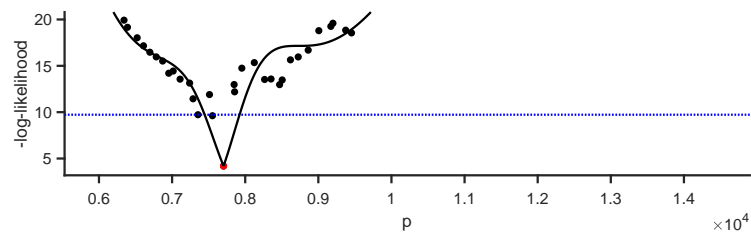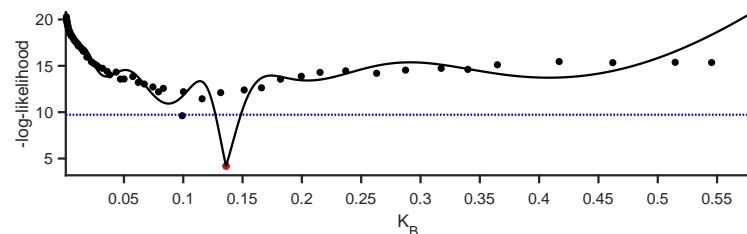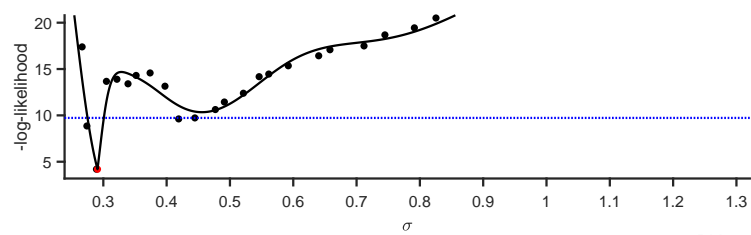

RYy13: Control (BL)

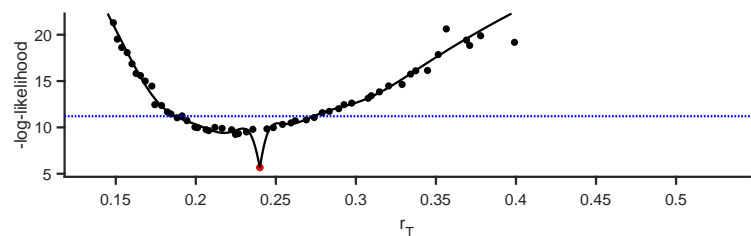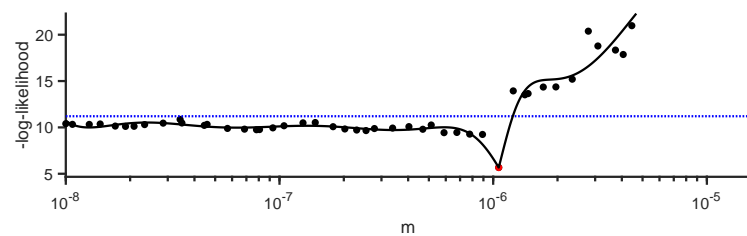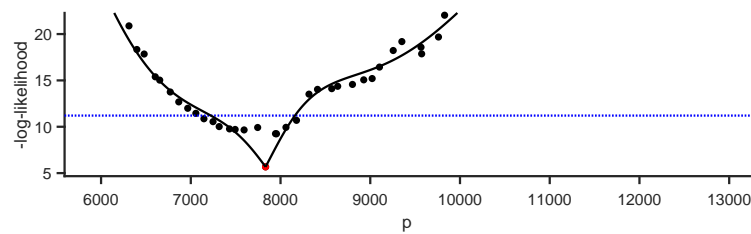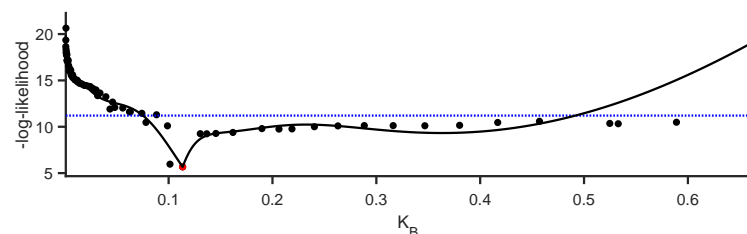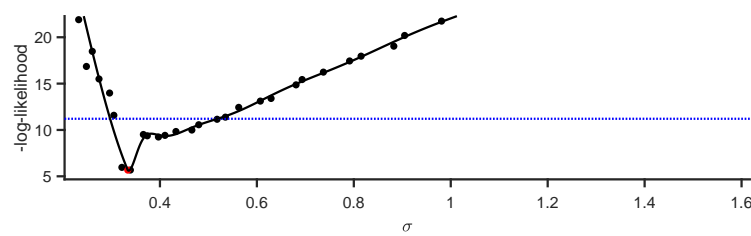

RLo14: Control (BL)

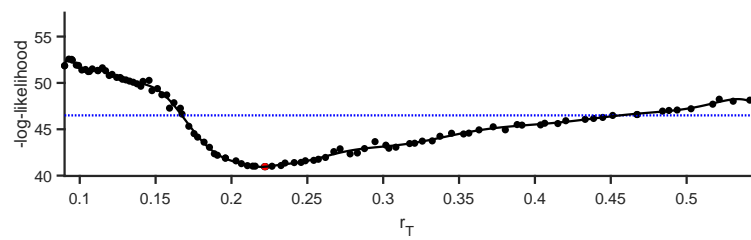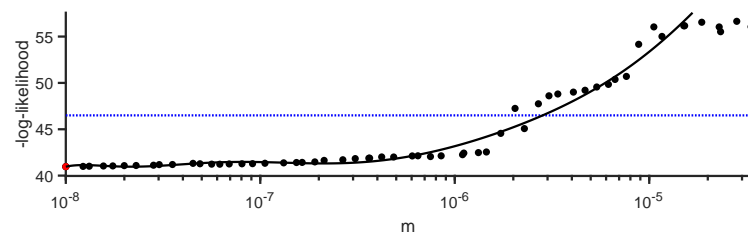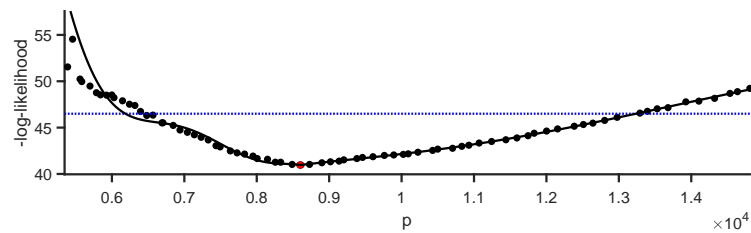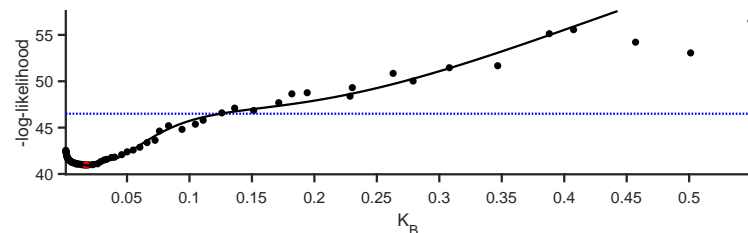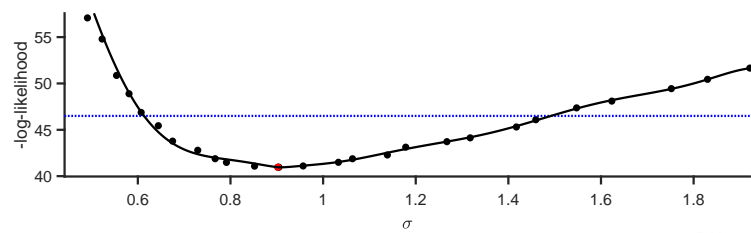

RUs14: Control (BL)

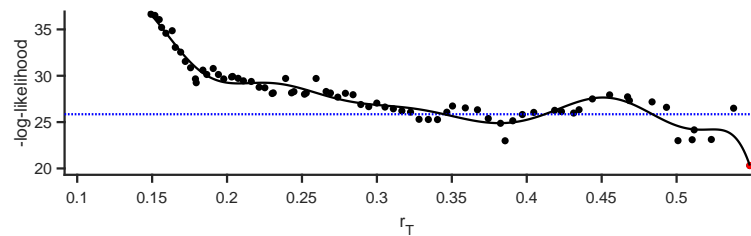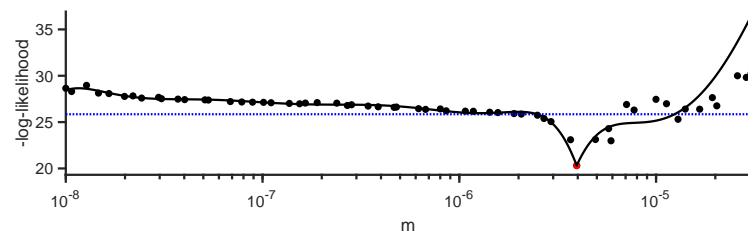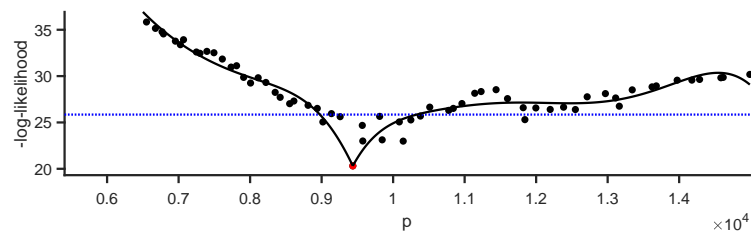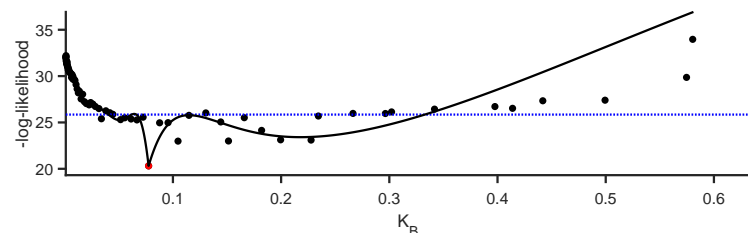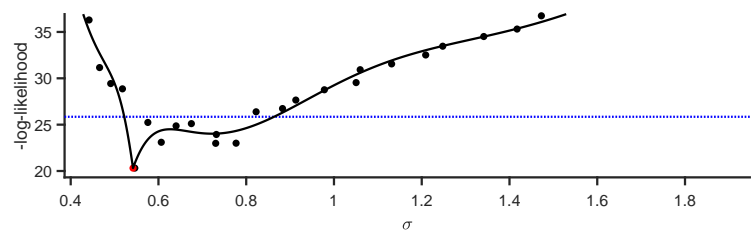

## 1.2 Saturated effector cell source model

RBe14: Control (SS)

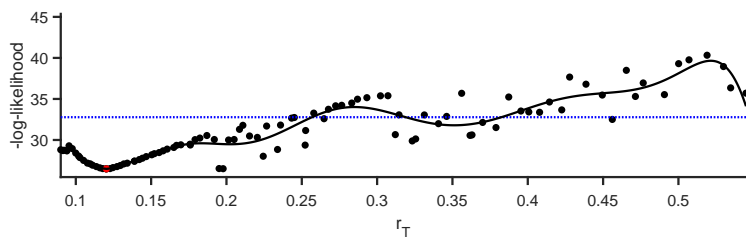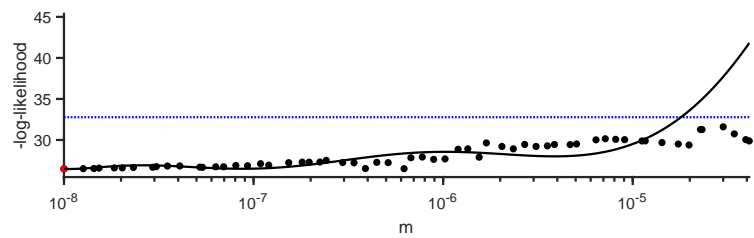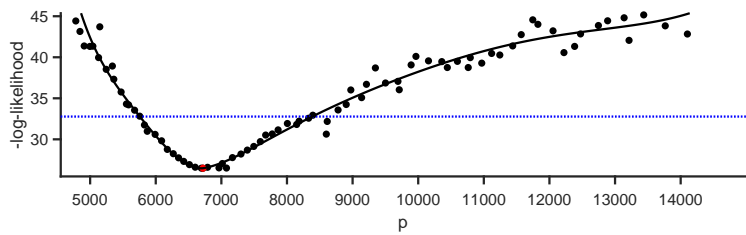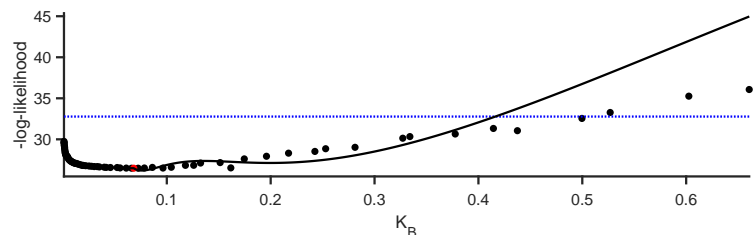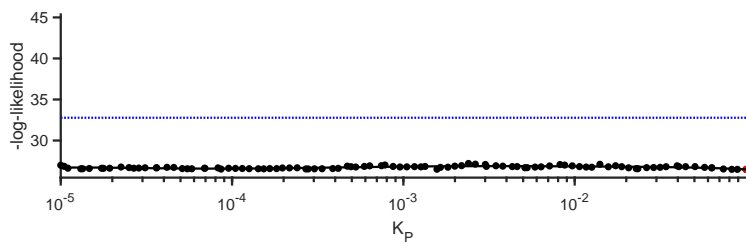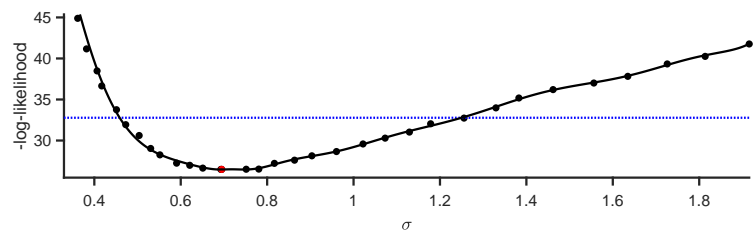

Rlt11: Control (SS)

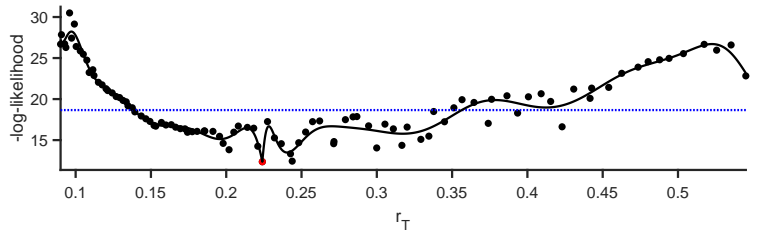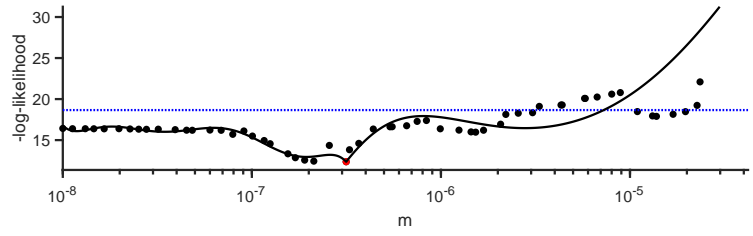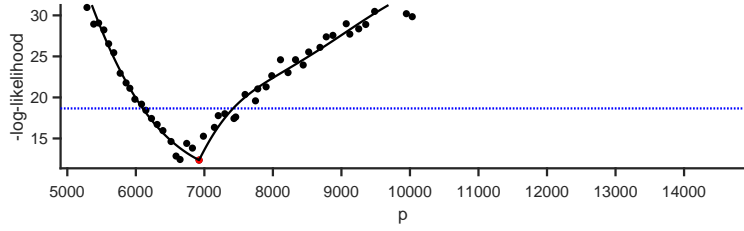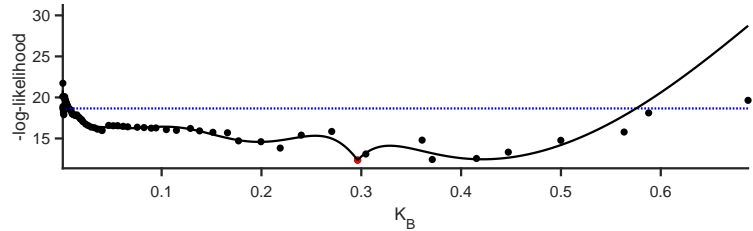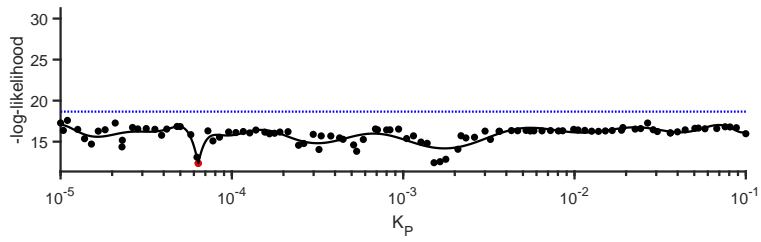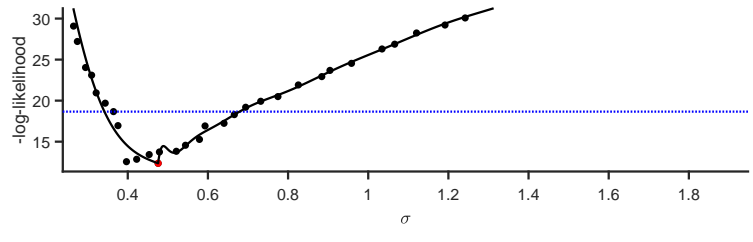

RKs13: Control (SS)

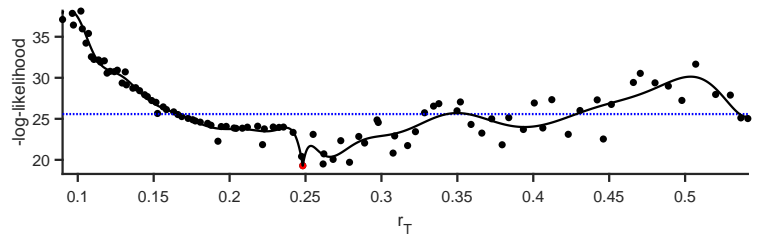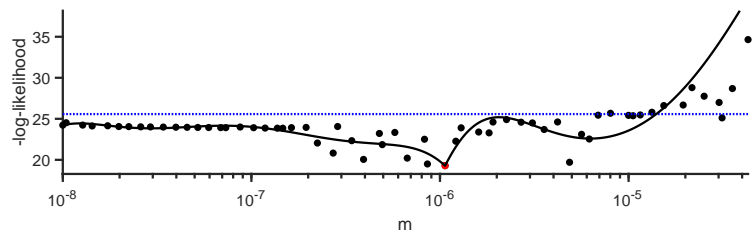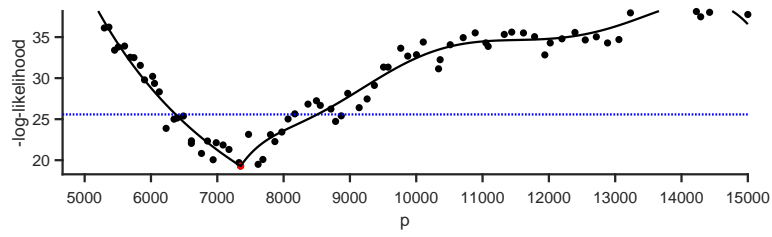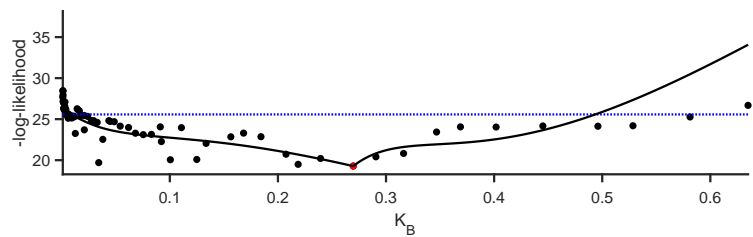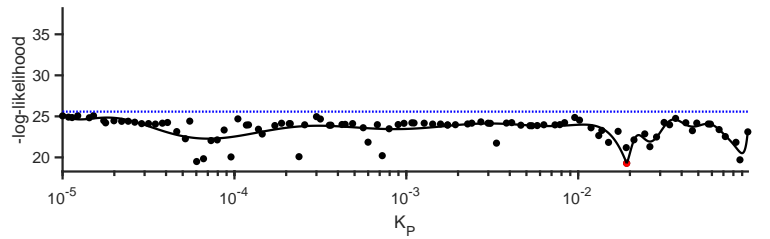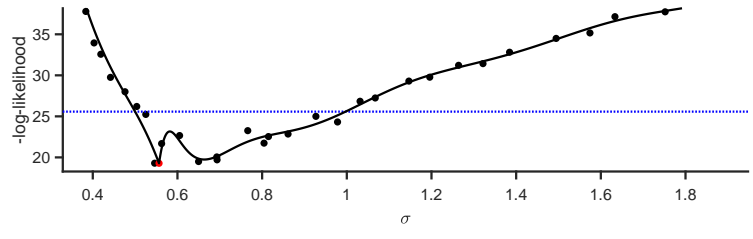

RSy13: Control (SS)

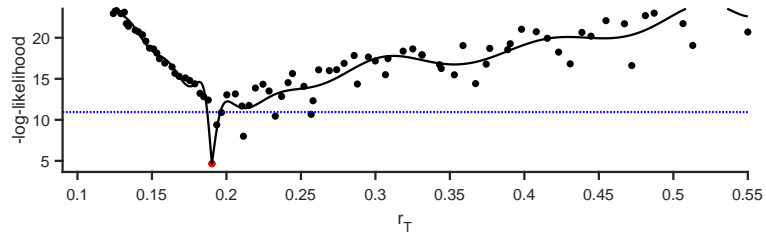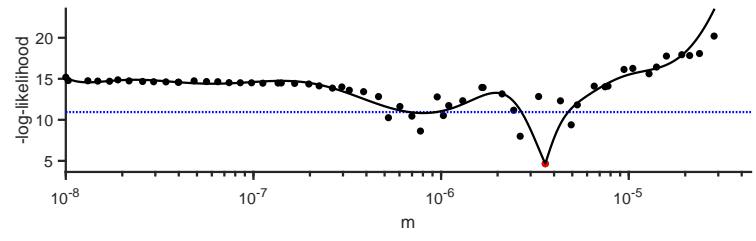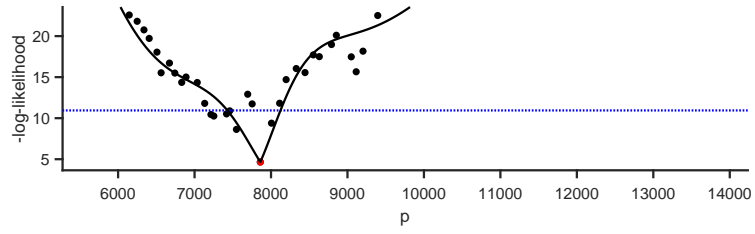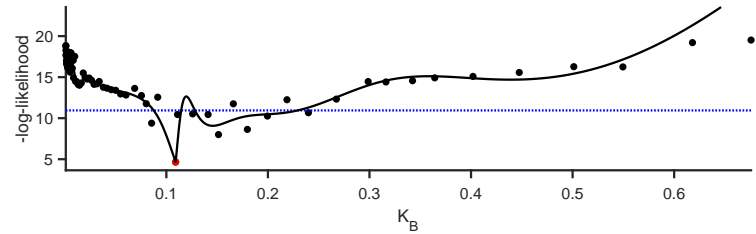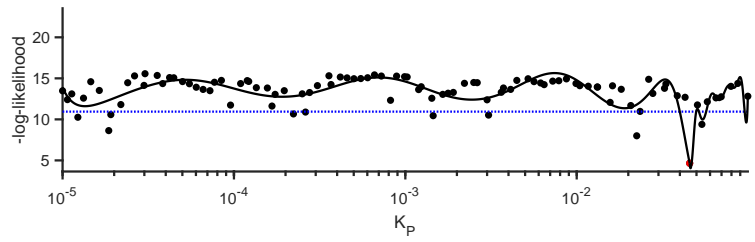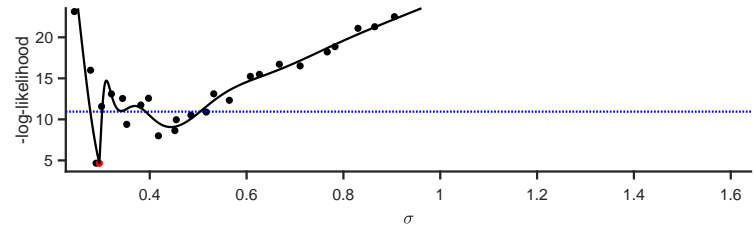

RYY13: Control (SS)

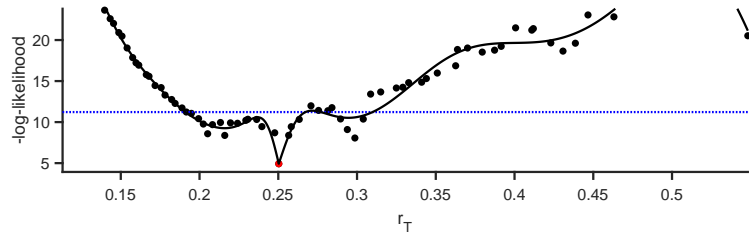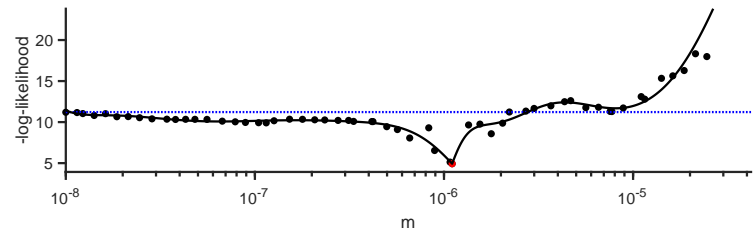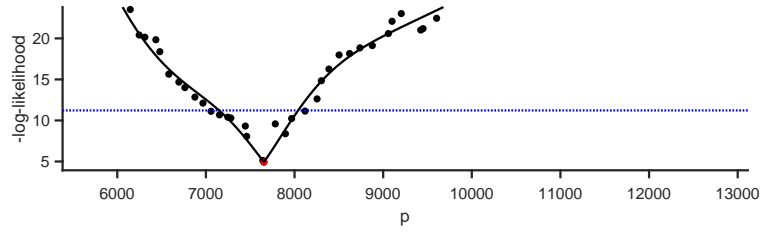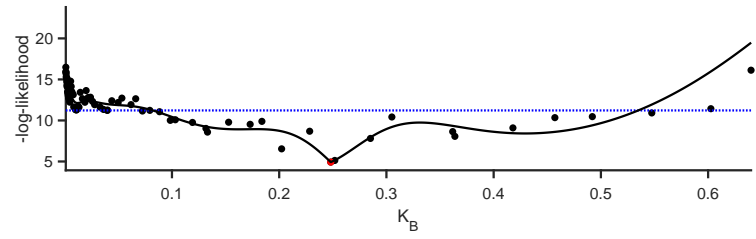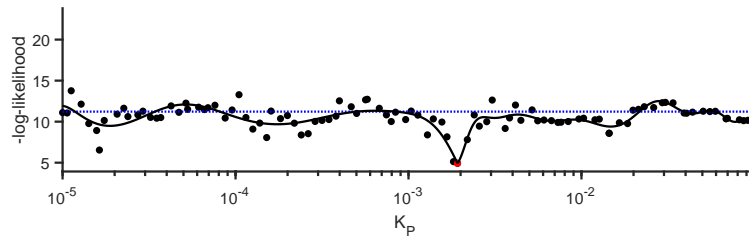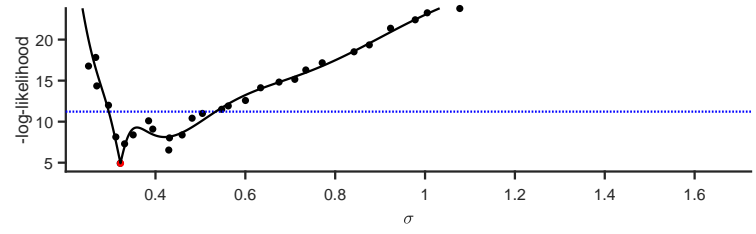

RLo14: Control (SS)

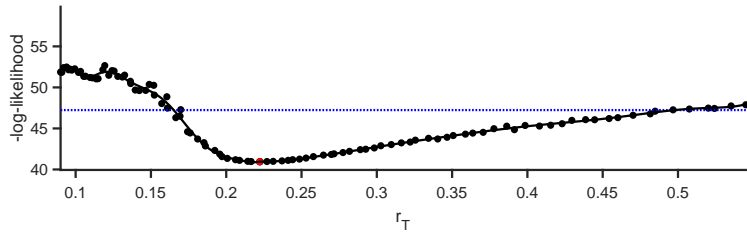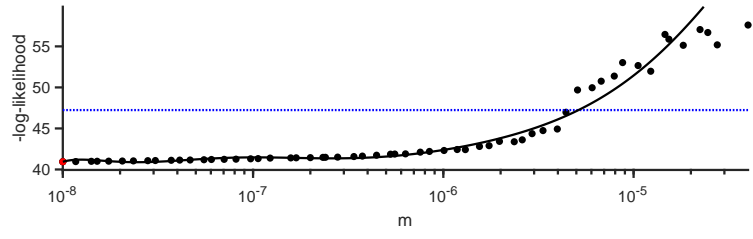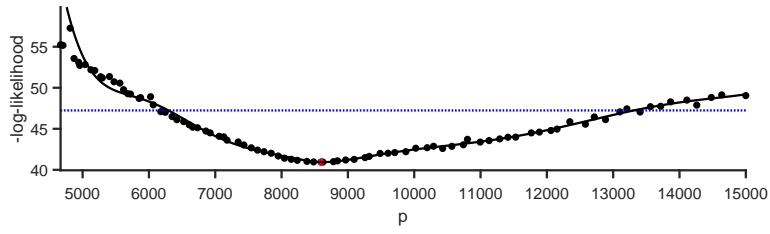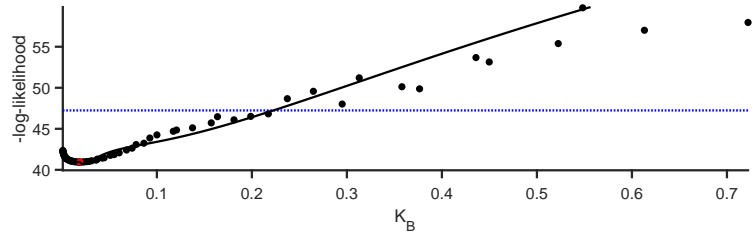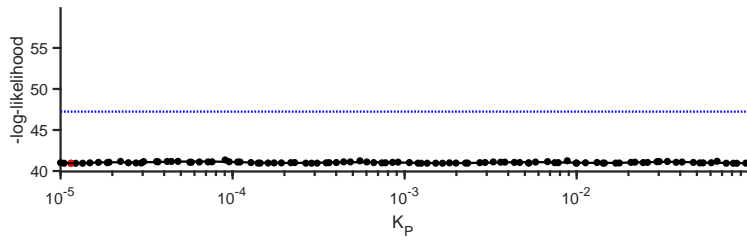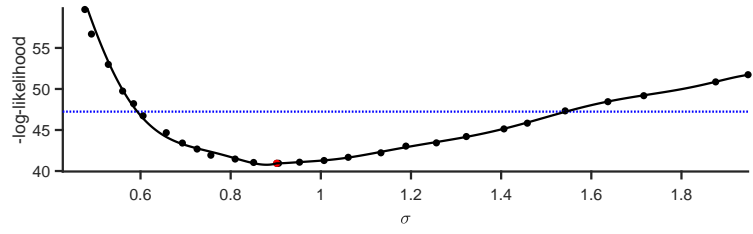



RUs14: Control (SS)

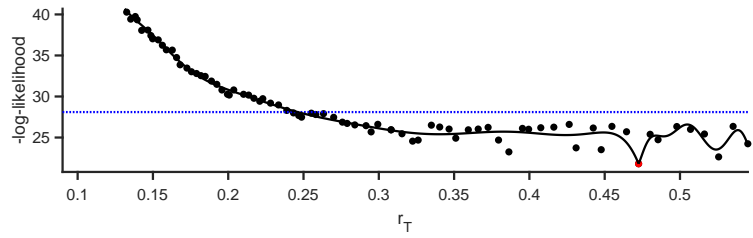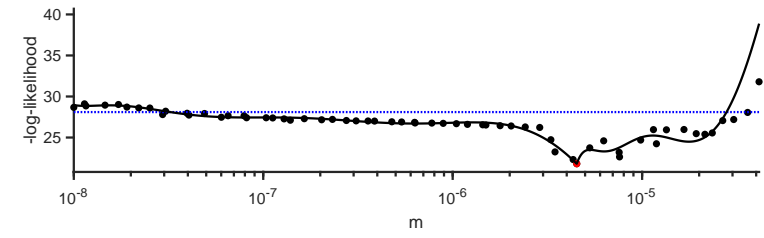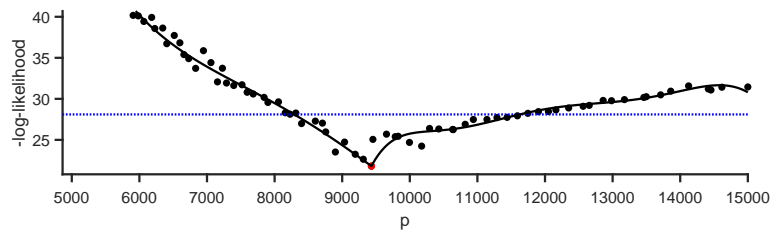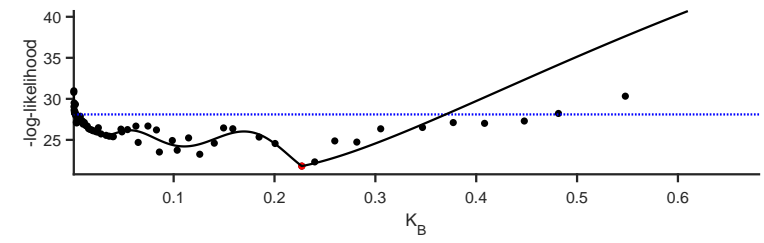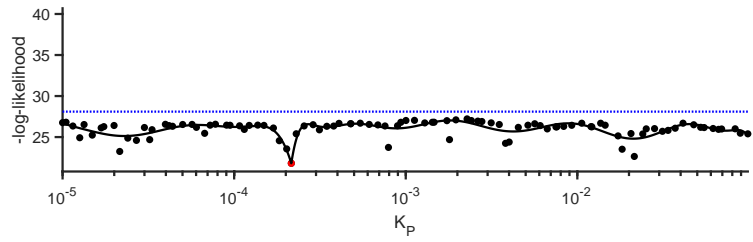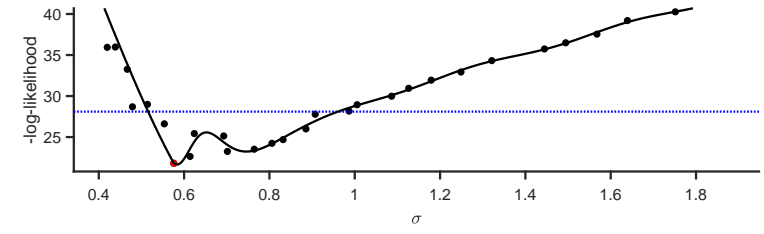

### 1.3 Antigen presenting cell effector cell source model

RBe14: Control (APCS)

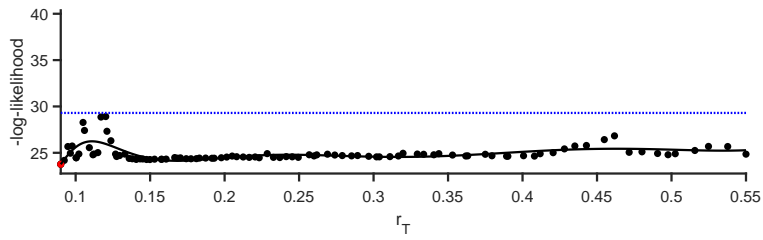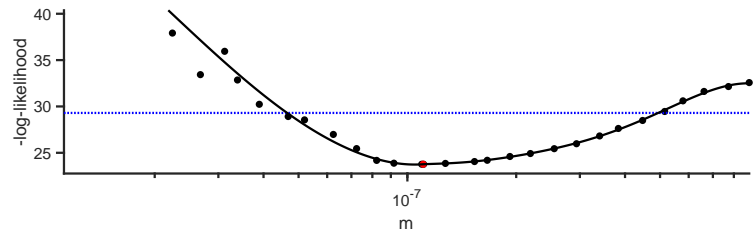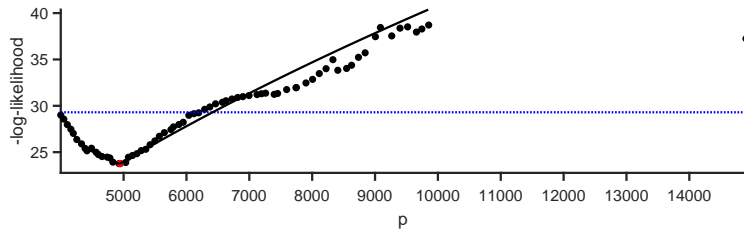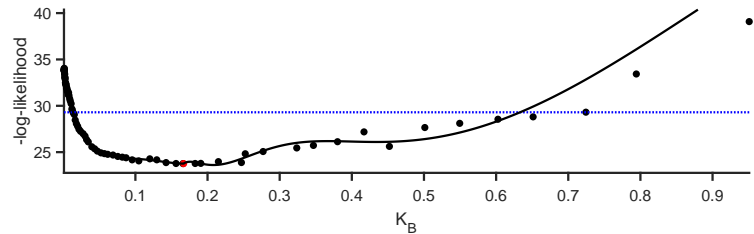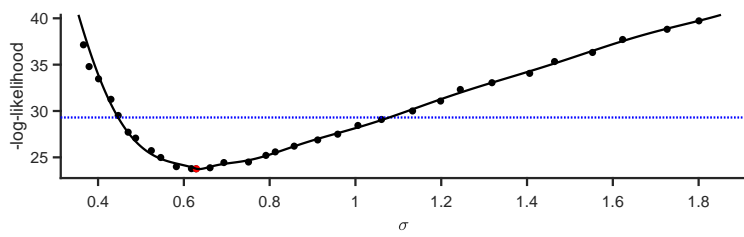

Rlt11: Control (APCS)

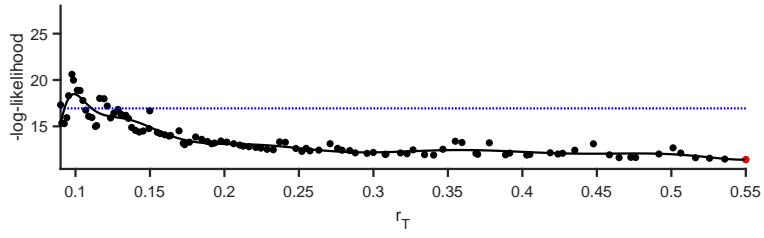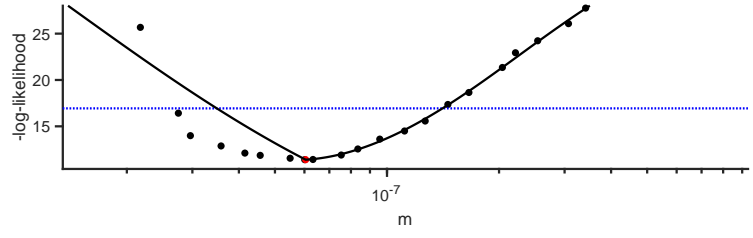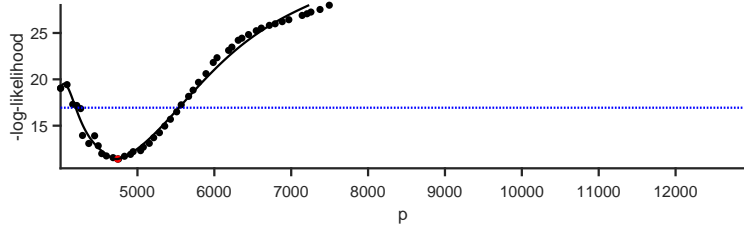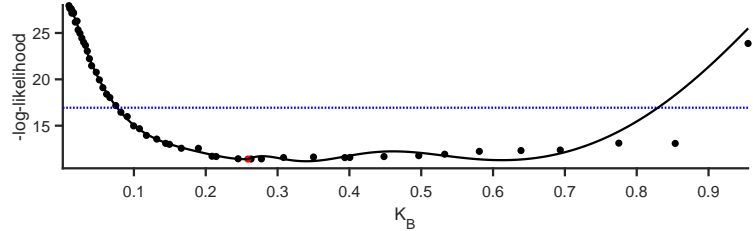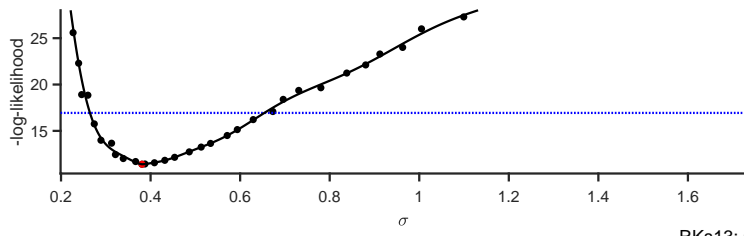

RKs13: Control (APCS)

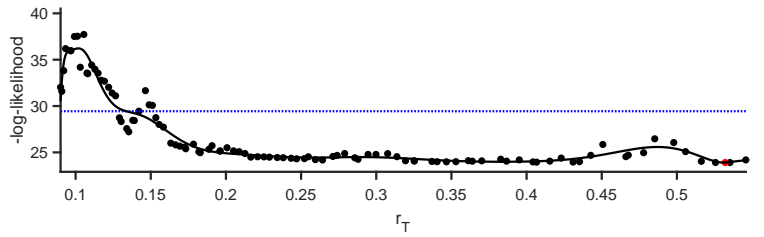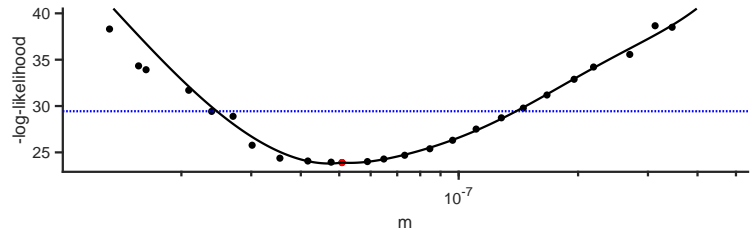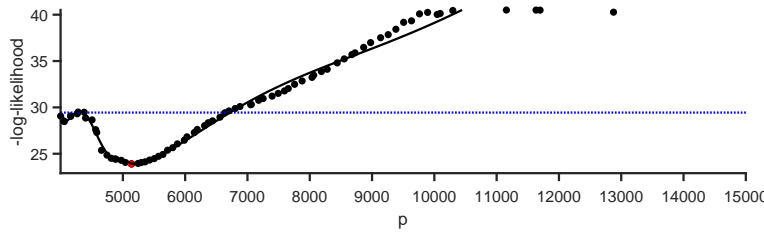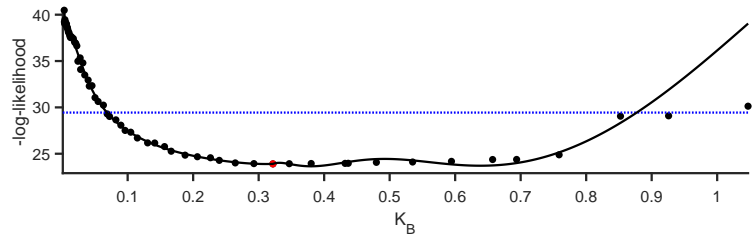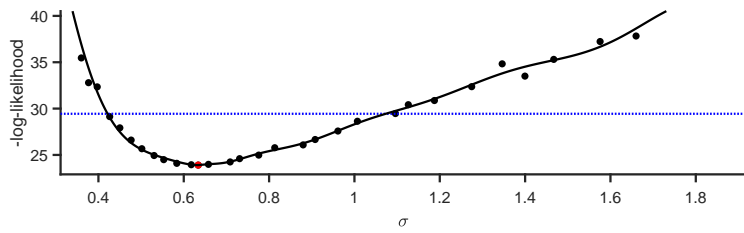

RSy13: Control (APCS)

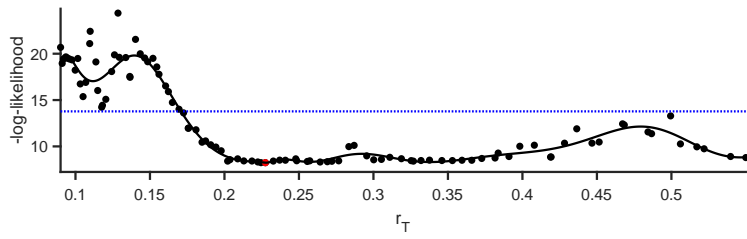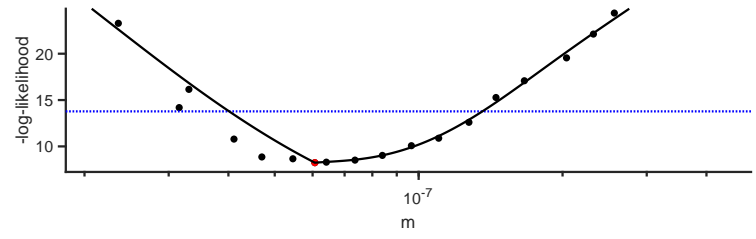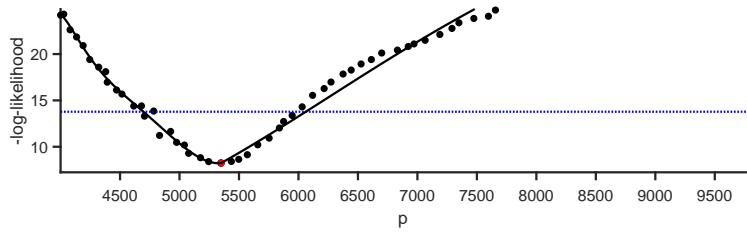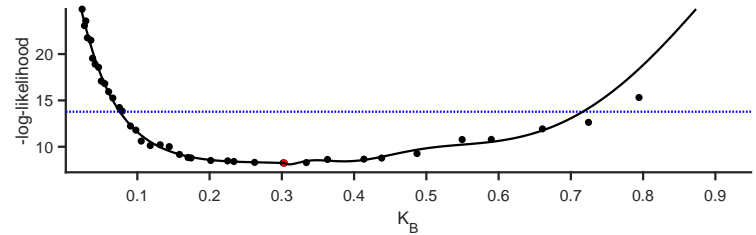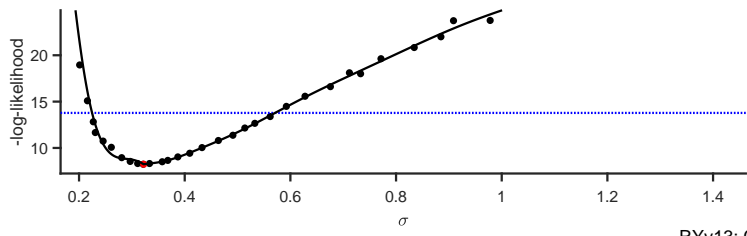

RYy13: Control (APCS)

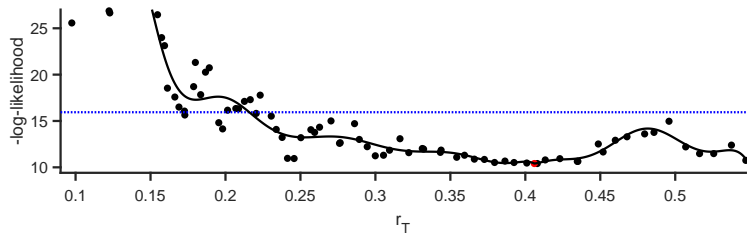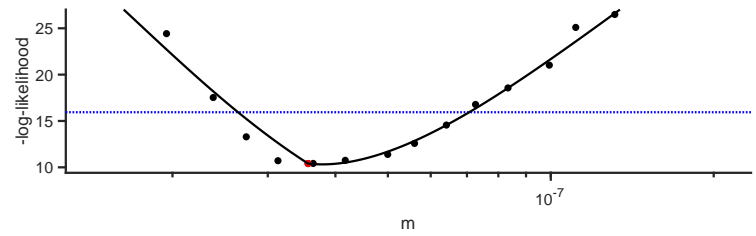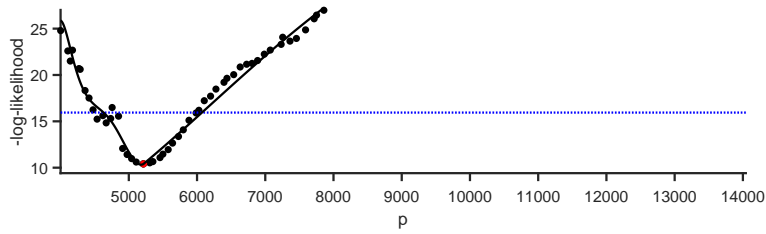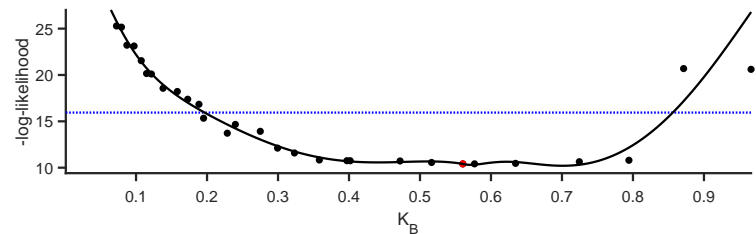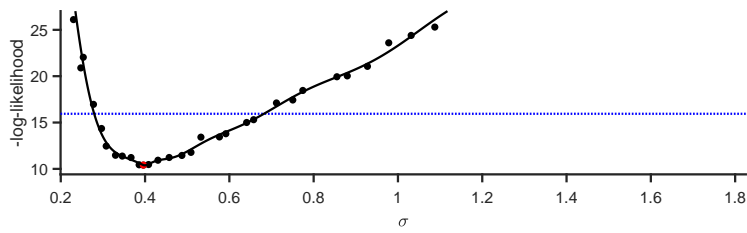

RLo14: Control (APCS)

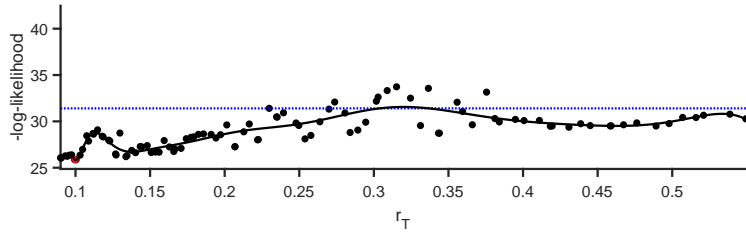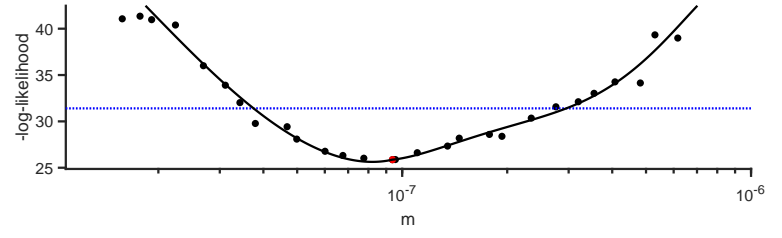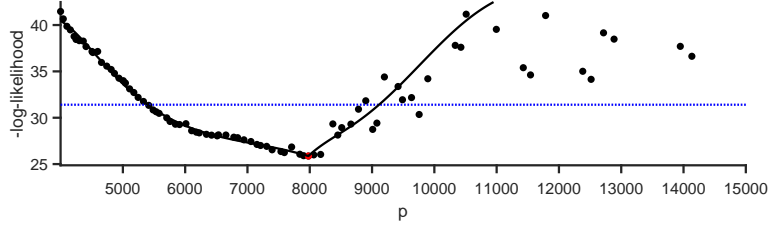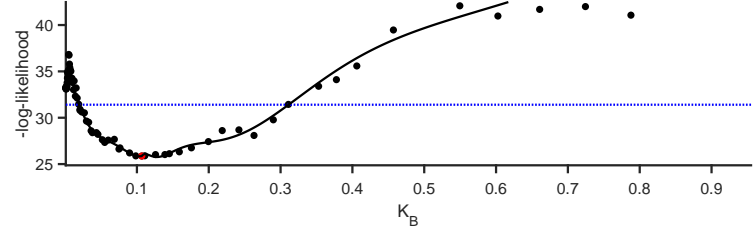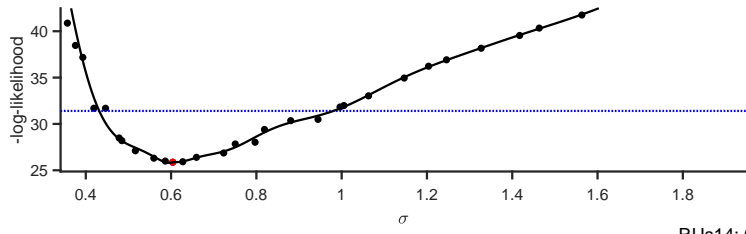

RUs14: Control (APCS)

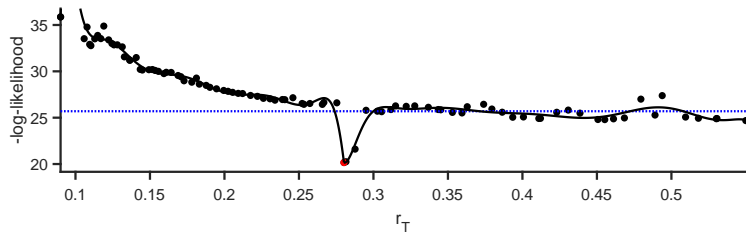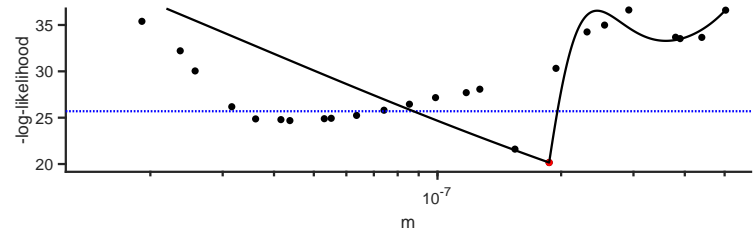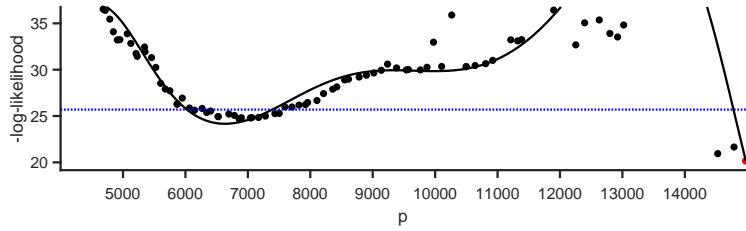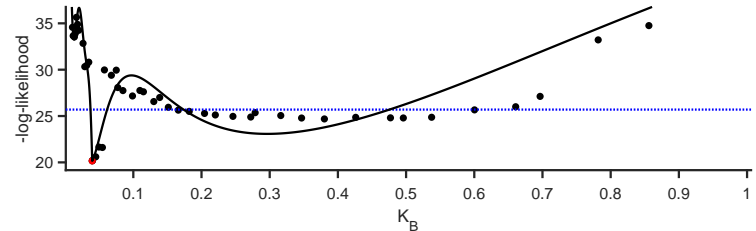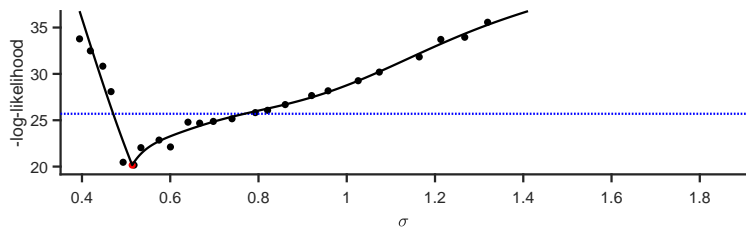

## 2 Sensitivity analysis: Control macaques

### 2.1 Baseline effector cell source model

RBe14: Control (BL)

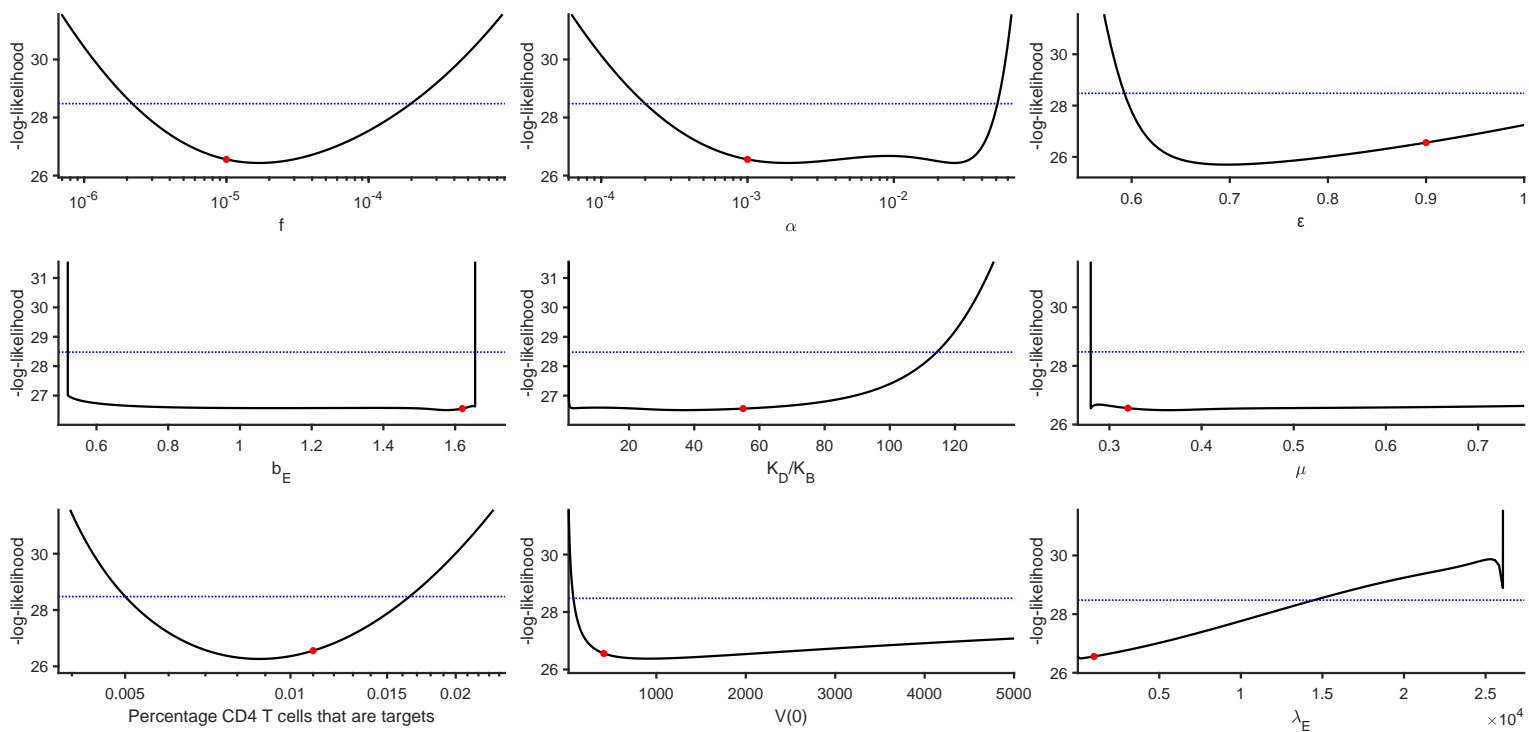

Rt11: Control (BL)

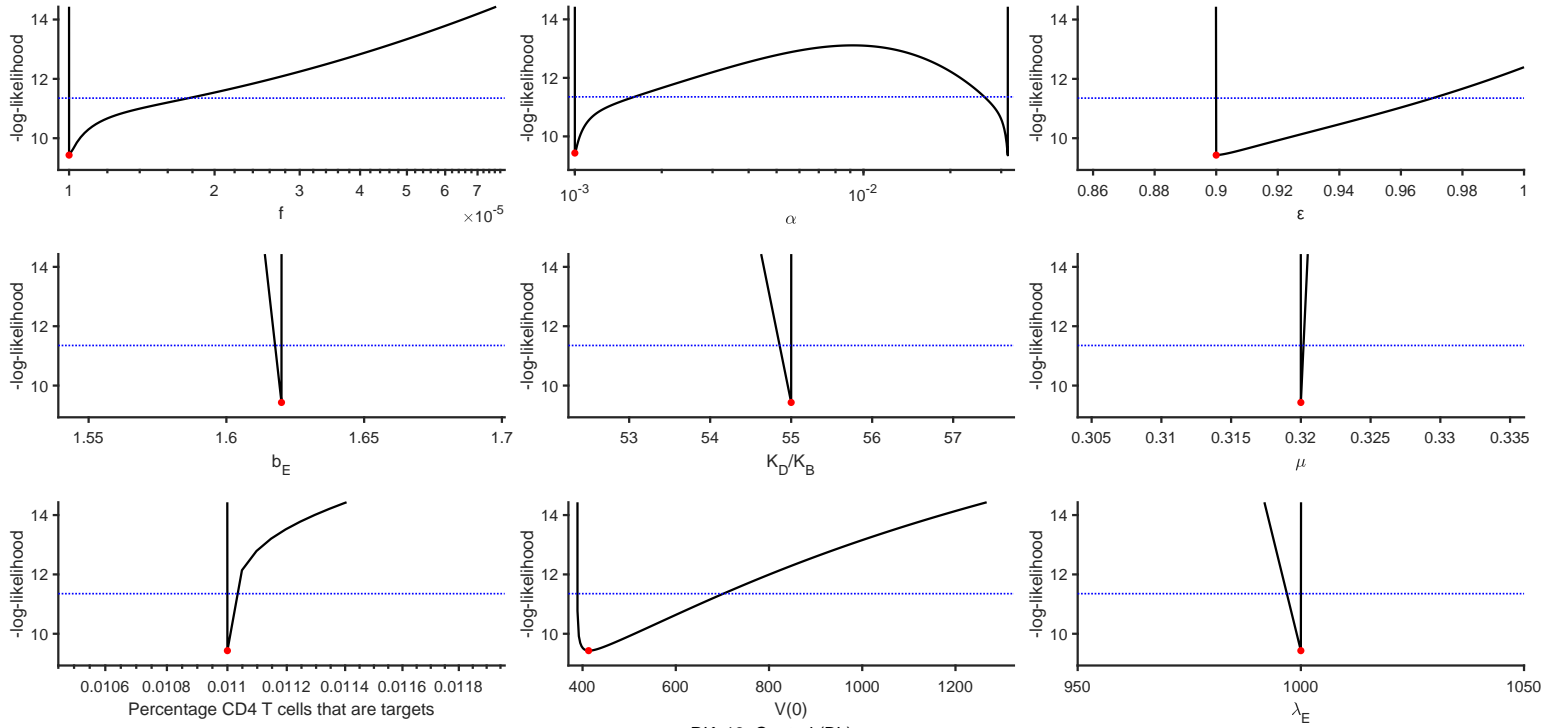

RKs13: Control (BL)

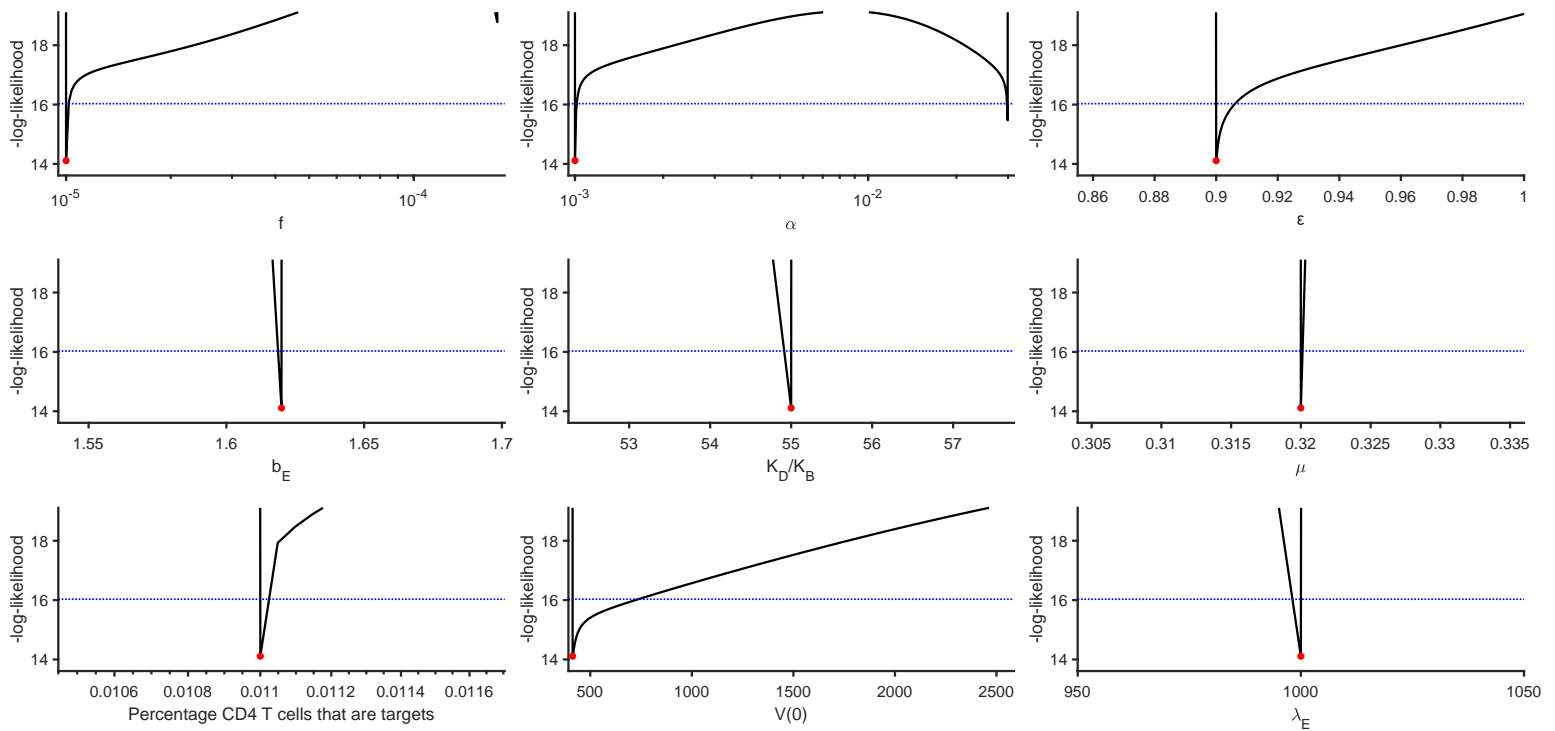

RSy13: Control (BL)

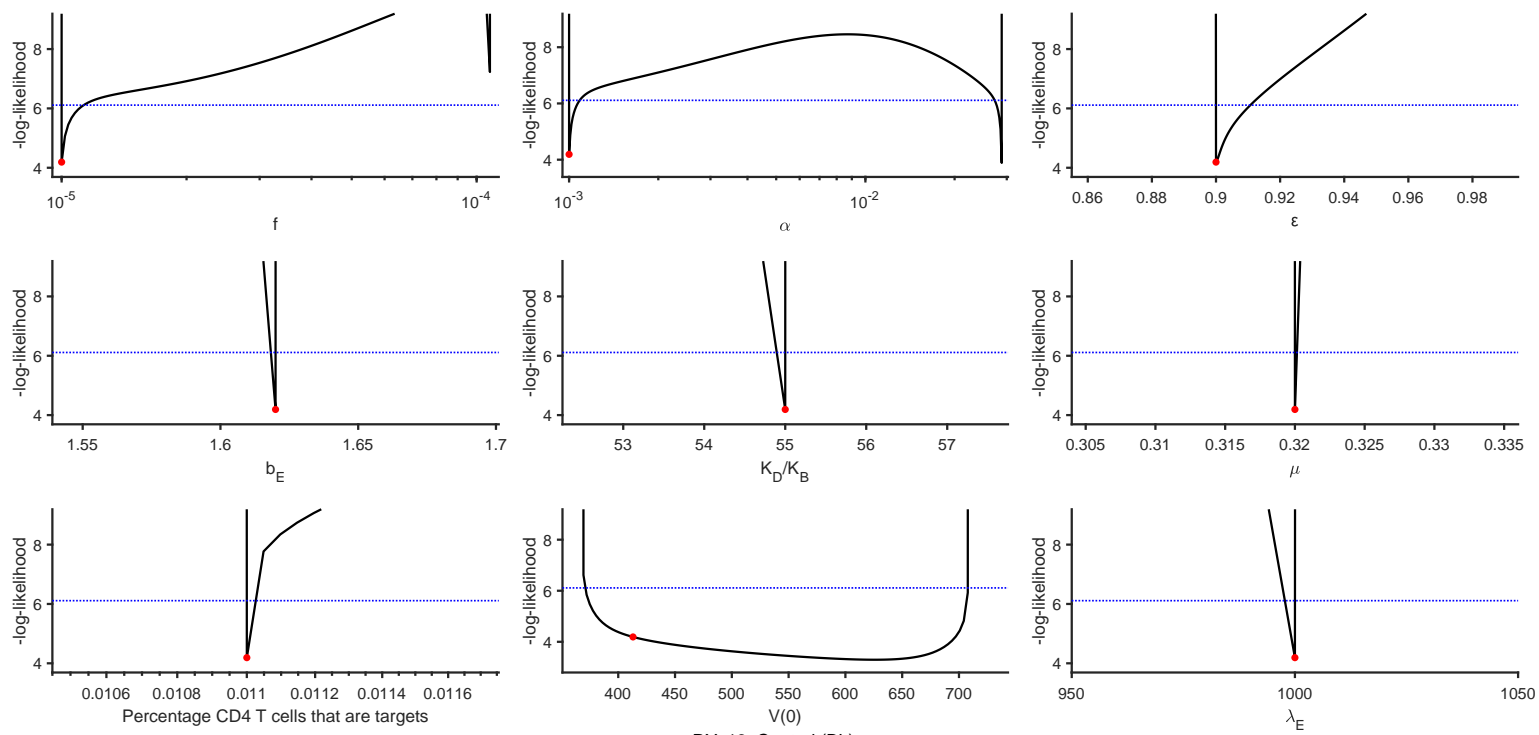

RYy13: Control (BL)

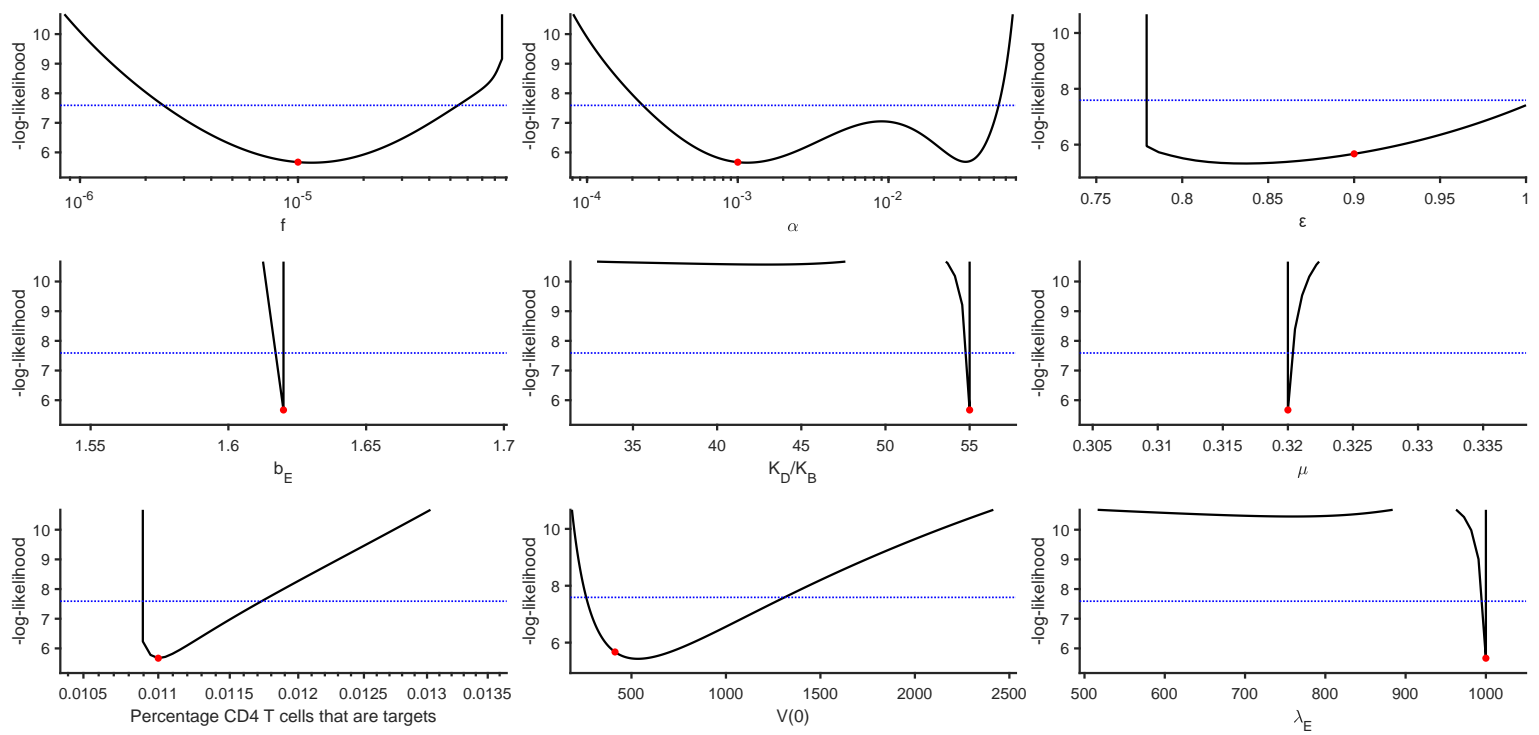



RLo14: Control (BL)

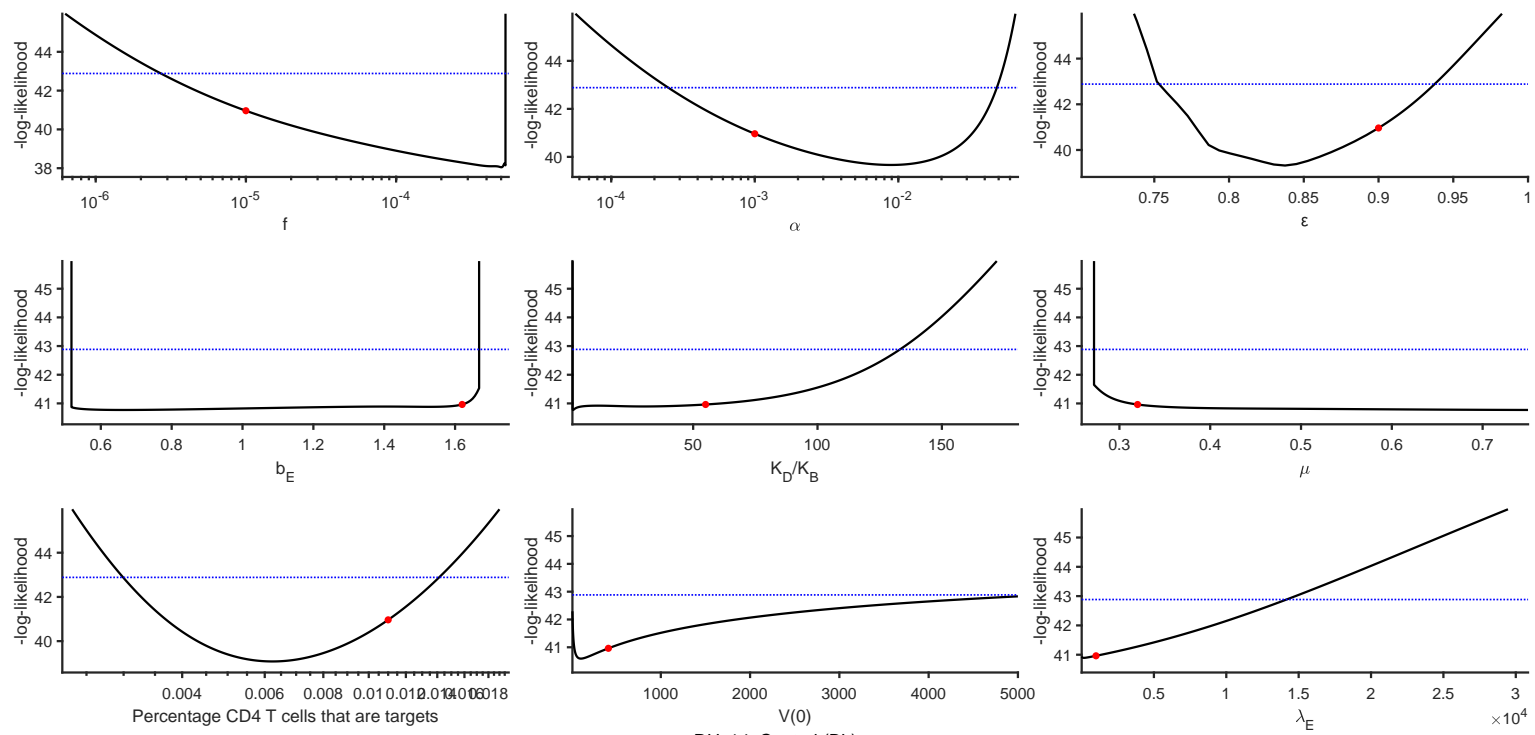

RU14: Control (BL)

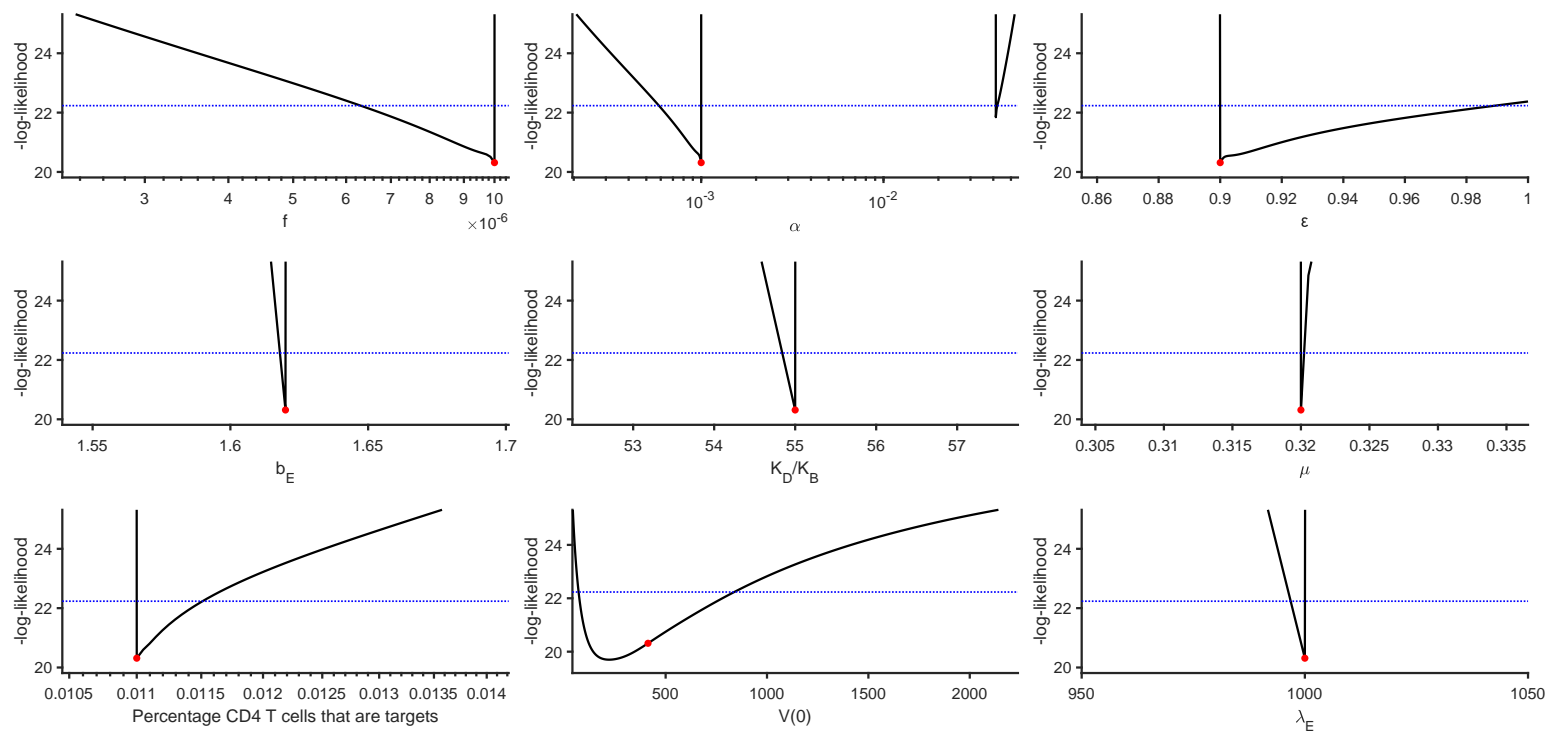

## 2.2 Saturated effector cell source model

RBe14: Control (SS)

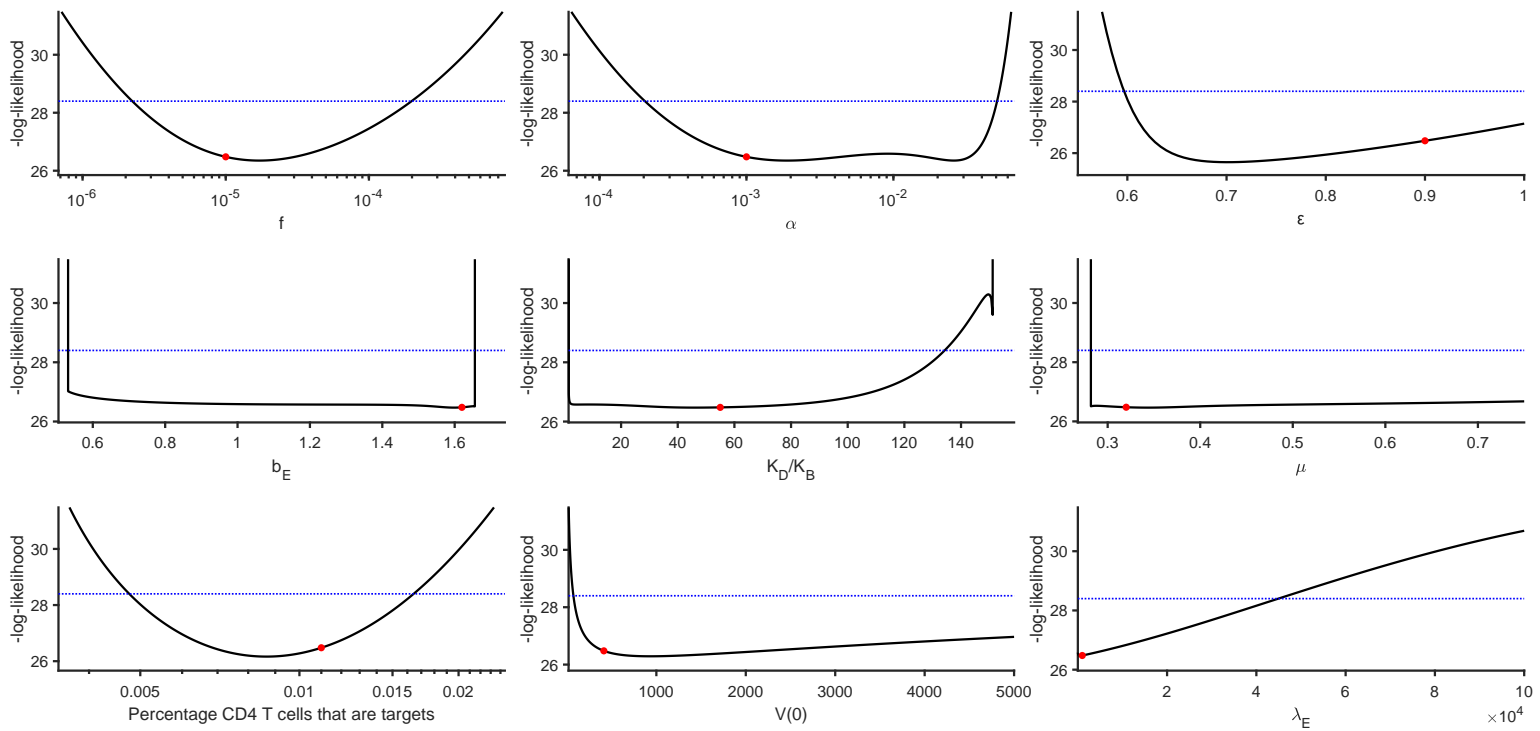

RIt11: Control (SS)

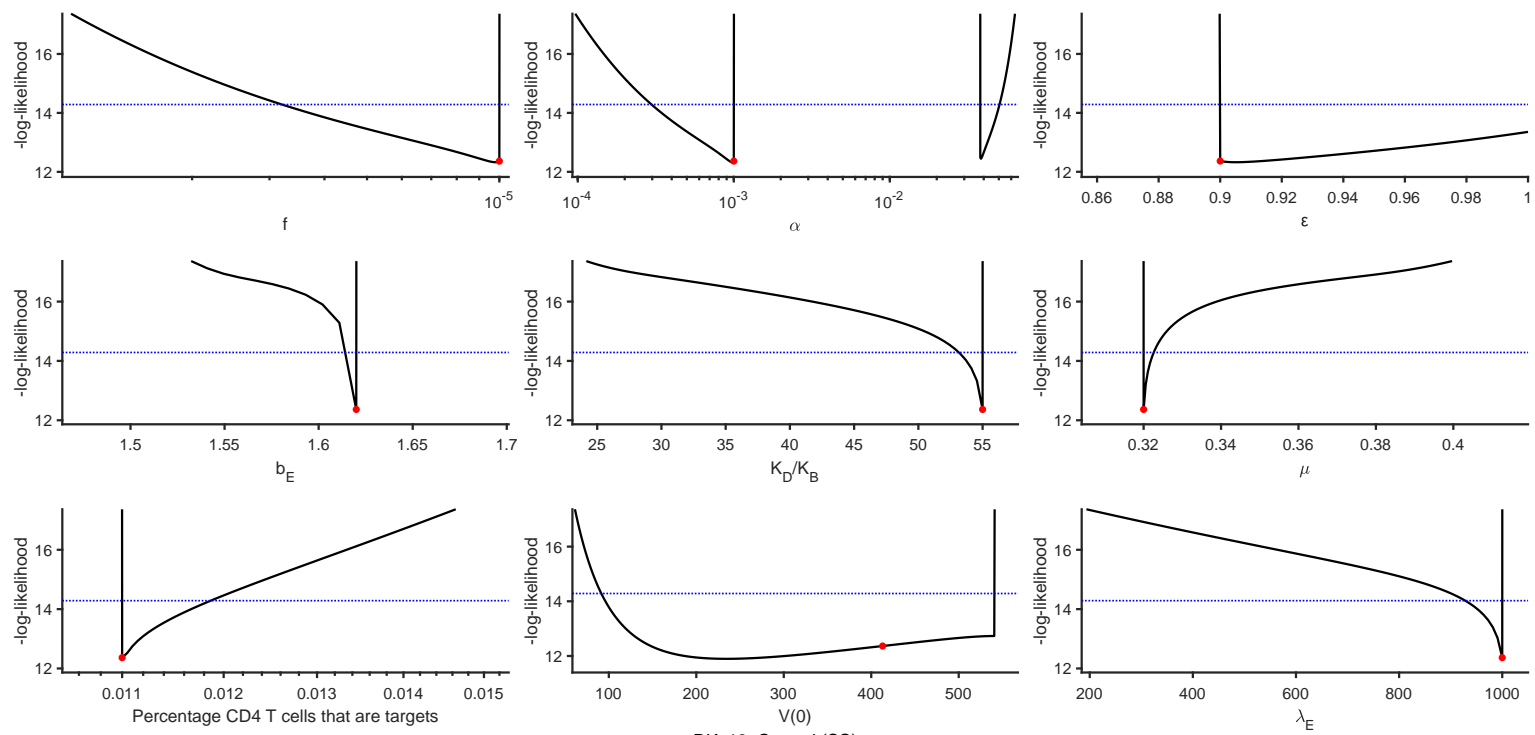

RKs13: Control (SS)

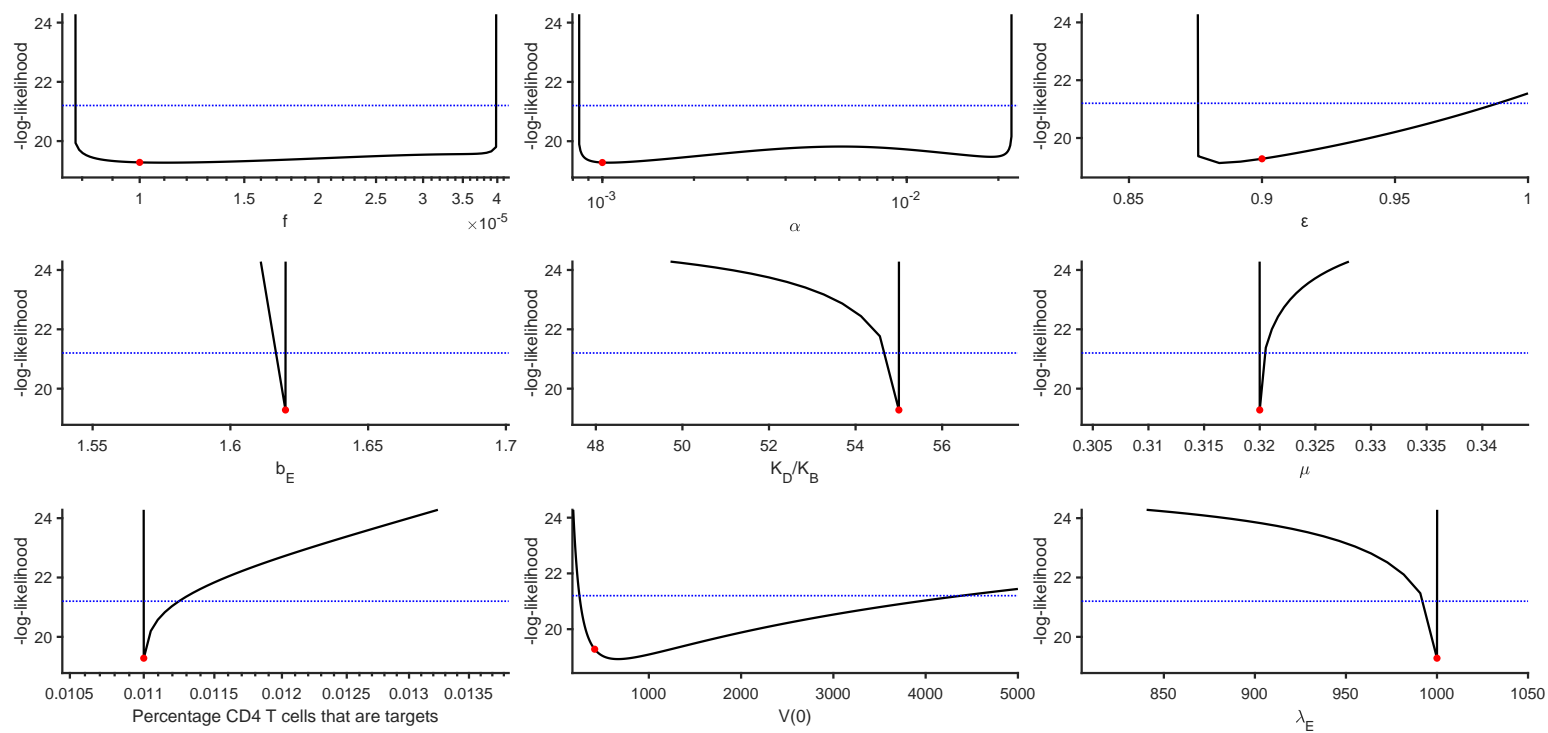

RSy13: Control (SS)

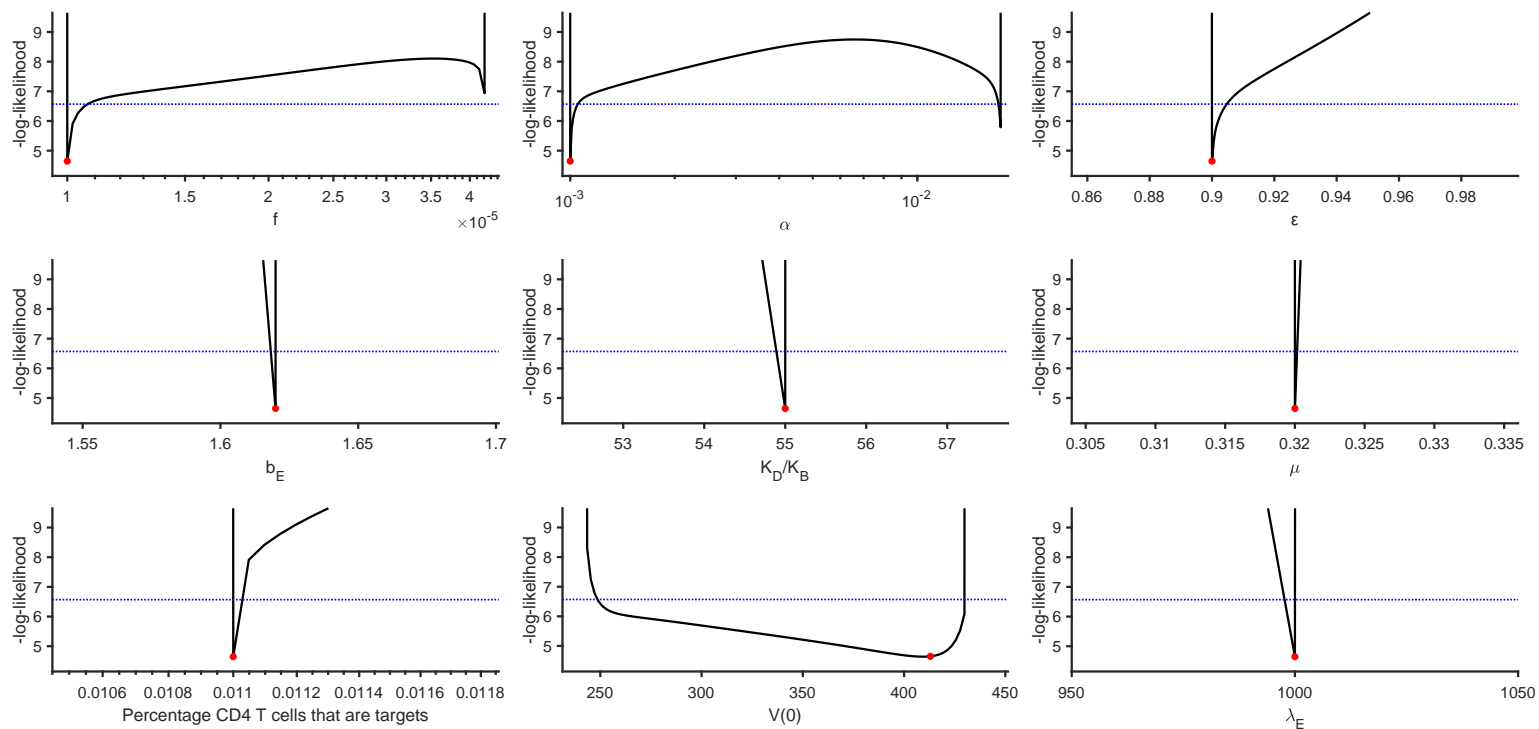

Ry13: Control (SS)

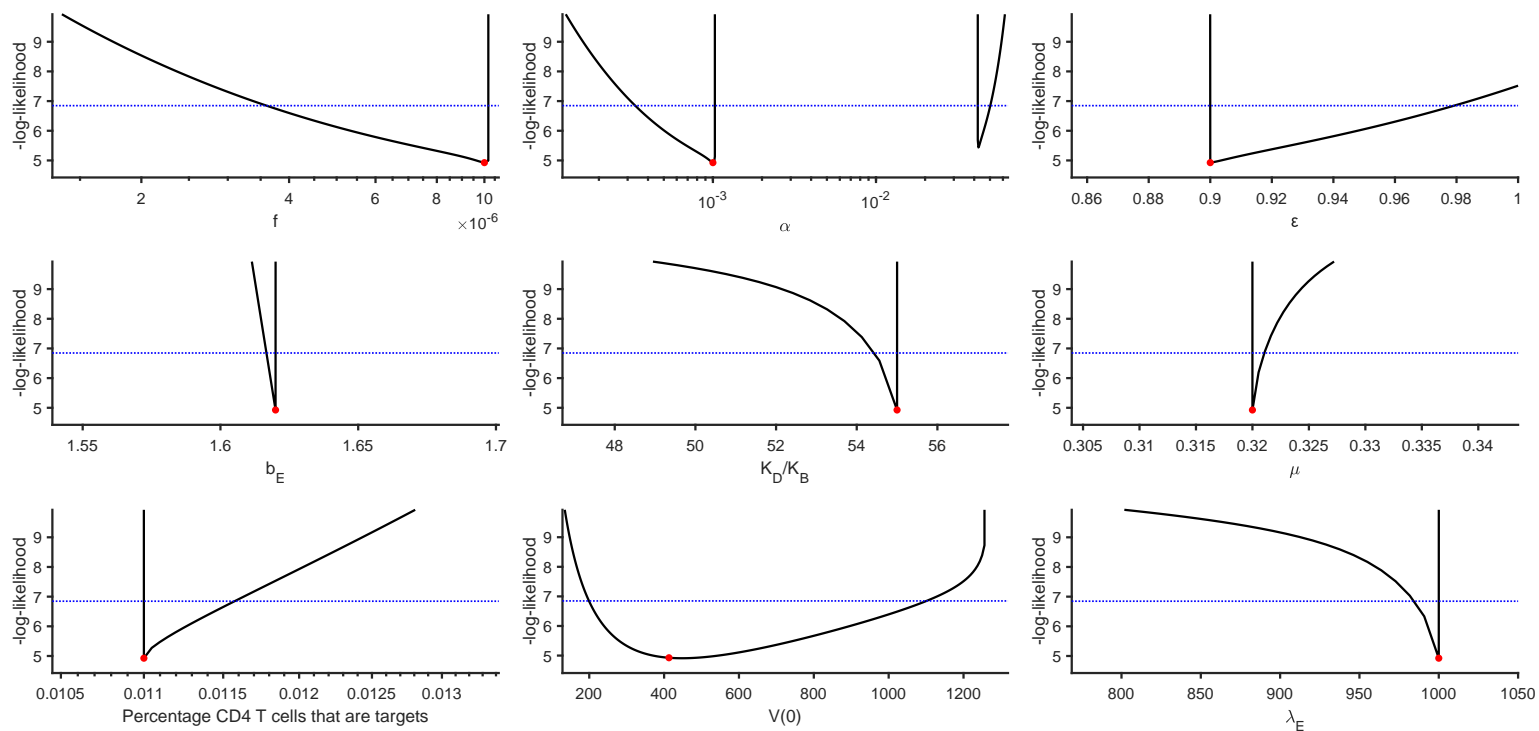

RLo14: Control (SS)

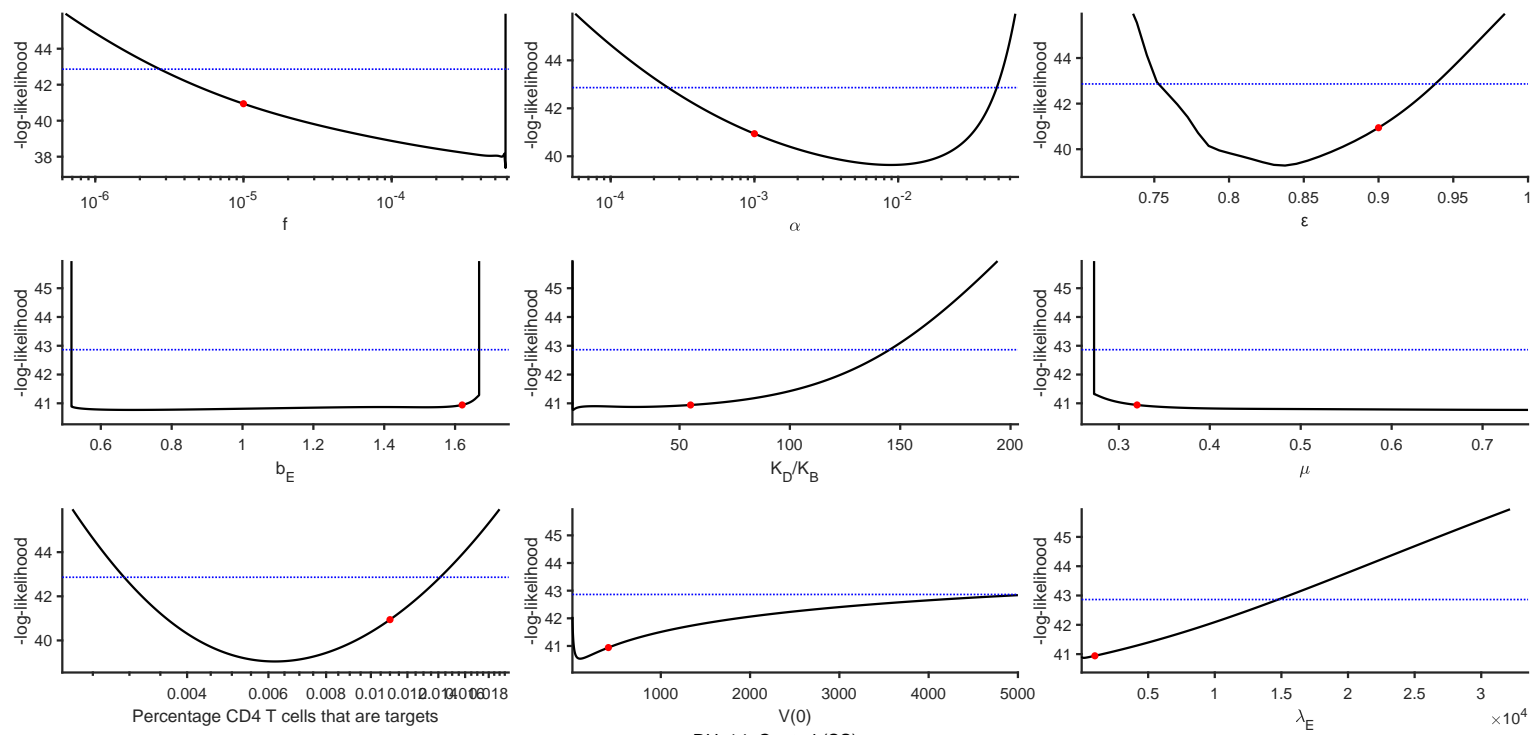

RUs14: Control (SS)

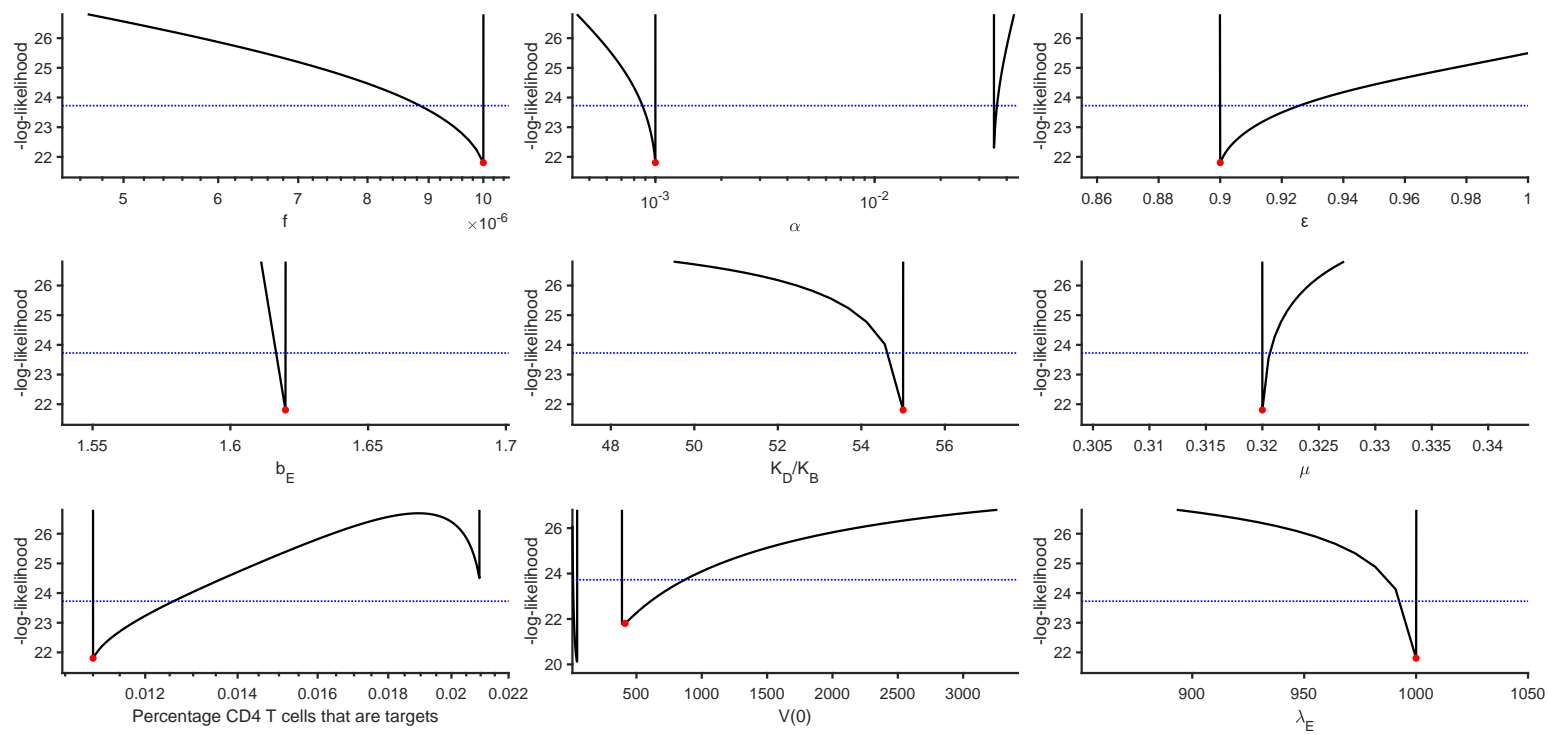

## 2.3 Antigen presenting cell effector cell source model

RBe14: Control (APS)

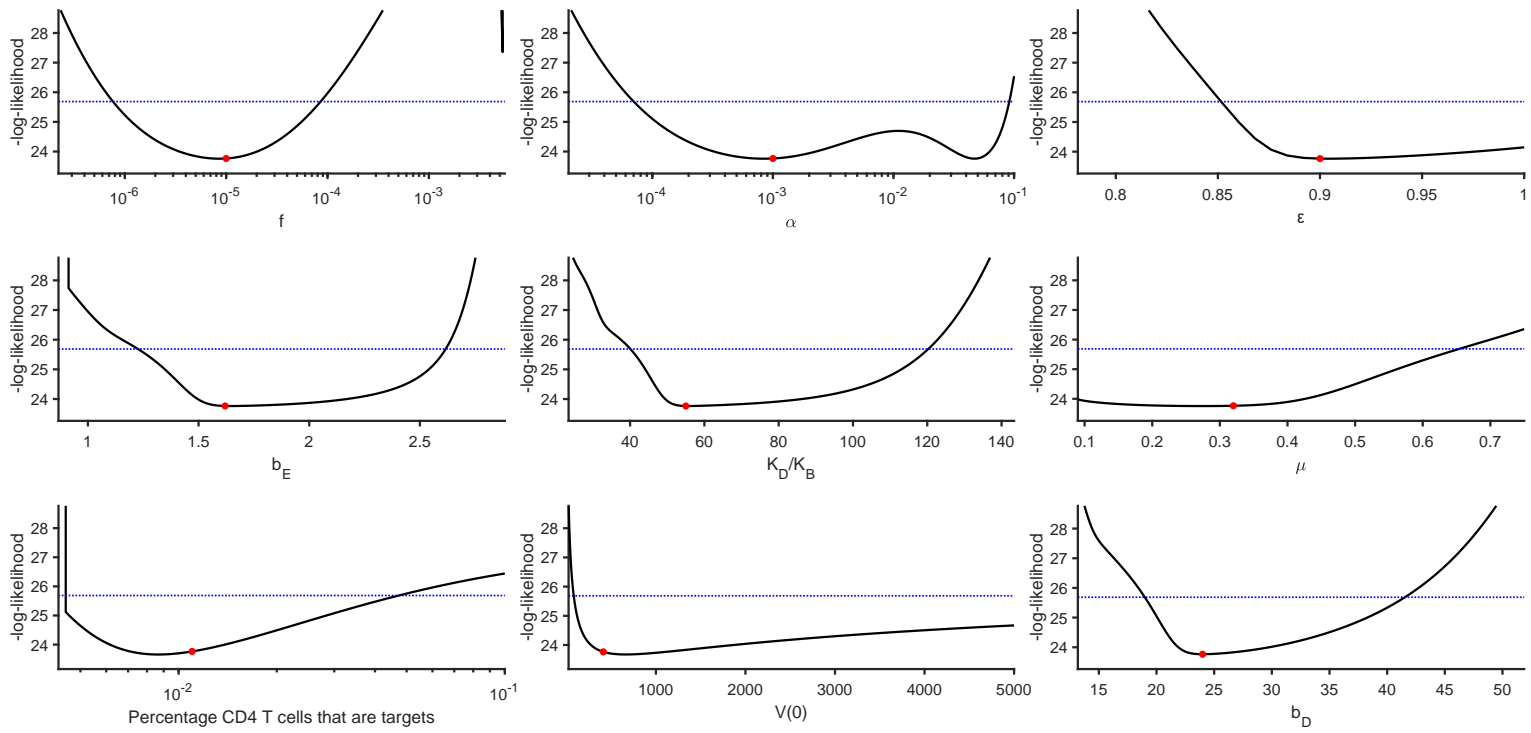

Rlt11: Control (APS)

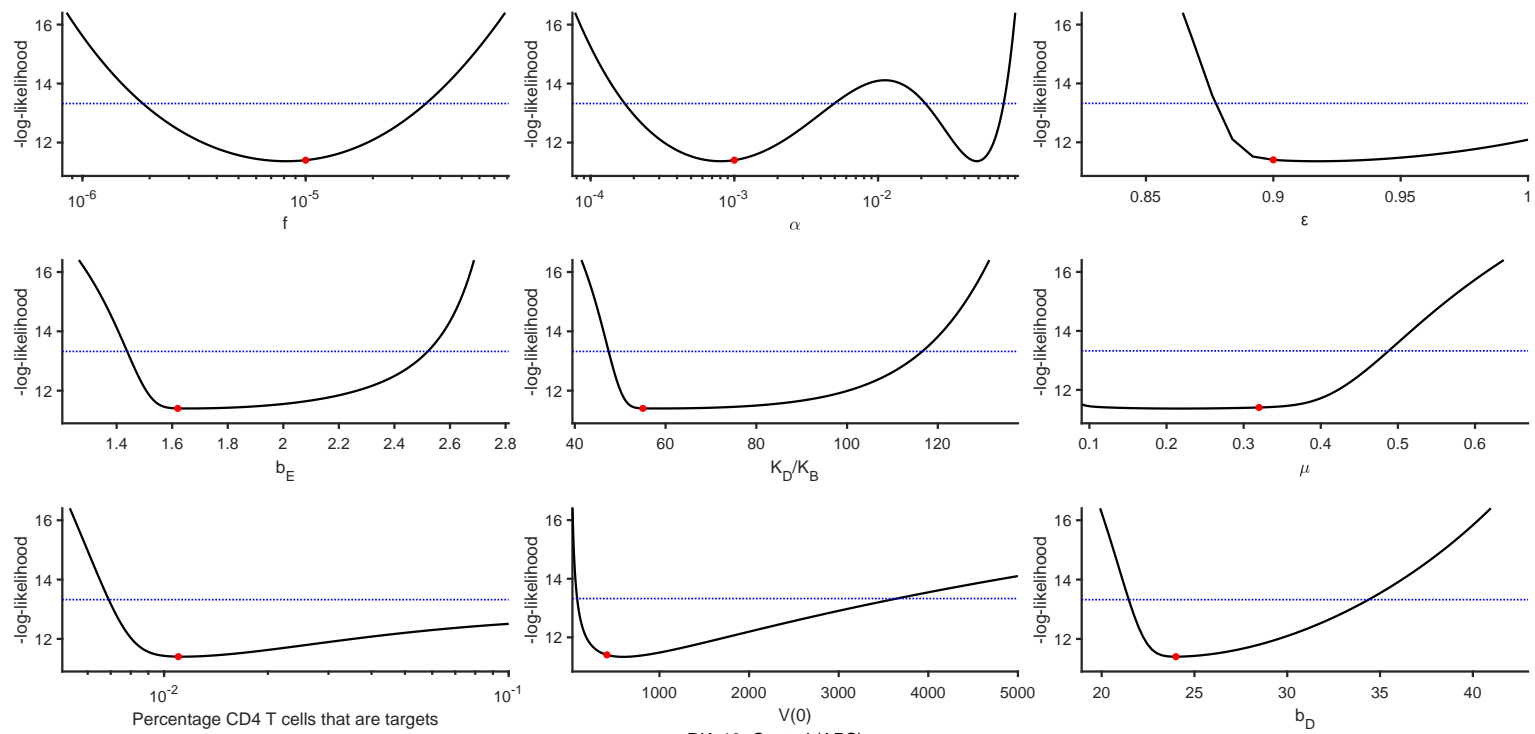

RKs13: Control (APS)

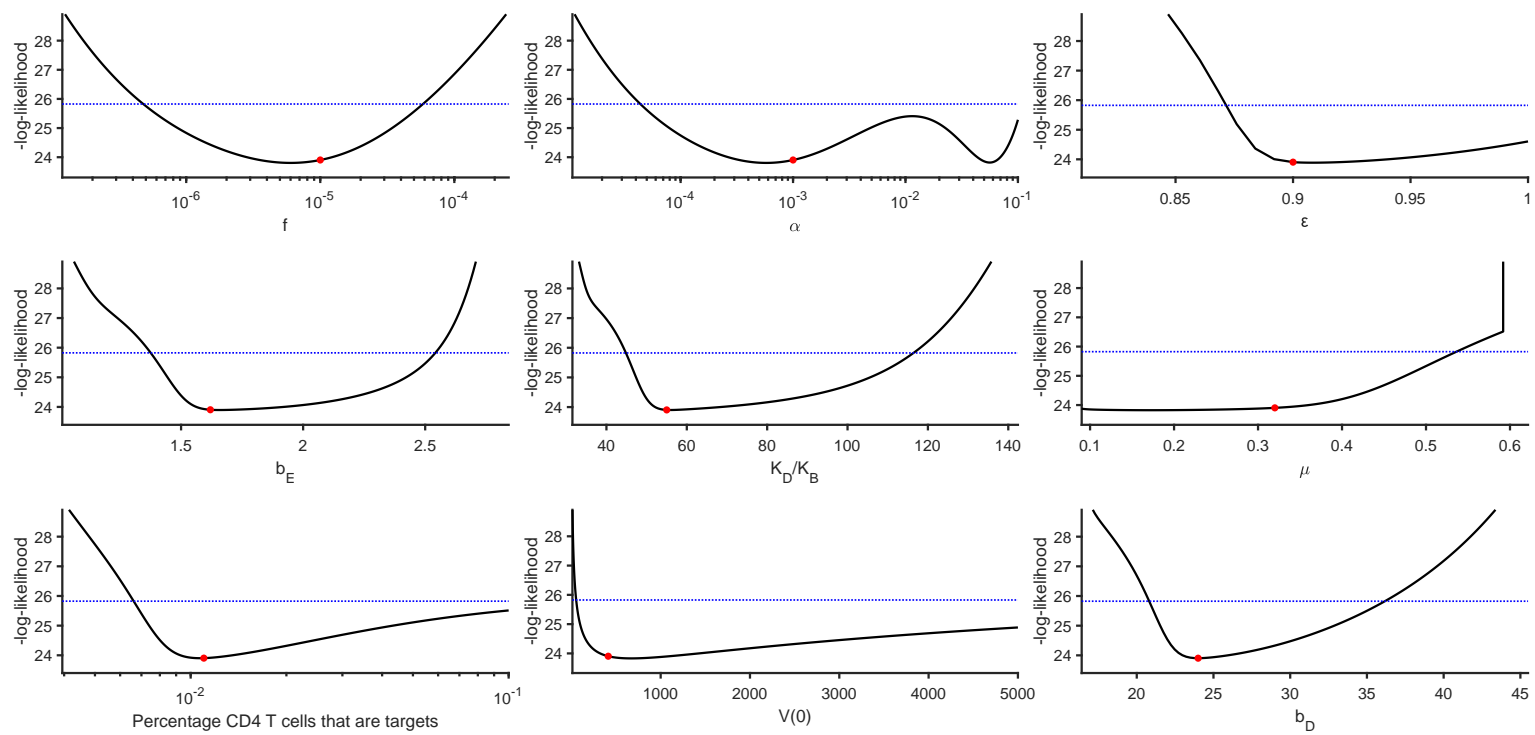

RSy13: Control (APS)

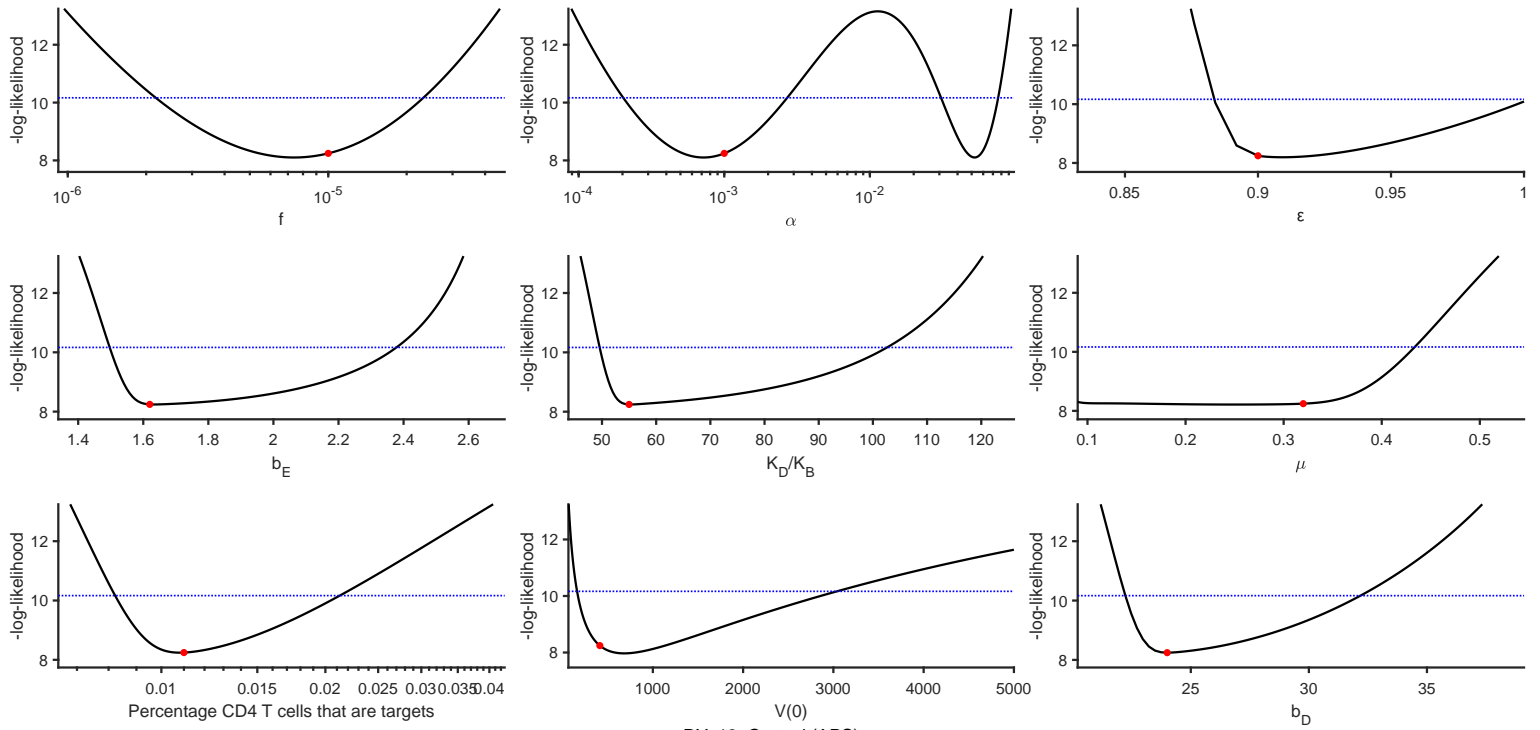

RyY13: Control (APS)

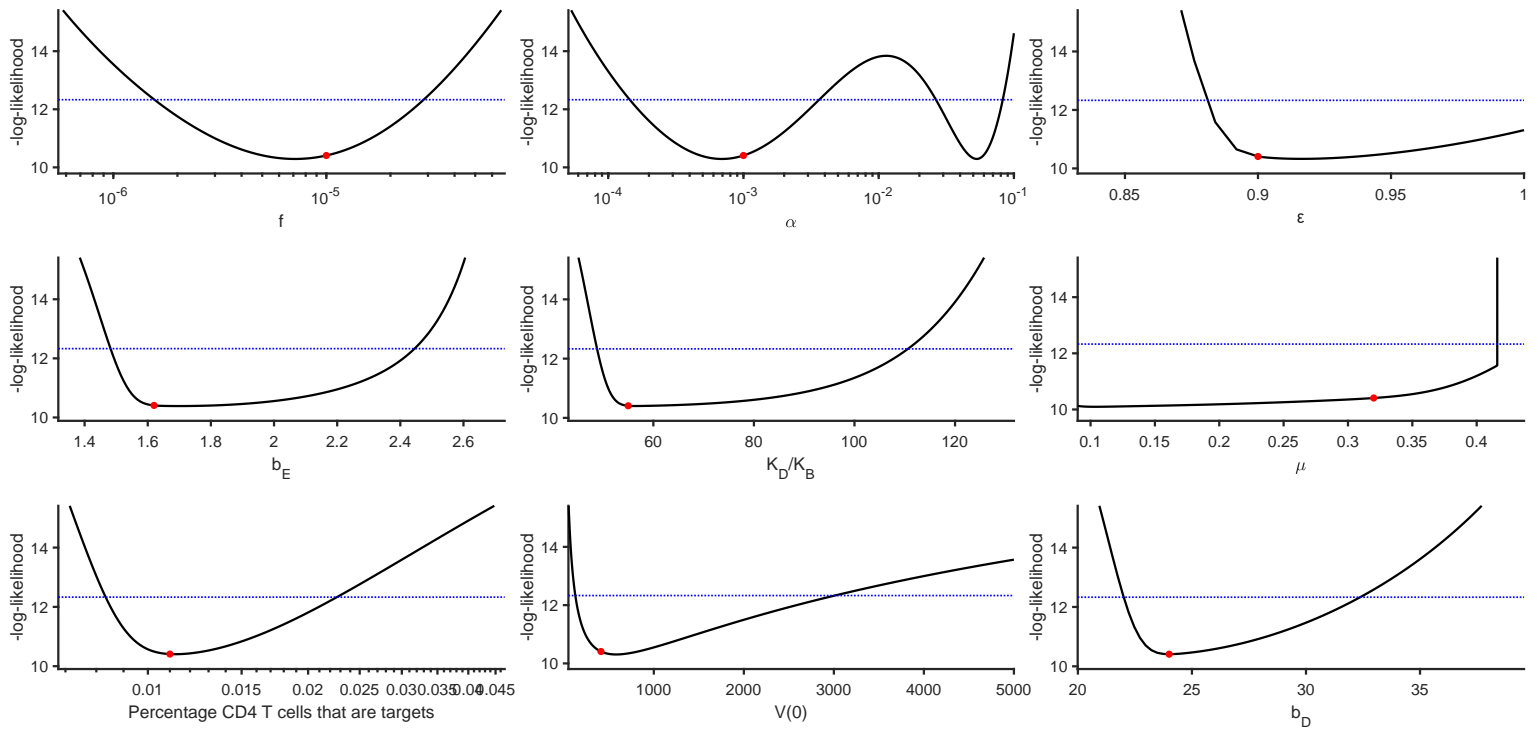



RL014: Control (APS)

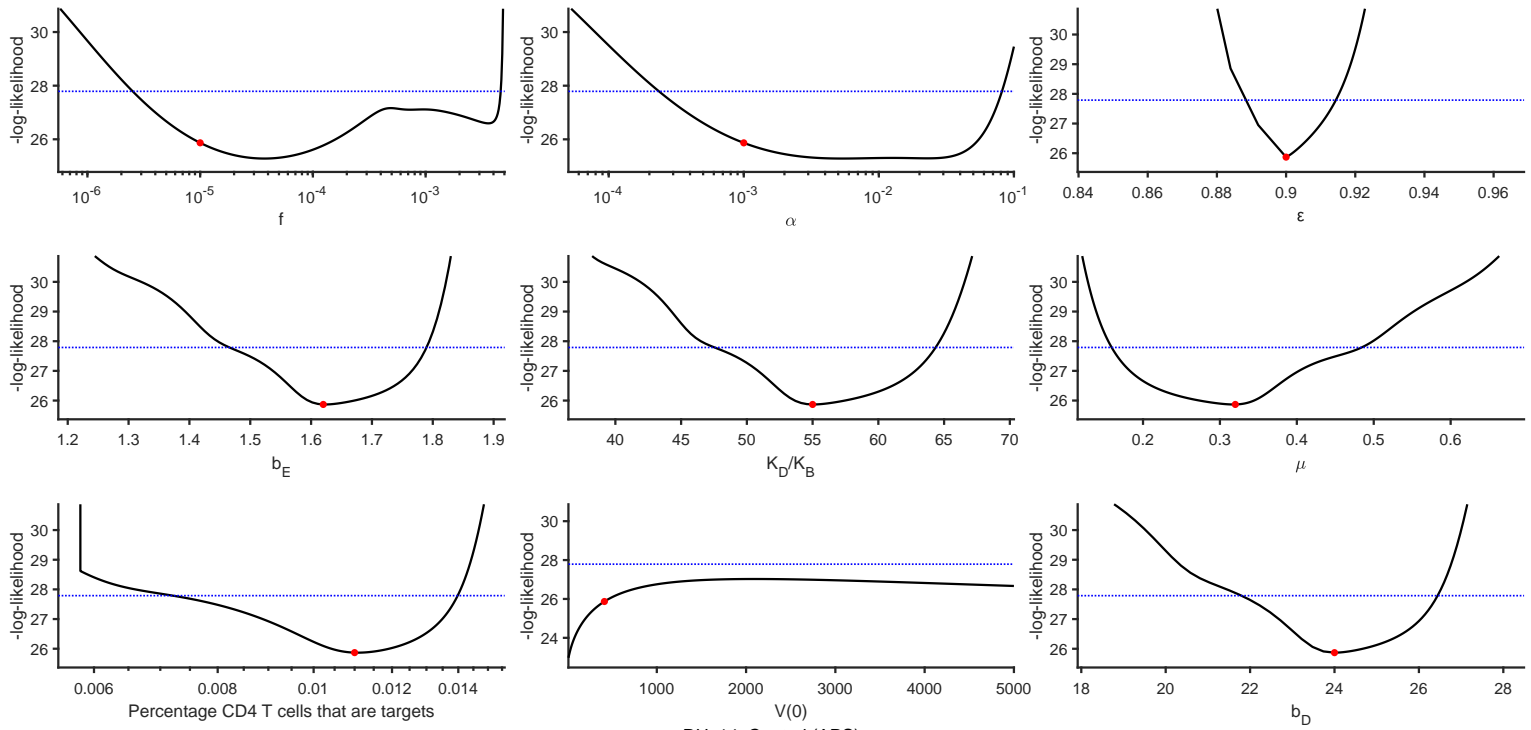

RU14: Control (APS)

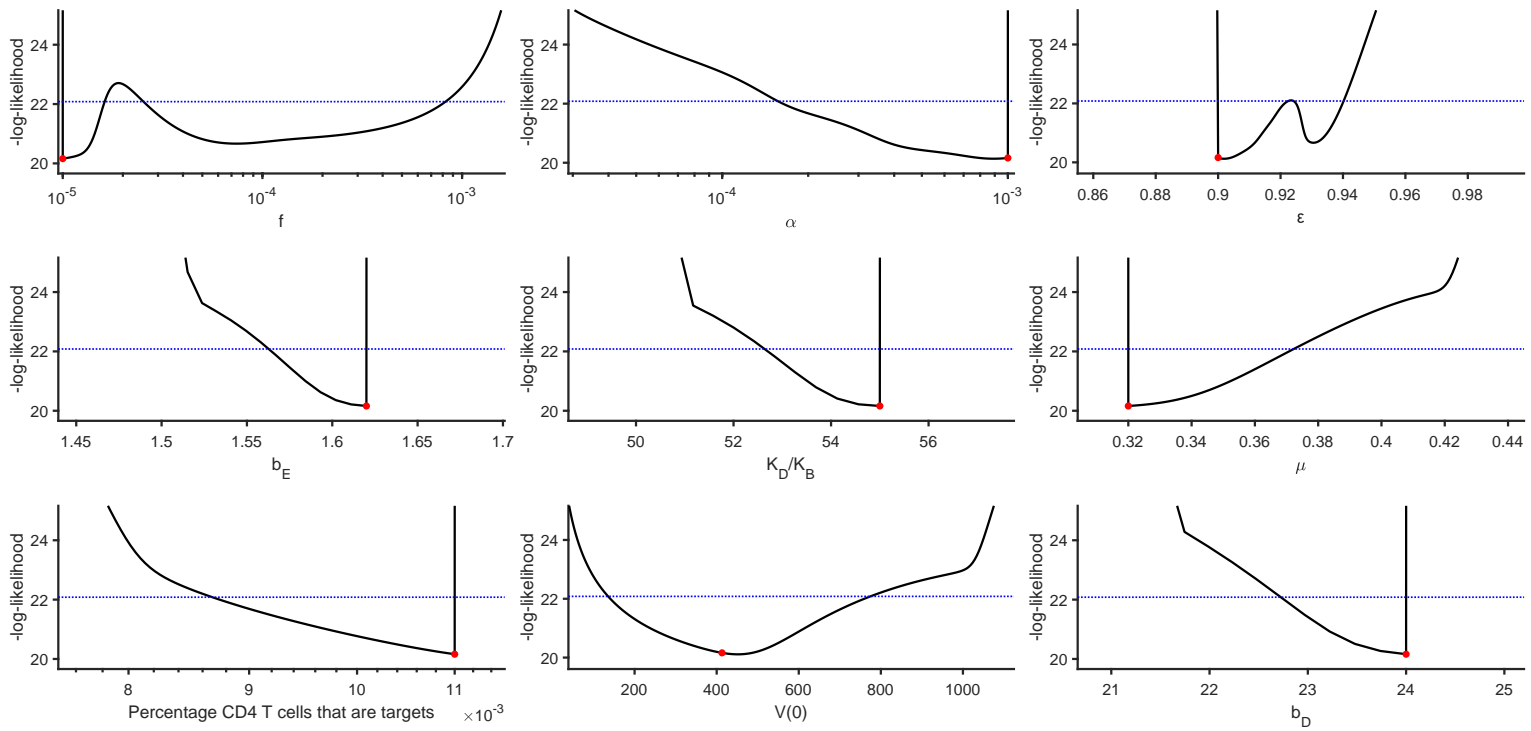

### 3 Likelihood profiles: Increased viral clearance

#### 3.1 Baseline effector cell source model

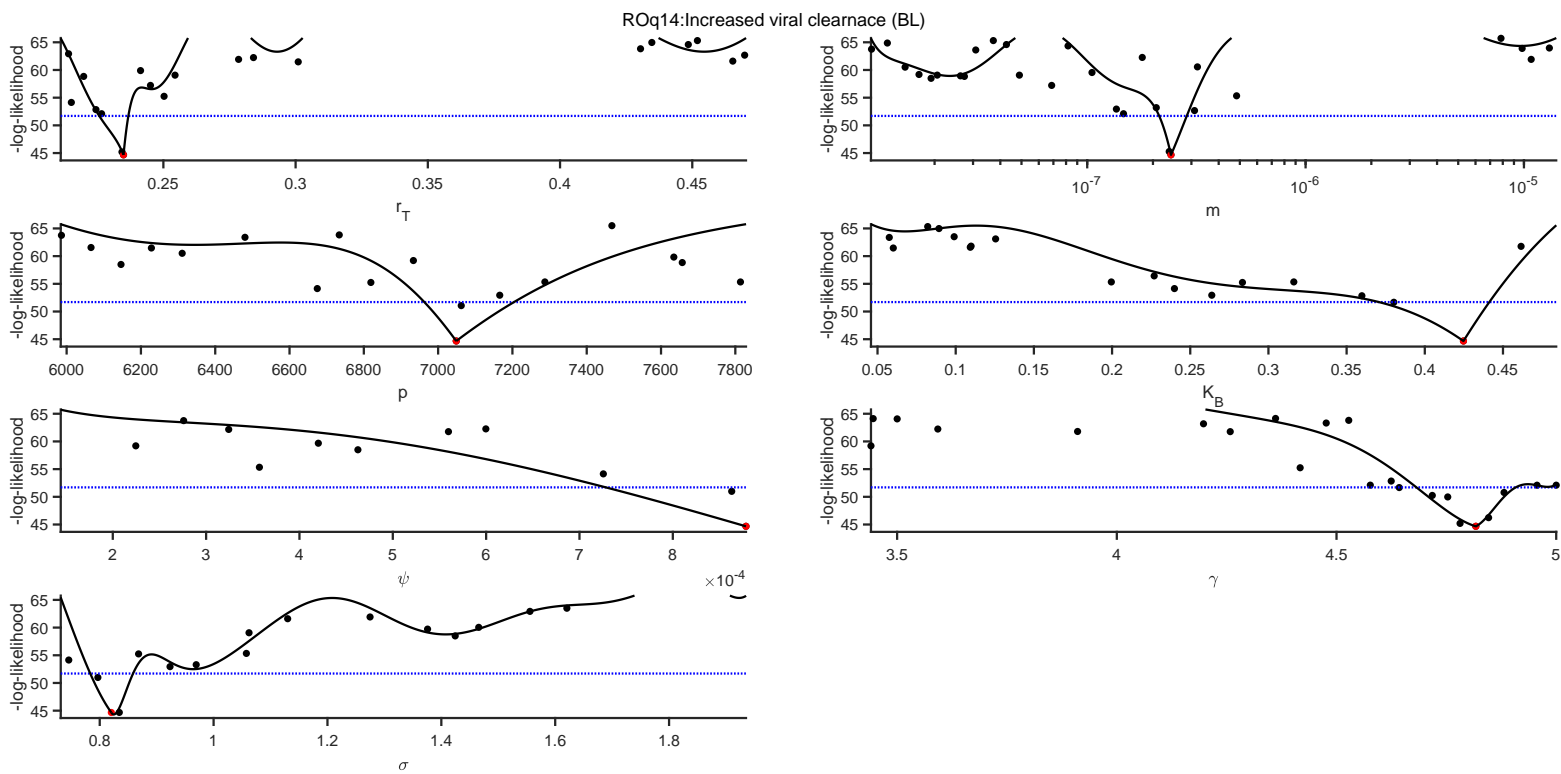

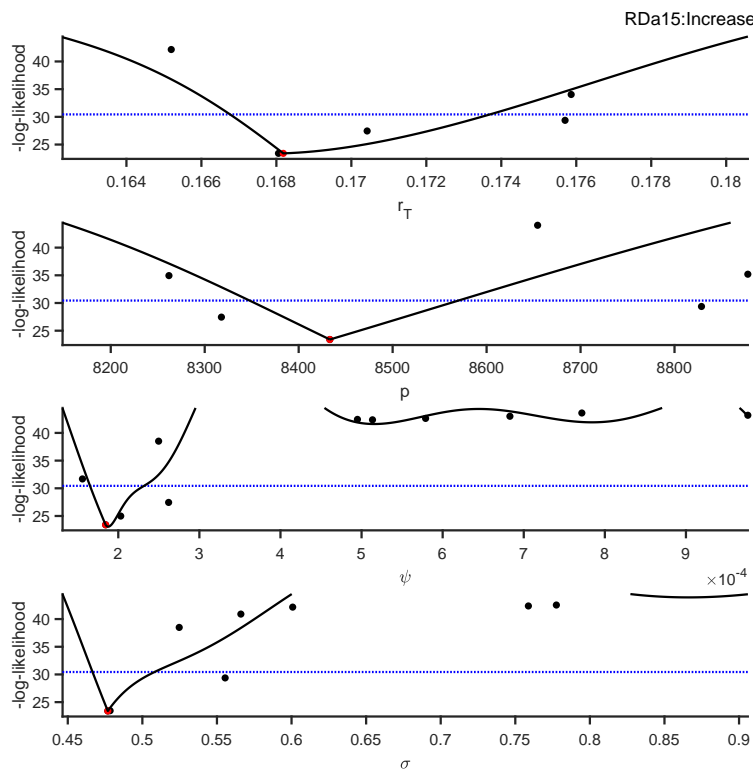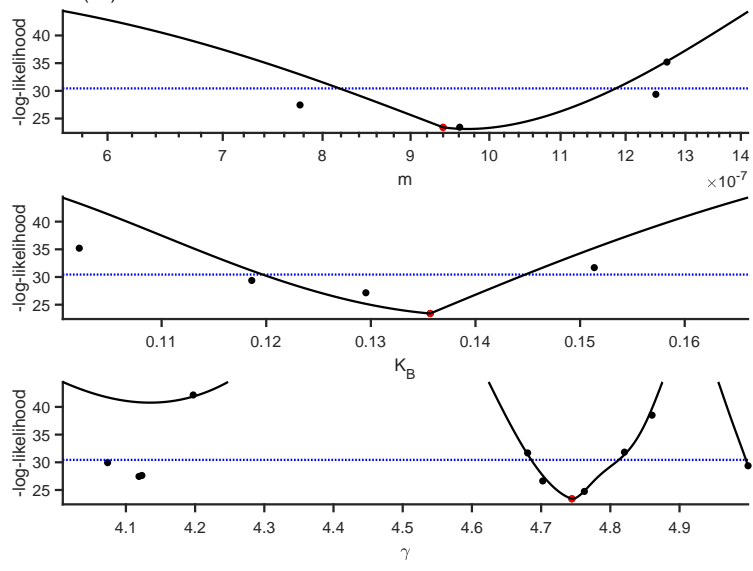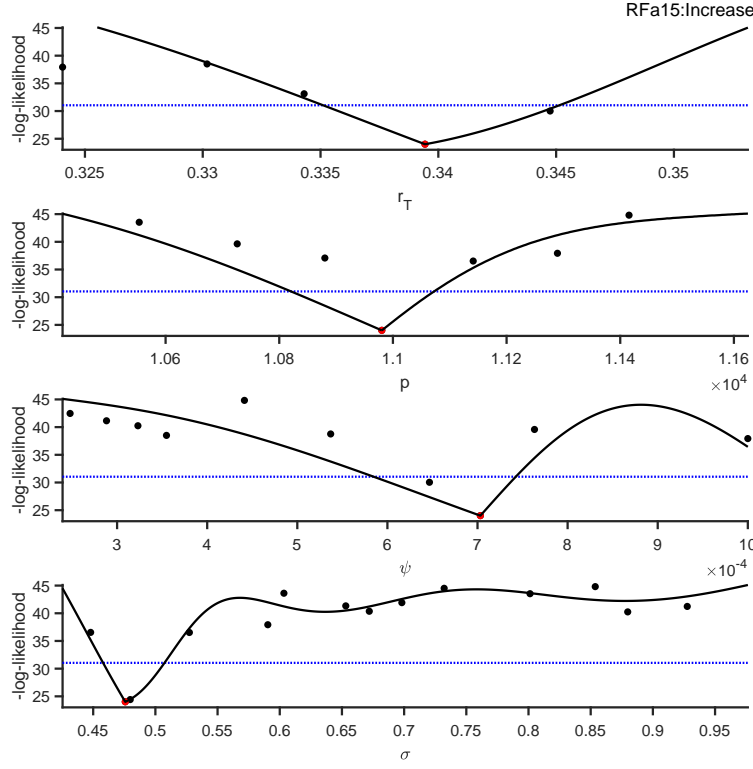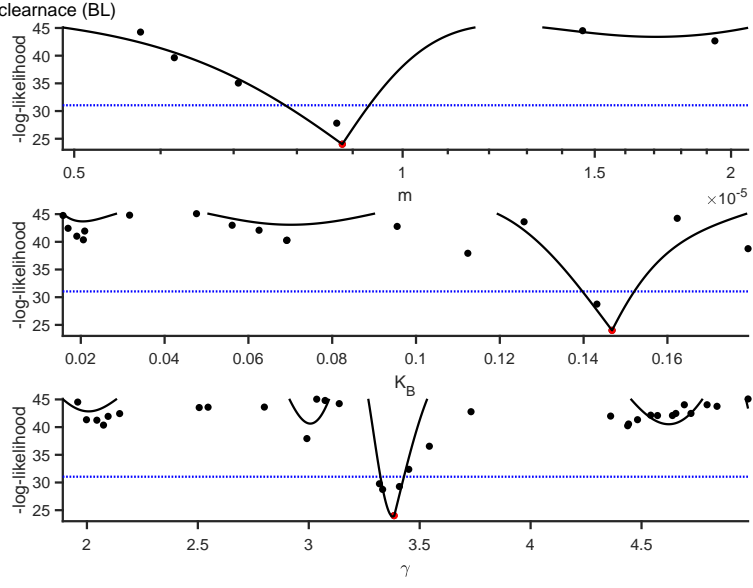

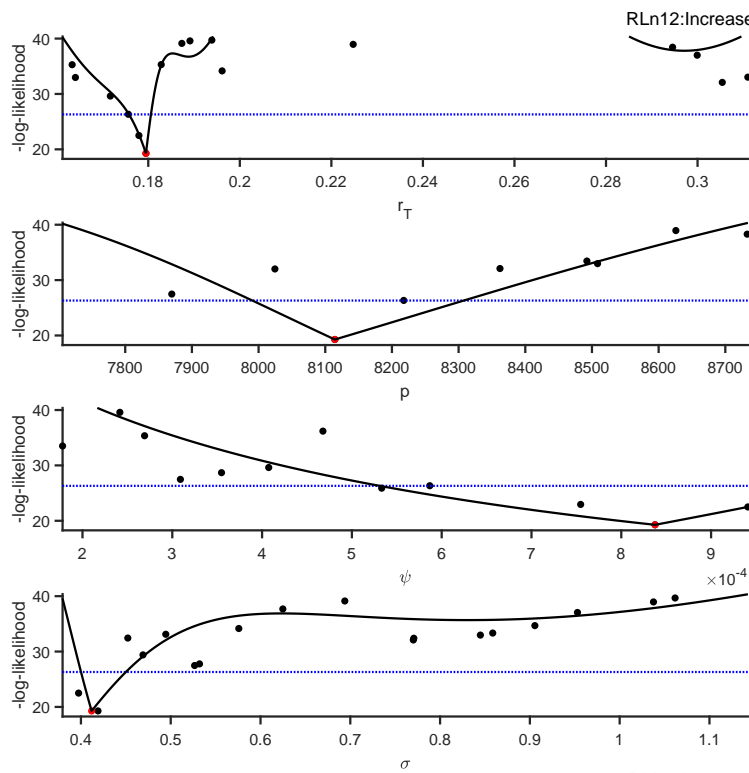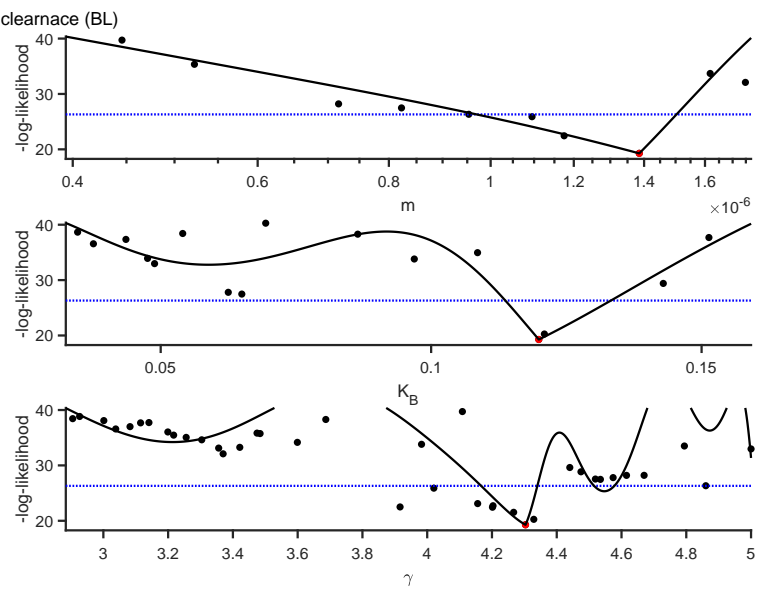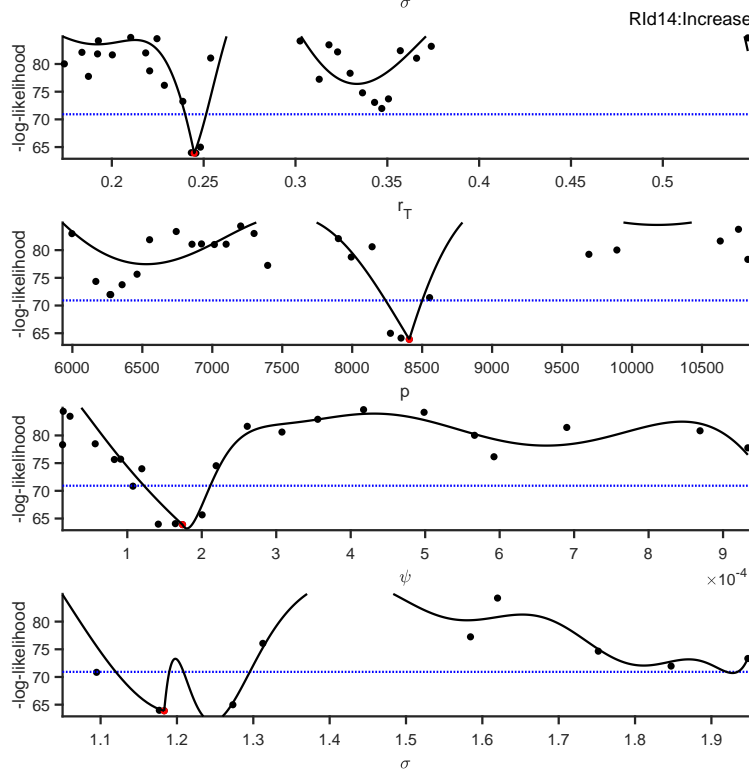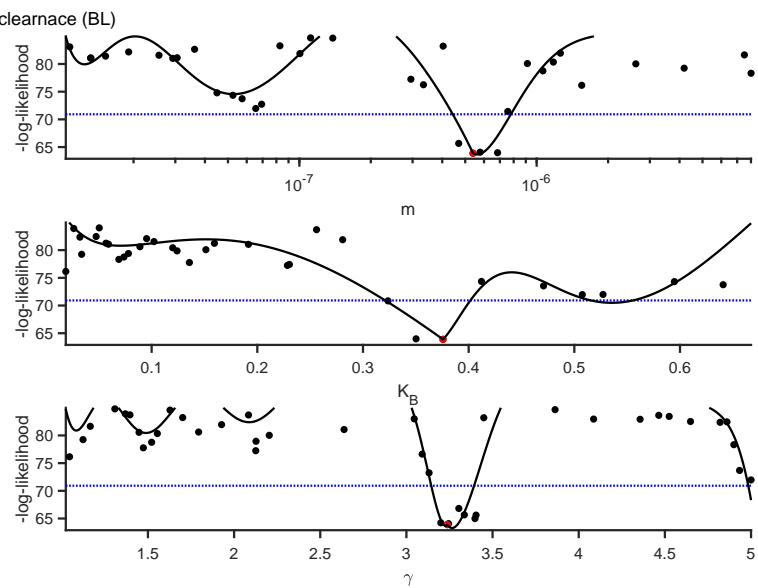

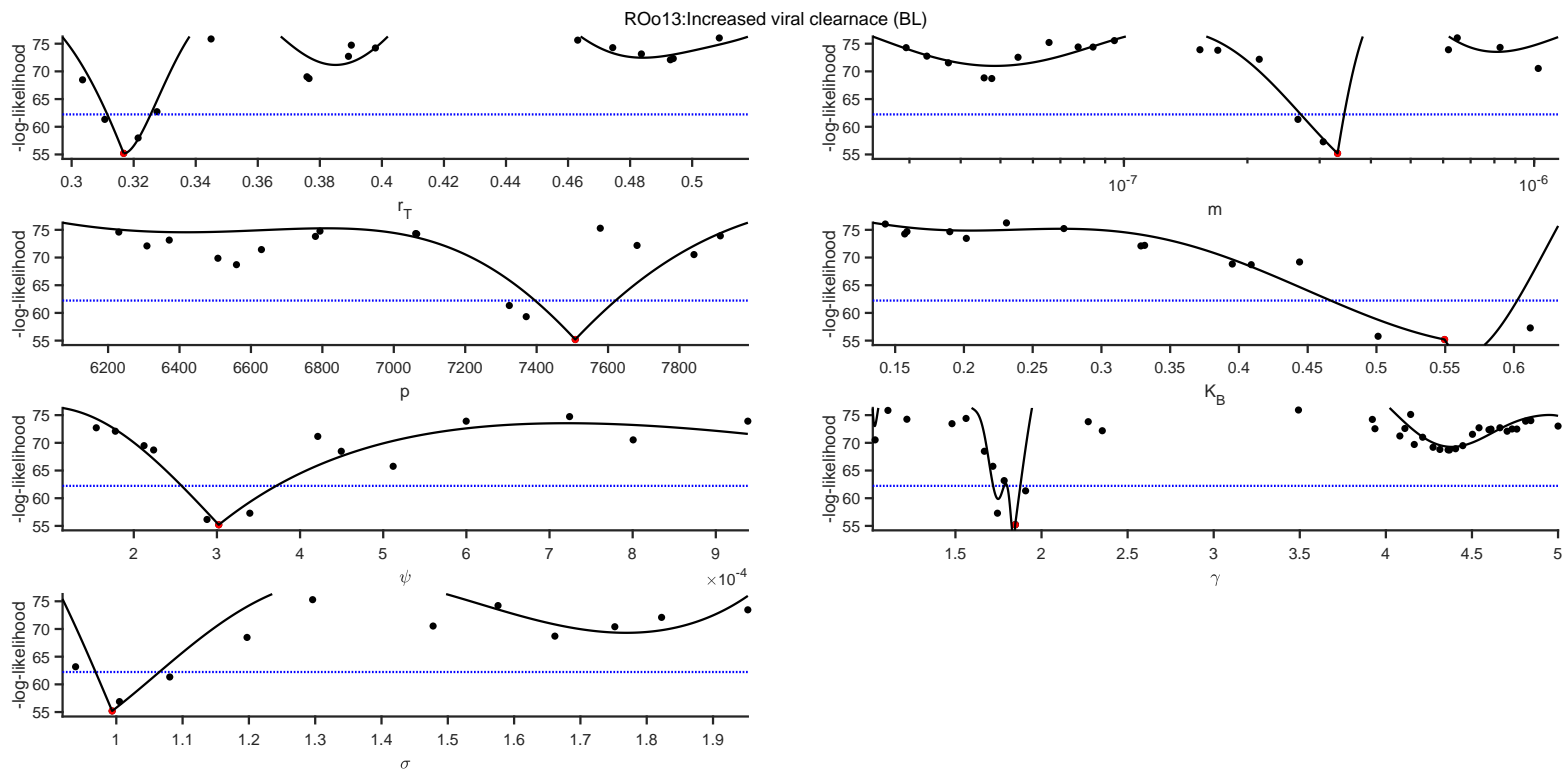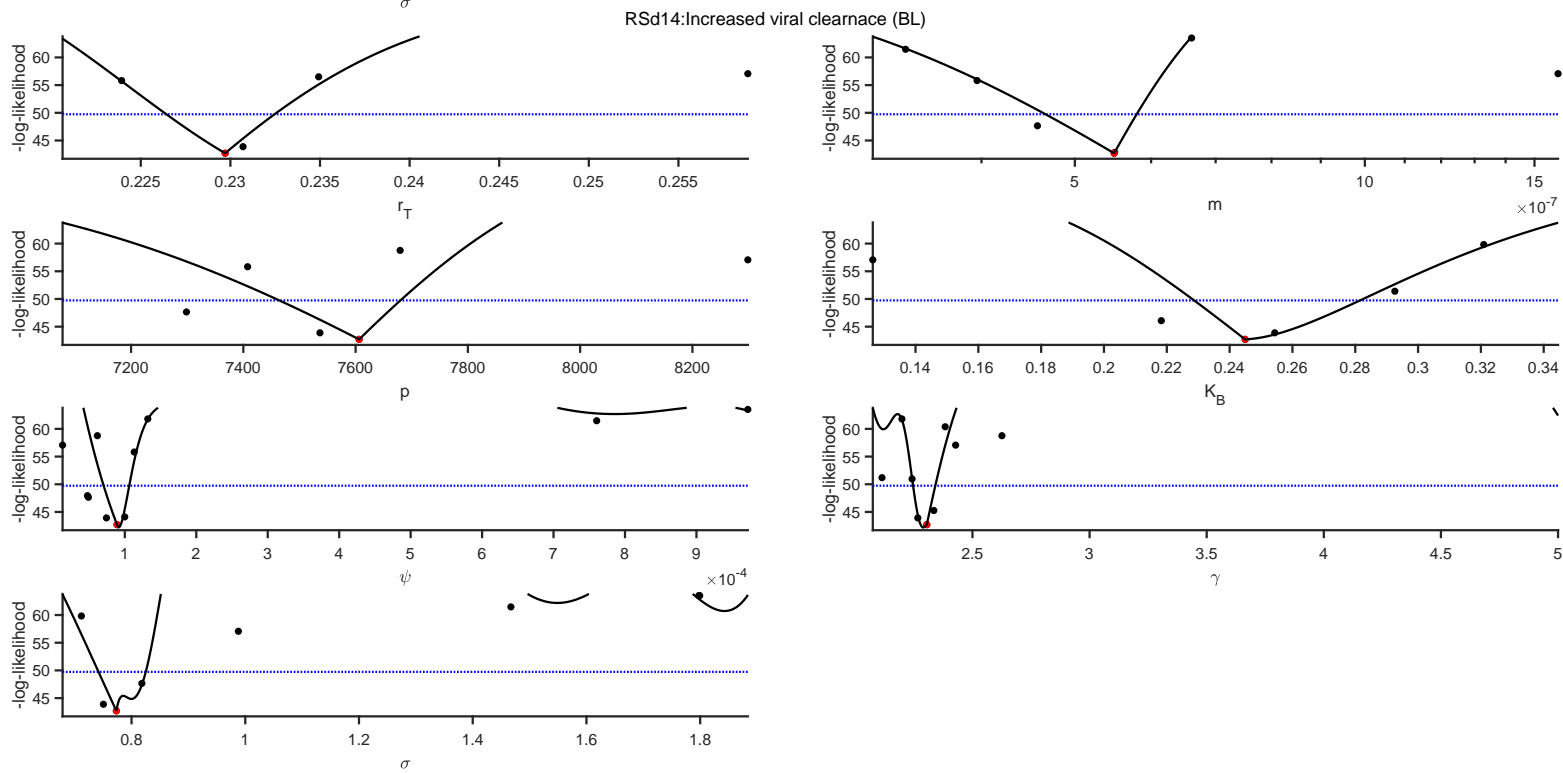

ROv14: Increased viral clearance (BL)

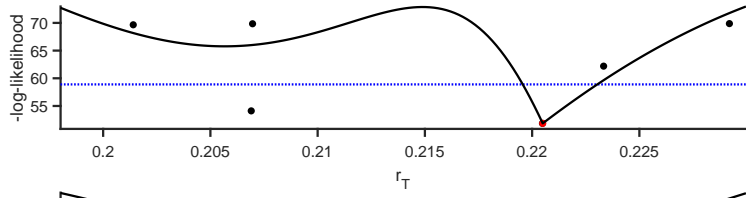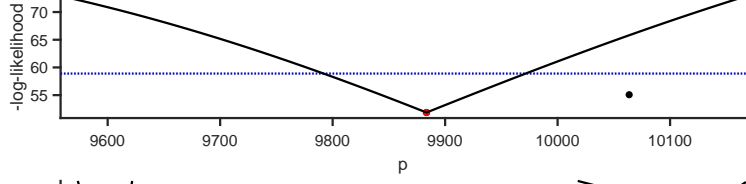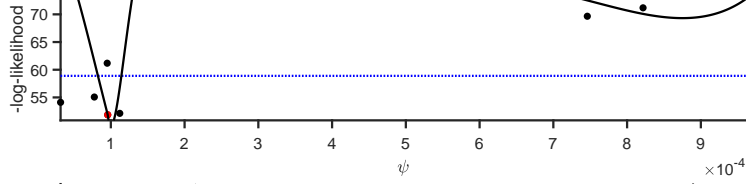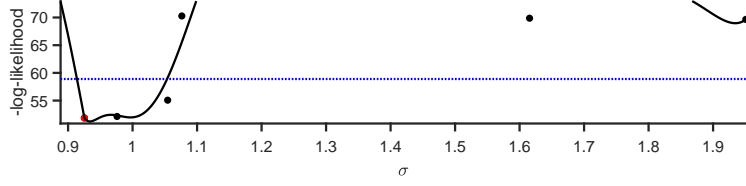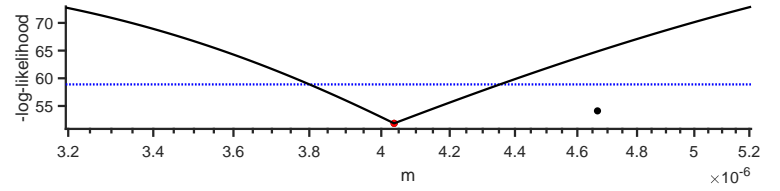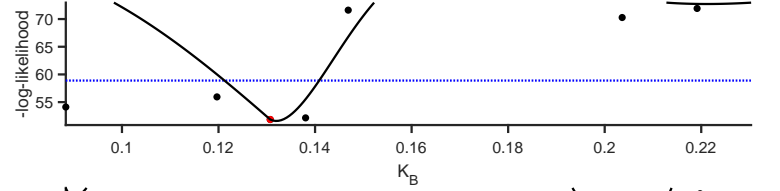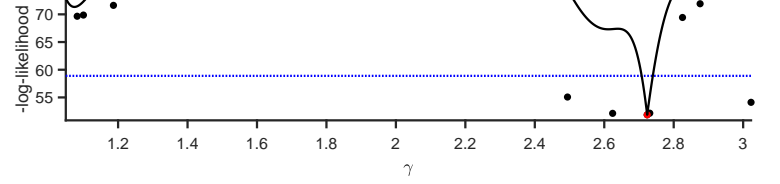

## 3.2 Saturated effector cell source model

ROq14: Increased viral clearance (SS)

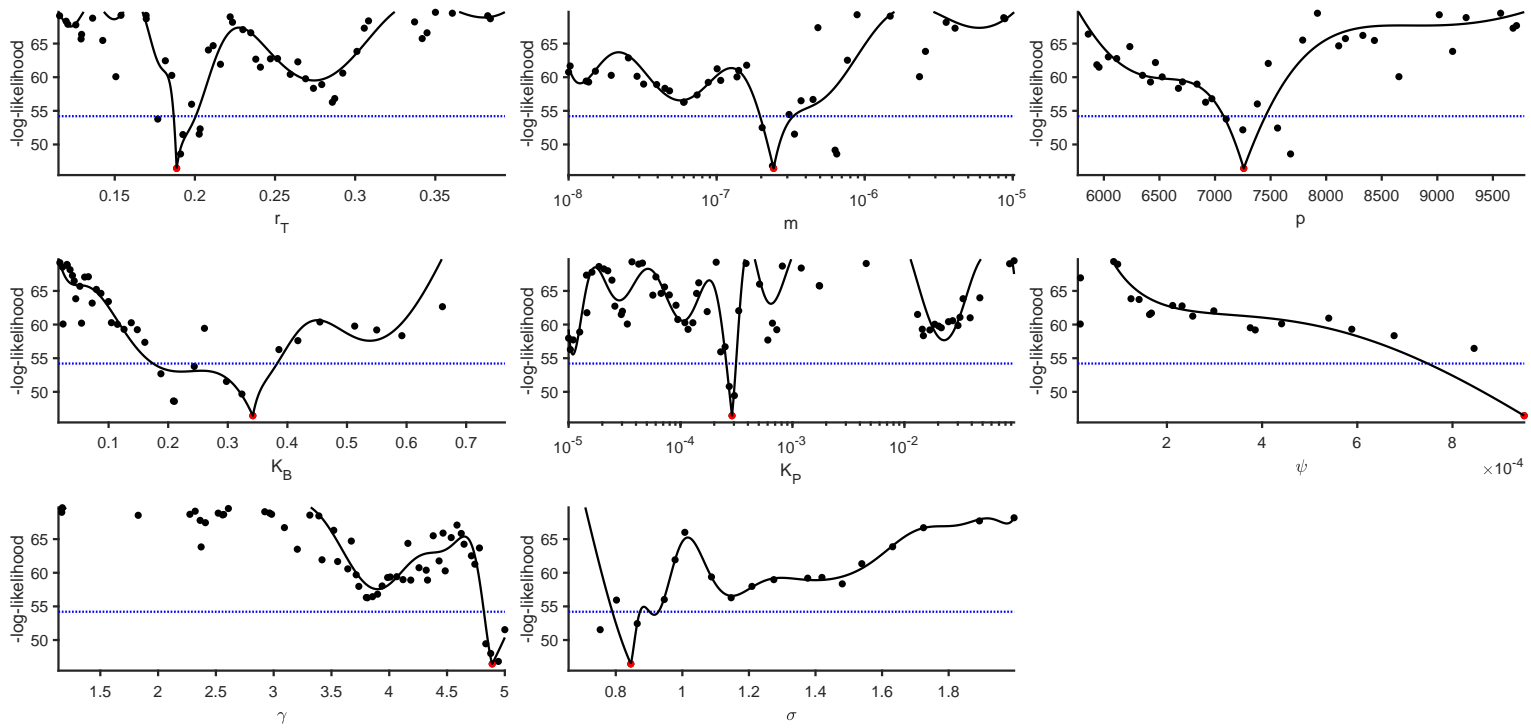

RDa15: Increased viral clearance (SS)

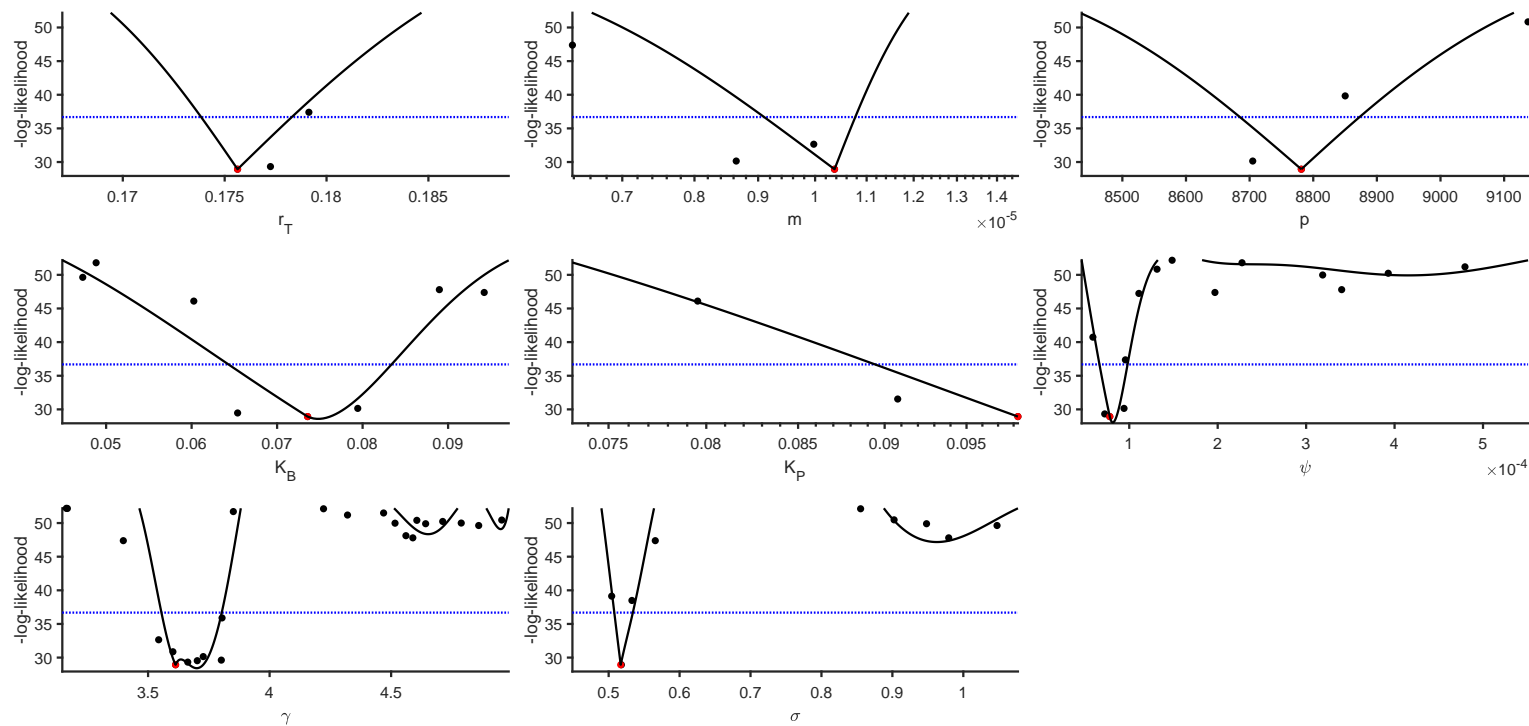

RFa15: Increased viral clearance (SS)

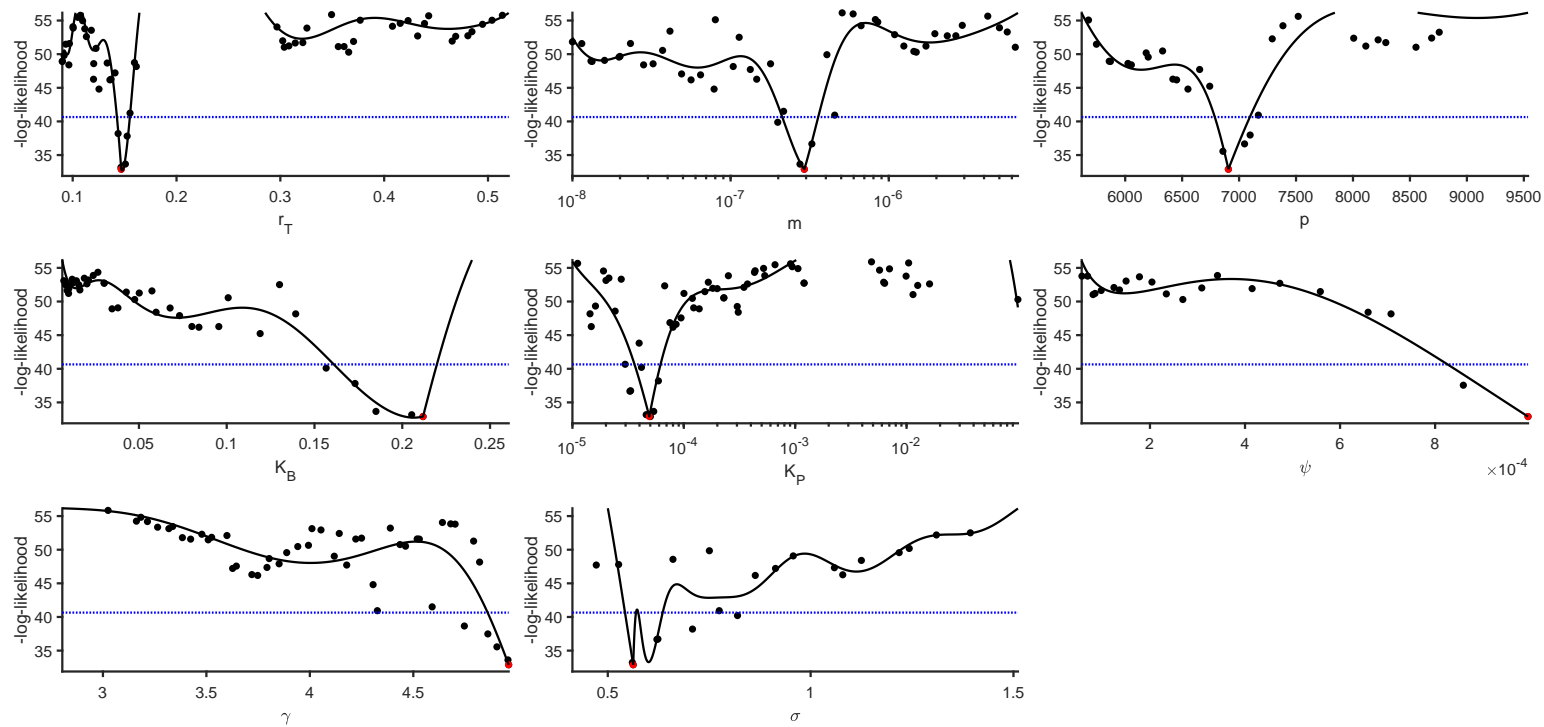



RLn12: Increased viral clearance (SS)

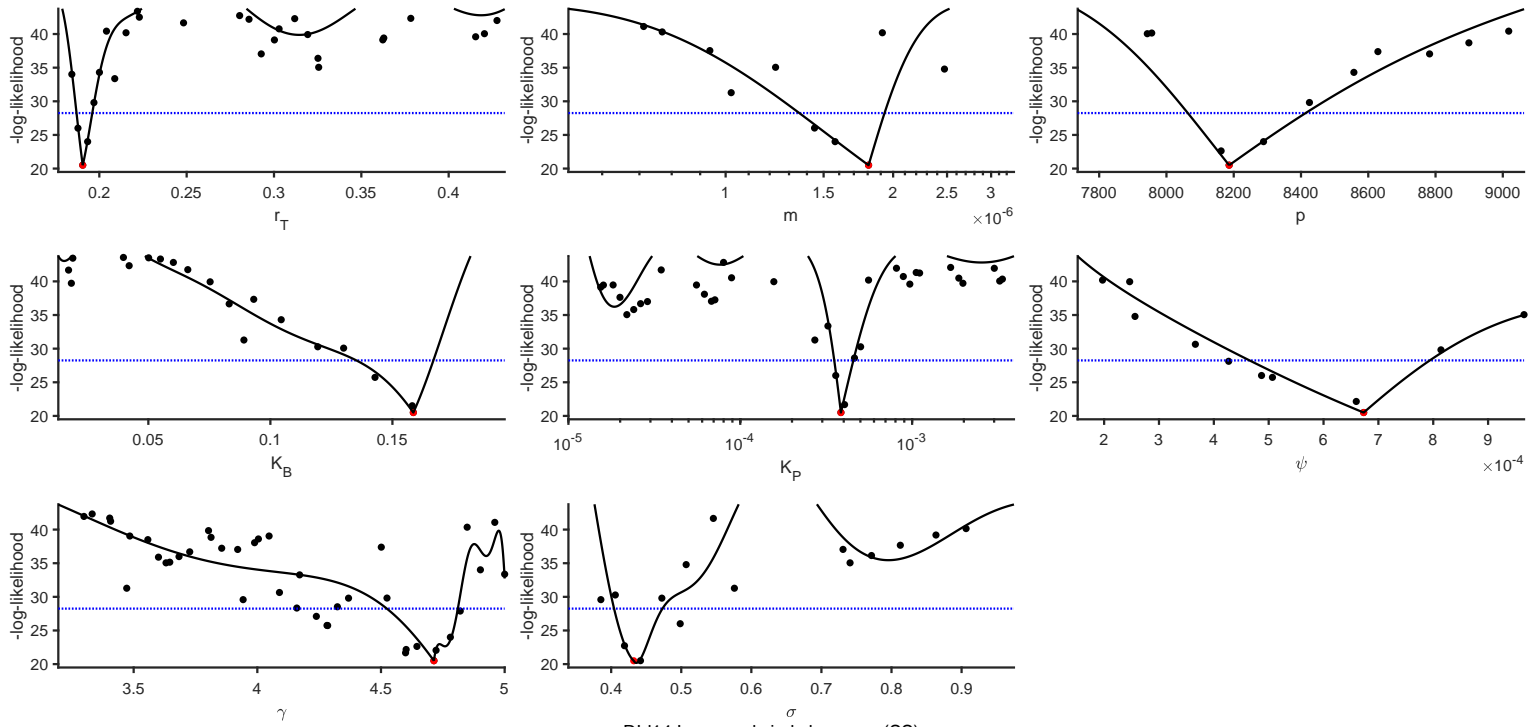

RId14: Increased viral clearance (SS)

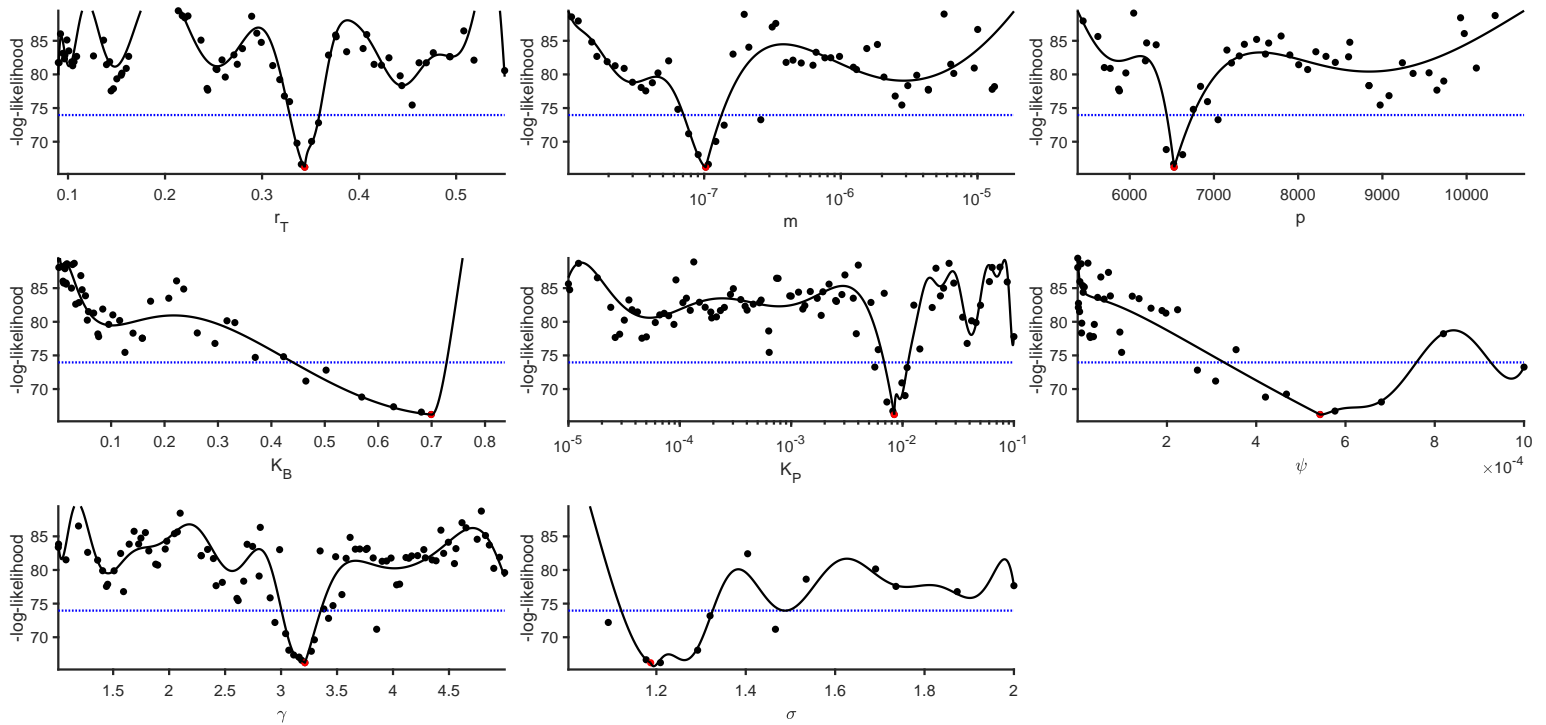

ROo13:Increased viral clearance (SS)

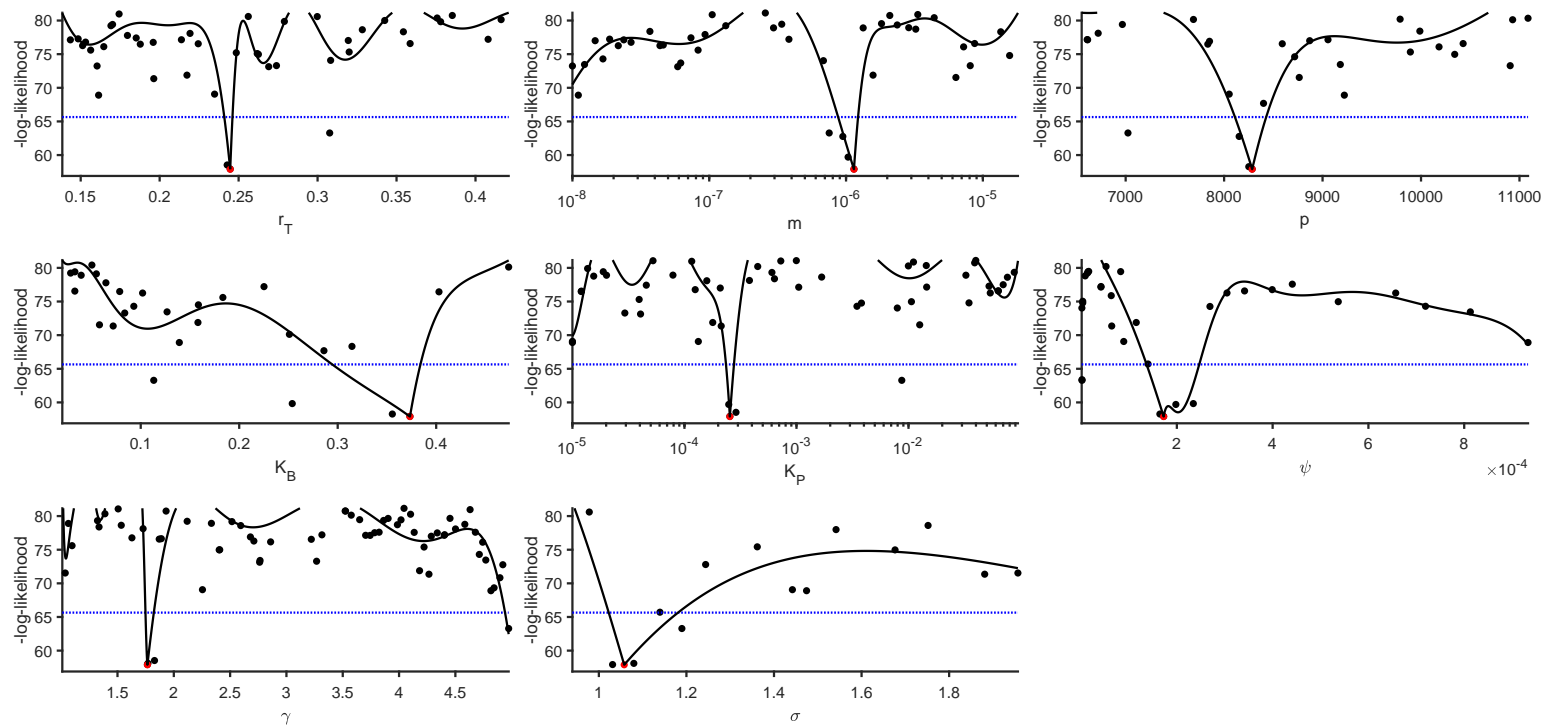

RSd14:Increased viral clearance (SS)

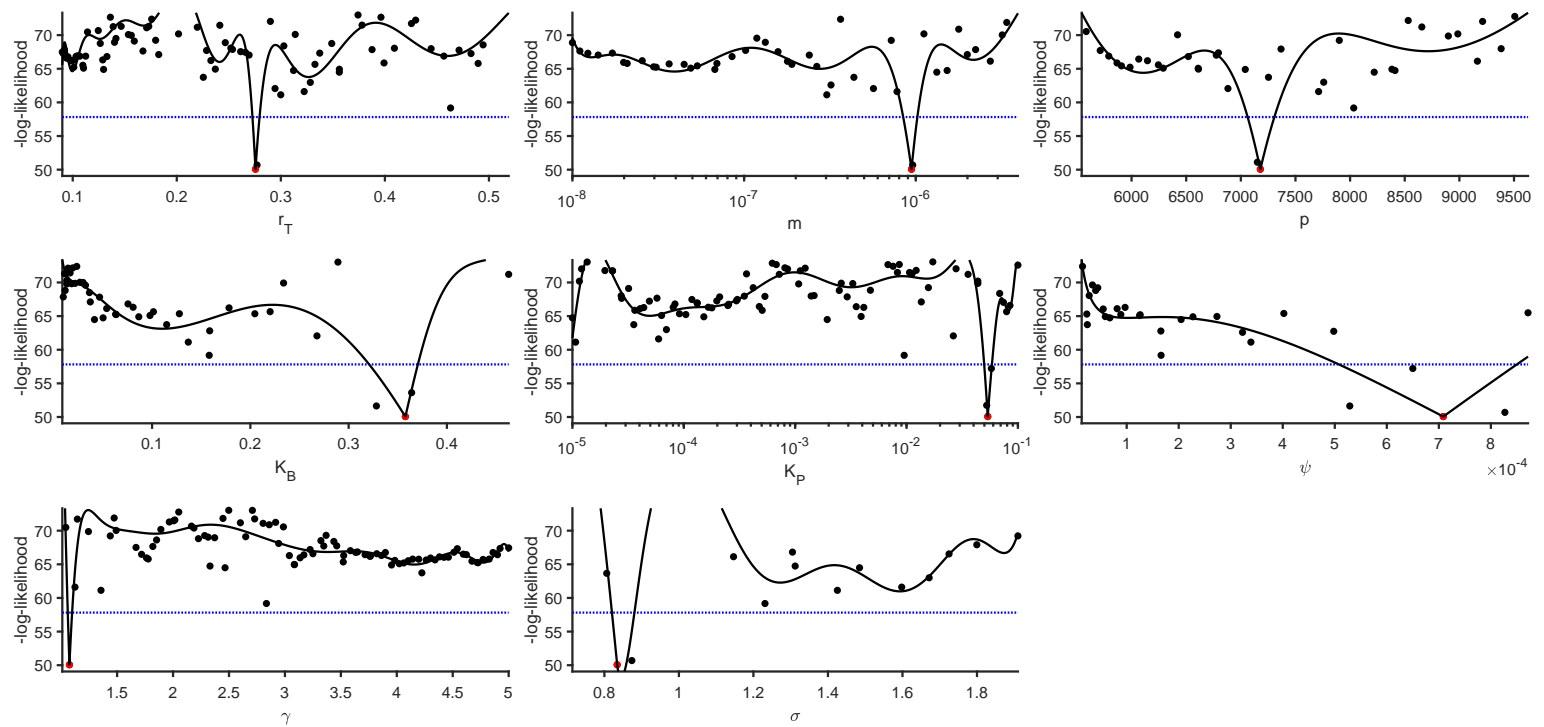

ROv14: Increased viral clearance (SS)

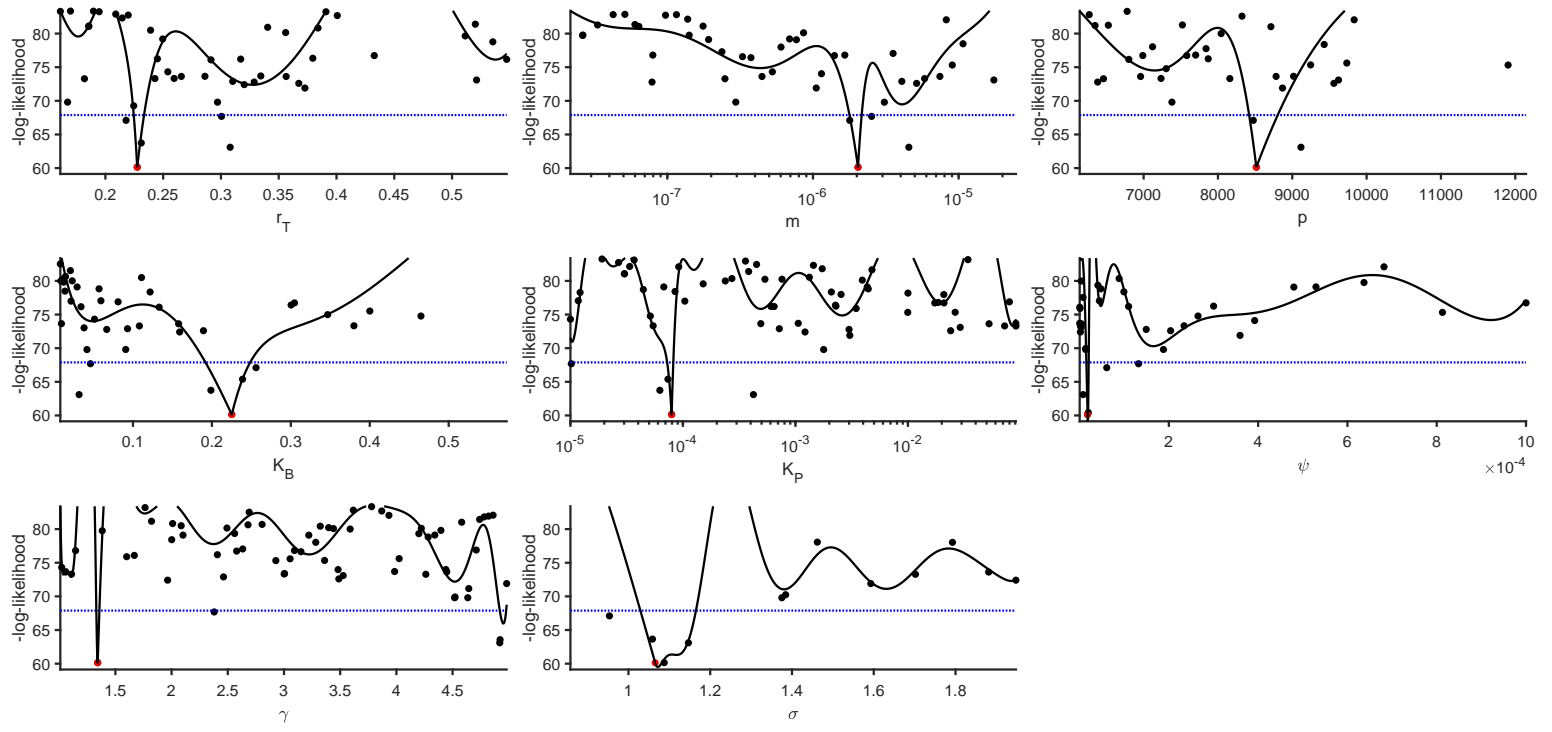

### 3.3 Antigen presenting cell effector cell source model

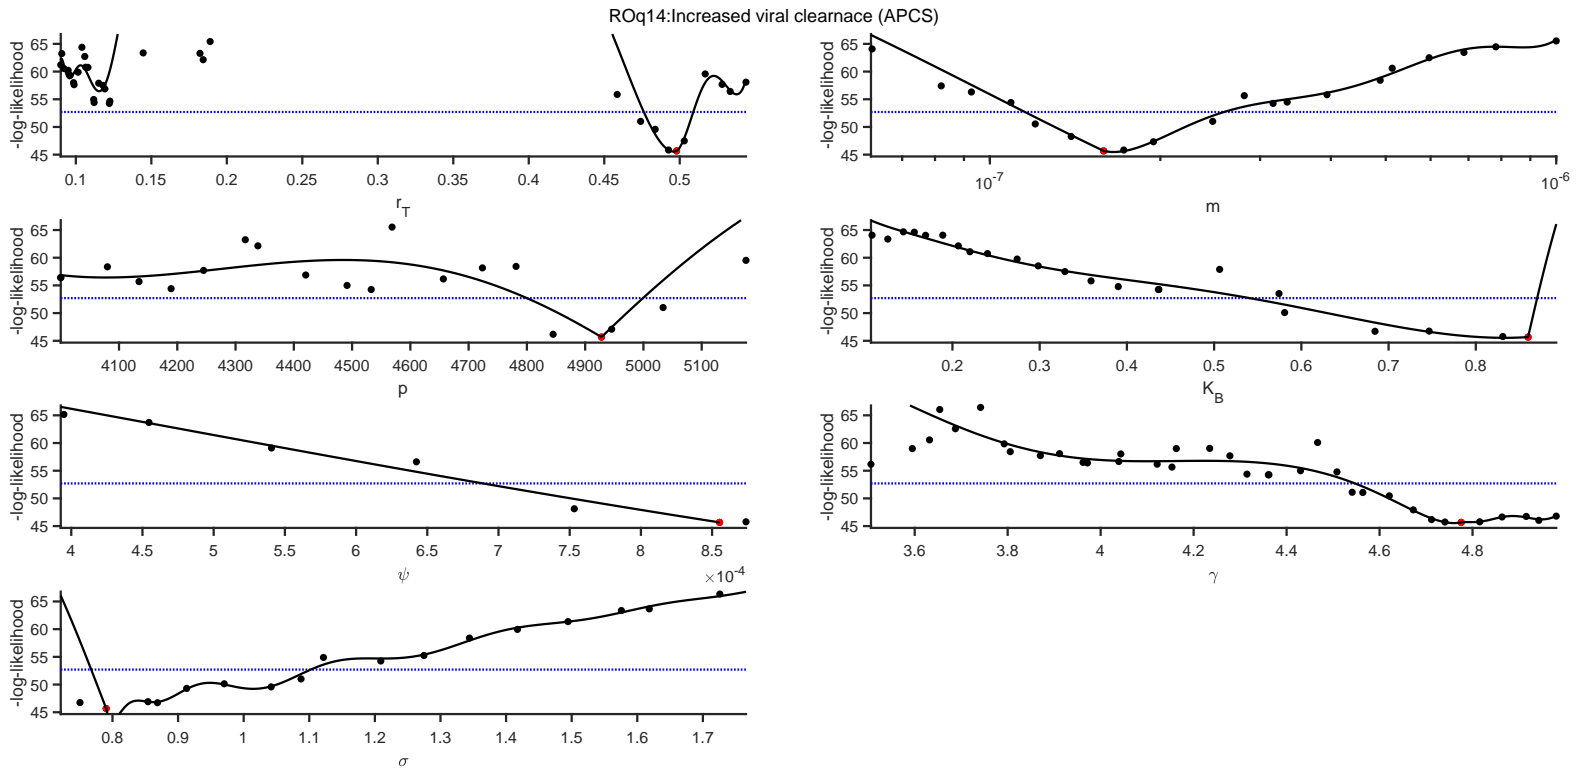

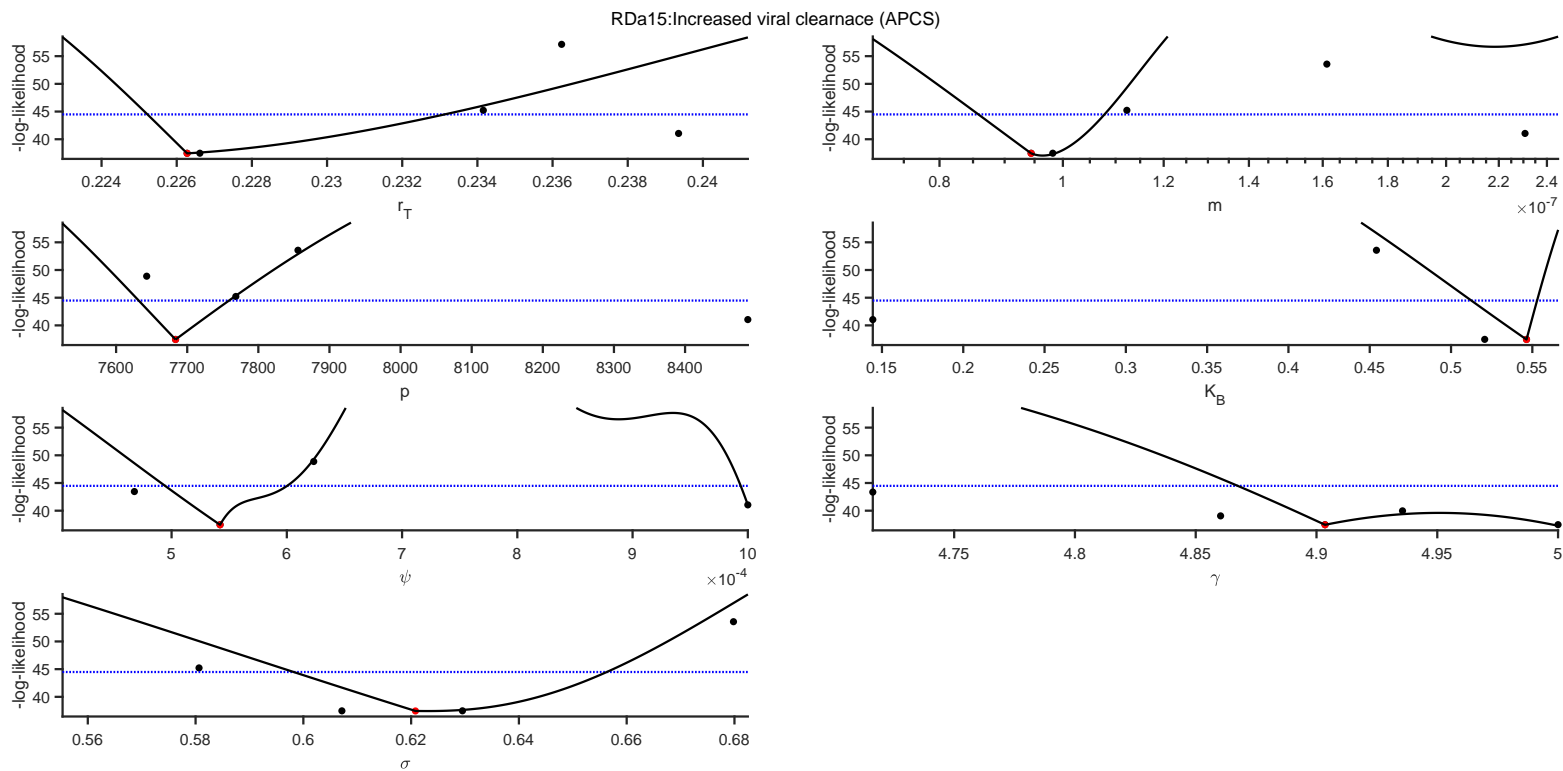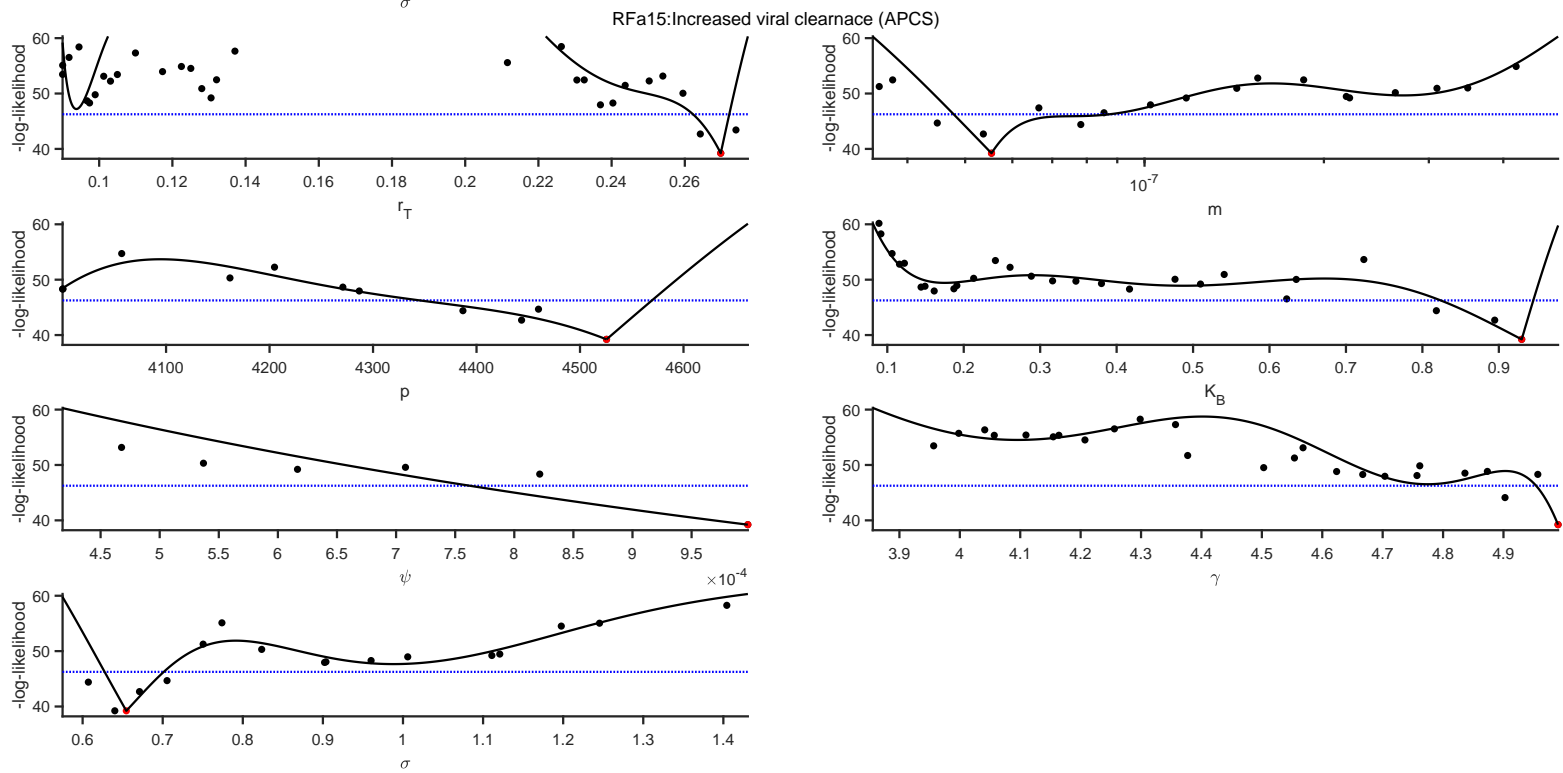

RLn12:Increased viral clearance (APCS)

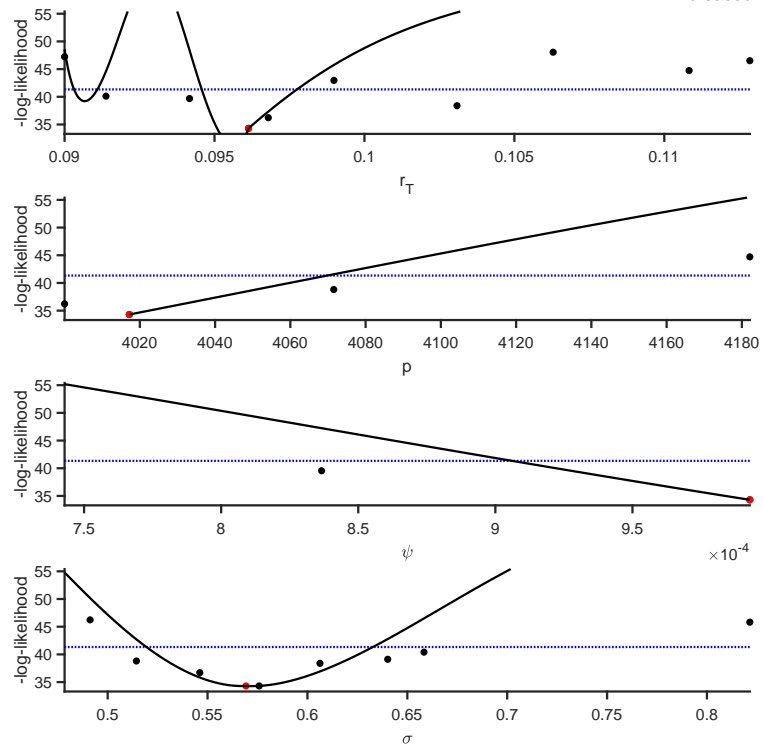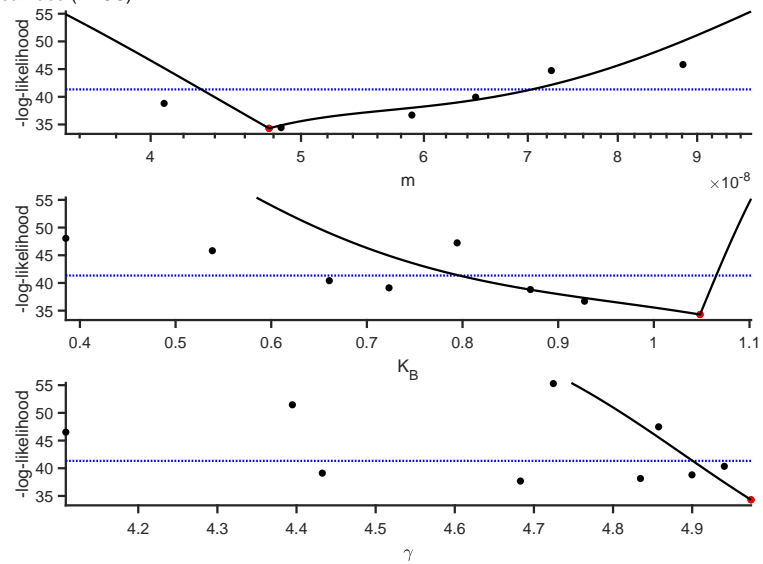

RId14:Increased viral clearance (APCS)

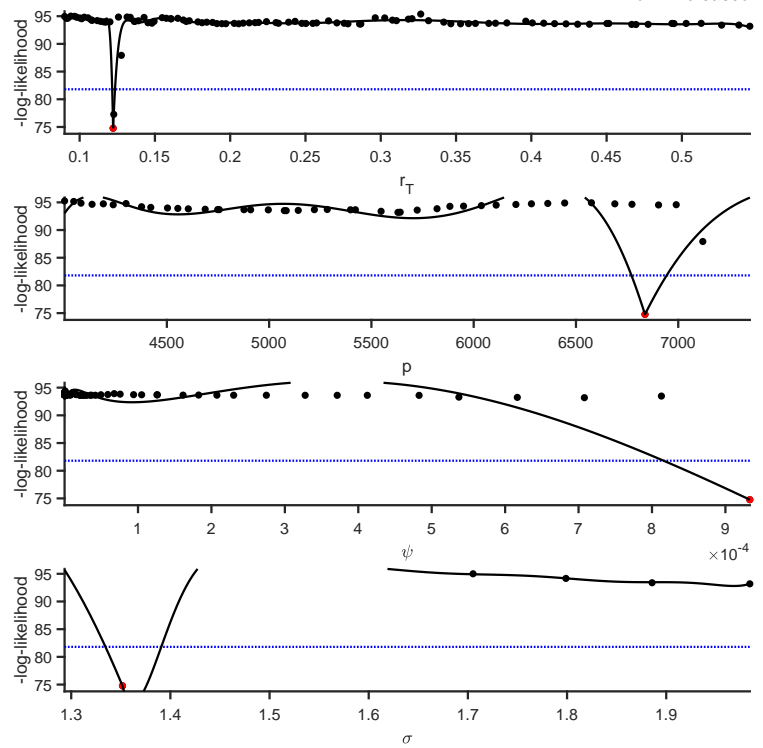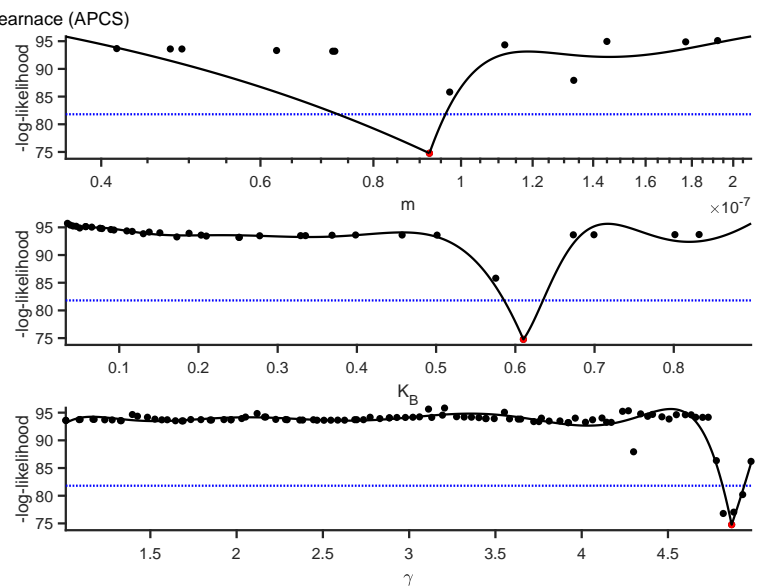

ROo13: Increased viral clearance (APCS)

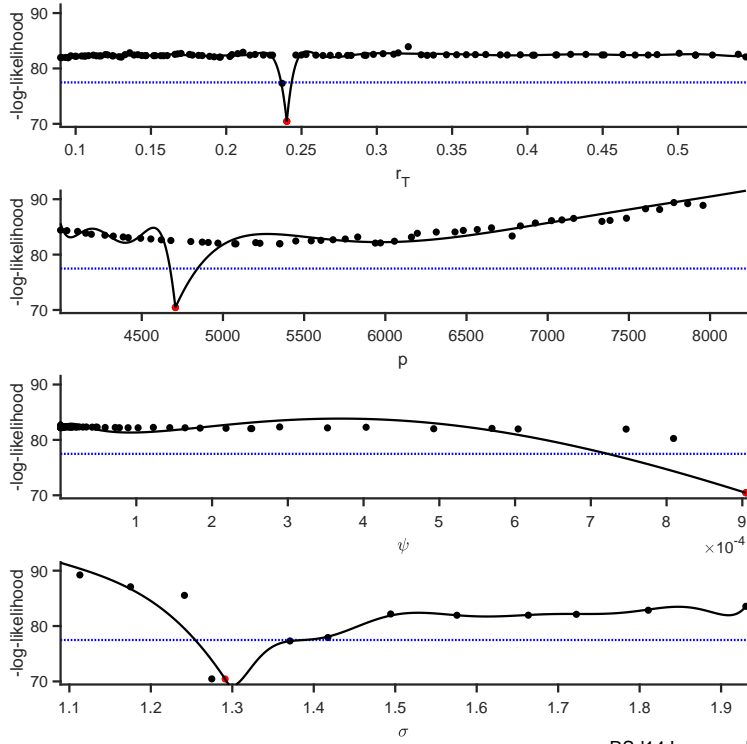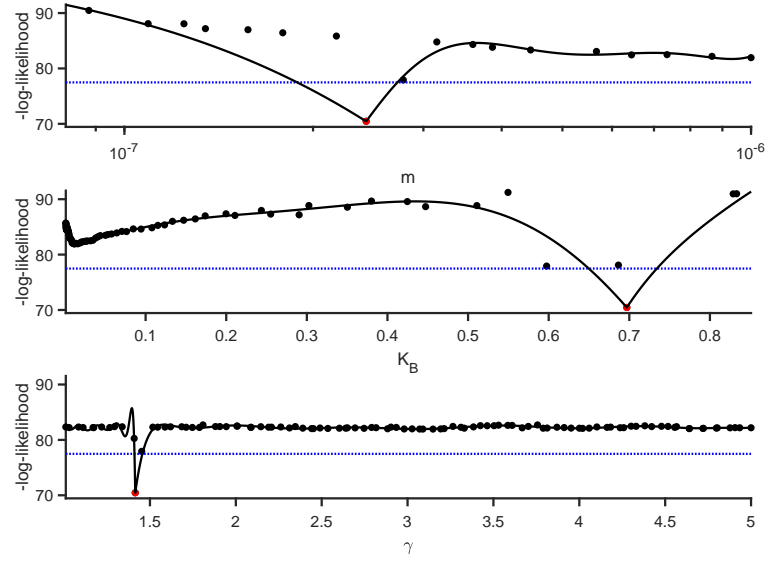

RSd14: Increased viral clearance (APCS)

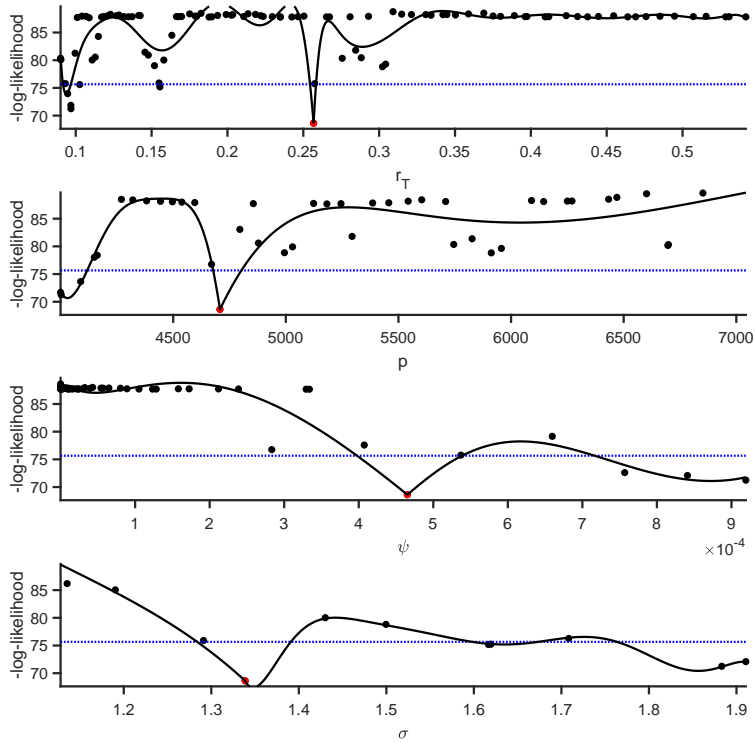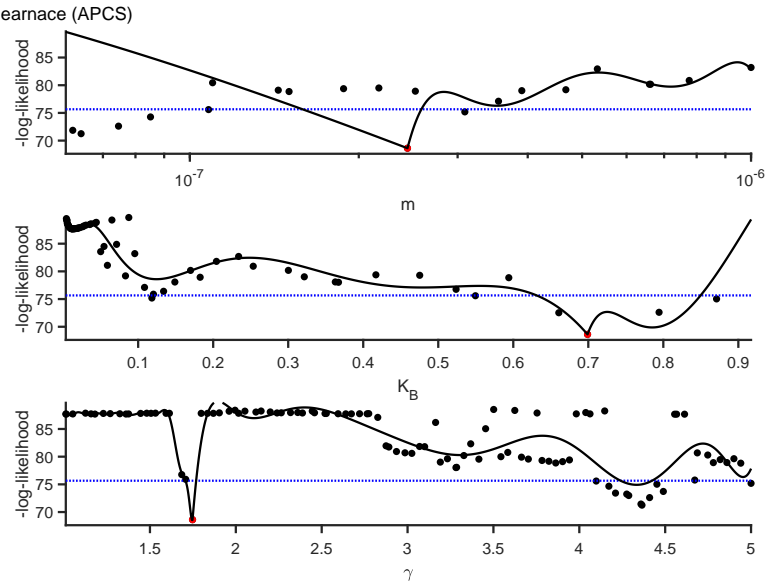

ROv14: Increased viral clearance (APCS)

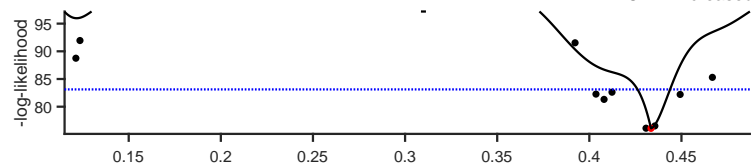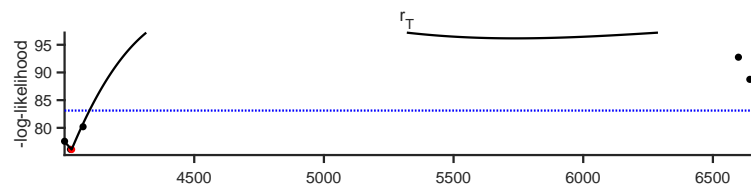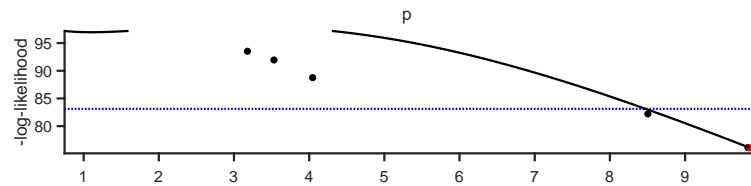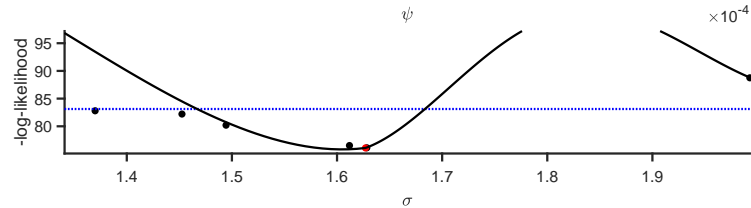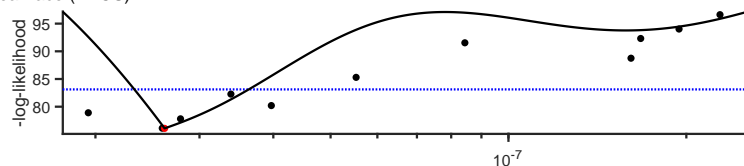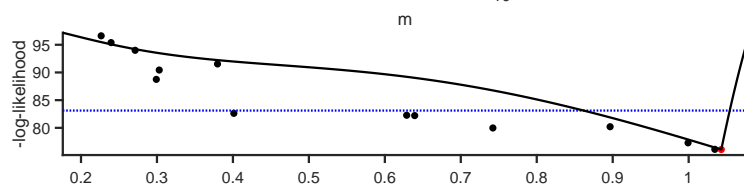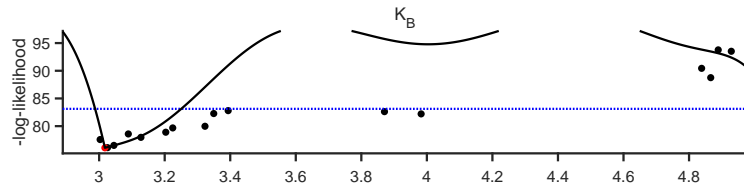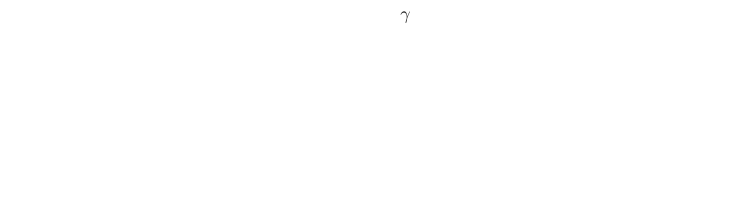



# 4 Sensitivity analysis: Increased viral clearance

## 4.1 Baseline effector cell source model

ROq14: Increased viral clearance (BL)

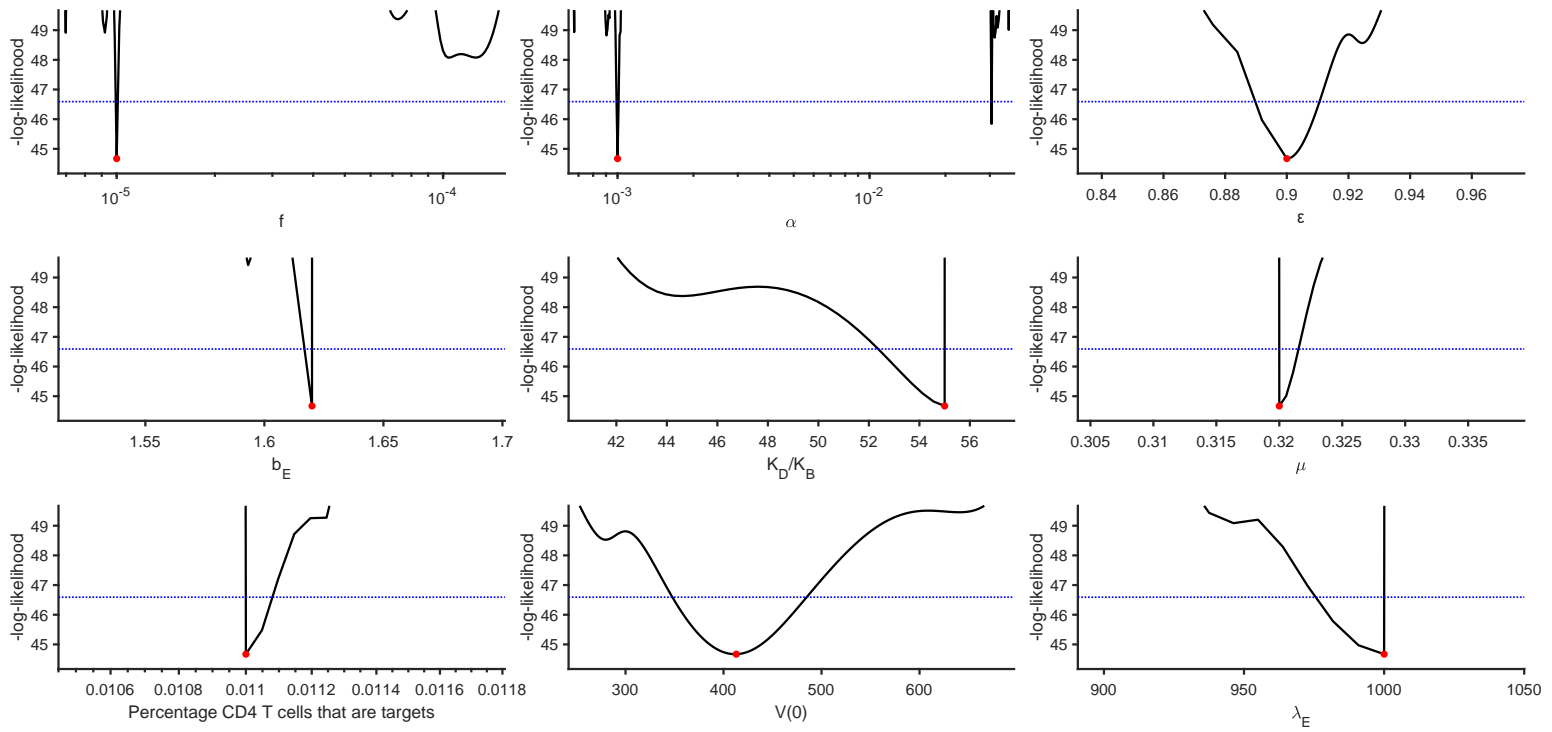

RDa15: Increased viral clearance (BL)

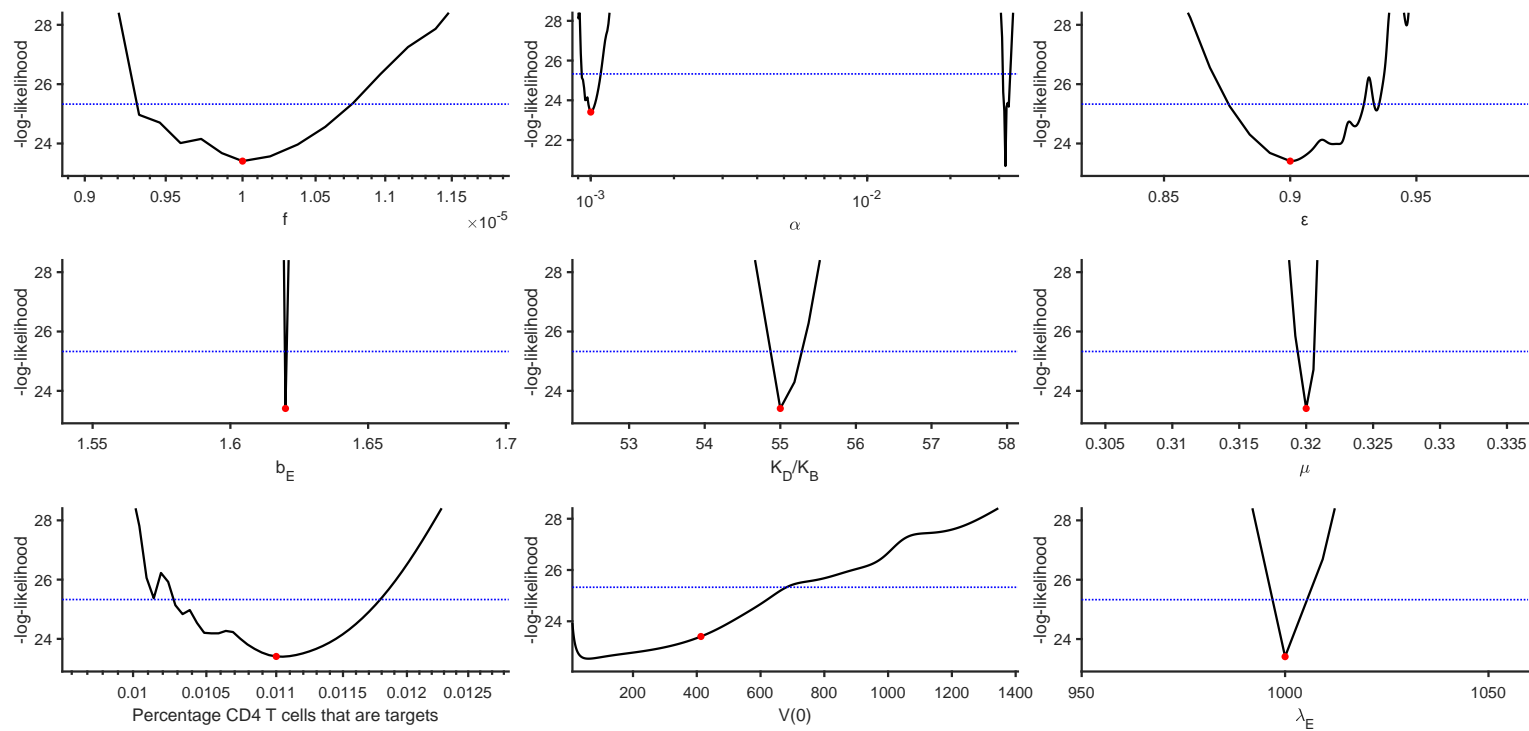

RFa15: Increased viral clearance (BL)

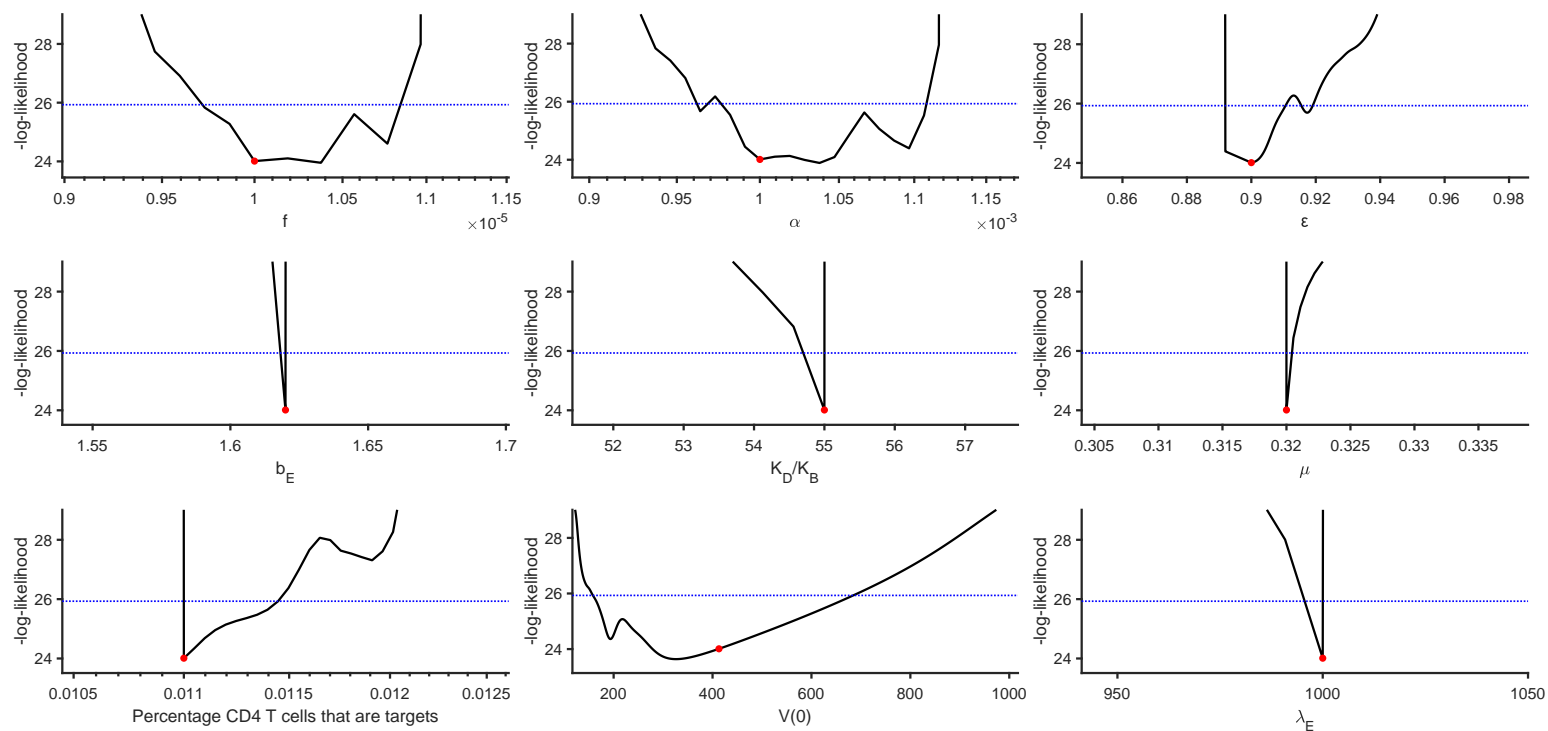

RLn12: Increased viral clearance (BL)

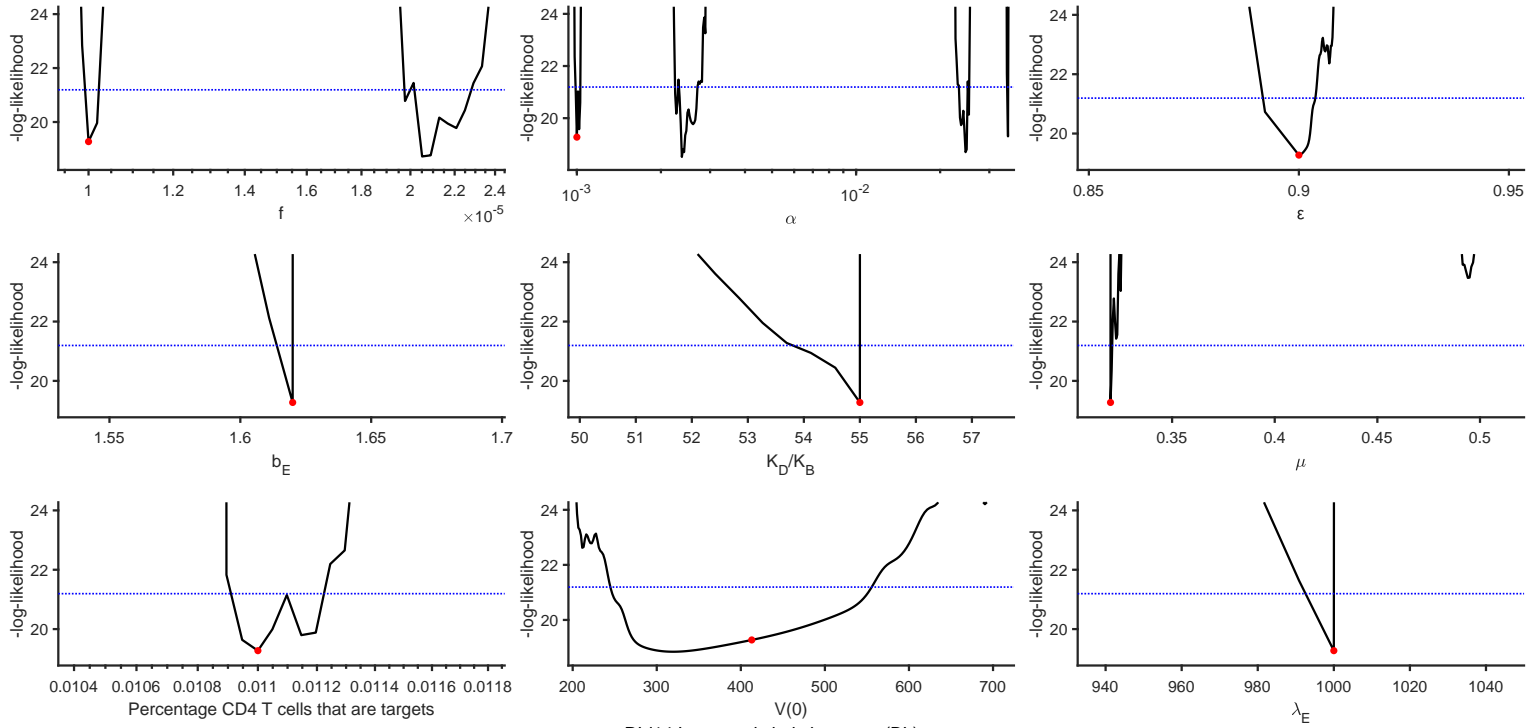

Rld14: Increased viral clearance (BL)

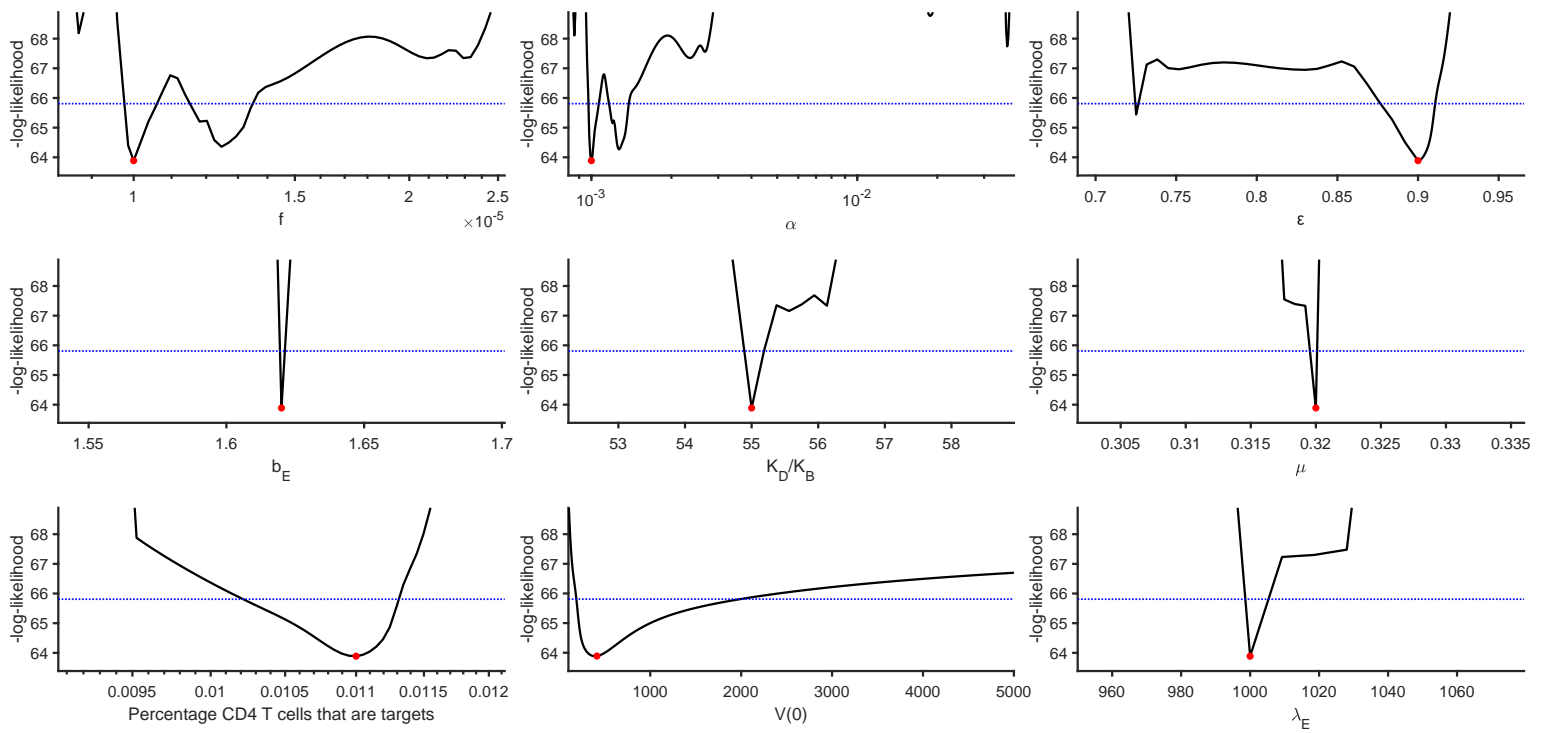

ROo13: Increased viral clearance (BL)

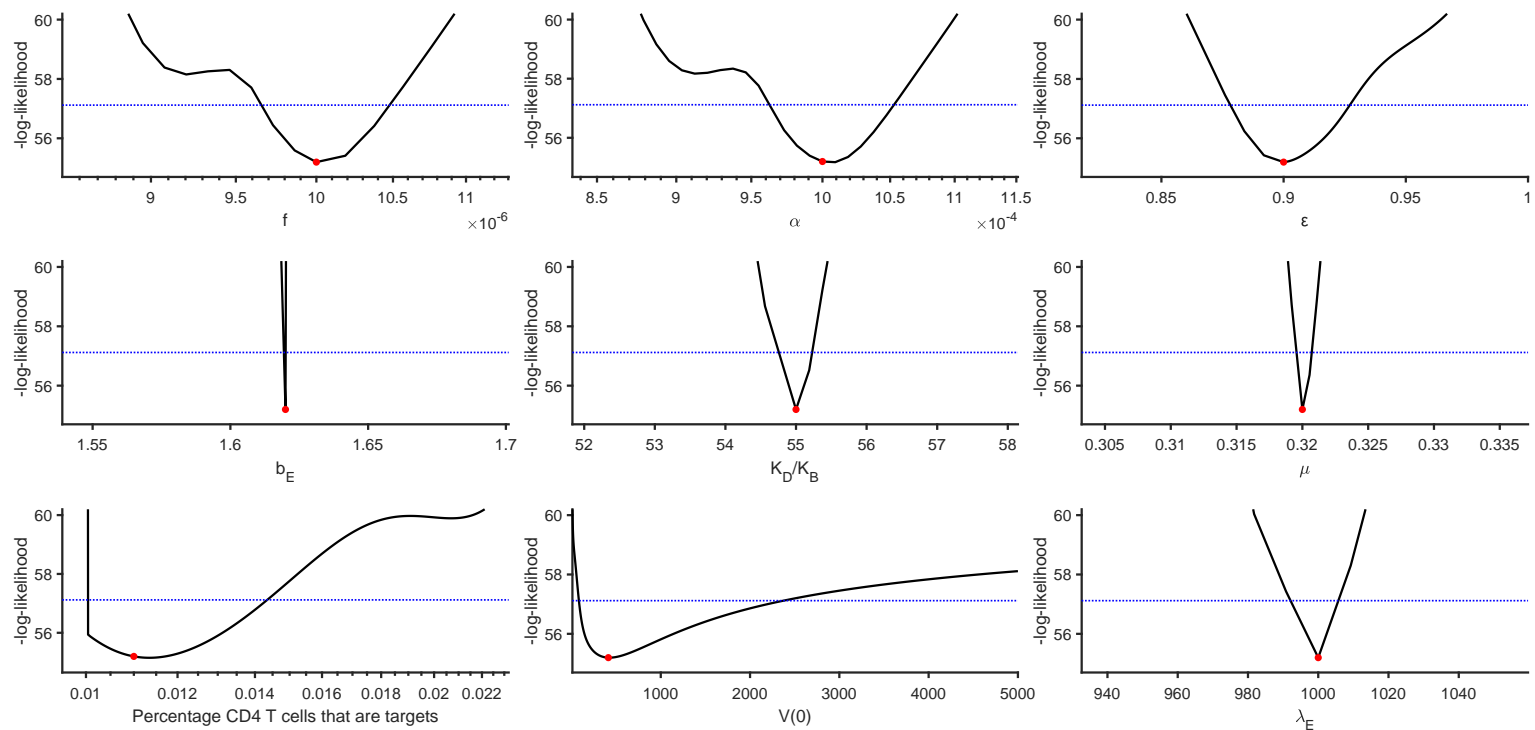

RSd14: Increased viral clearance (BL)

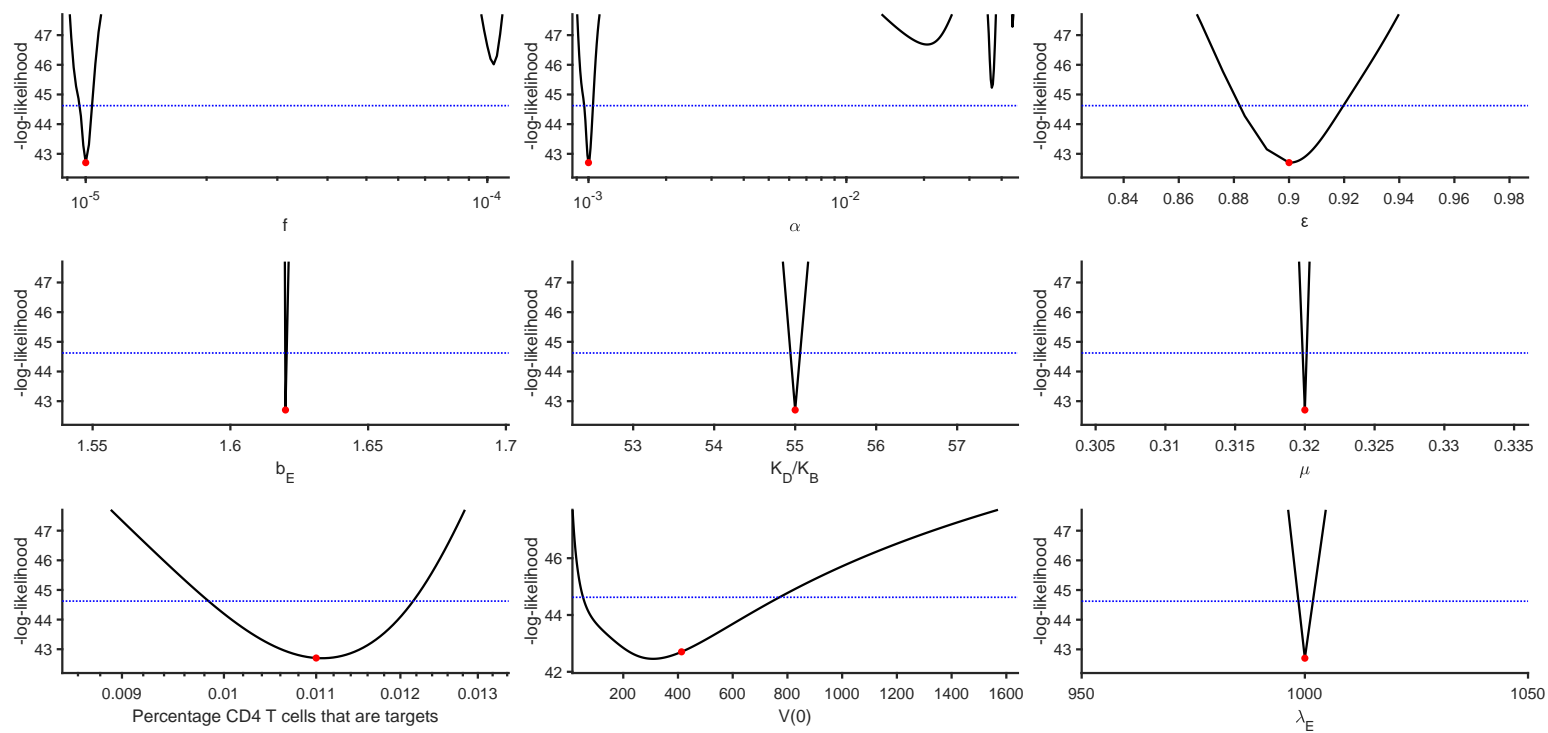

ROV14: Increased viral clearance (BL)

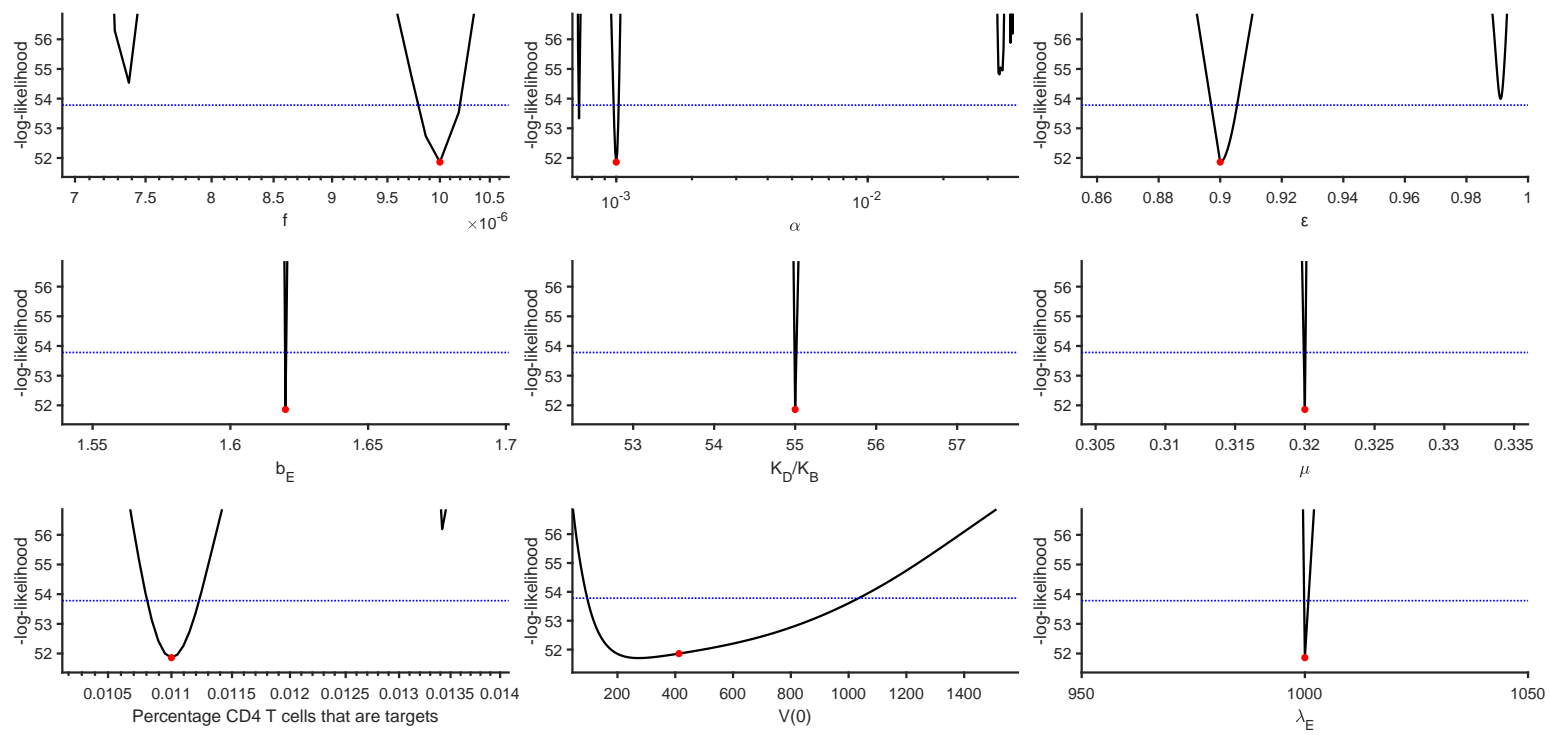

## 4.2 Saturated effector cell source model

ROq14: Increased viral clearance (SS)

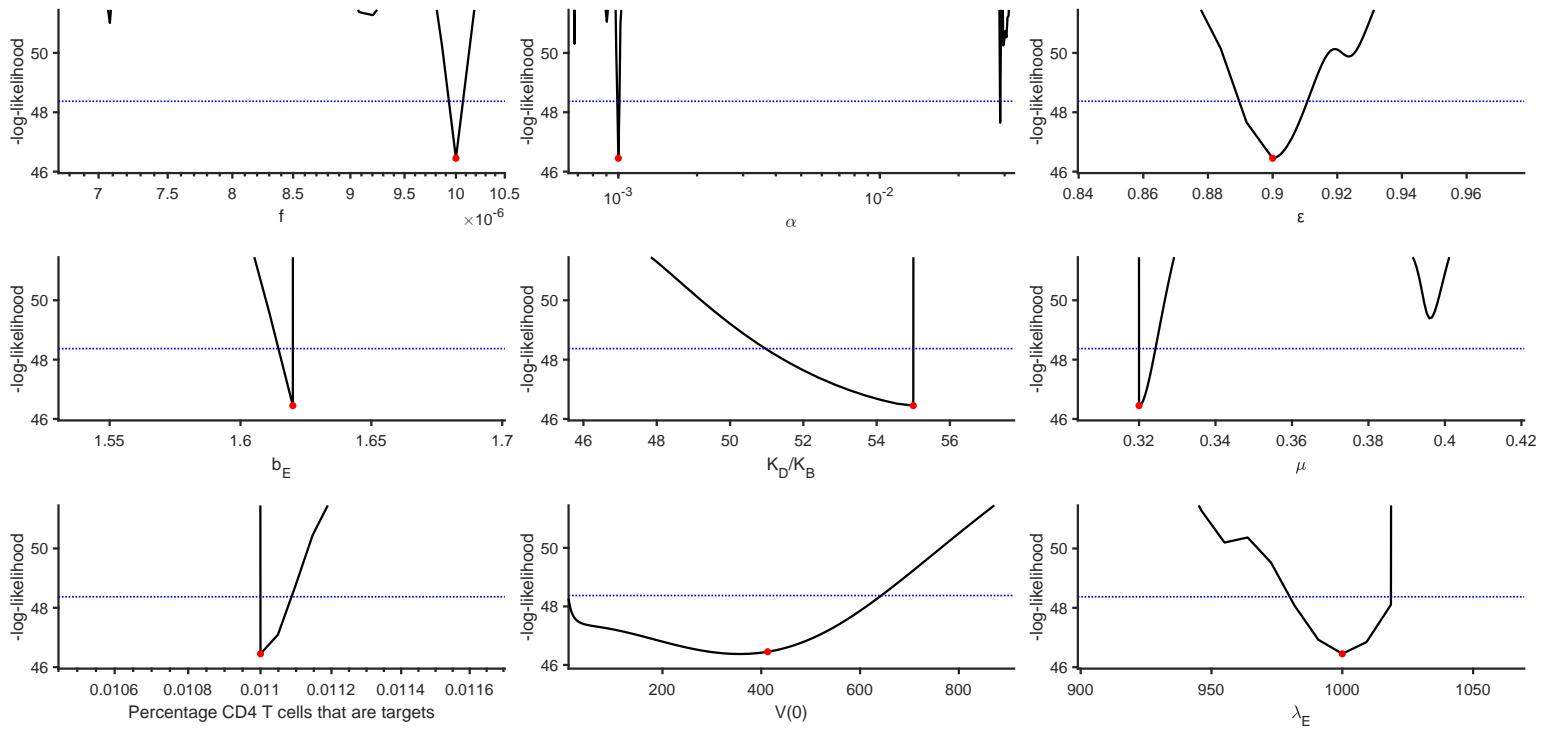

RDa15: Increased viral clearance (SS)

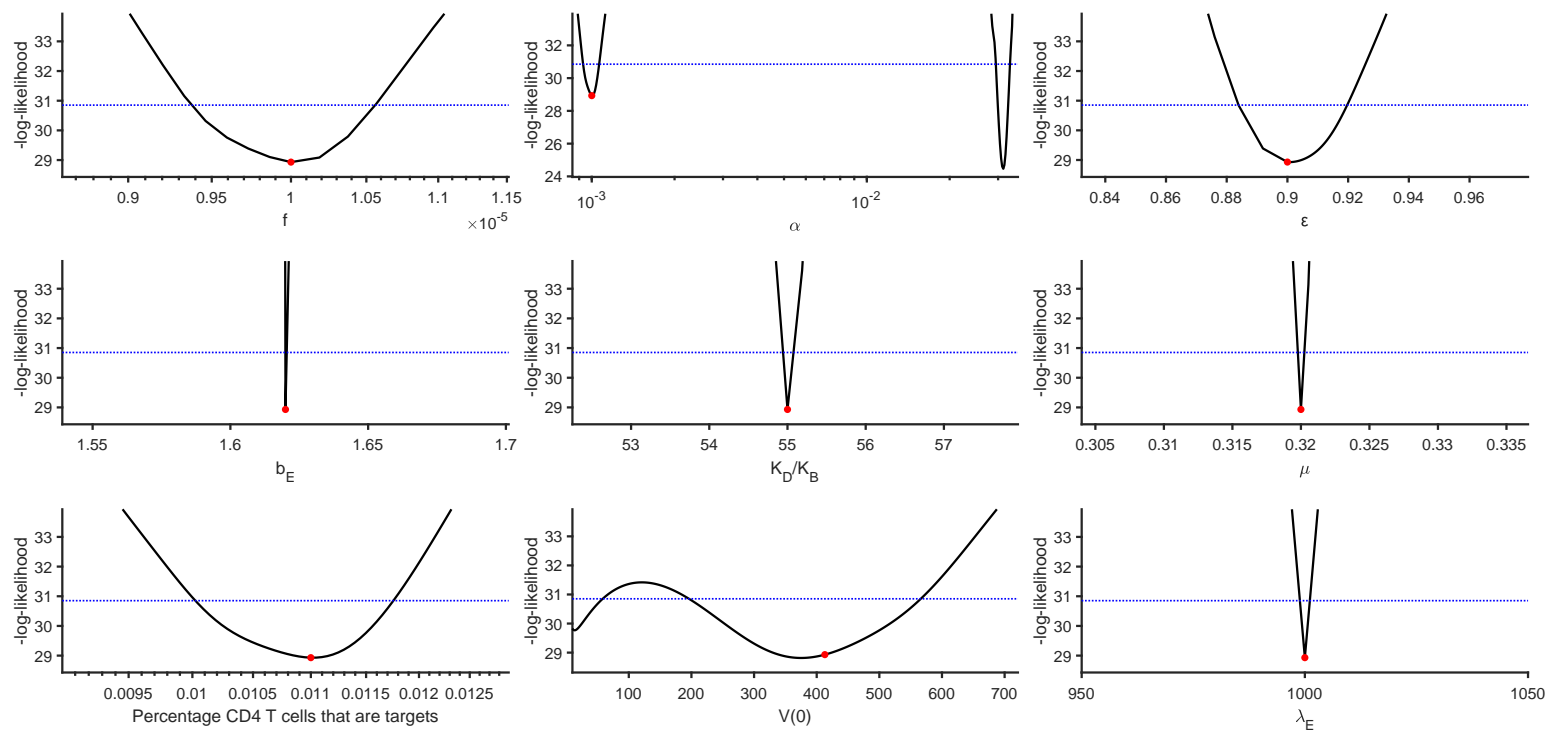

RFa15: Increased viral clearance (SS)

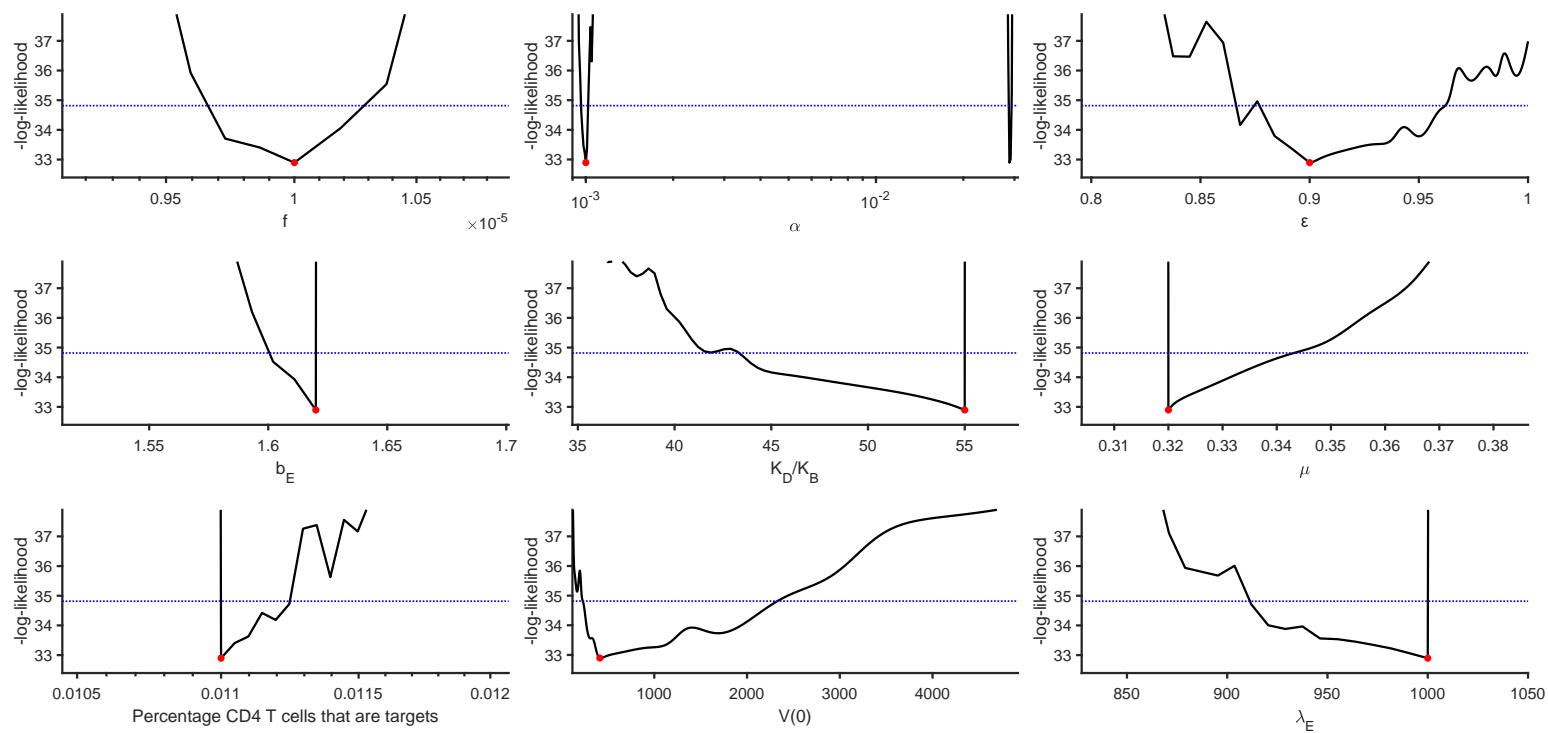

RLn12: Increased viral clearance (SS)

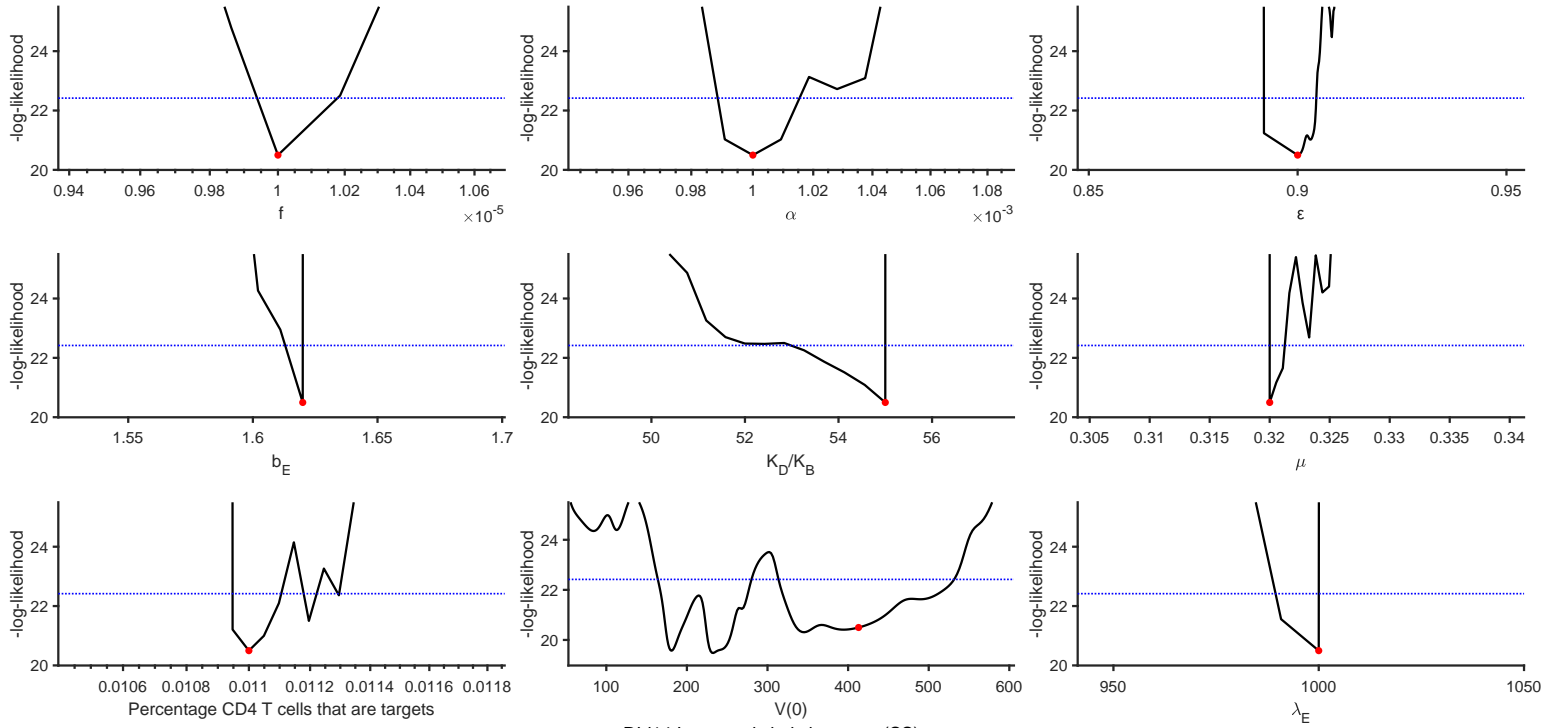

Rld14: Increased viral clearance (SS)

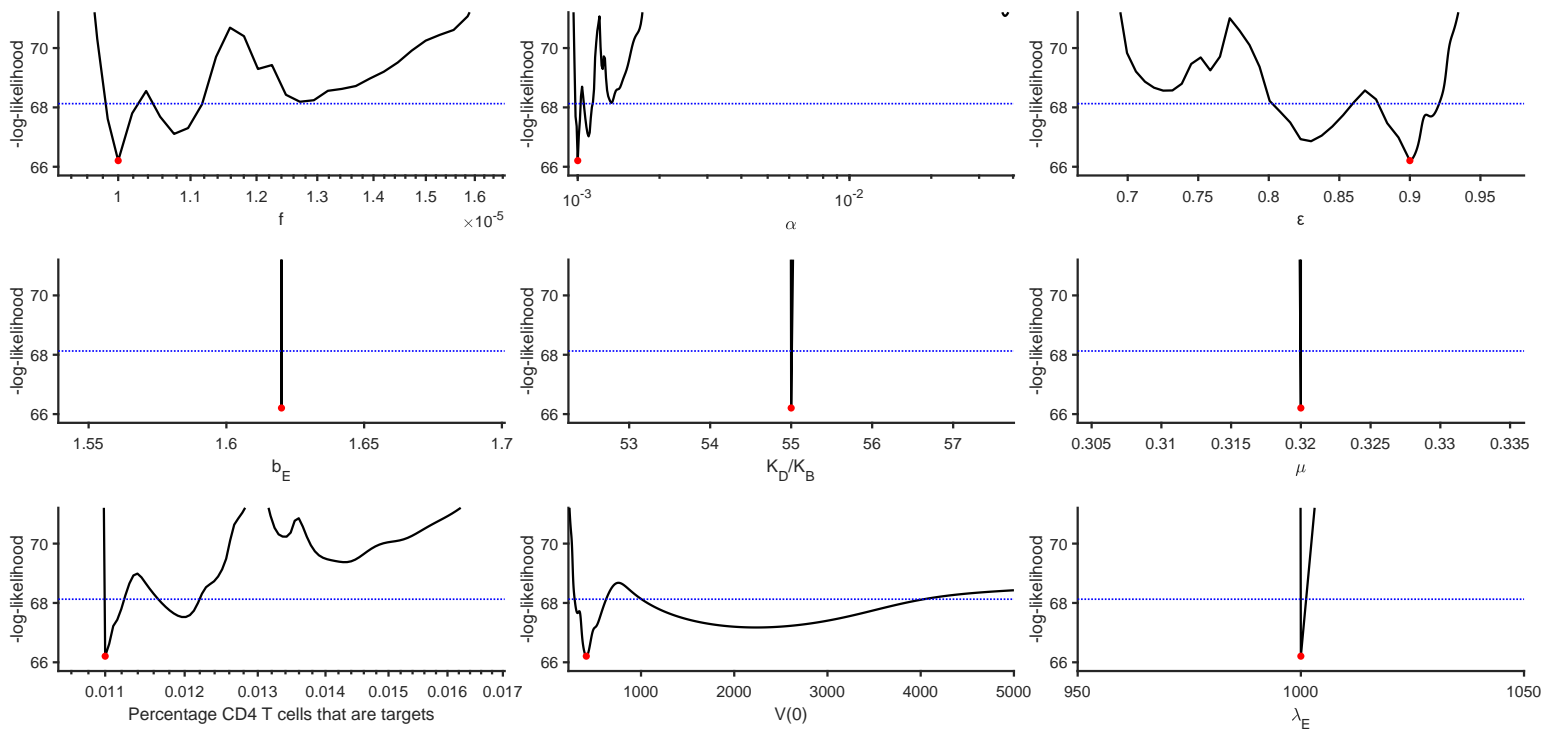



ROo13:Increased viral clearance (SS)

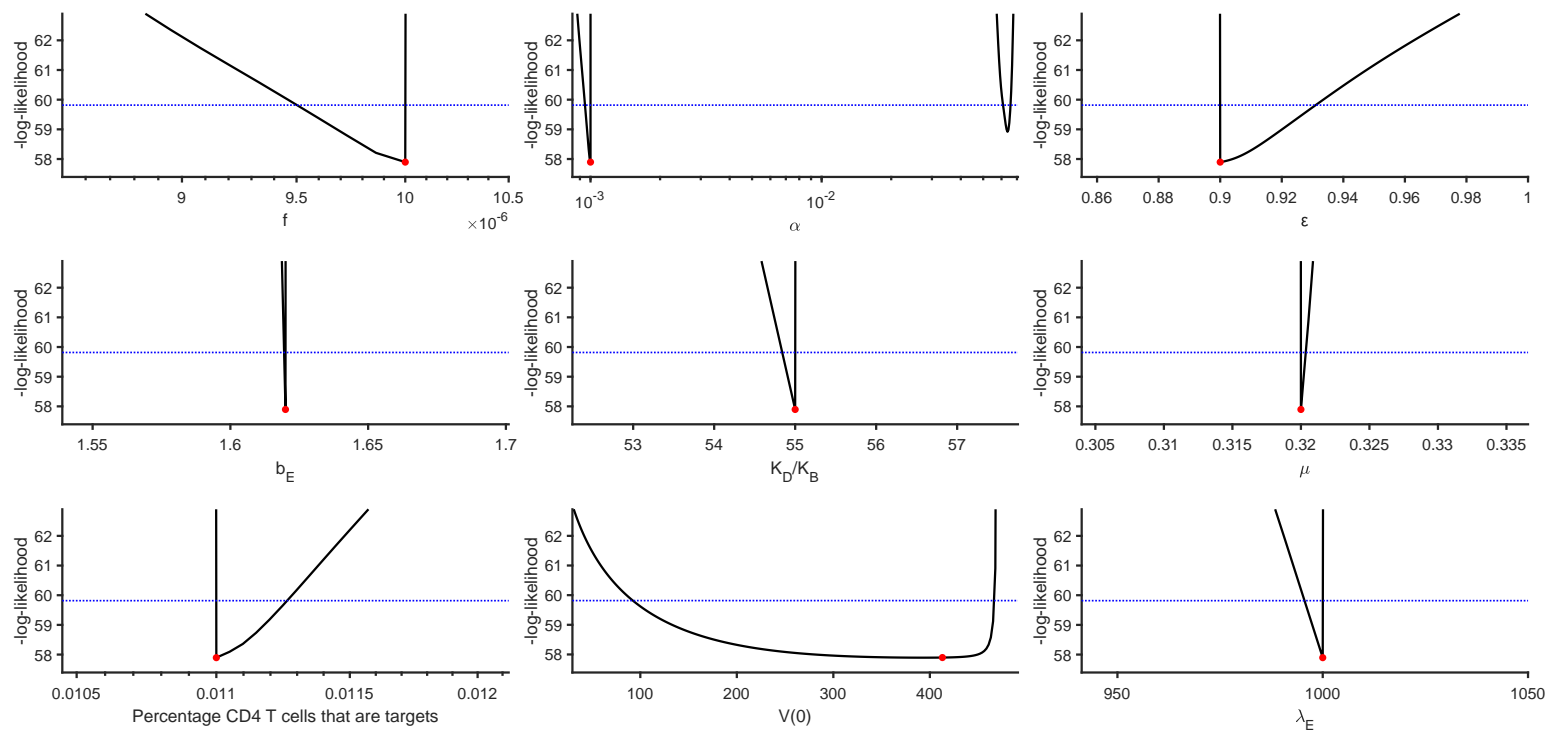

RSd14:Increased viral clearance (SS)

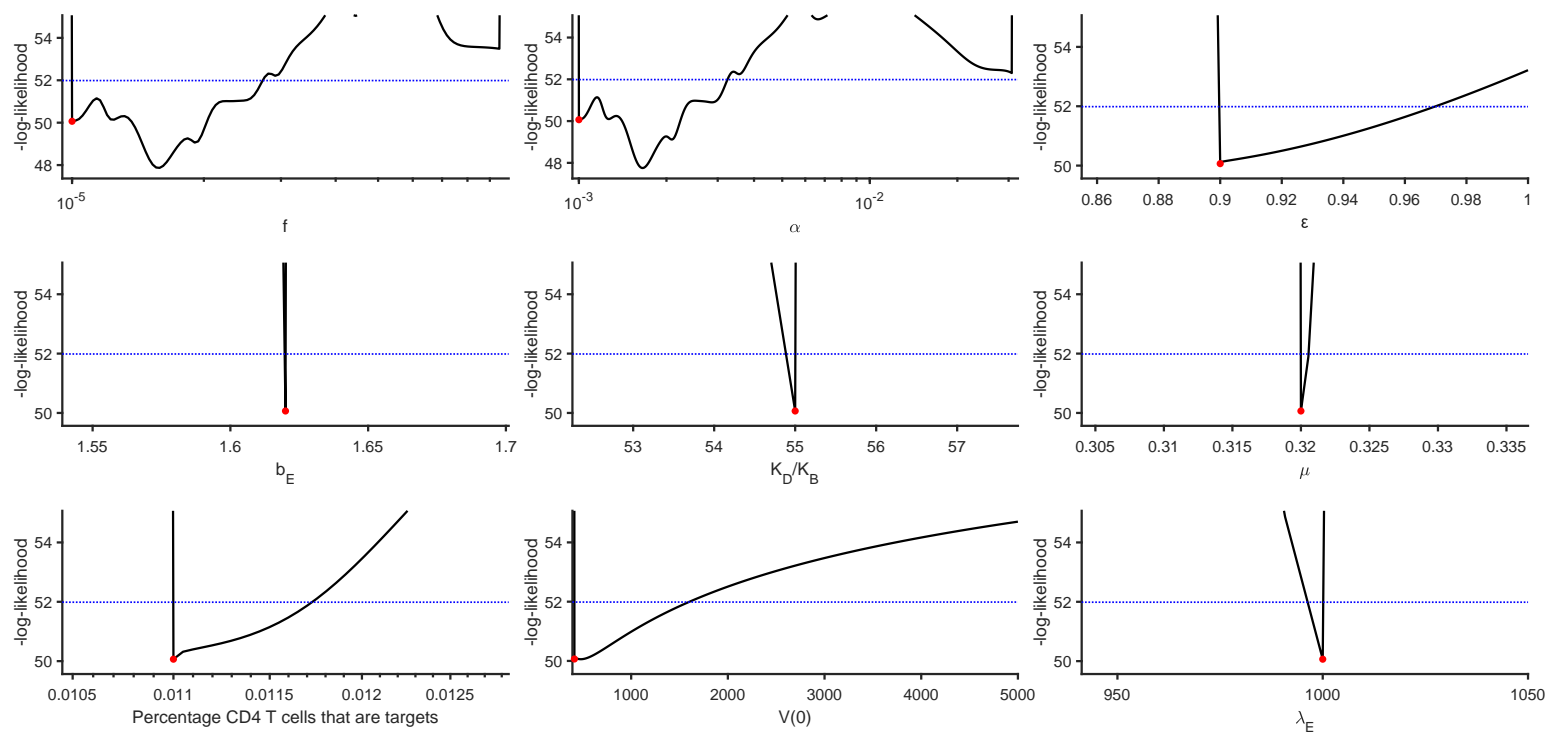

ROv14: Increased viral clearance (SS)

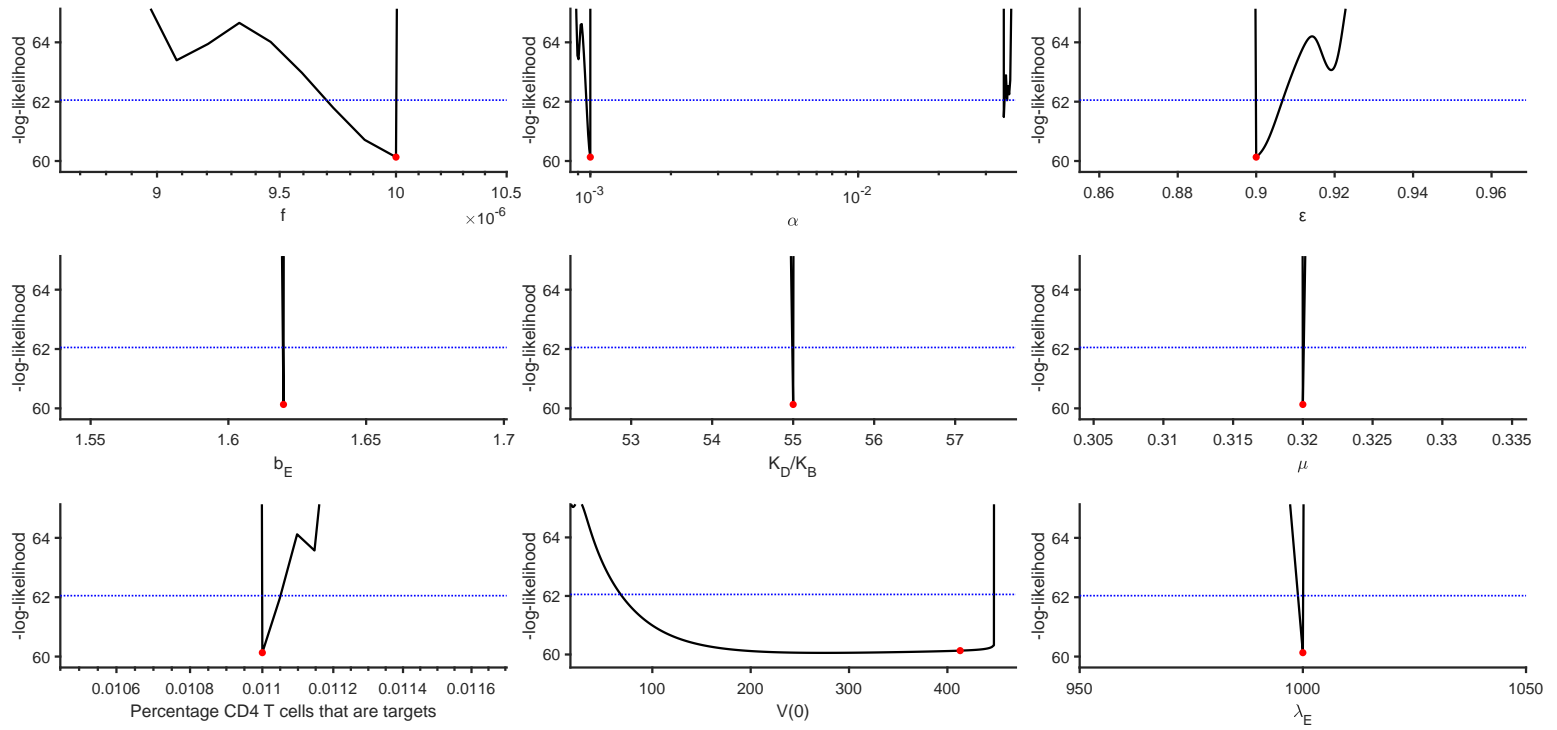

### 4.3 Antigen presenting cell effector cell source model

ROq14: Increased viral clearance (APCS)

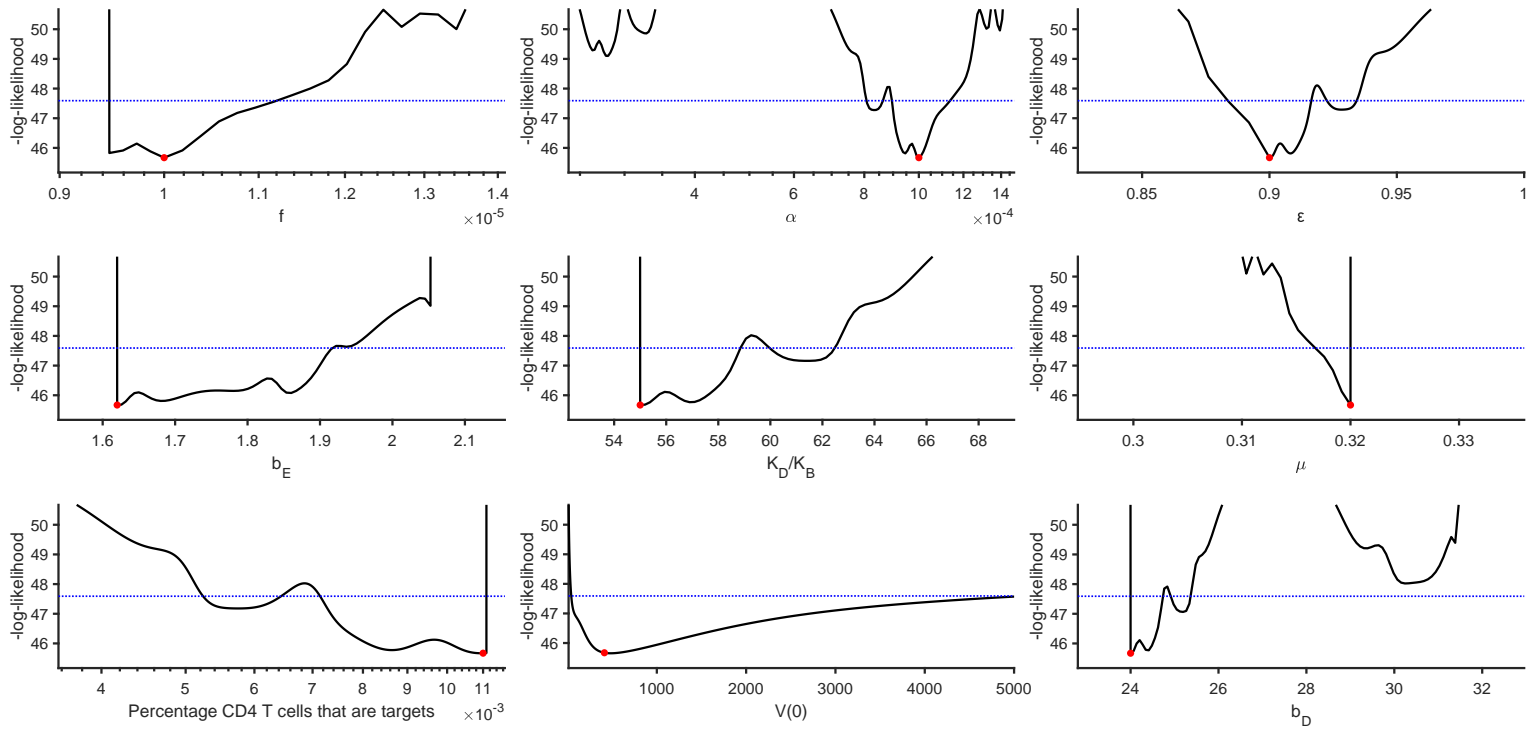

RDa15:Increased viral clearance (APCS)

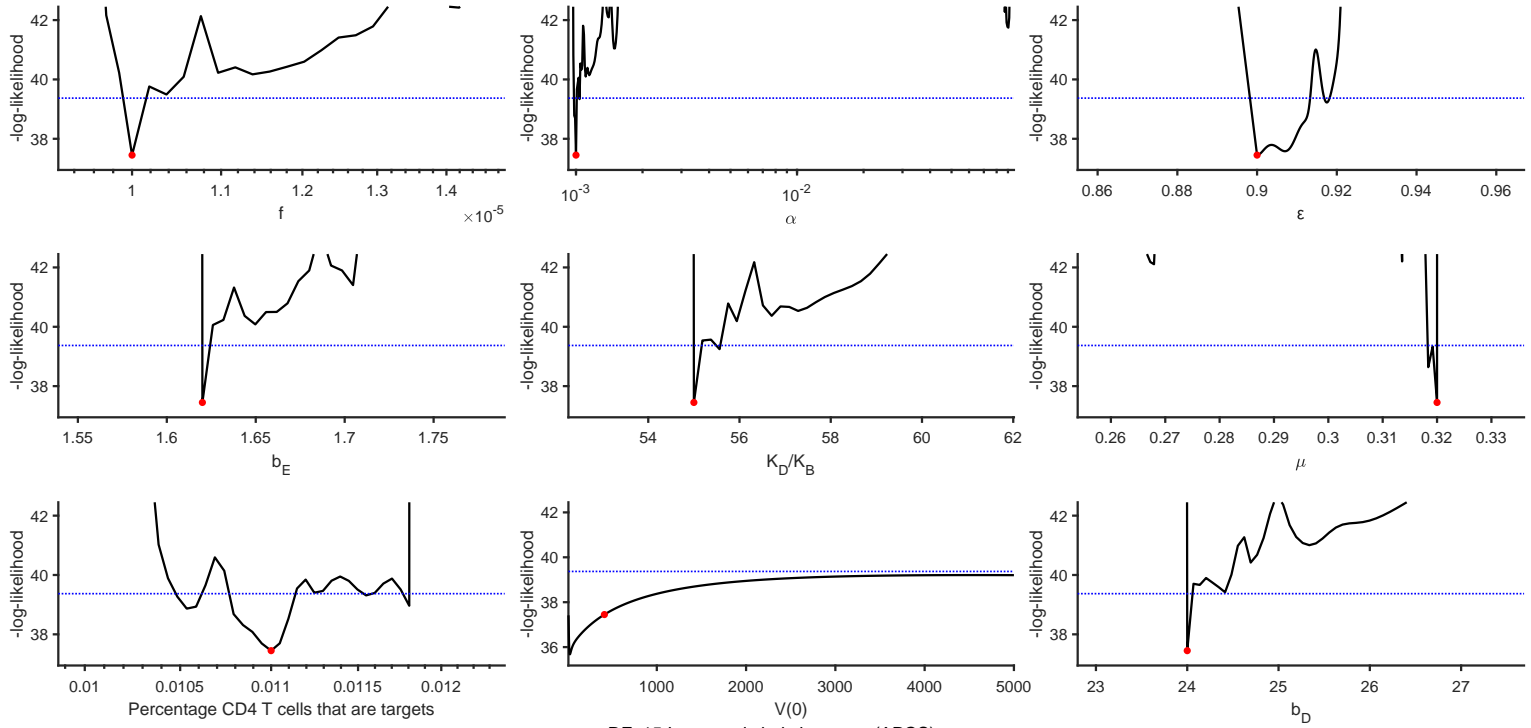

RFa15:Increased viral clearance (APCS)

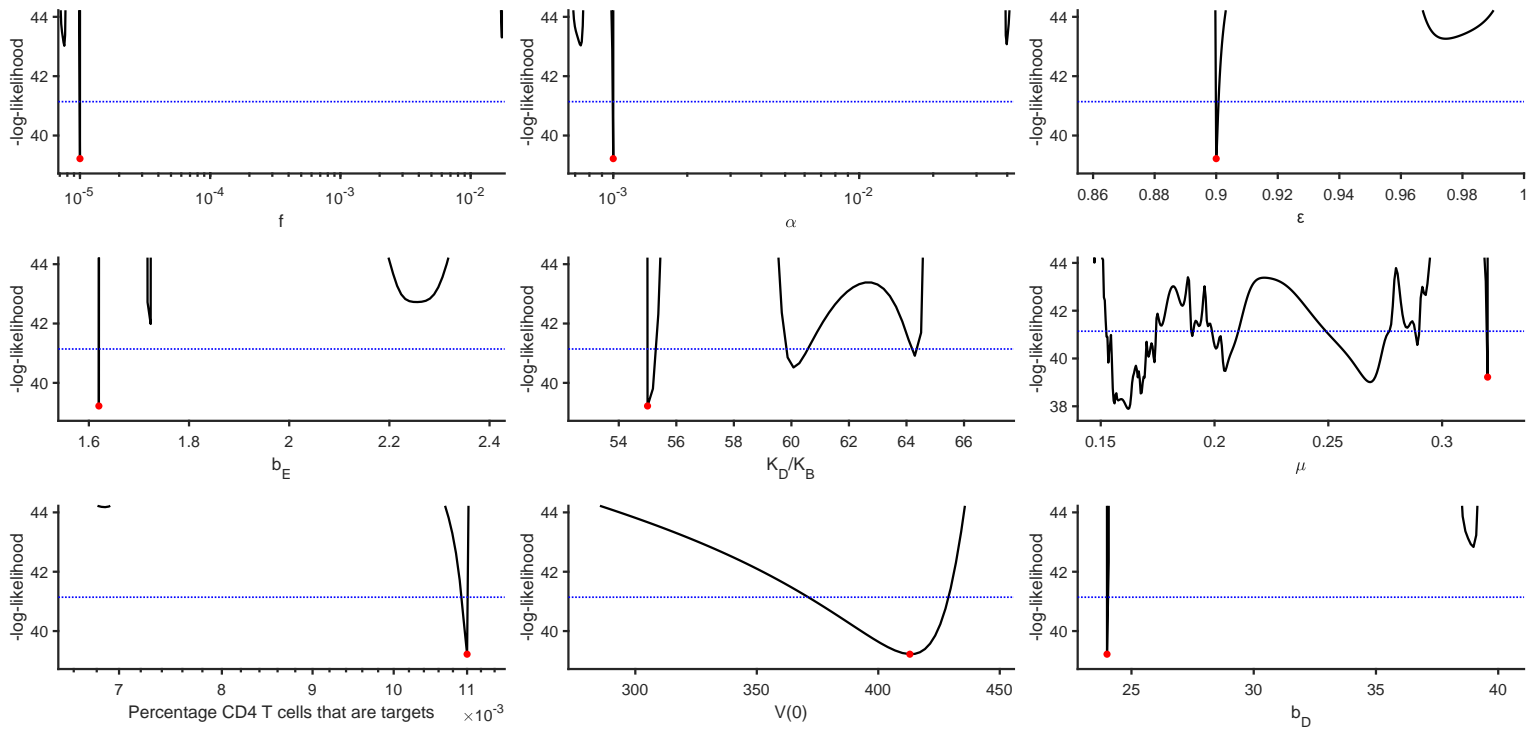

RLn12: Increased viral clearance (APCS)

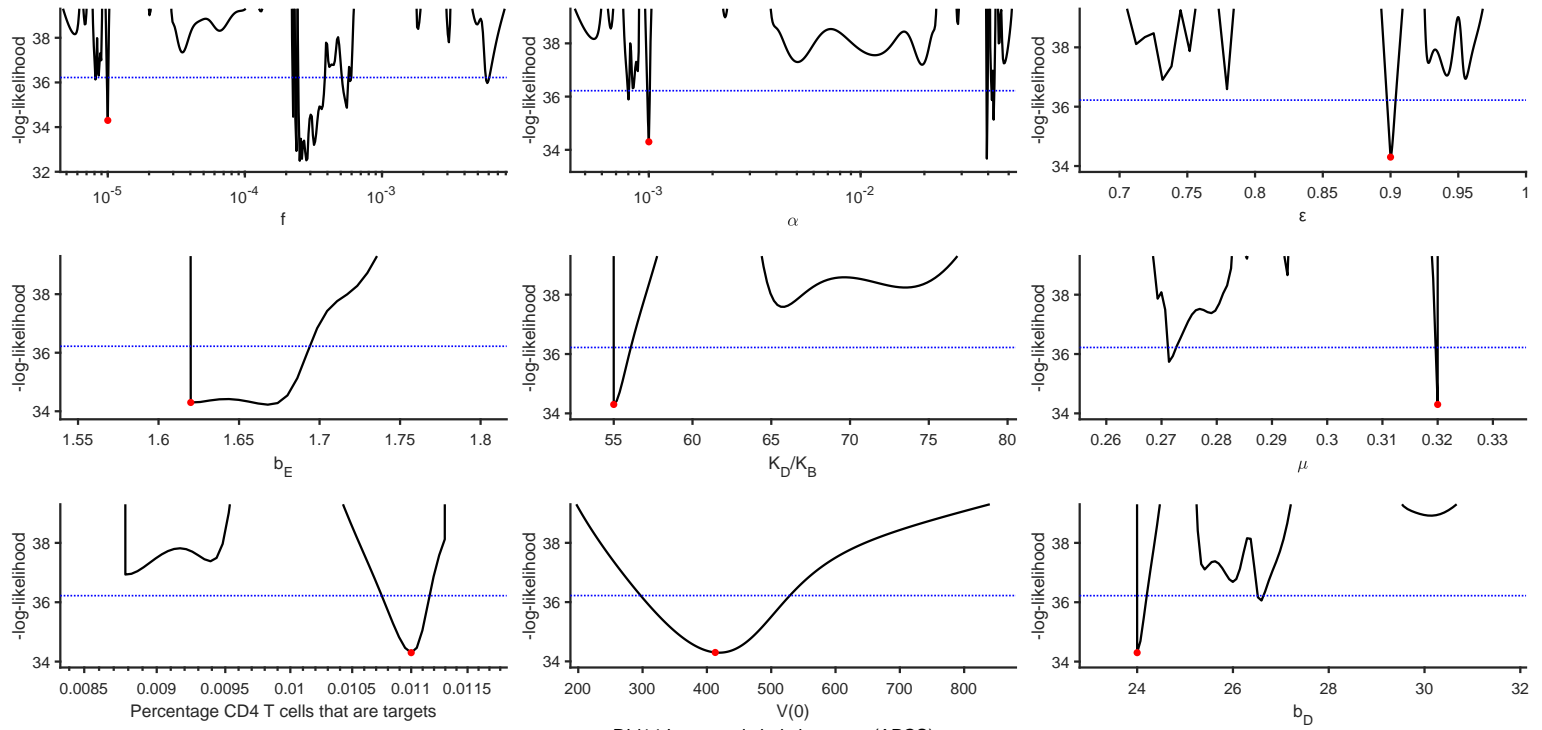

Rld14: Increased viral clearance (APCS)

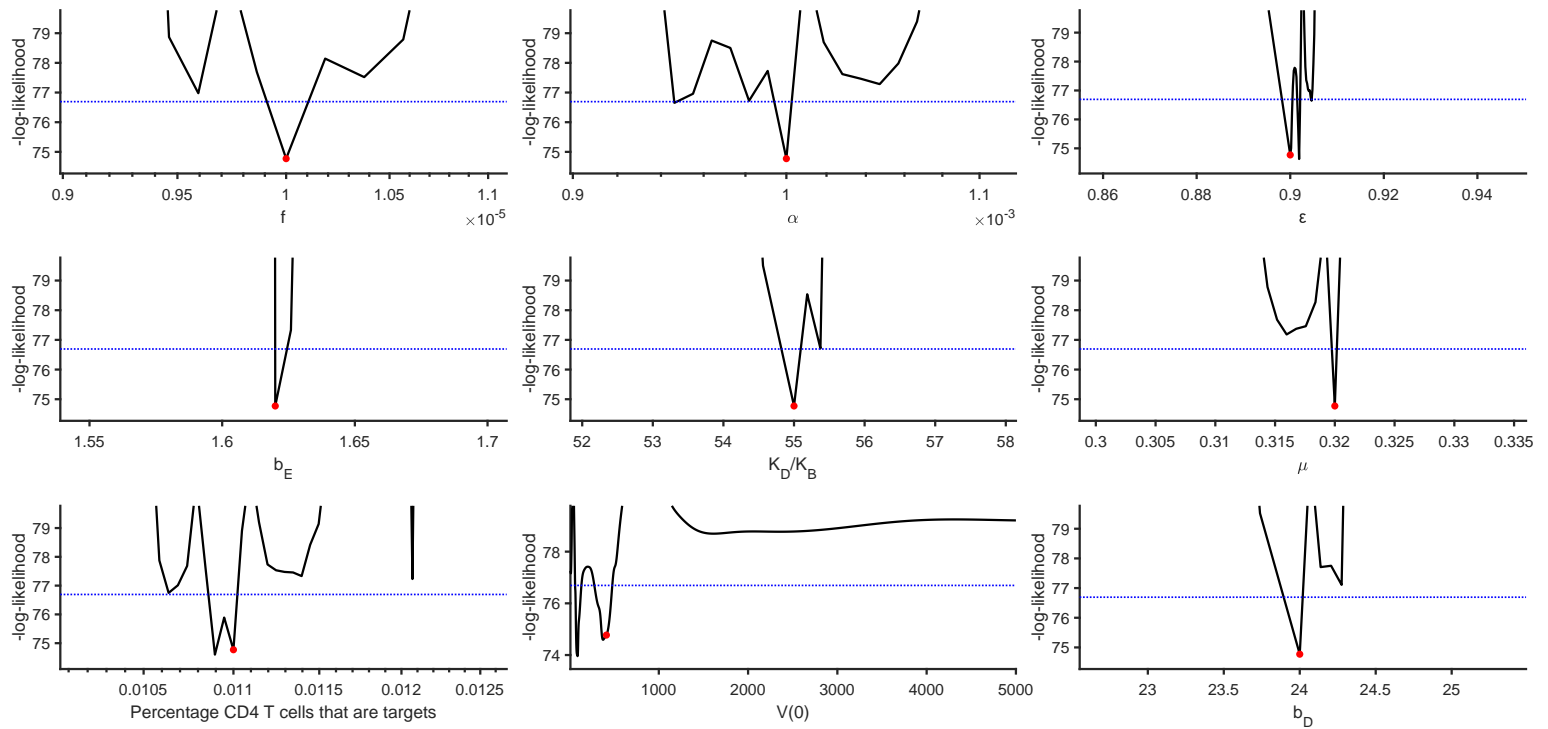

ROo13:Increased viral clearance (APCS)

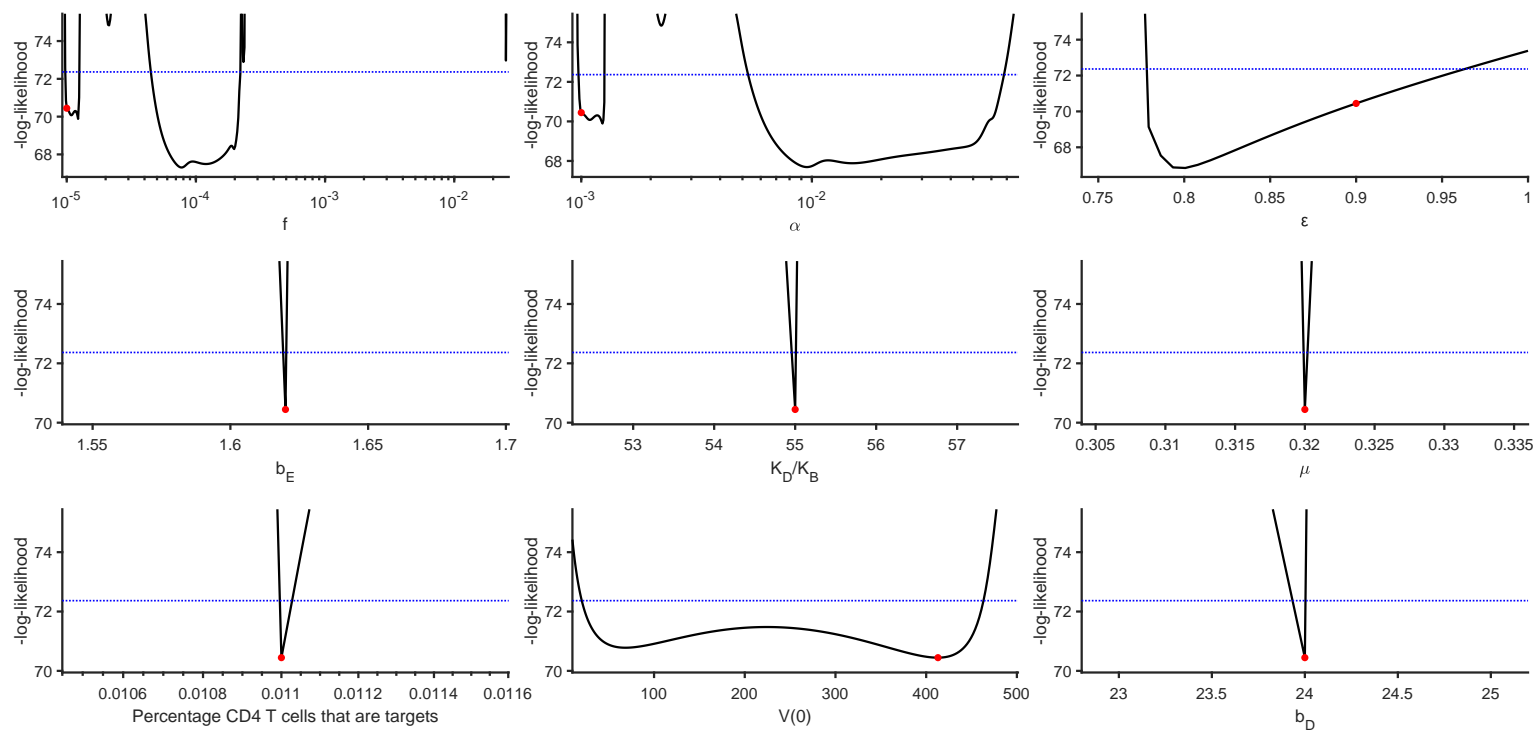

RSd14:Increased viral clearance (APCS)

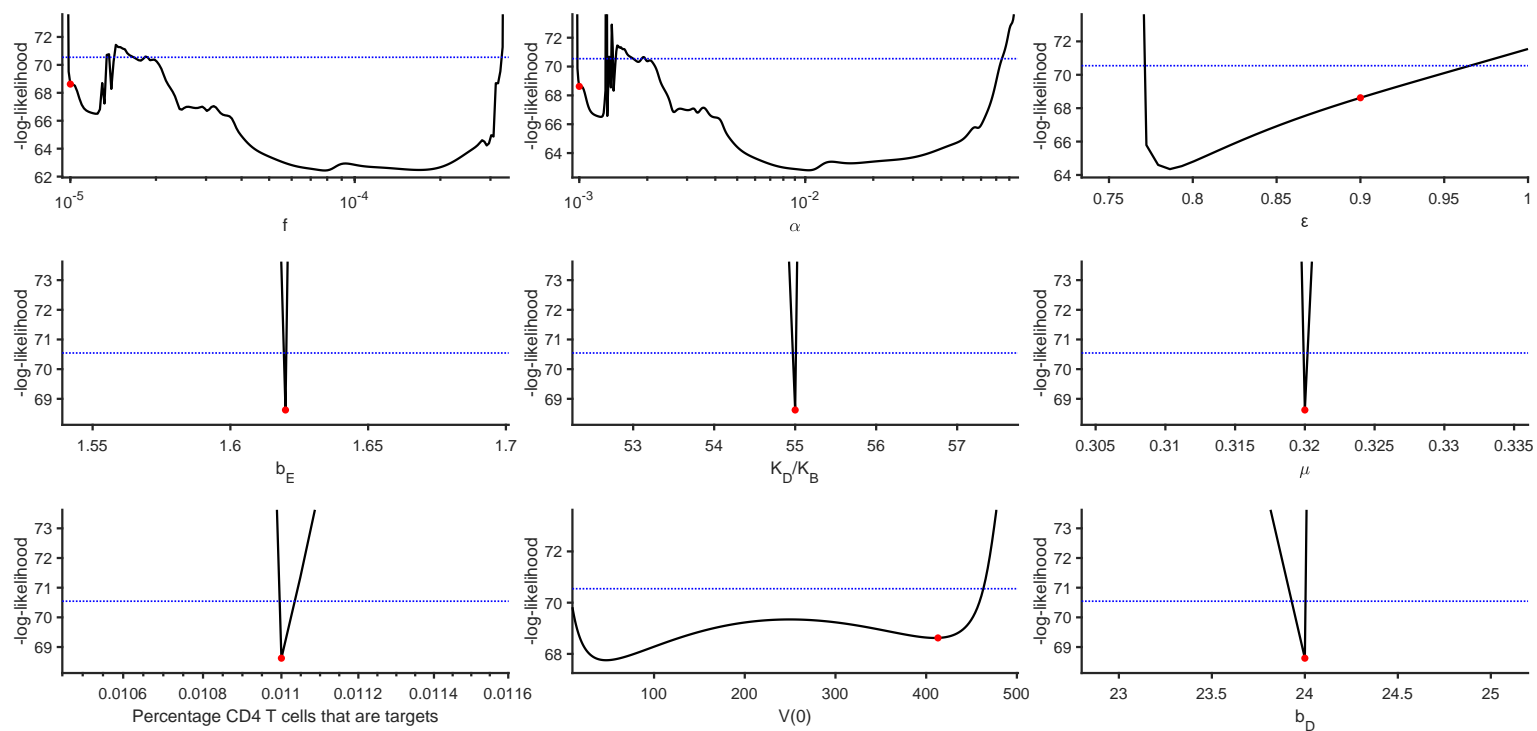

ROv14: Increased viral clearance (APCS)

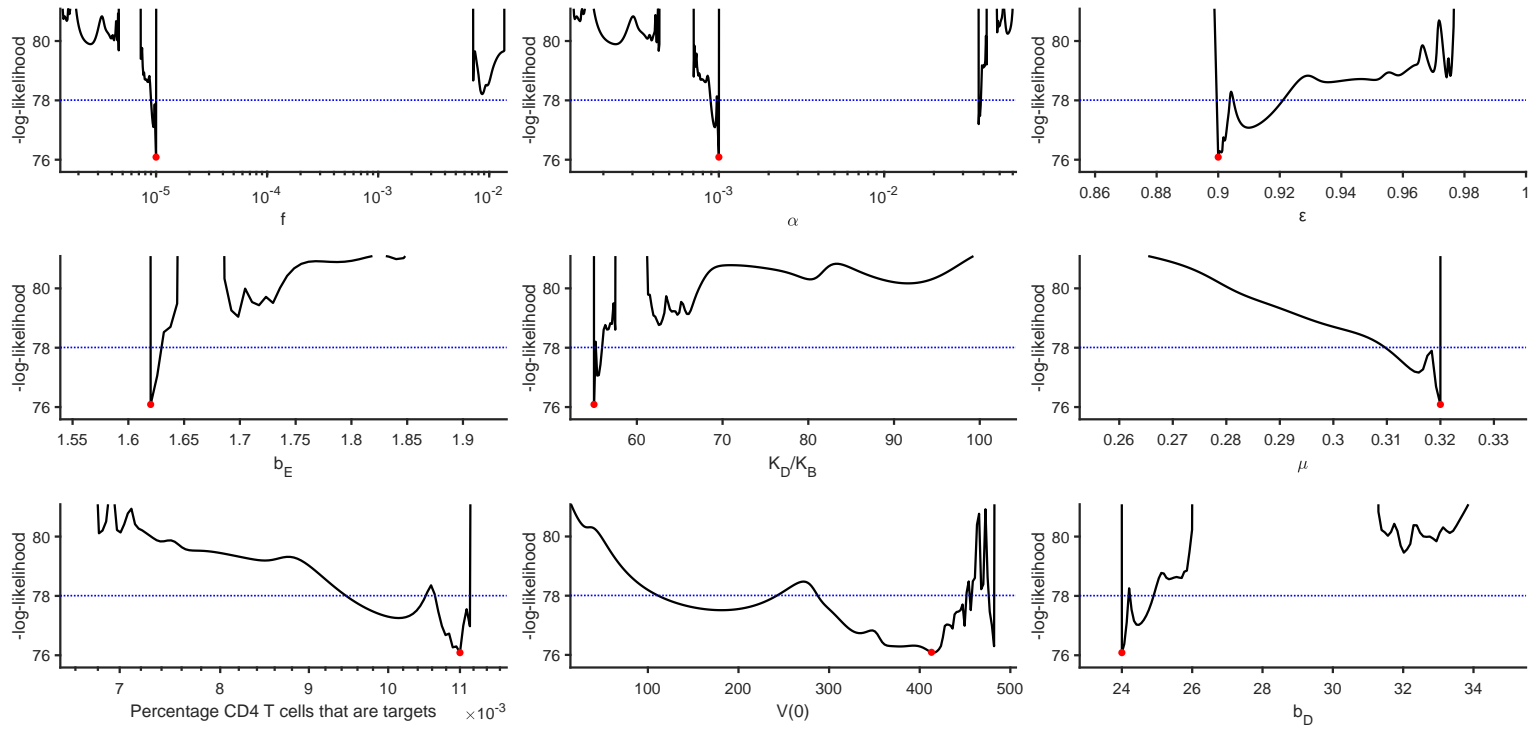

# 5 Likelihood profiles: Viral neutralization

## 5.1 Baseline effector cell source model

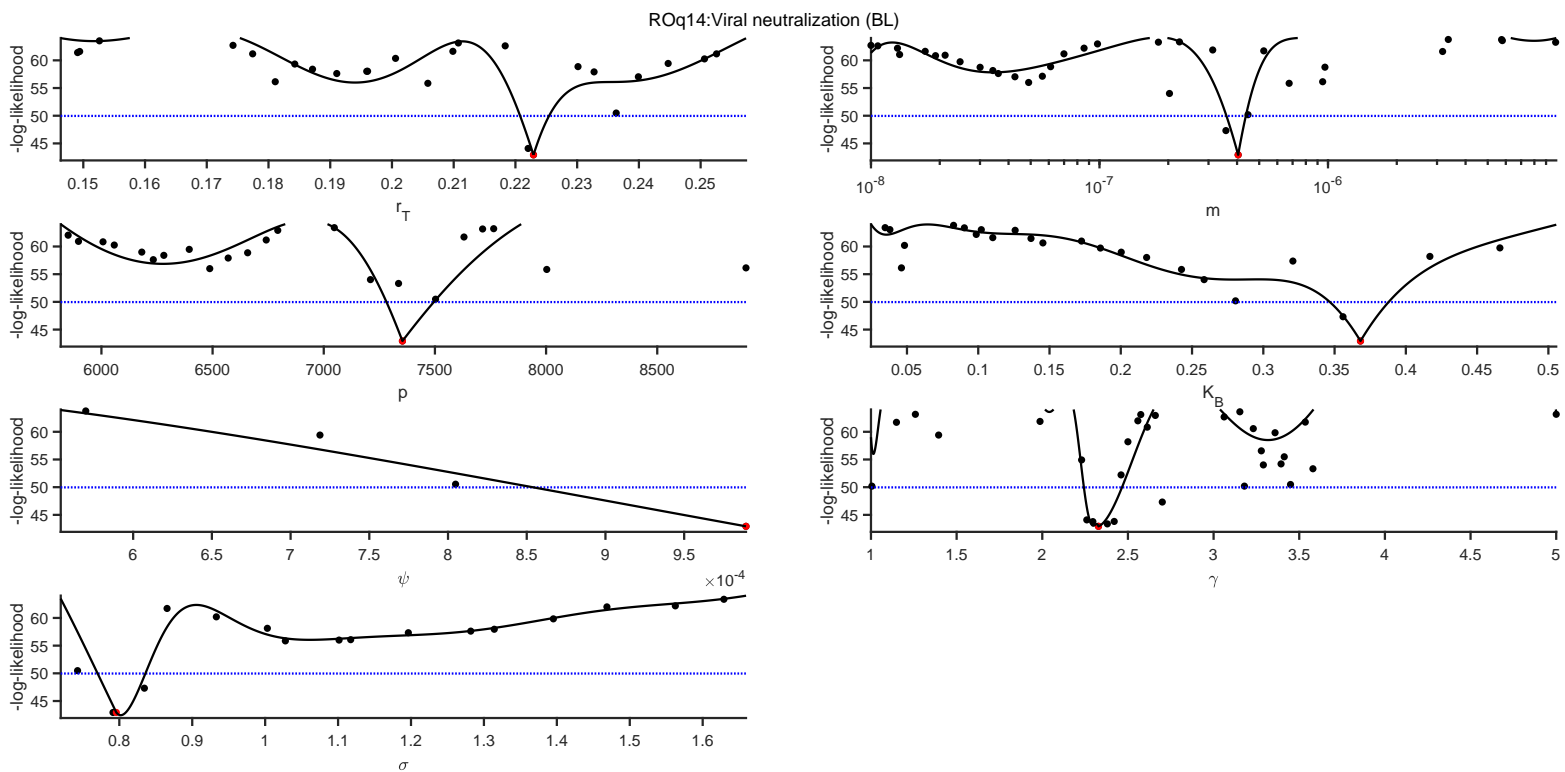



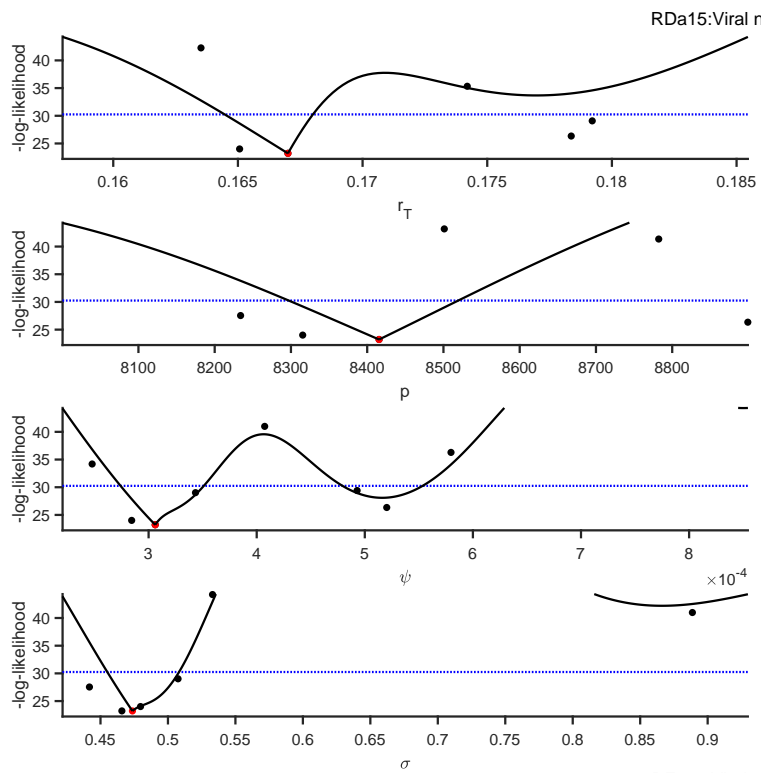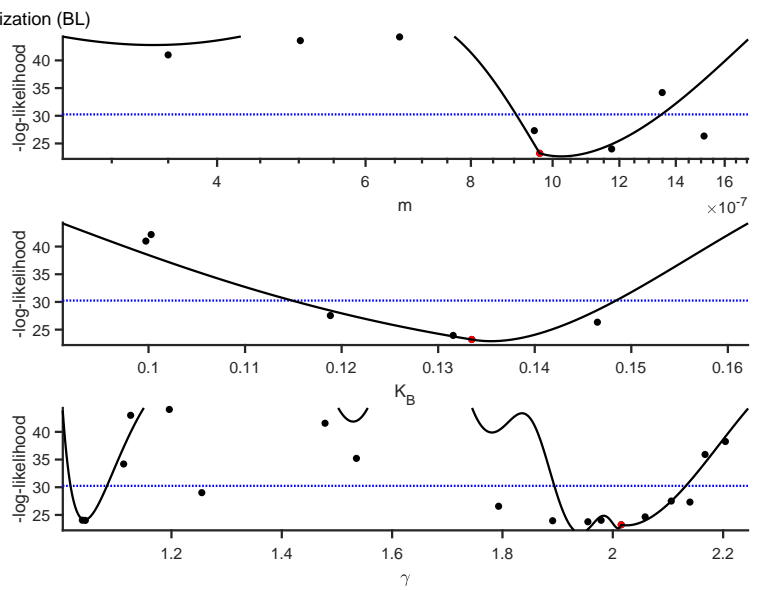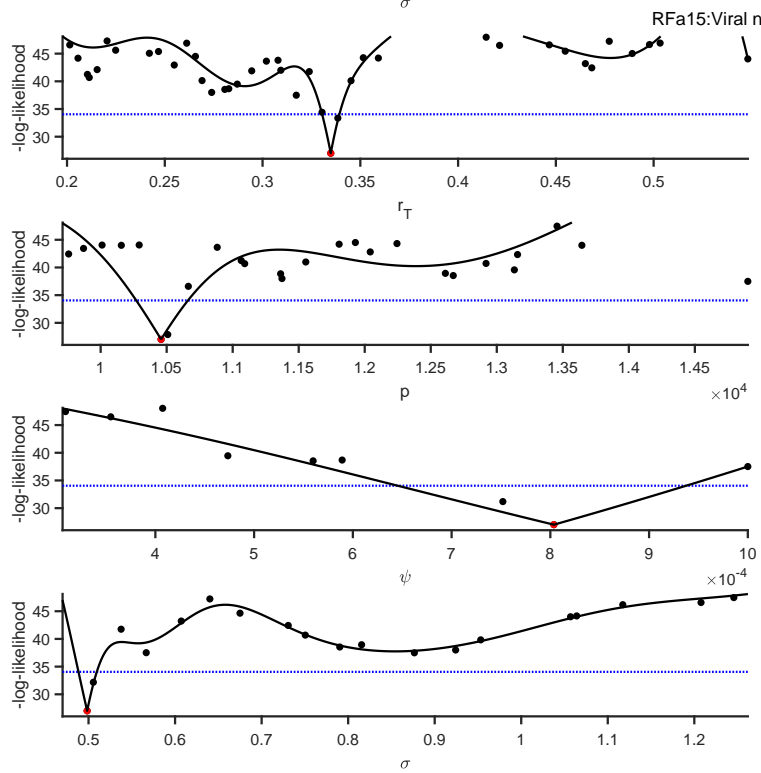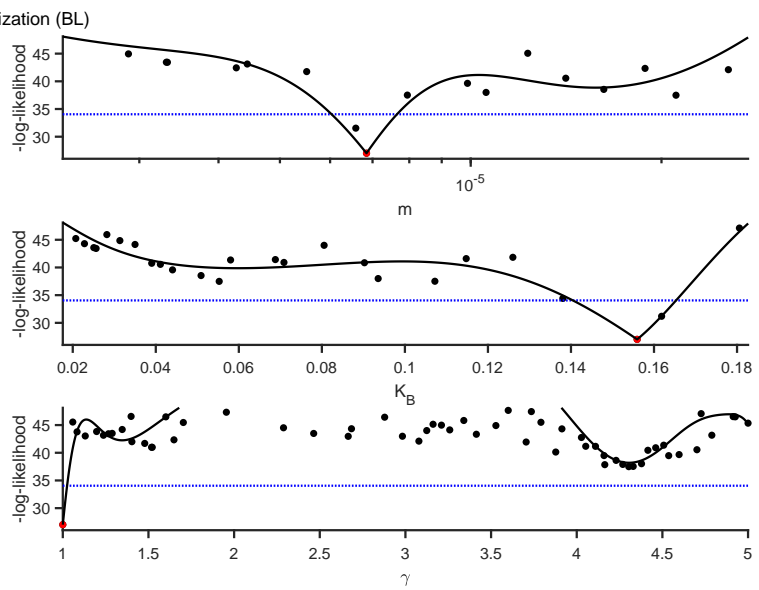

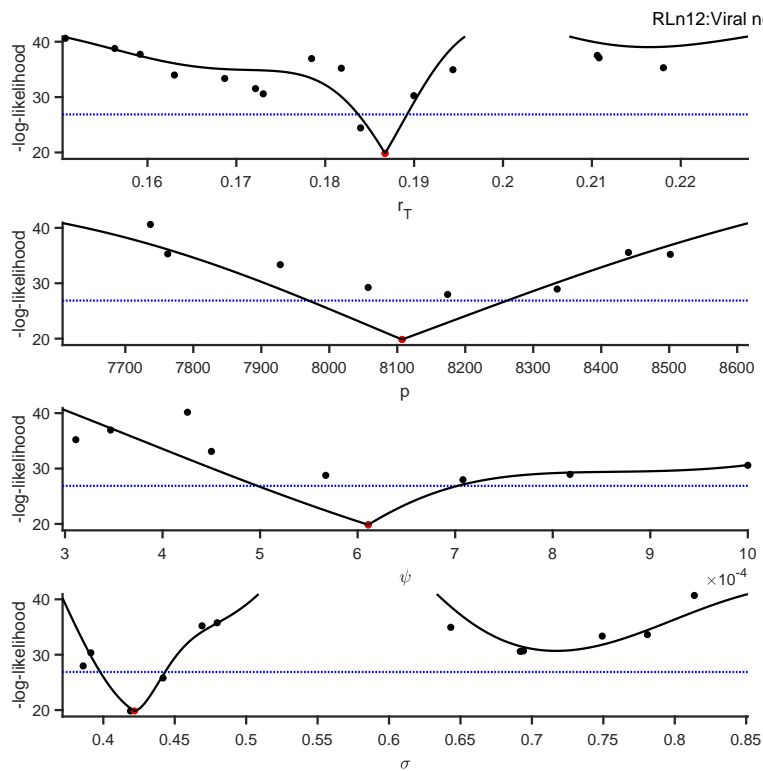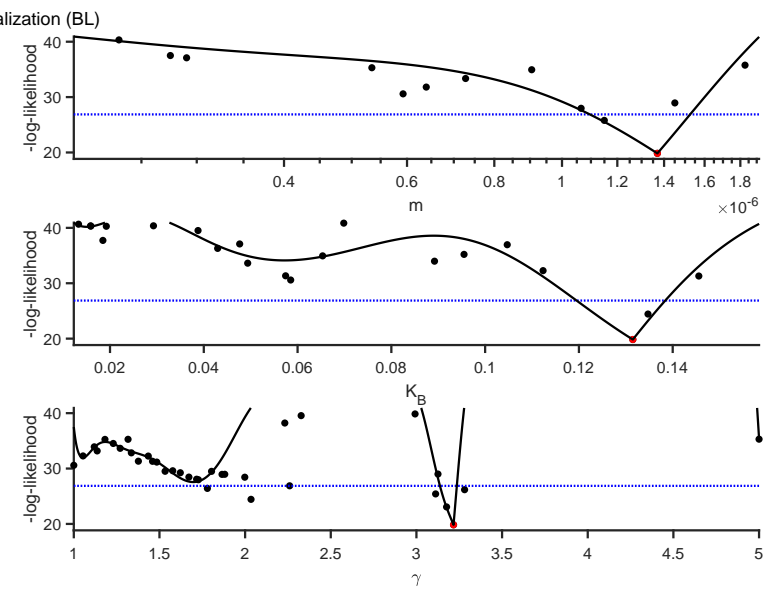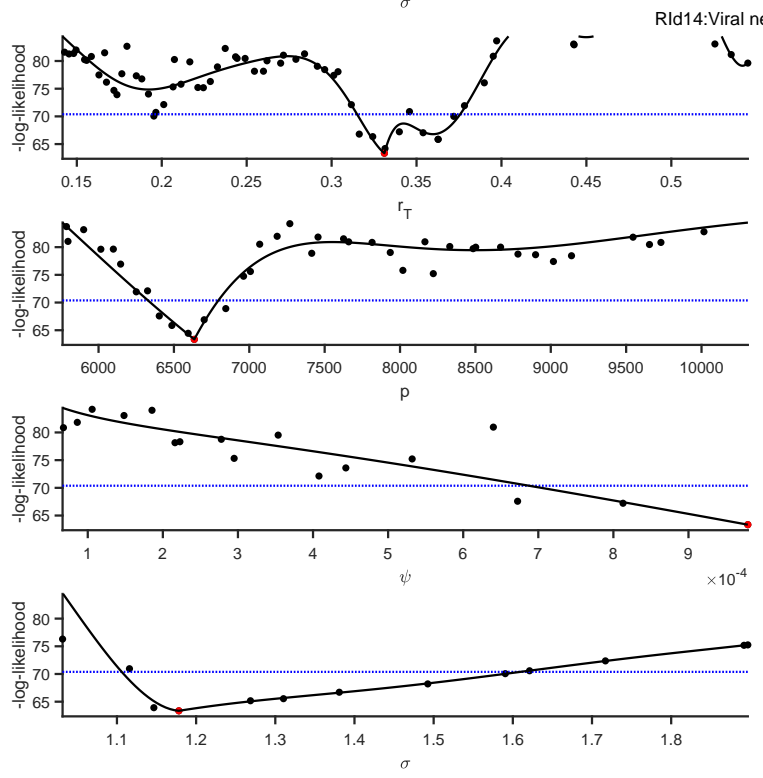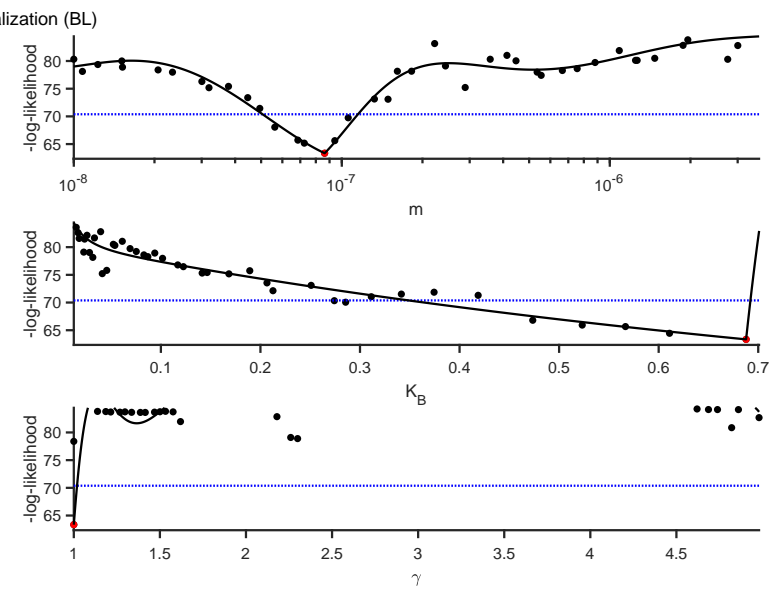

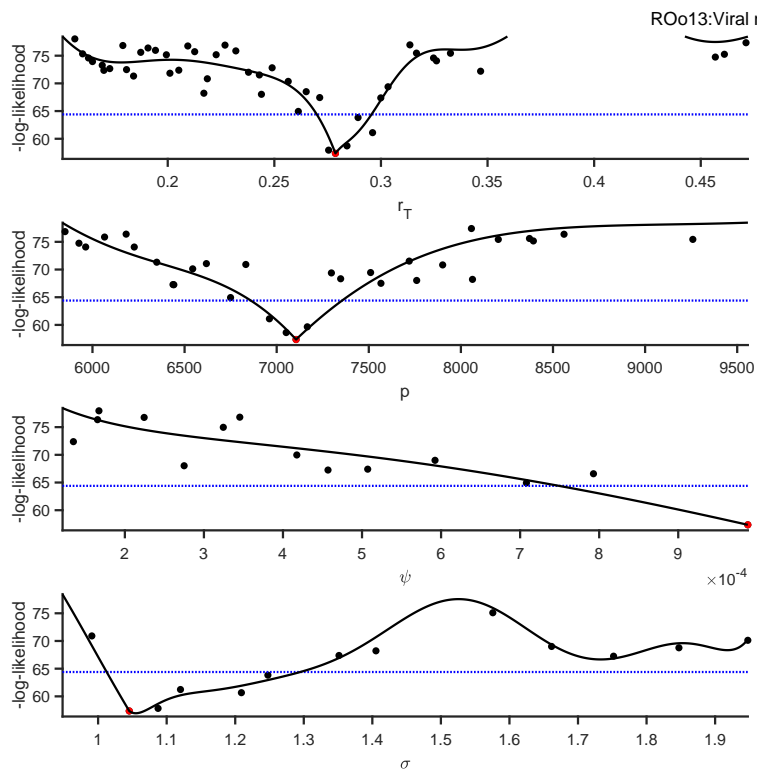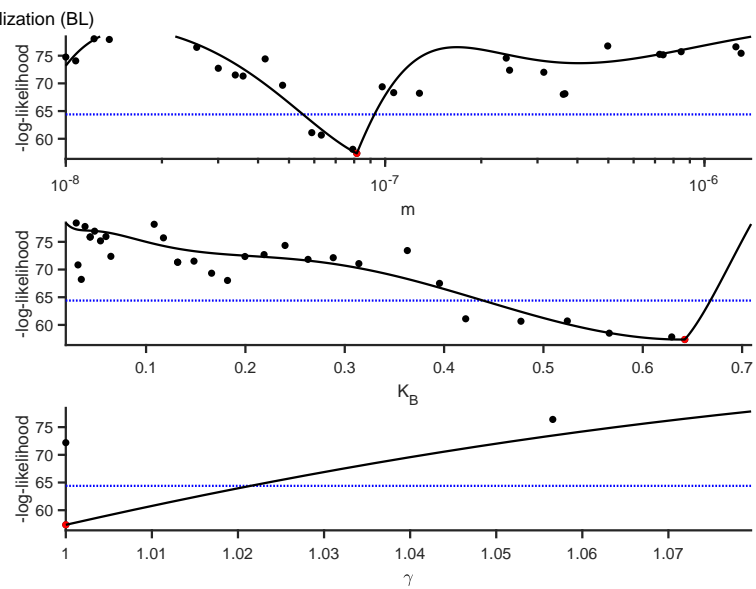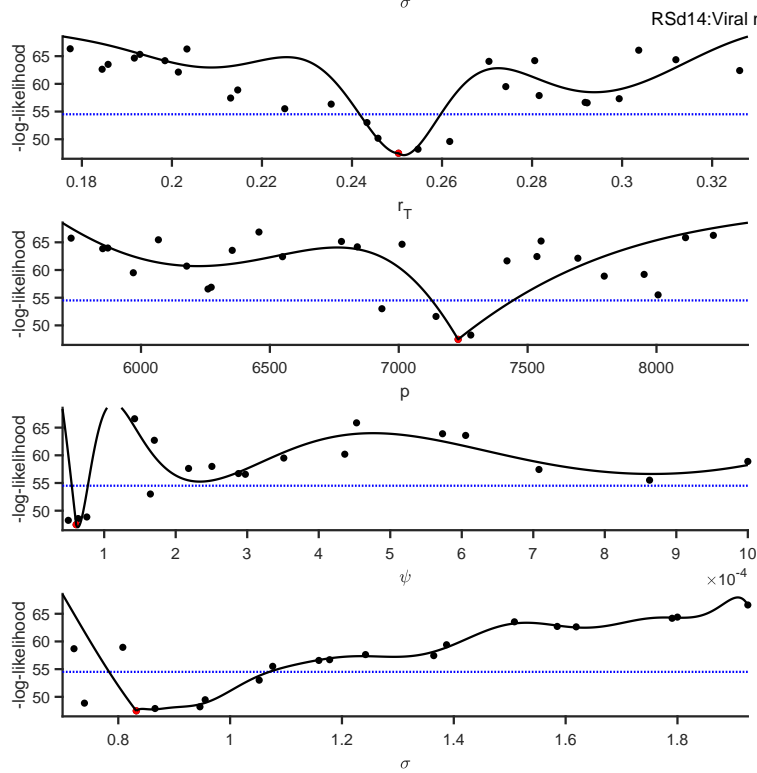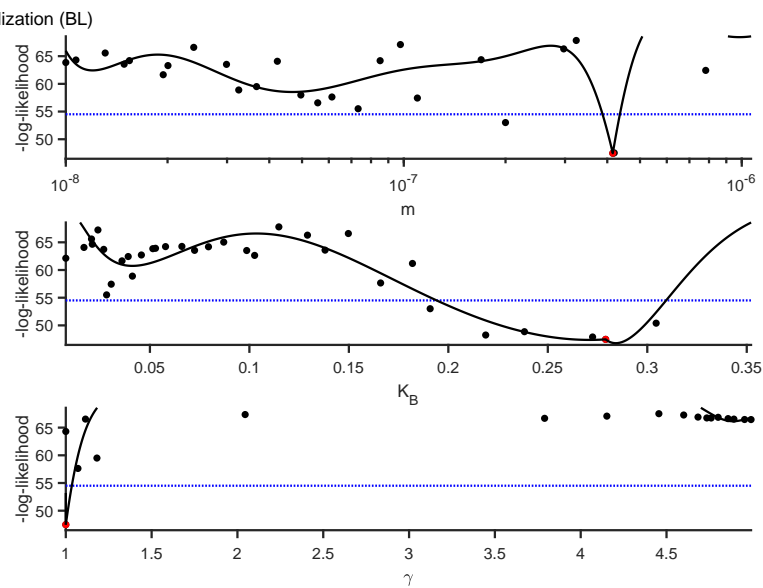

ROV14:Viral neutralization (BL)

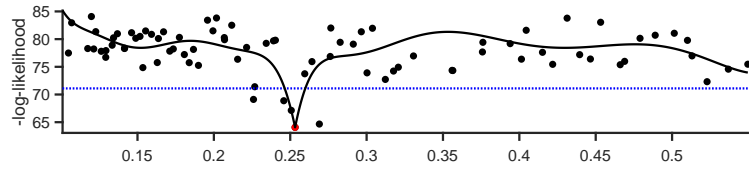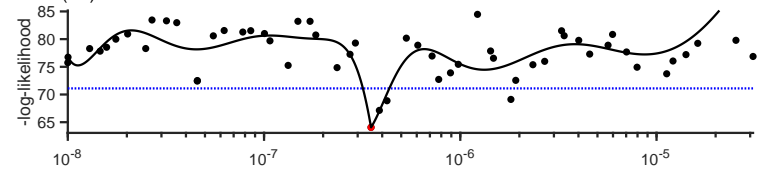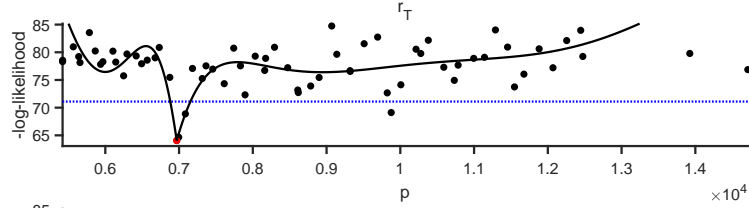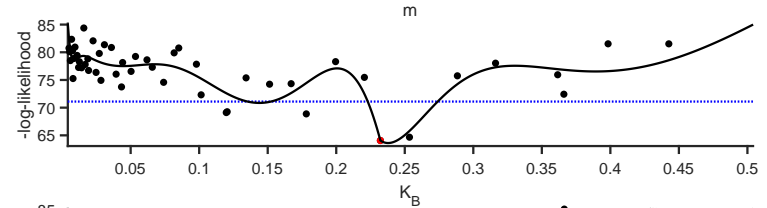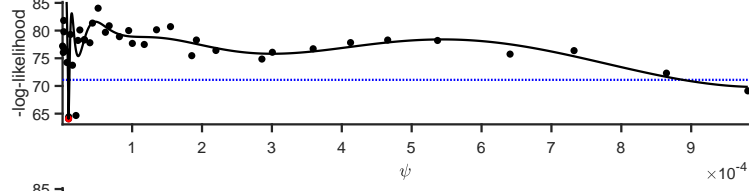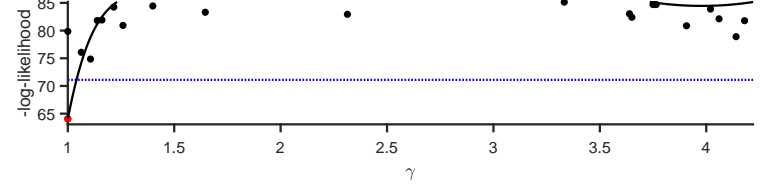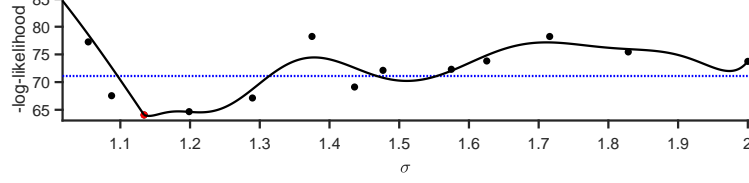

## 5.2 Saturated effector cell source model

ROq14:Viral neutralization (SS)

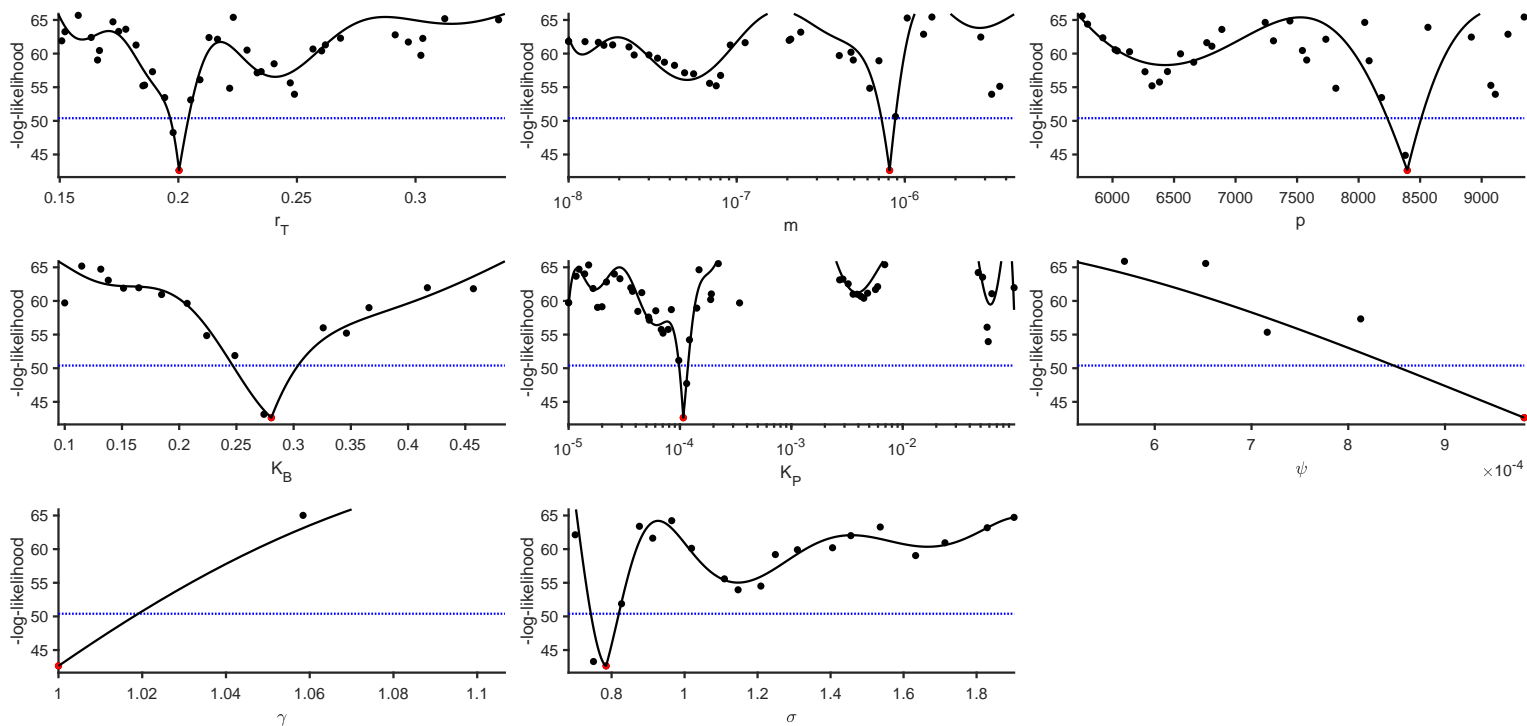

RDa15:Viral neutralization (SS)

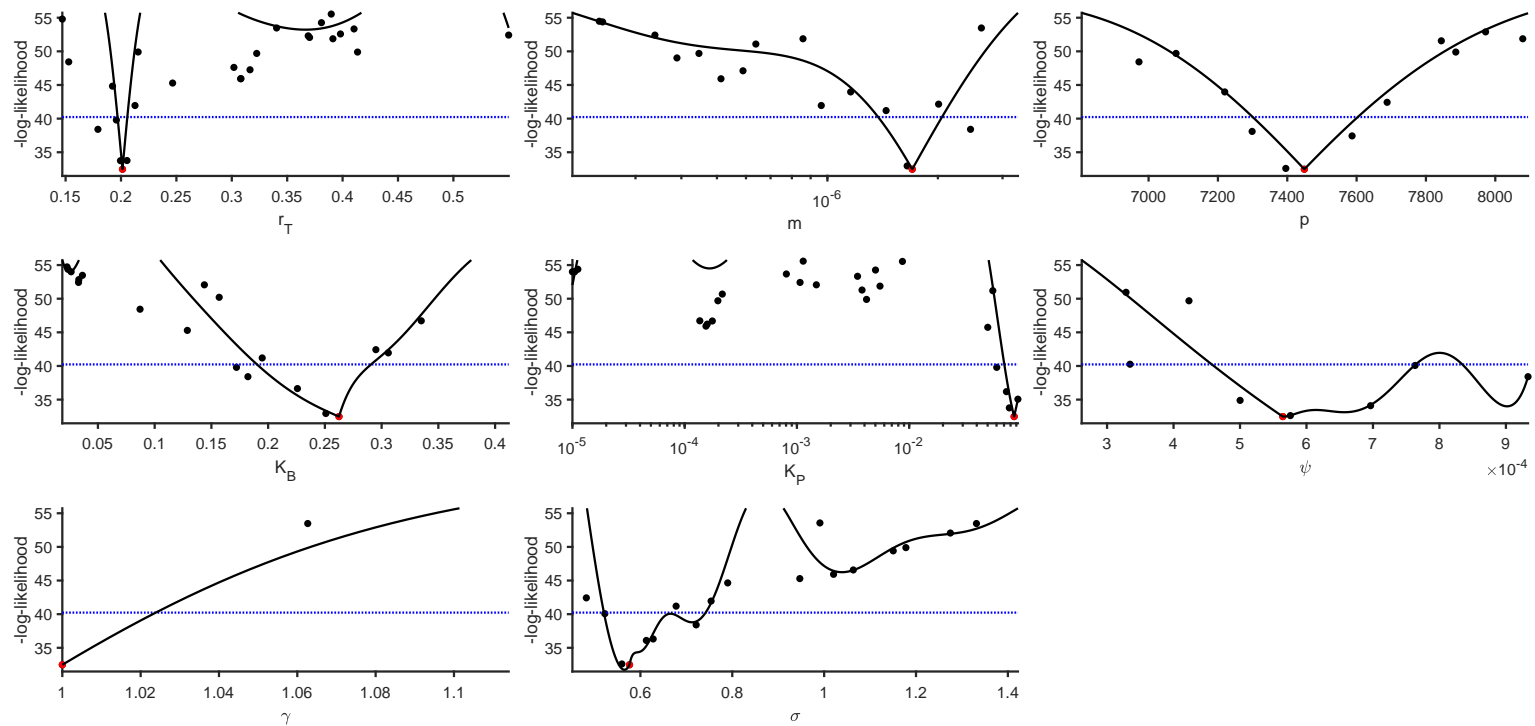

RFa15:Viral neutralization (SS)

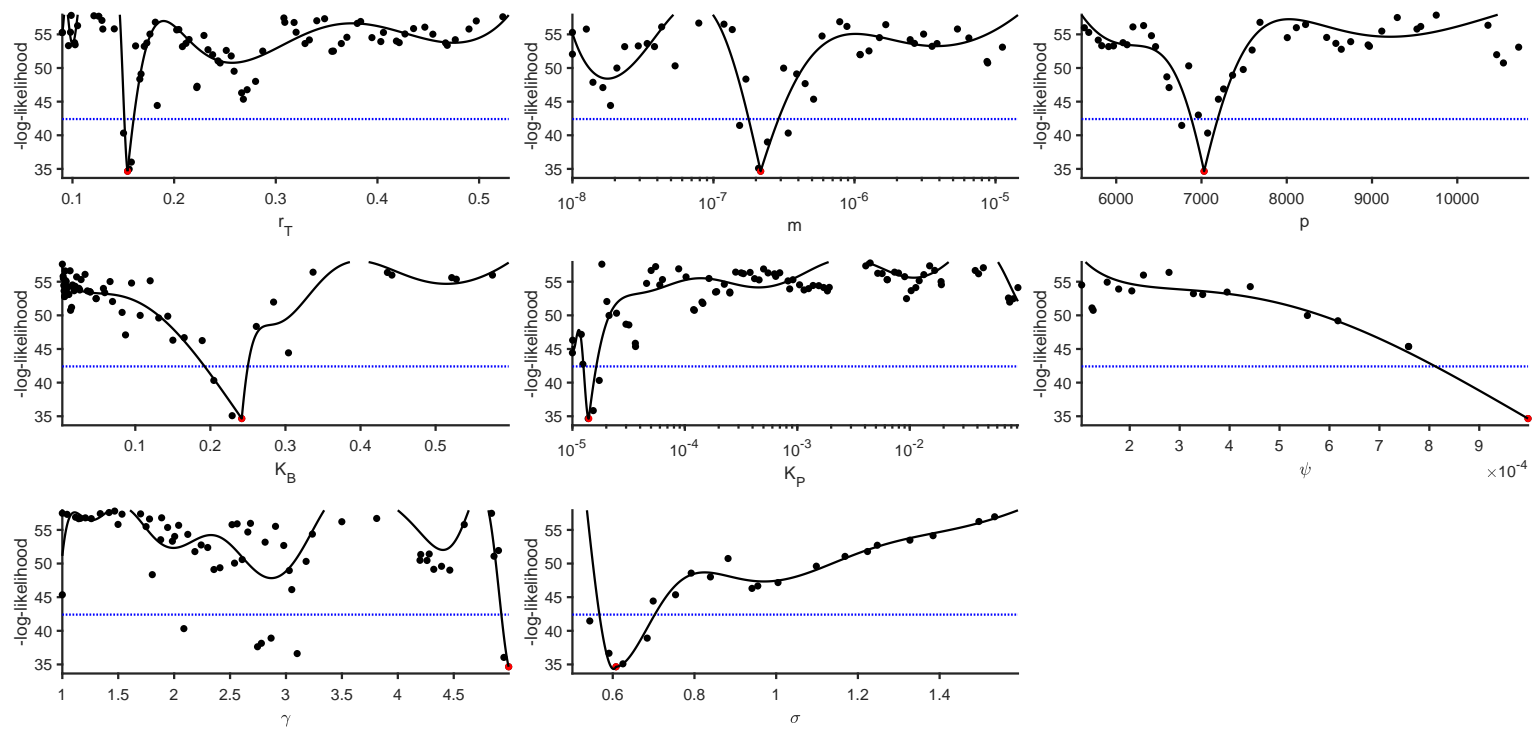

RLn12:Viral neutralization (SS)

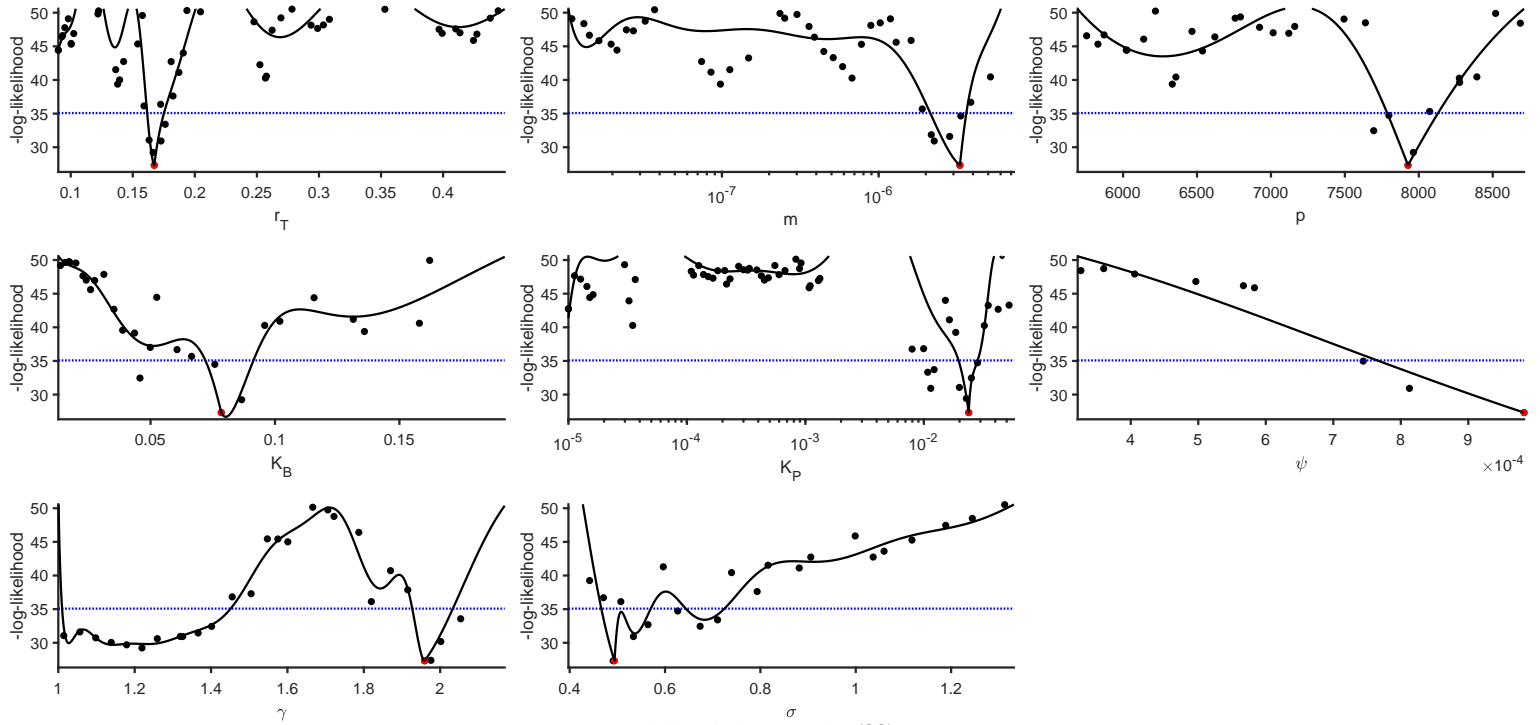

Rld14:Viral neutralization (SS)

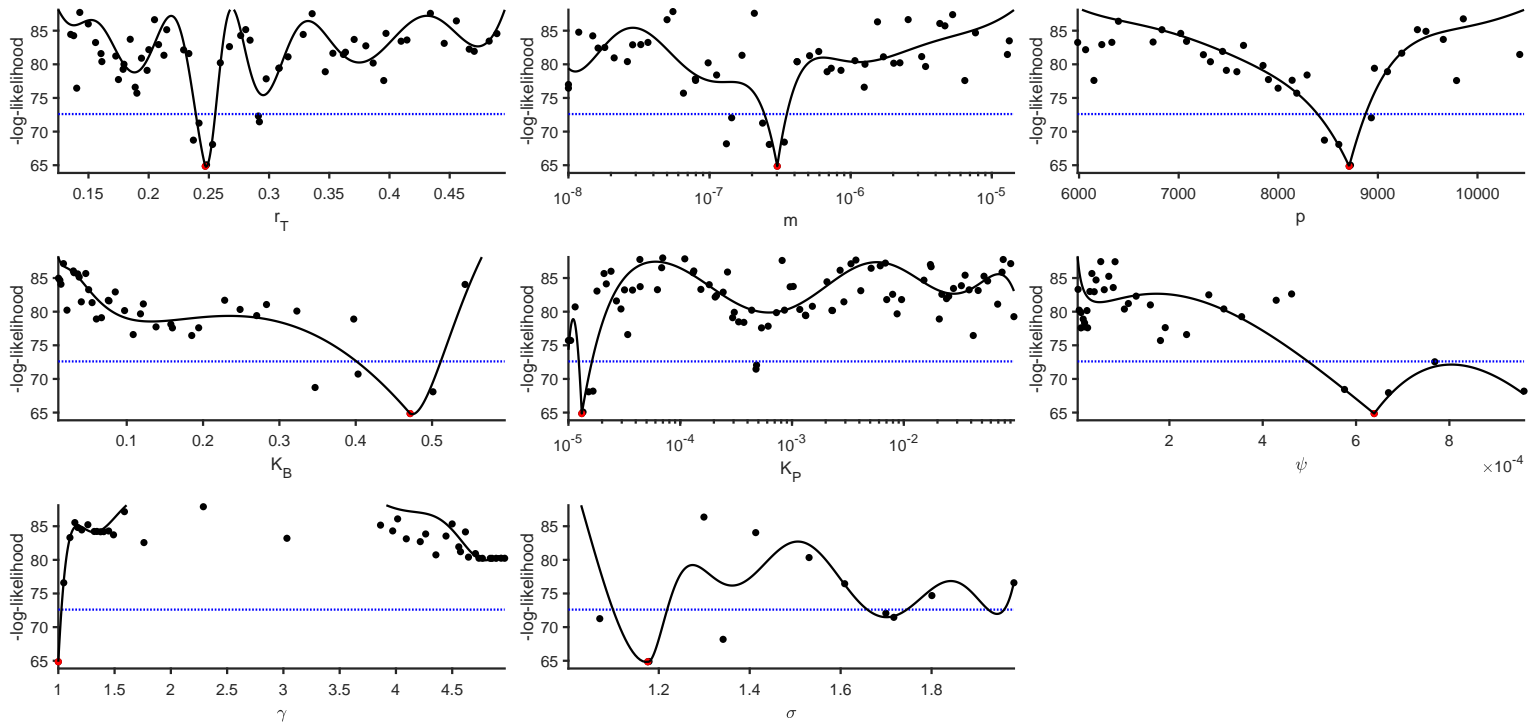

ROo13:Viral neutralization (SS)

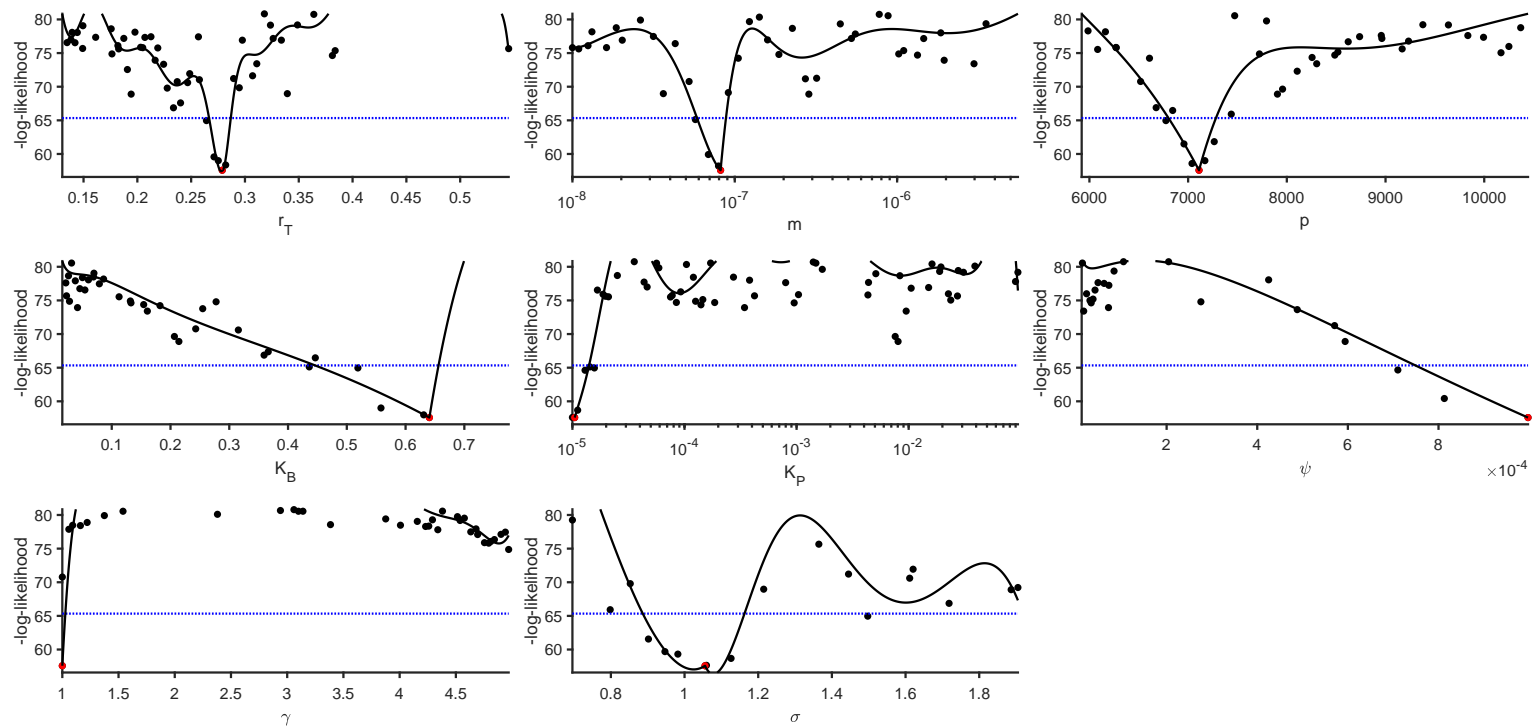

RSd14:Viral neutralization (SS)

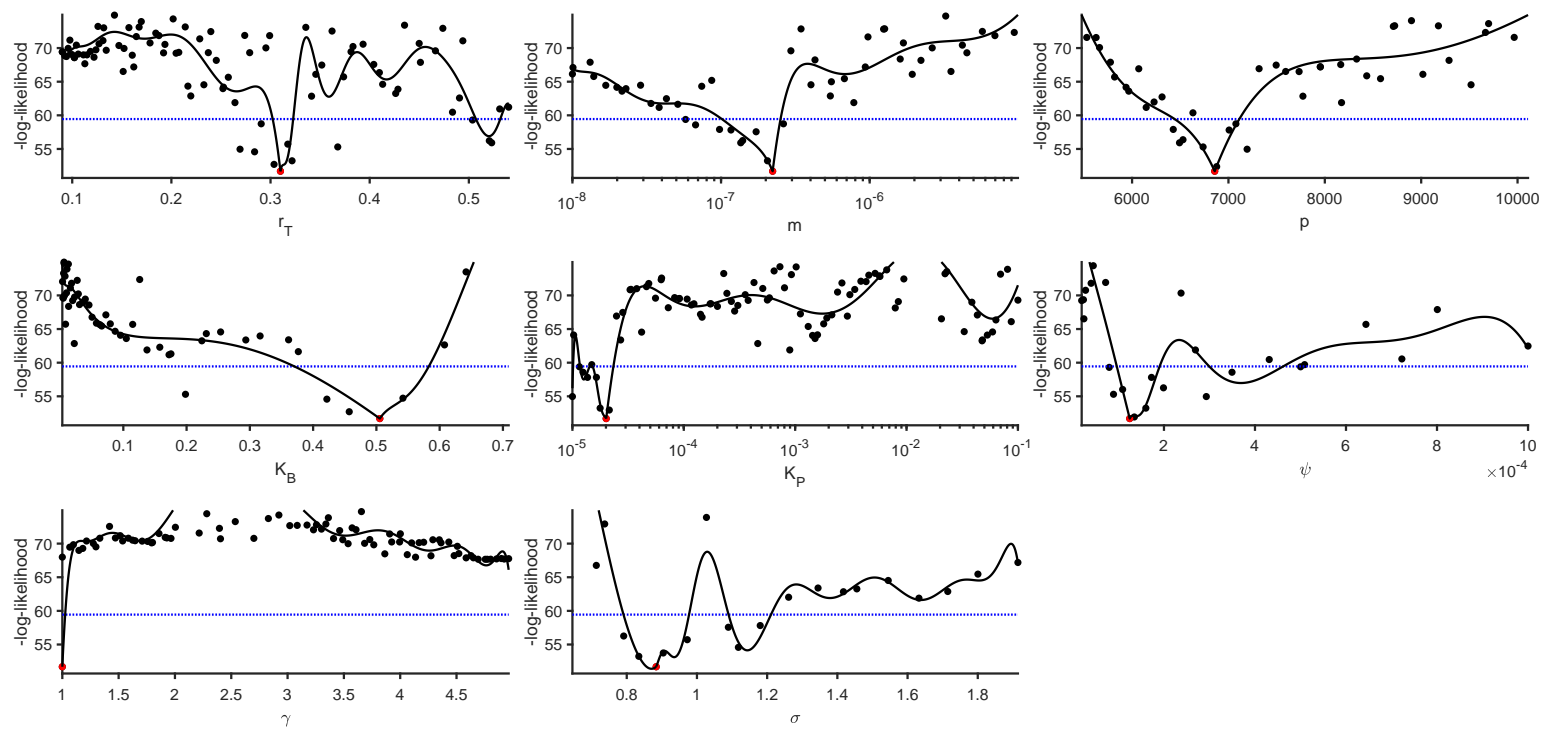



ROv14:Viral neutralization (SS)

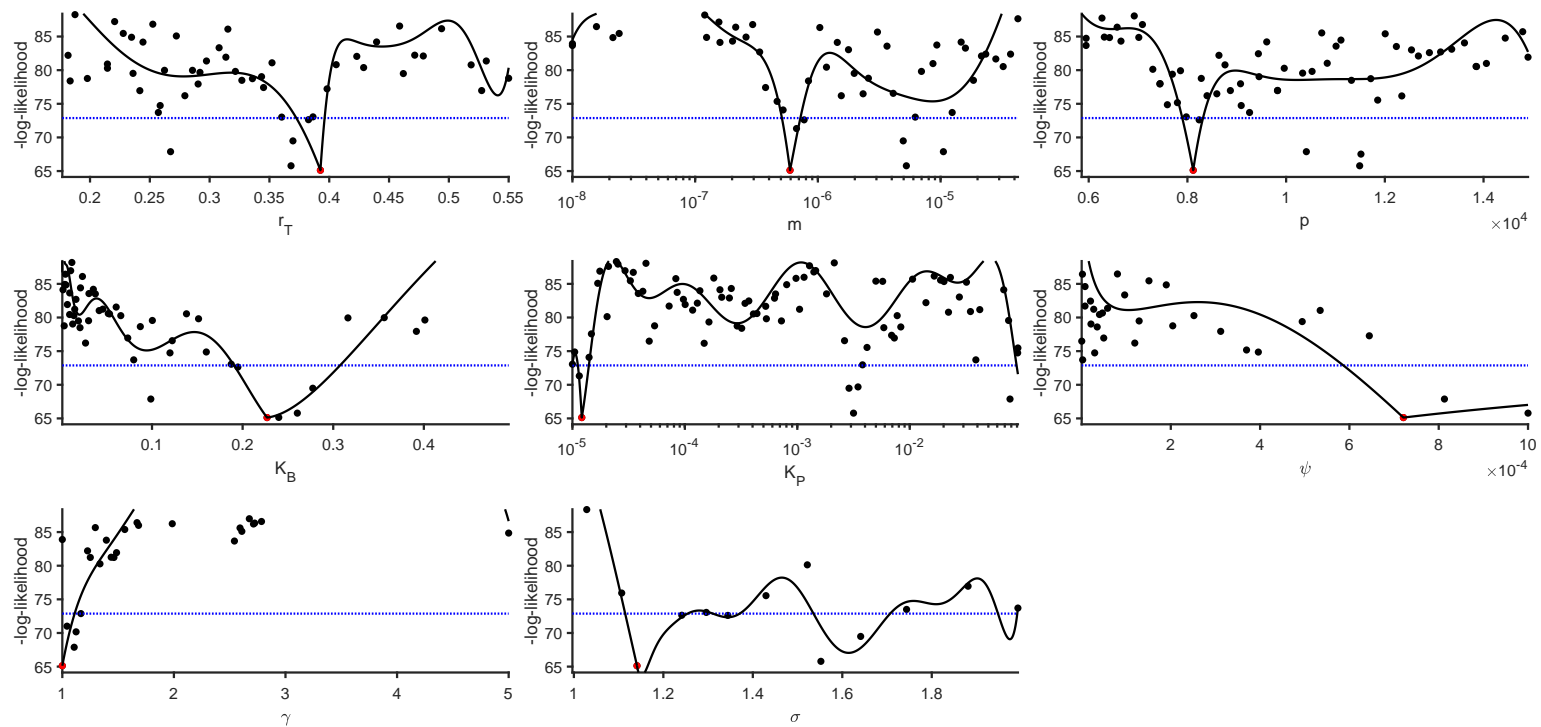

### 5.3 Antigen presenting cell effector cell source model

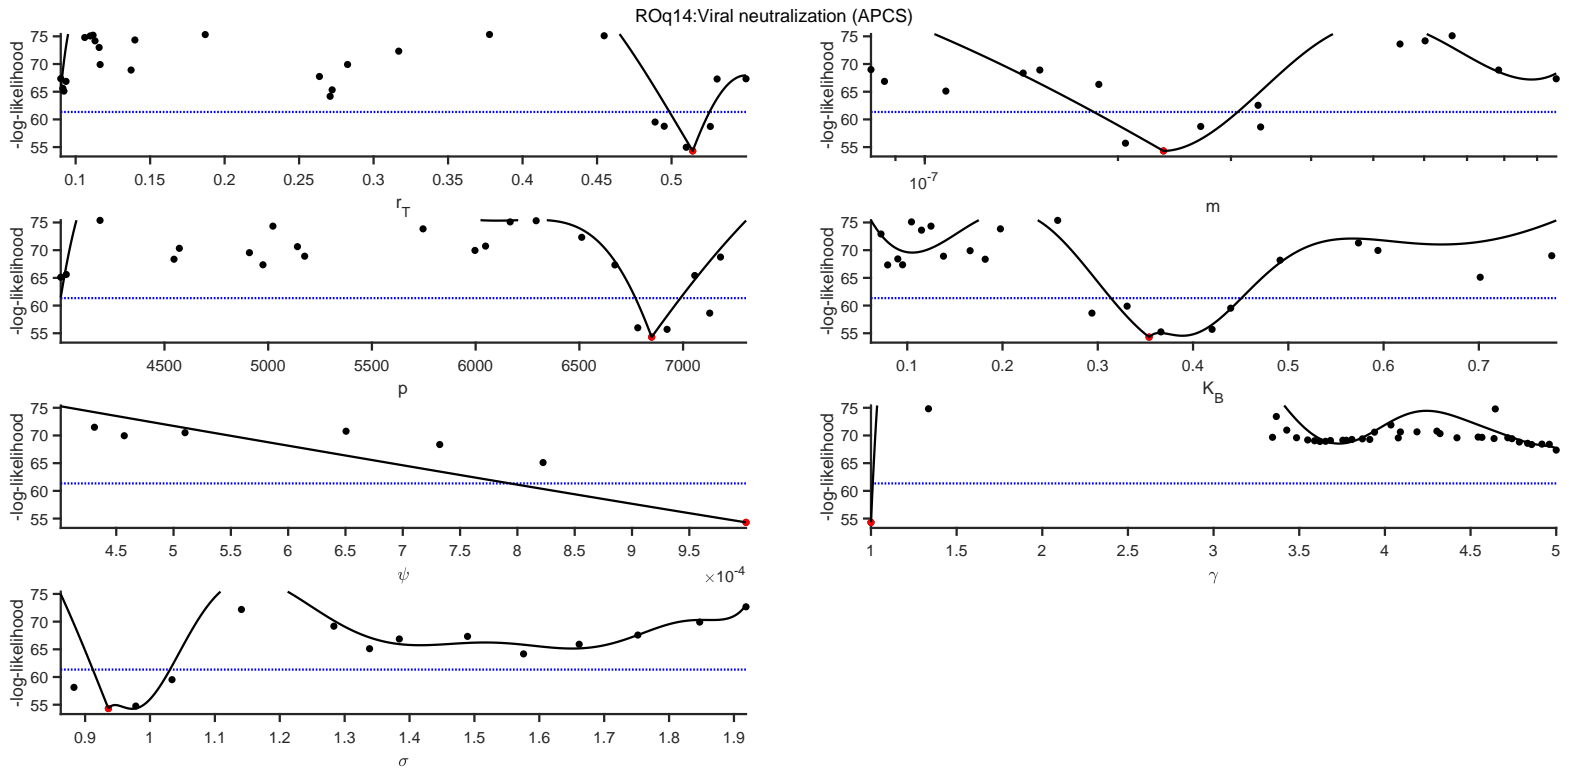

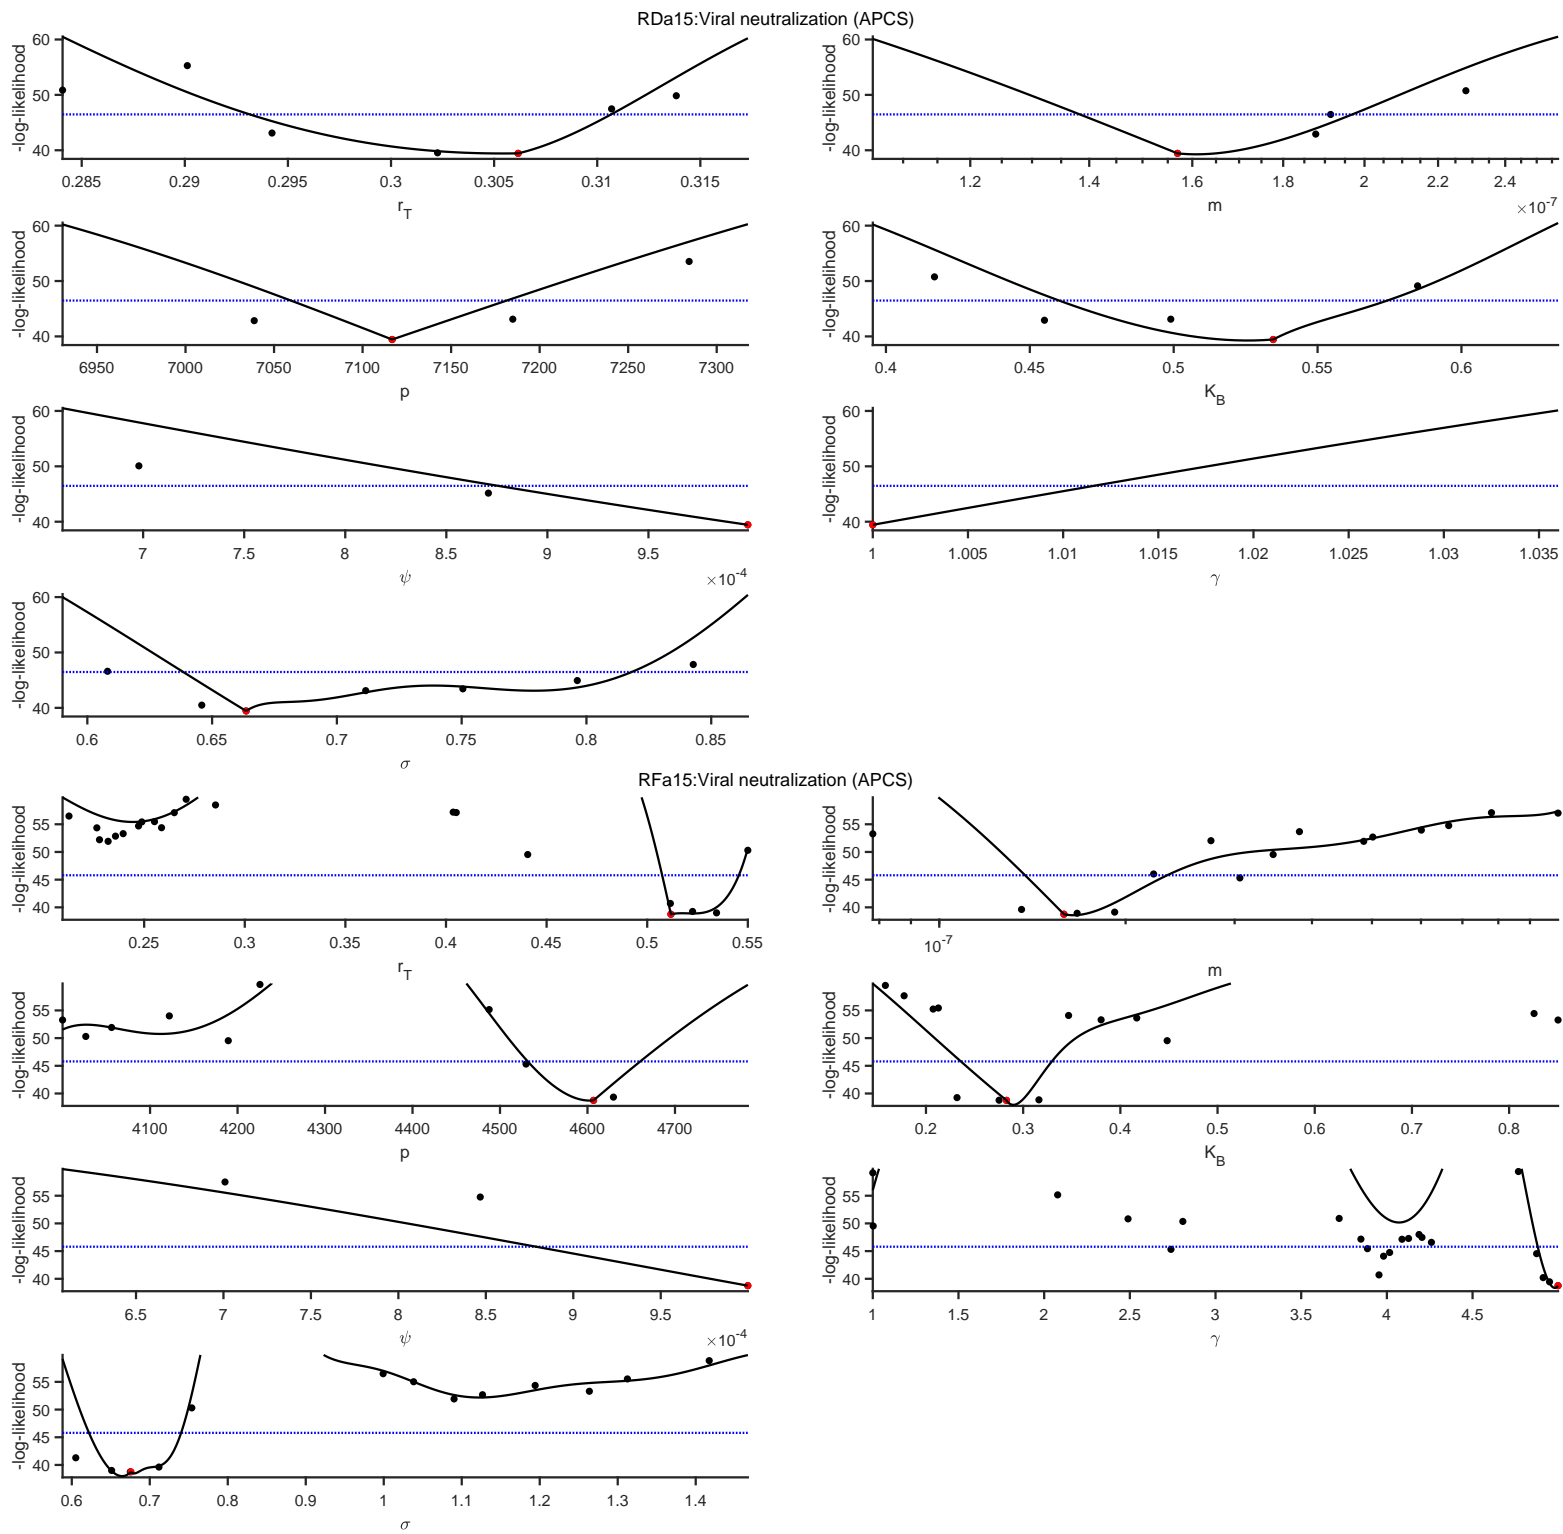

RLn12:Viral neutralization (APCS)

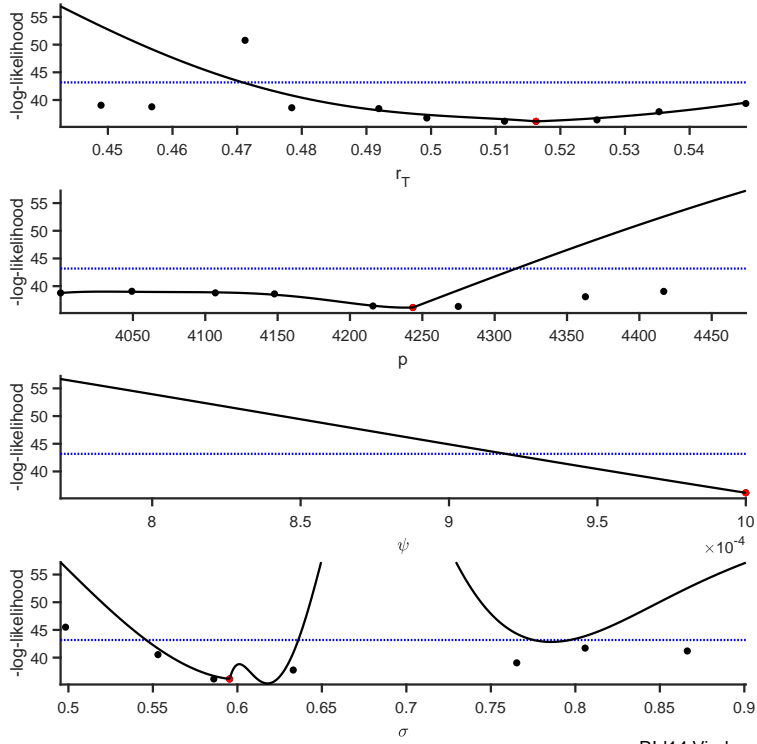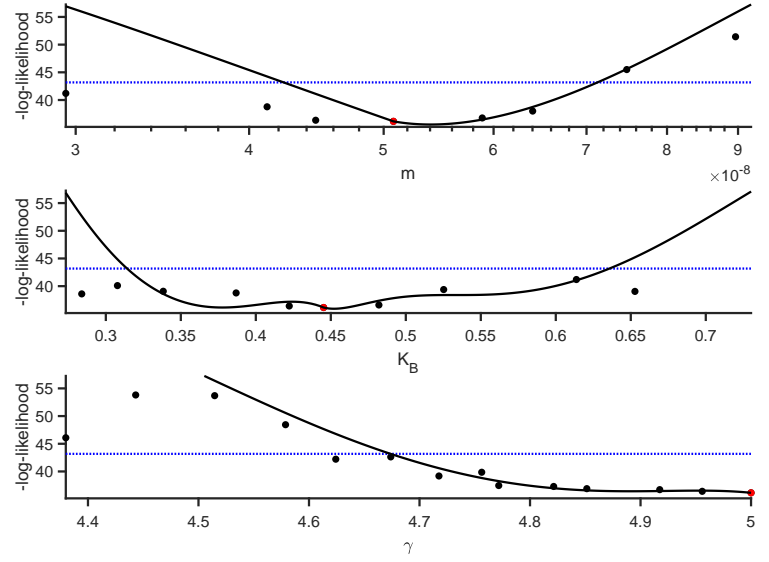

RId14:Viral neutralization (APCS)

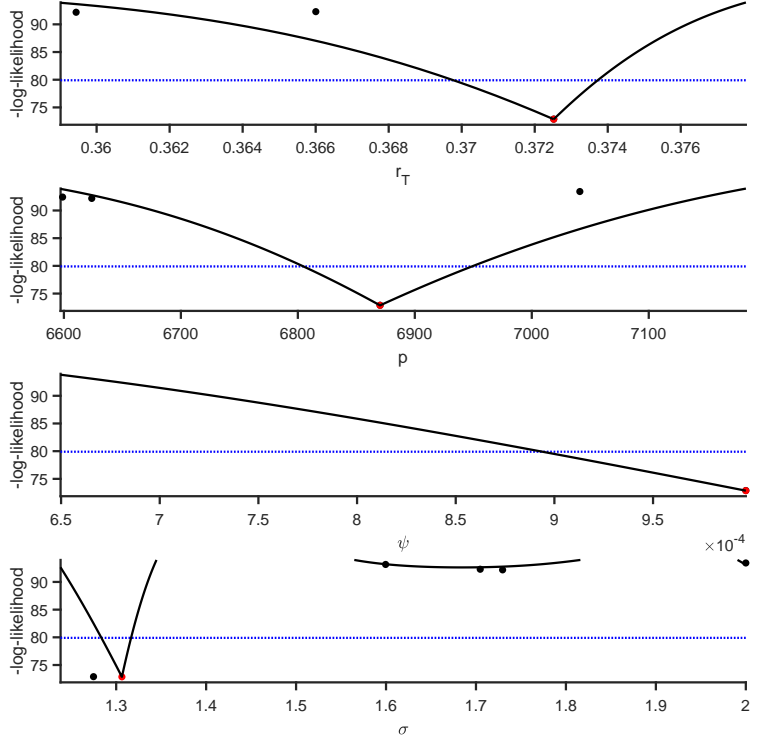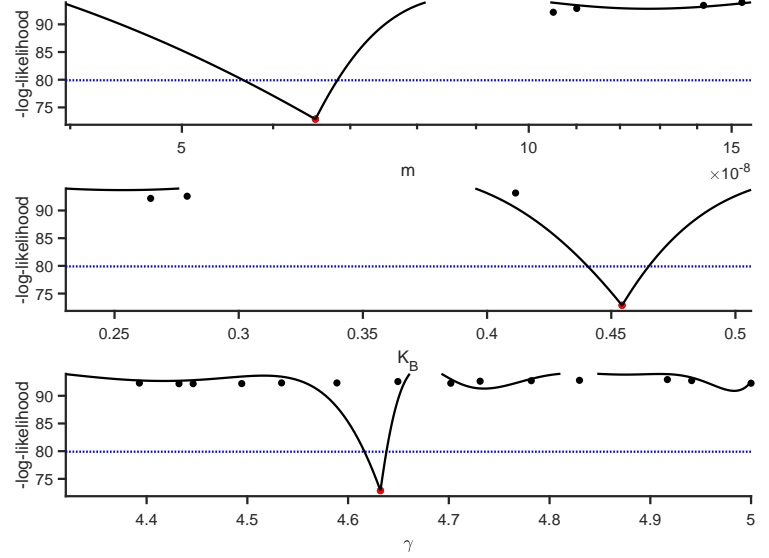

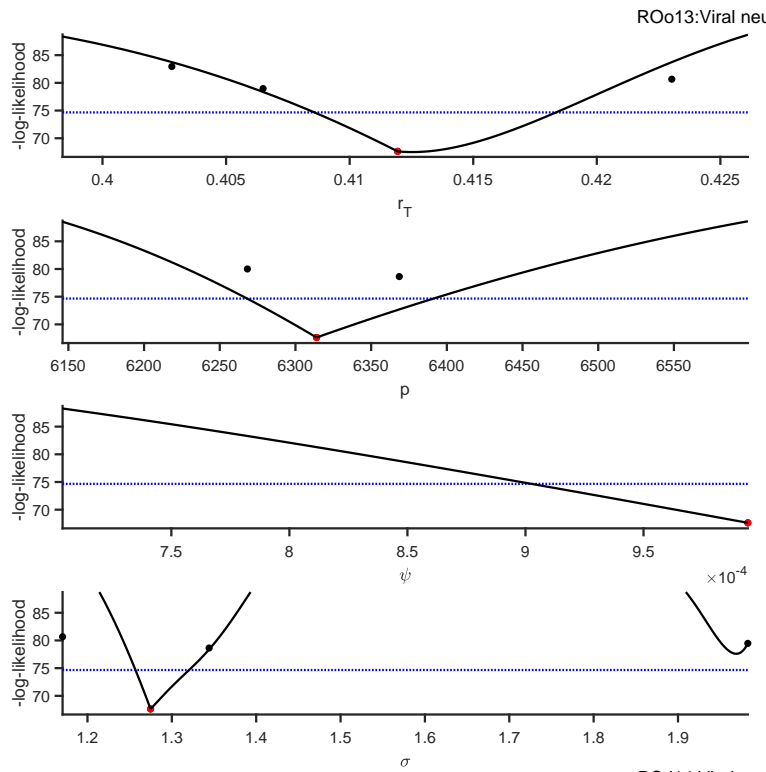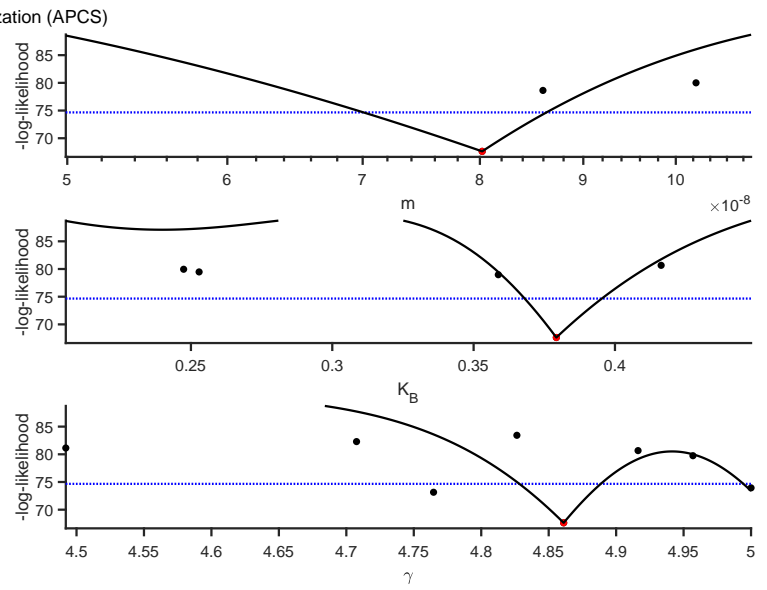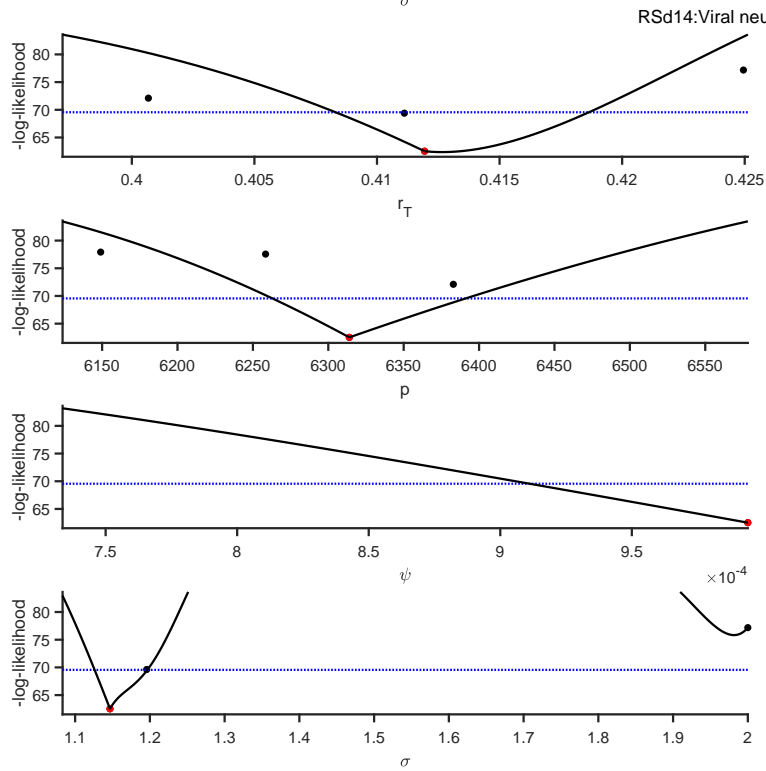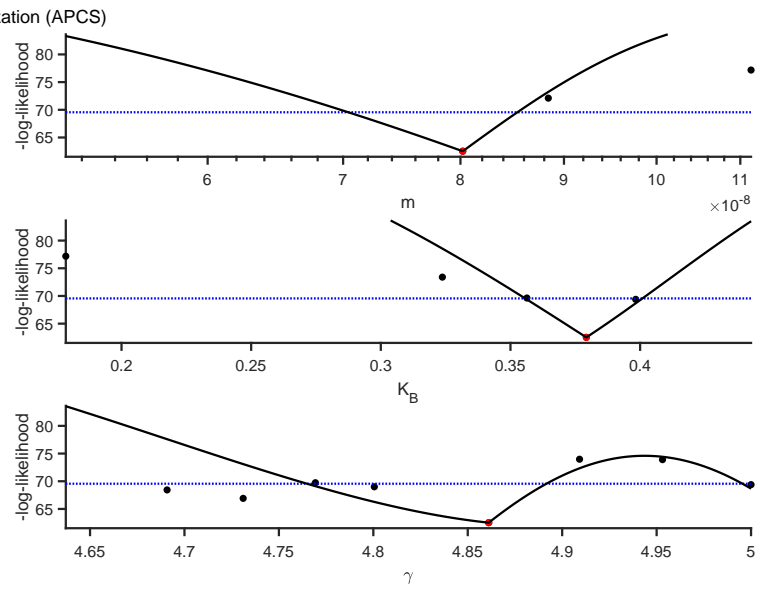

ROv14:Viral neutralization (APCS)

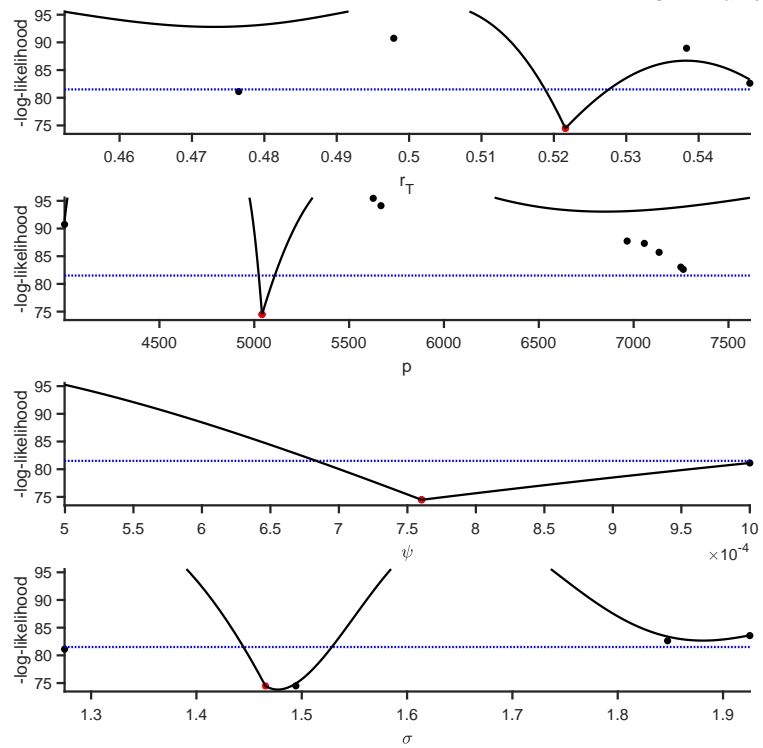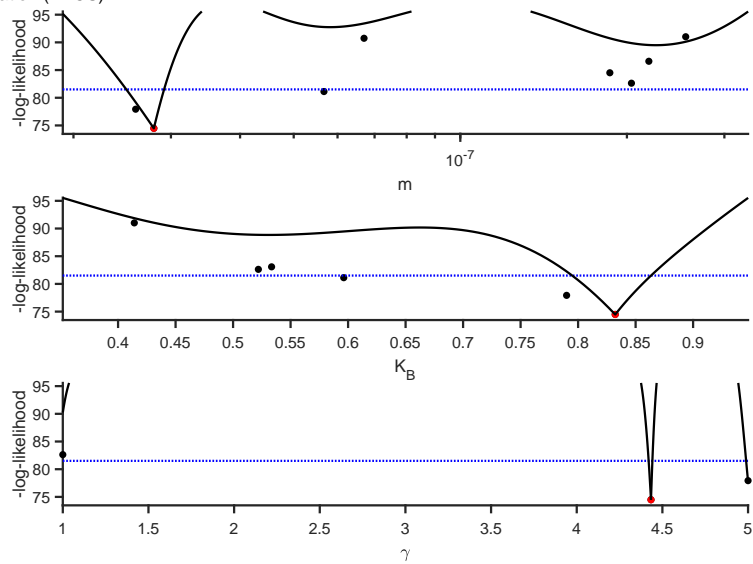

# 6 Sensitivity analysis: Viral neutralization

## 6.1 Baseline effector cell source model

ROq14:Viral neutralization (BL)

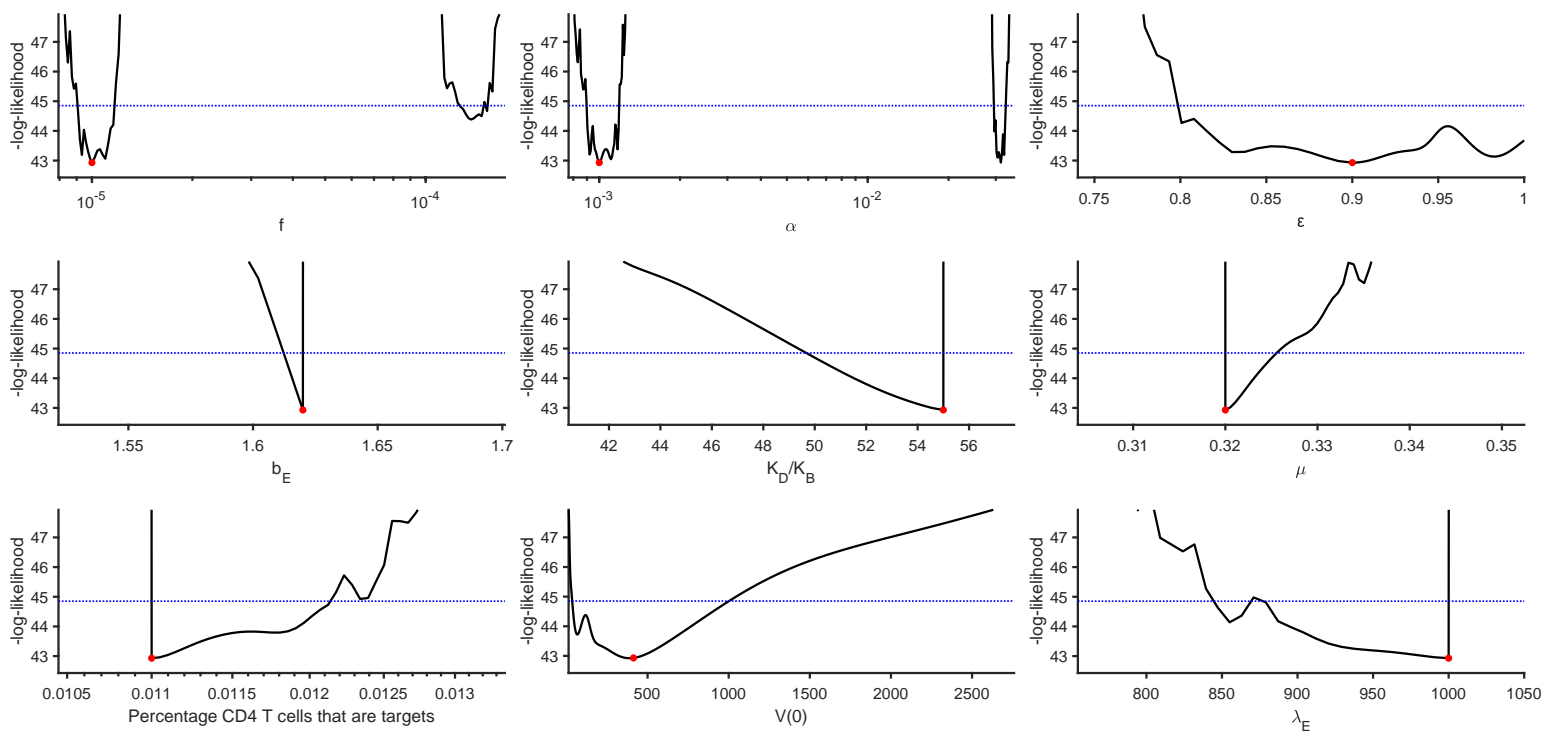

RDa15:Viral neutralization (BL)

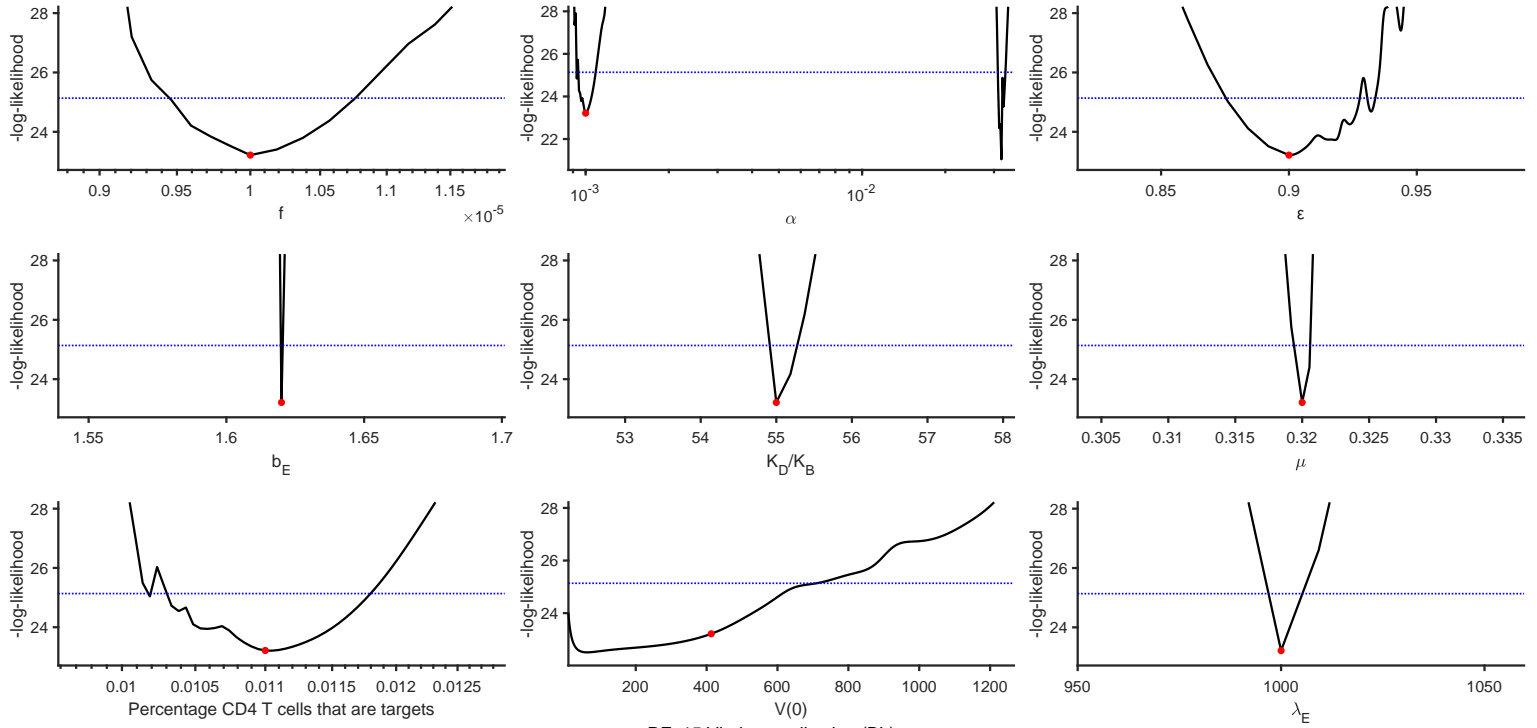

RFa15:Viral neutralization (BL)

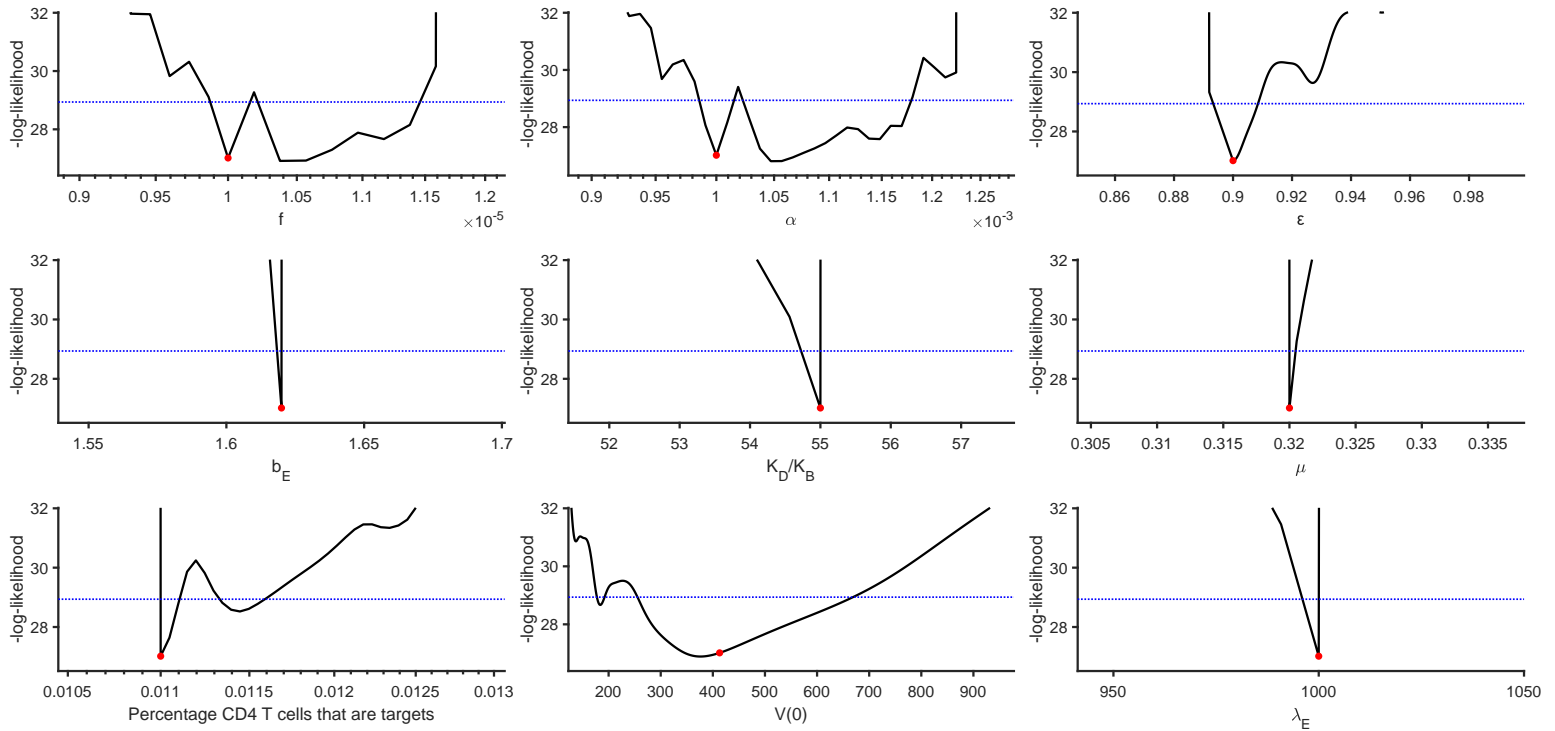



RLn12:Viral neutralization (BL)

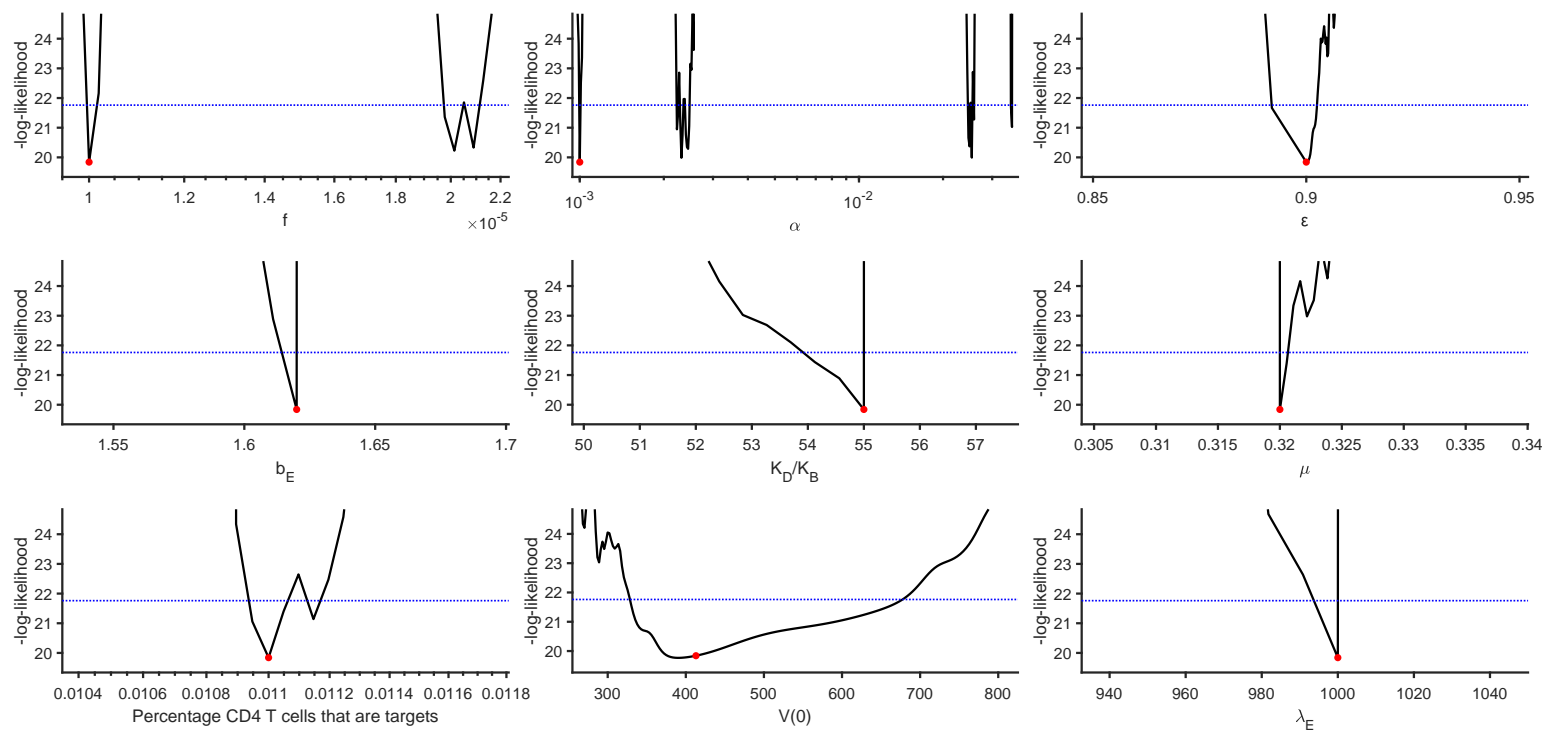

Rld14:Viral neutralization (BL)

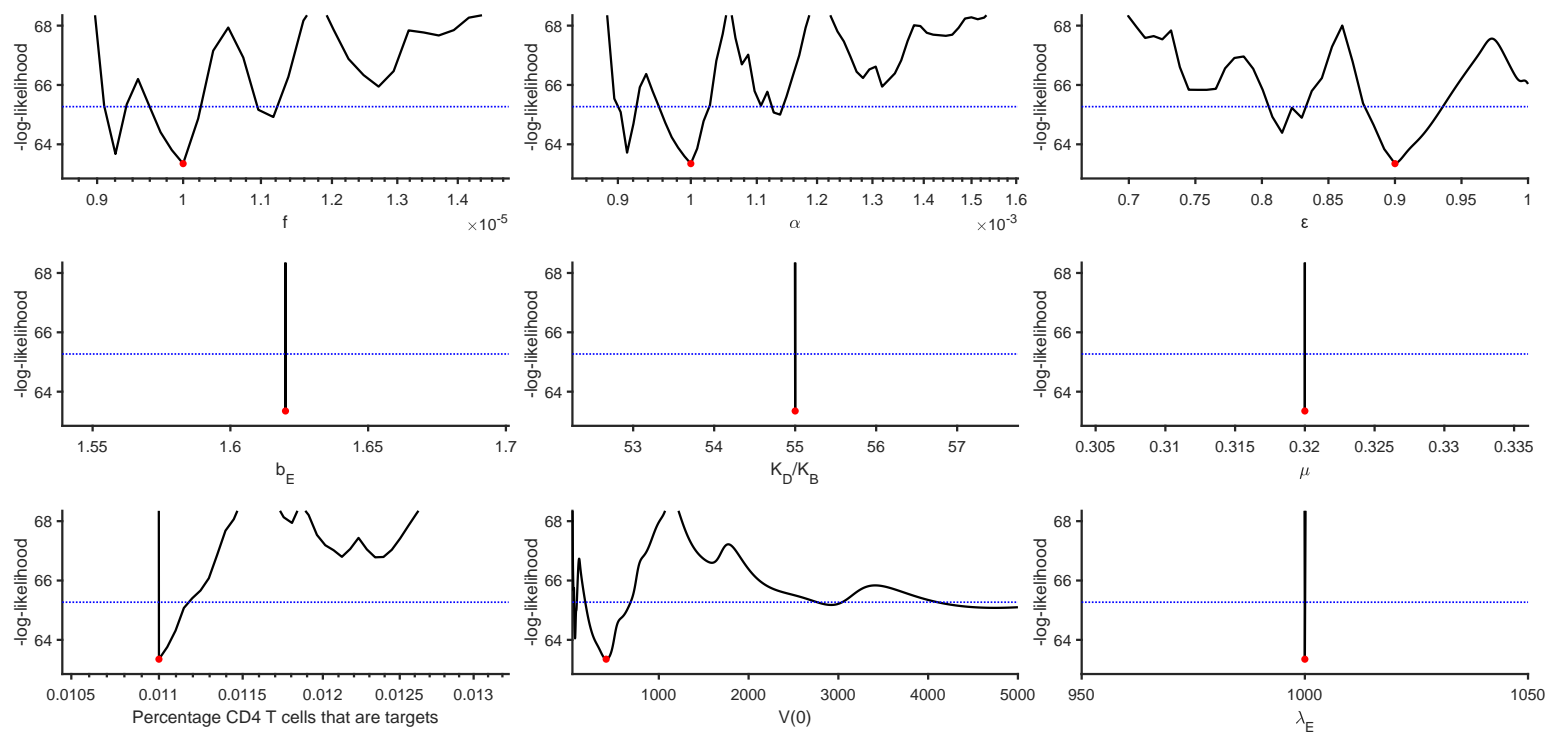

ROo13:Viral neutralization (BL)

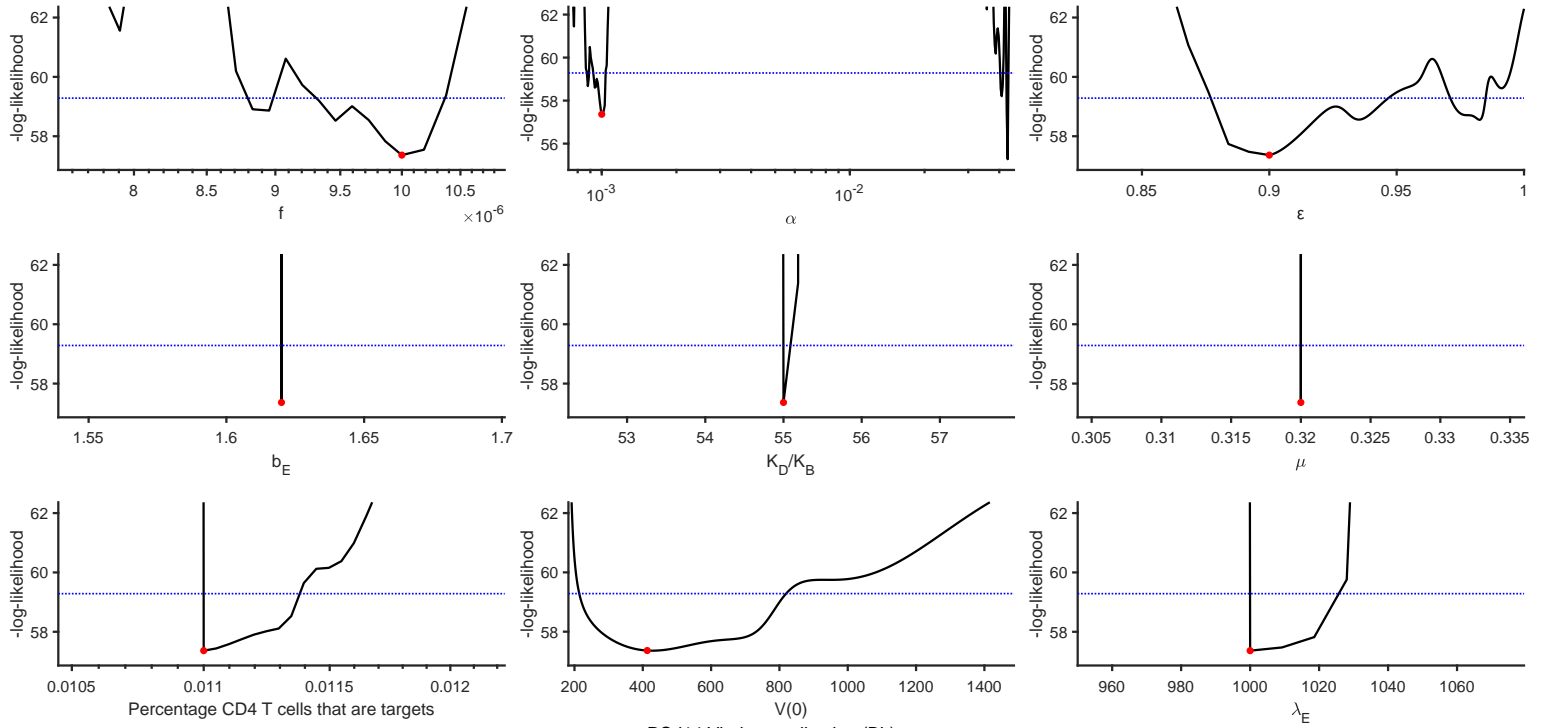

RSd14:Viral neutralization (BL)

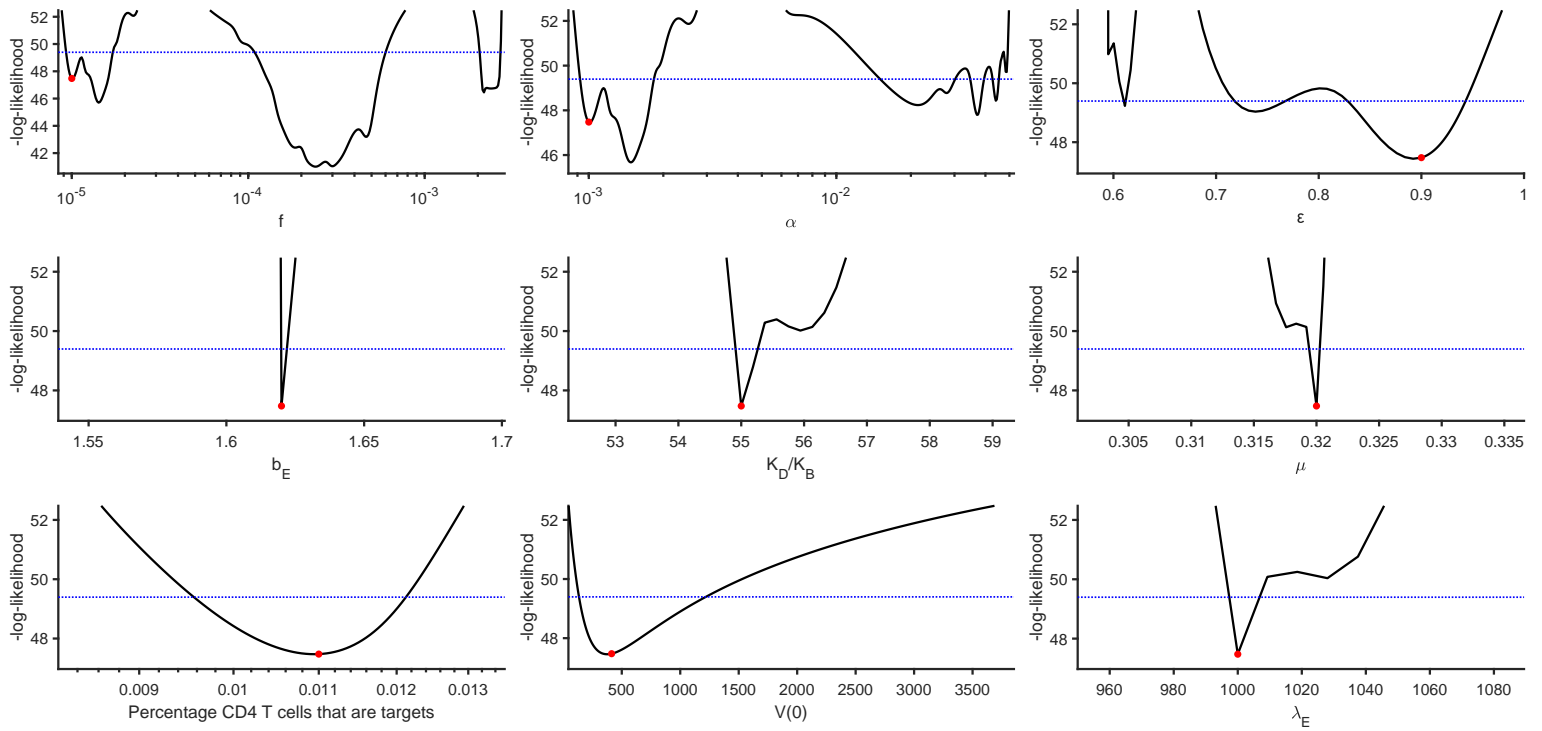

ROv14:Viral neutralization (BL)

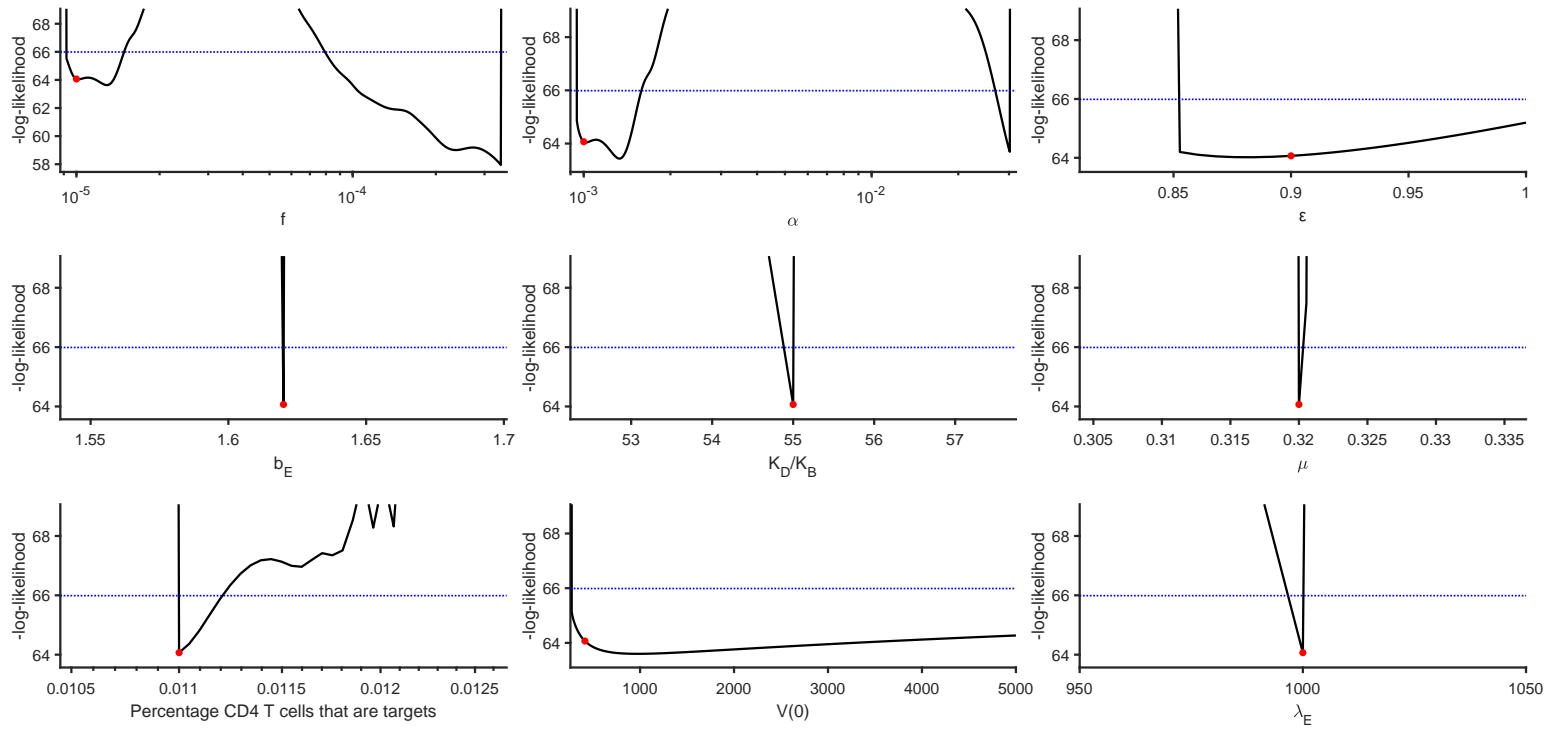

## 6.2 Saturated effector cell source model

ROq14:Viral neutralization (SS)

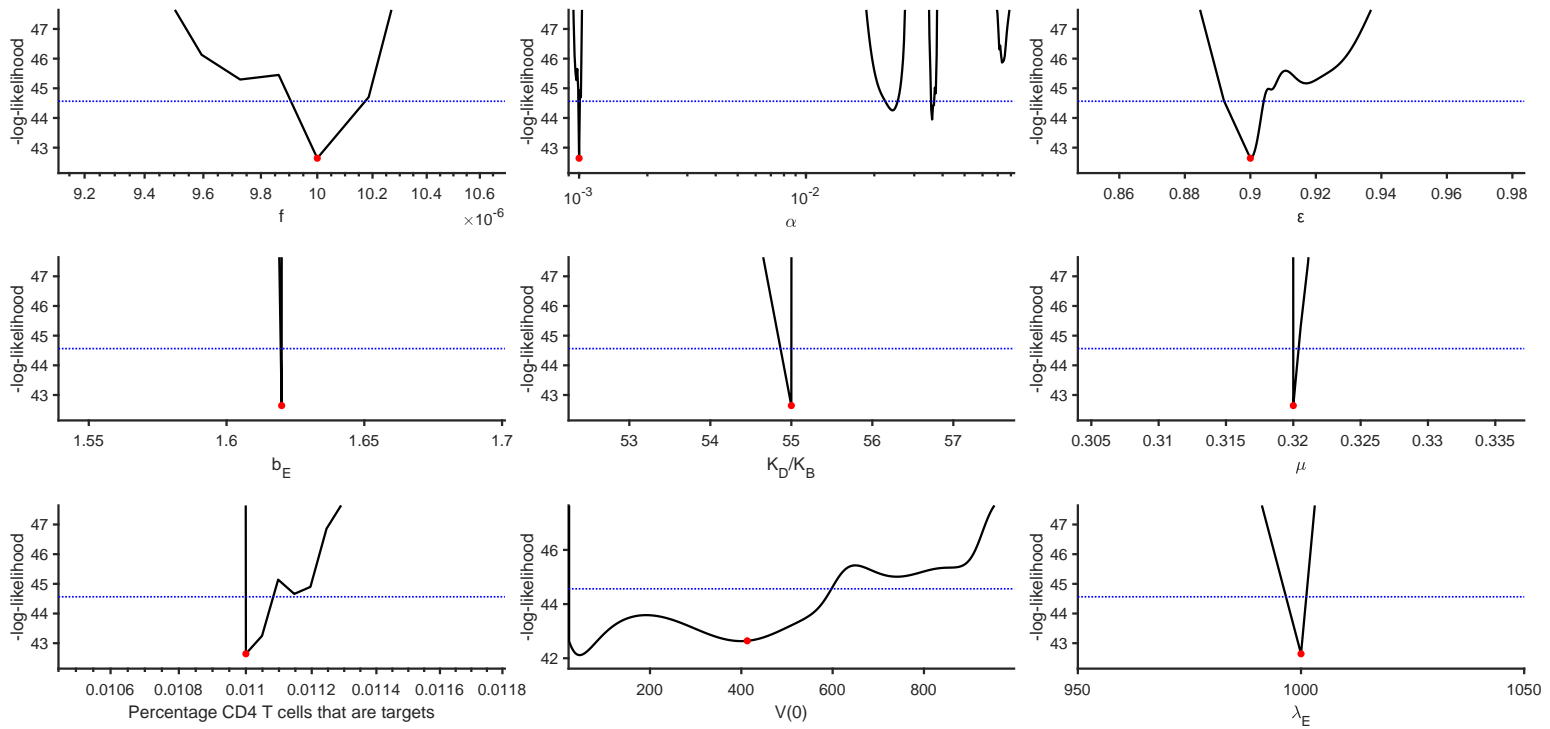

RDa15:Viral neutralization (SS)

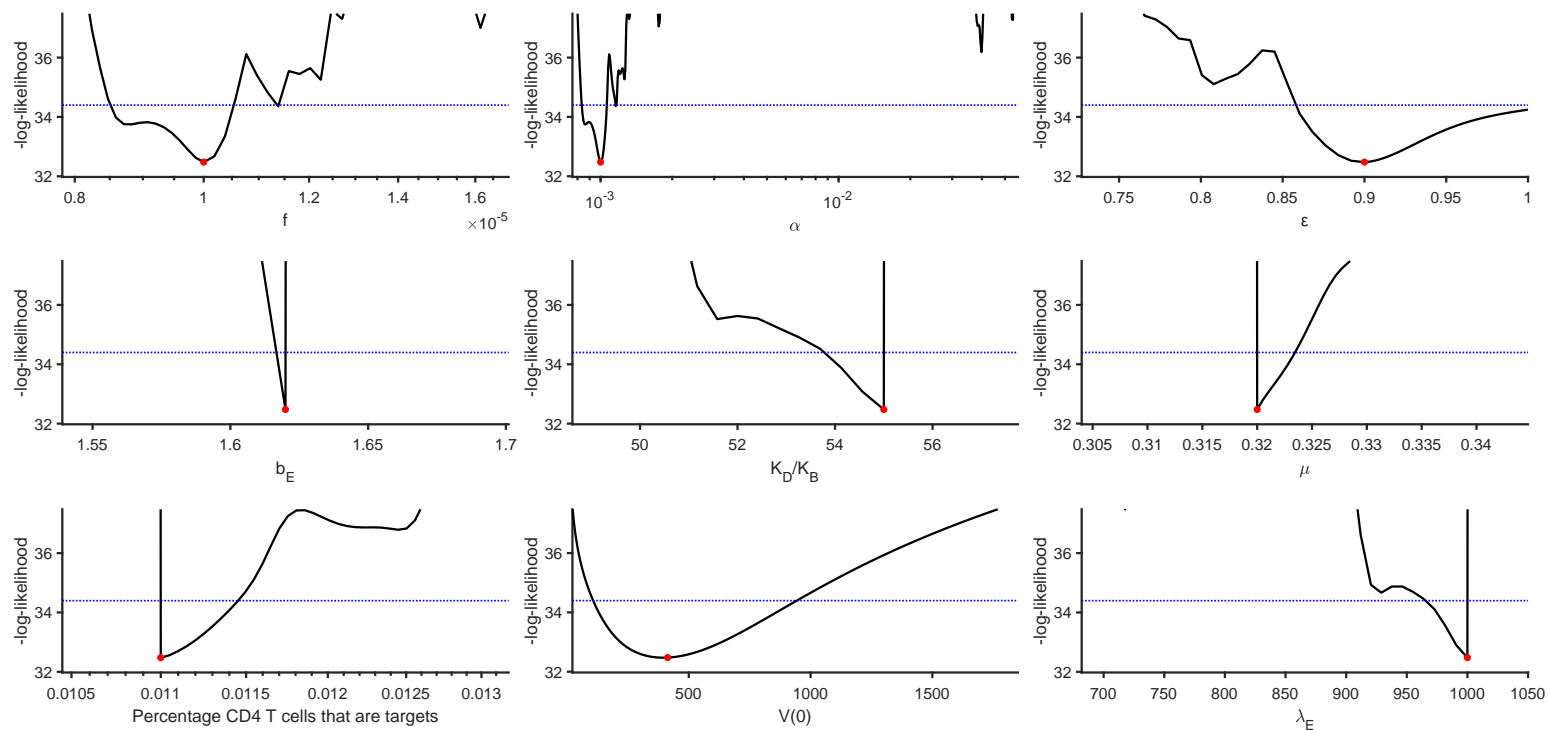

RFa15:Viral neutralization (SS)

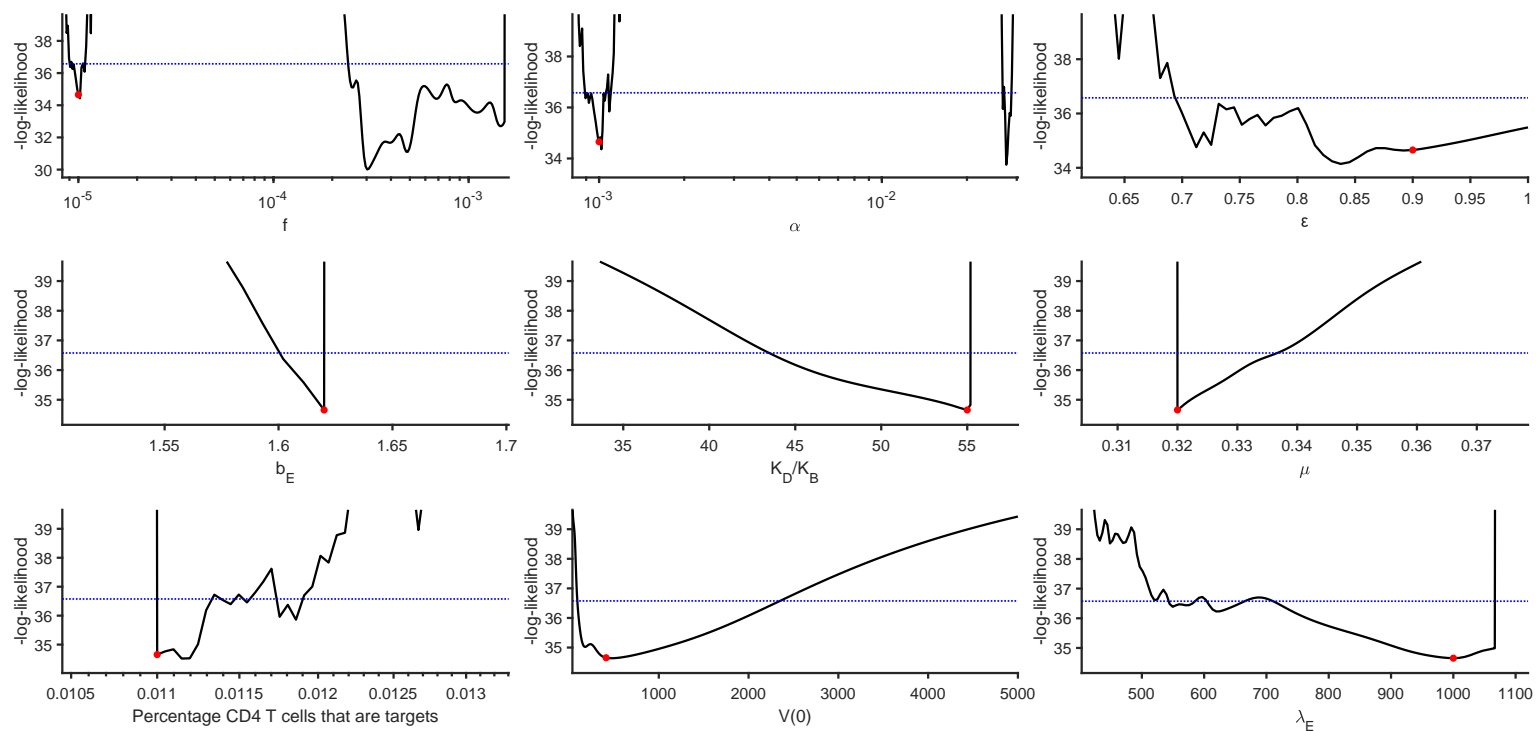

Rln12:Viral neutralization (SS)

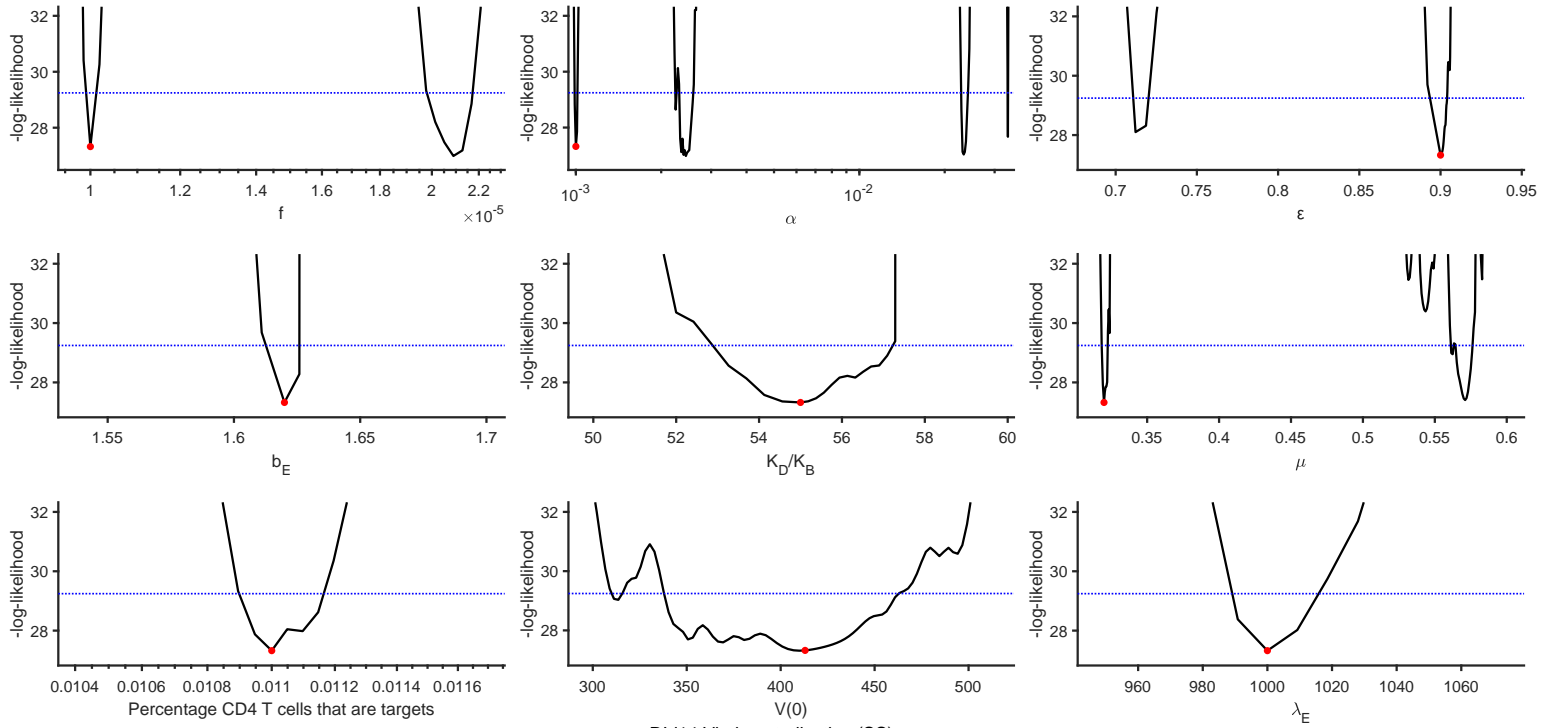

Rld14:Viral neutralization (SS)

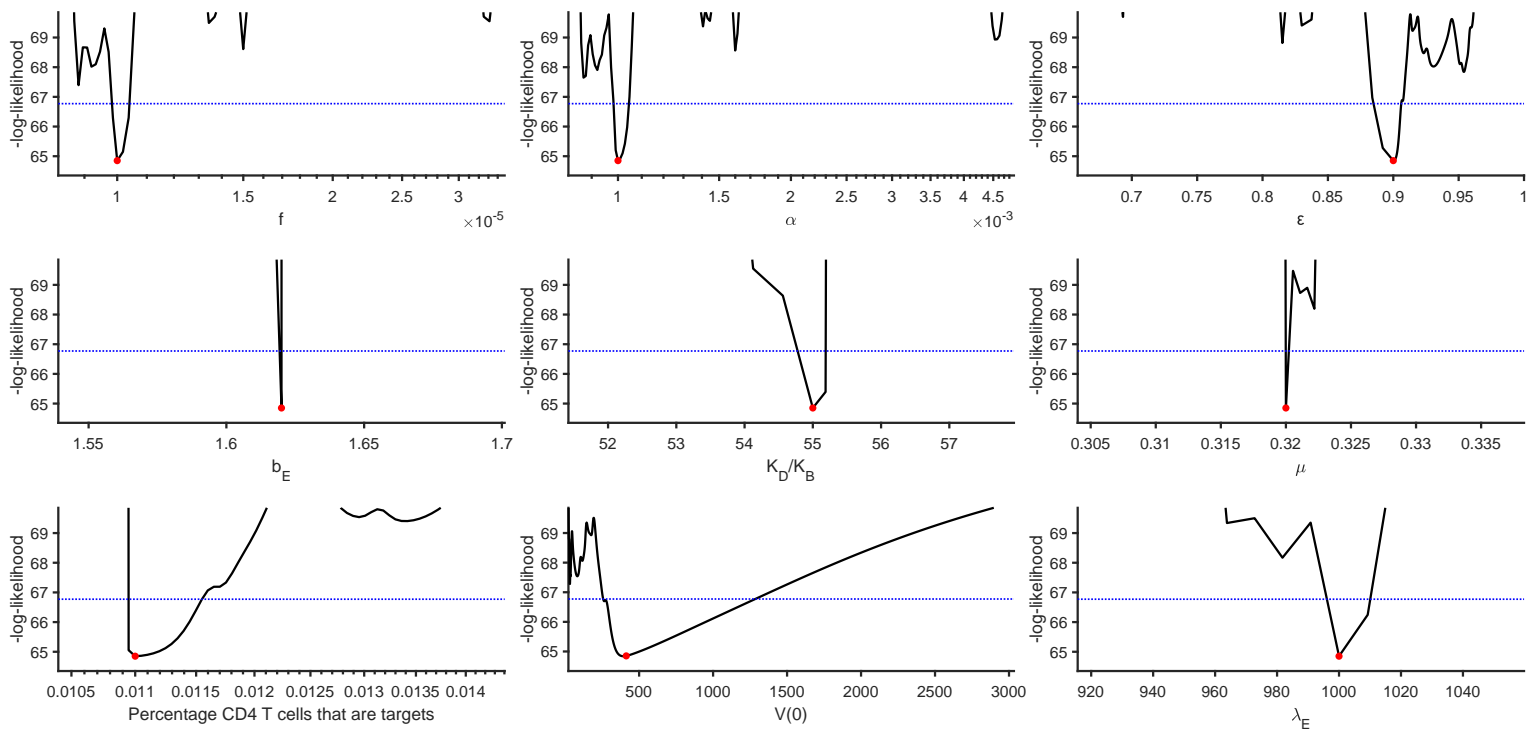

ROo13:Viral neutralization (SS)

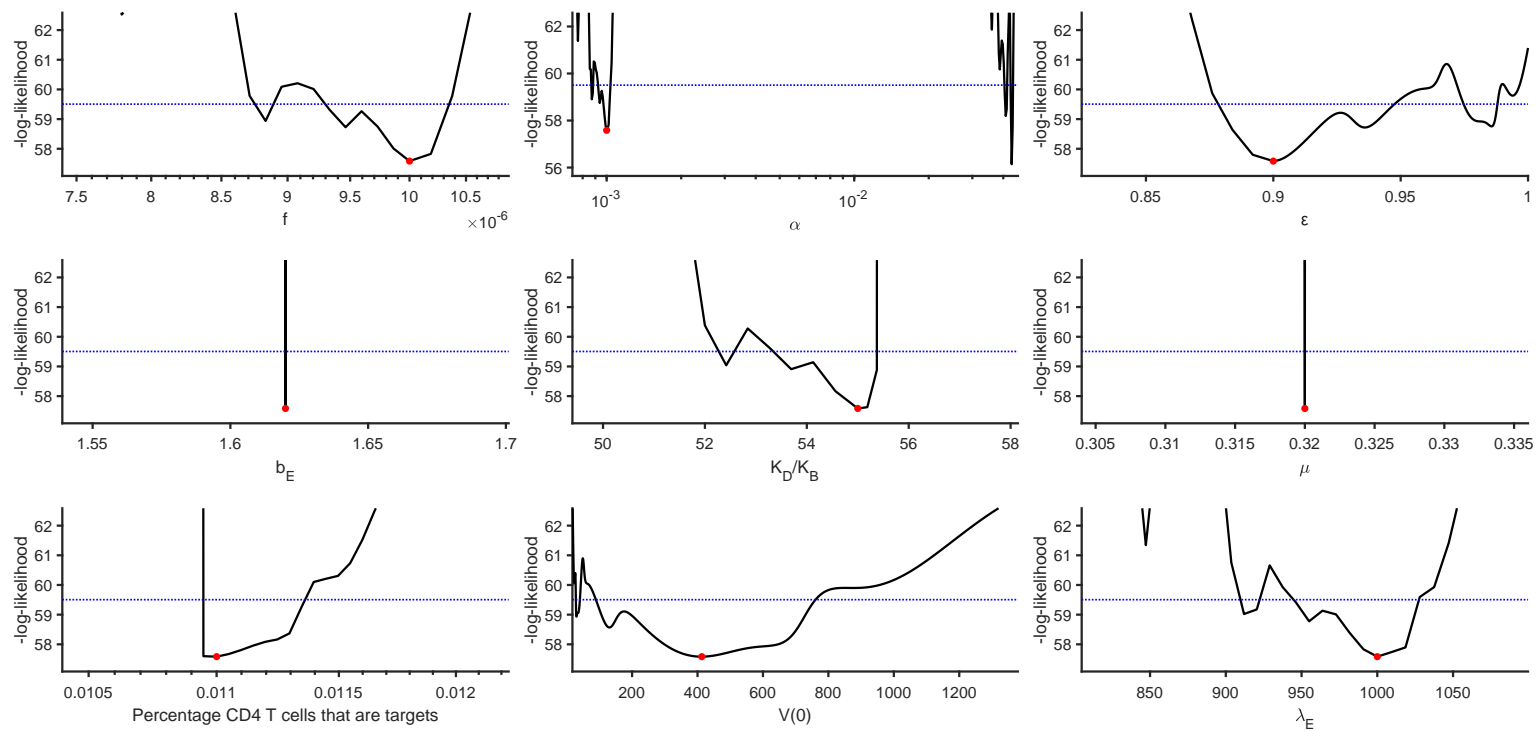

RSd14:Viral neutralization (SS)

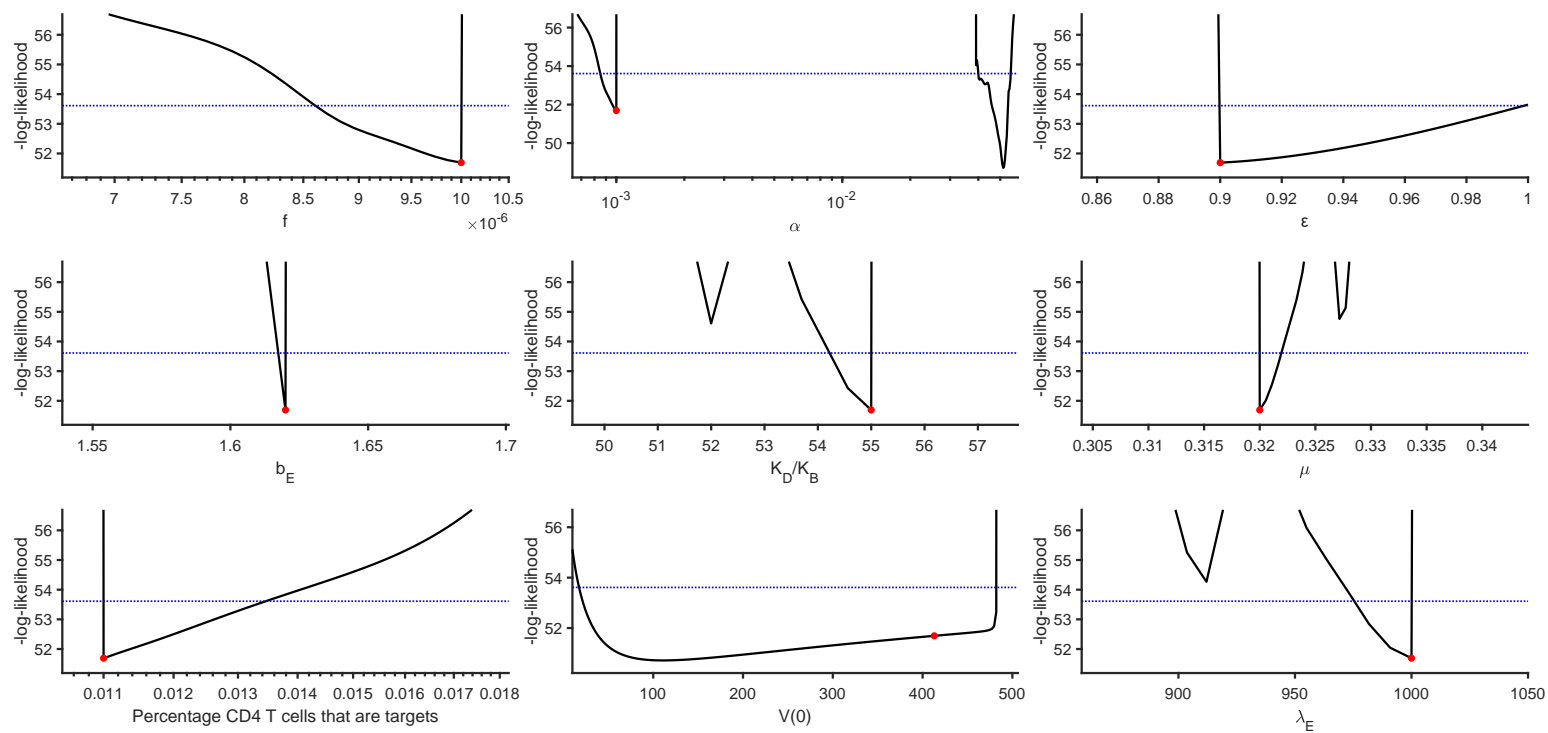

ROv14:Viral neutralization (SS)

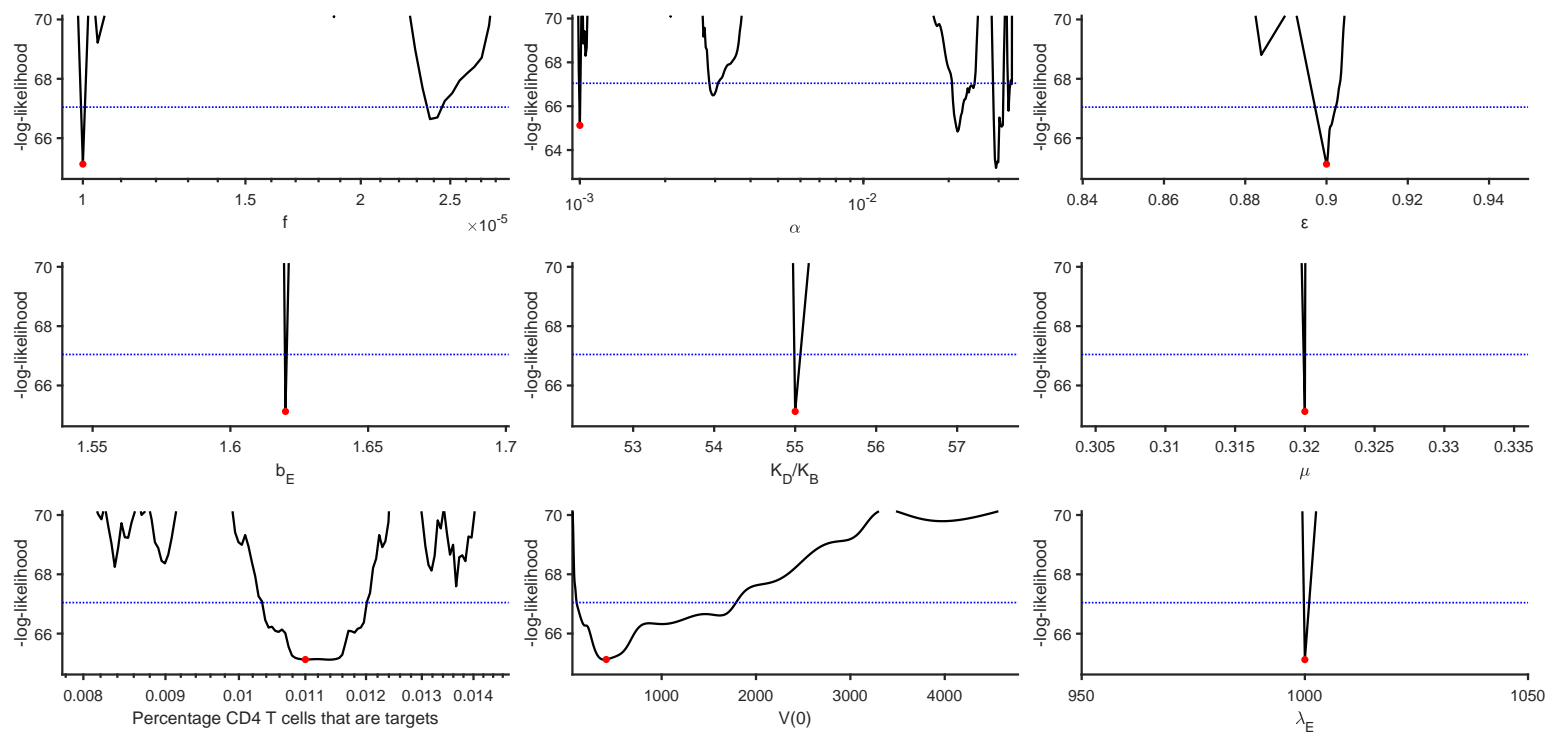



### 6.3 Antigen presenting cell effector cell source model

ROq14:Viral neutralization (APCS)

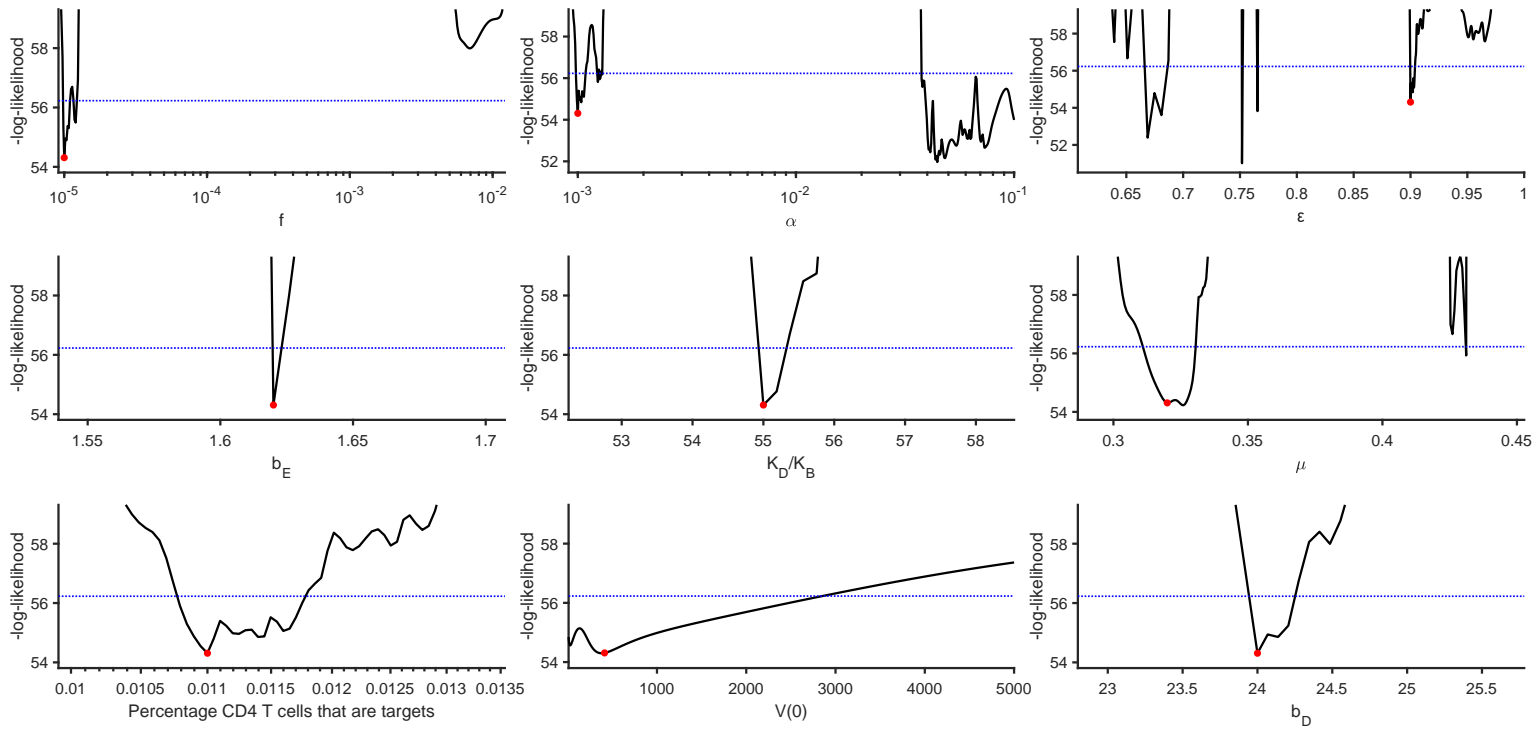

RDa15:Viral neutralization (APCS)

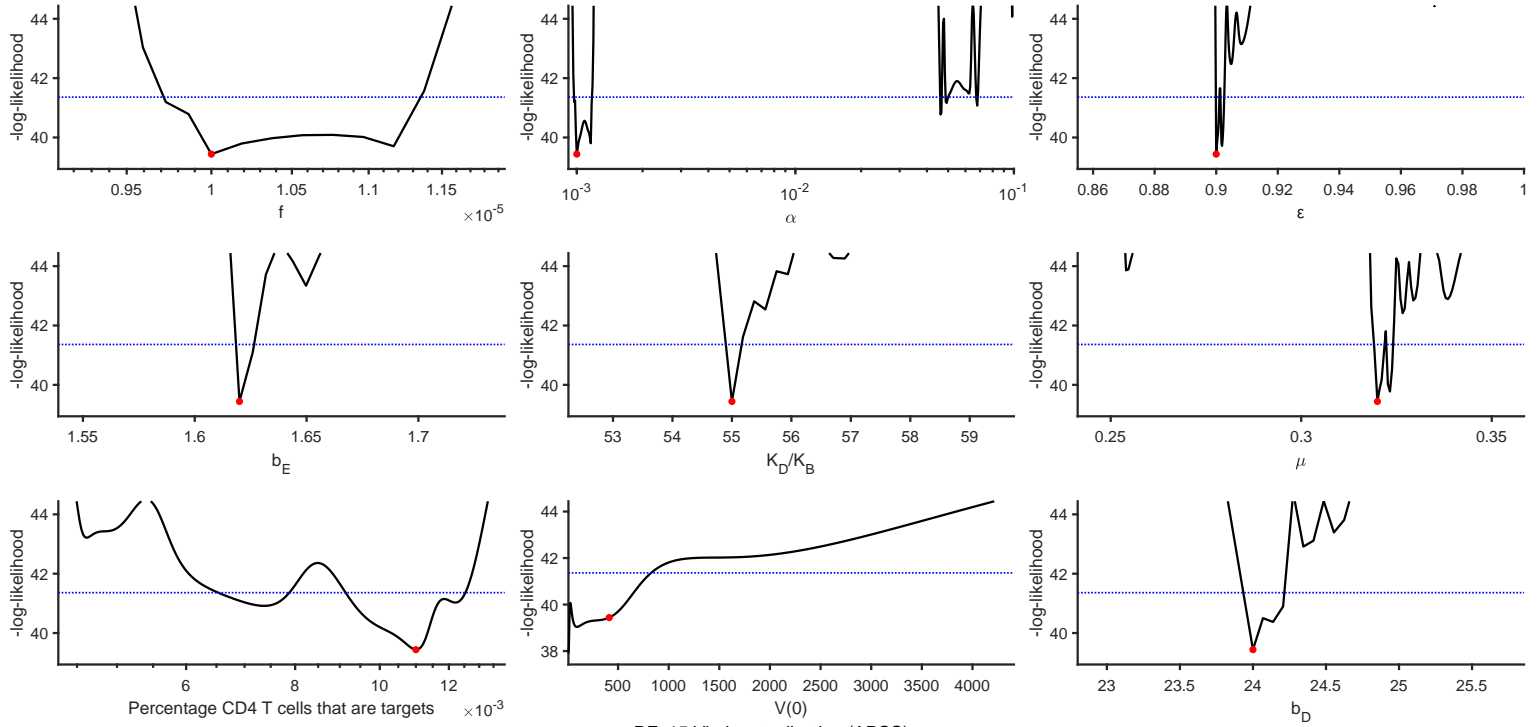

RFa15:Viral neutralization (APCS)

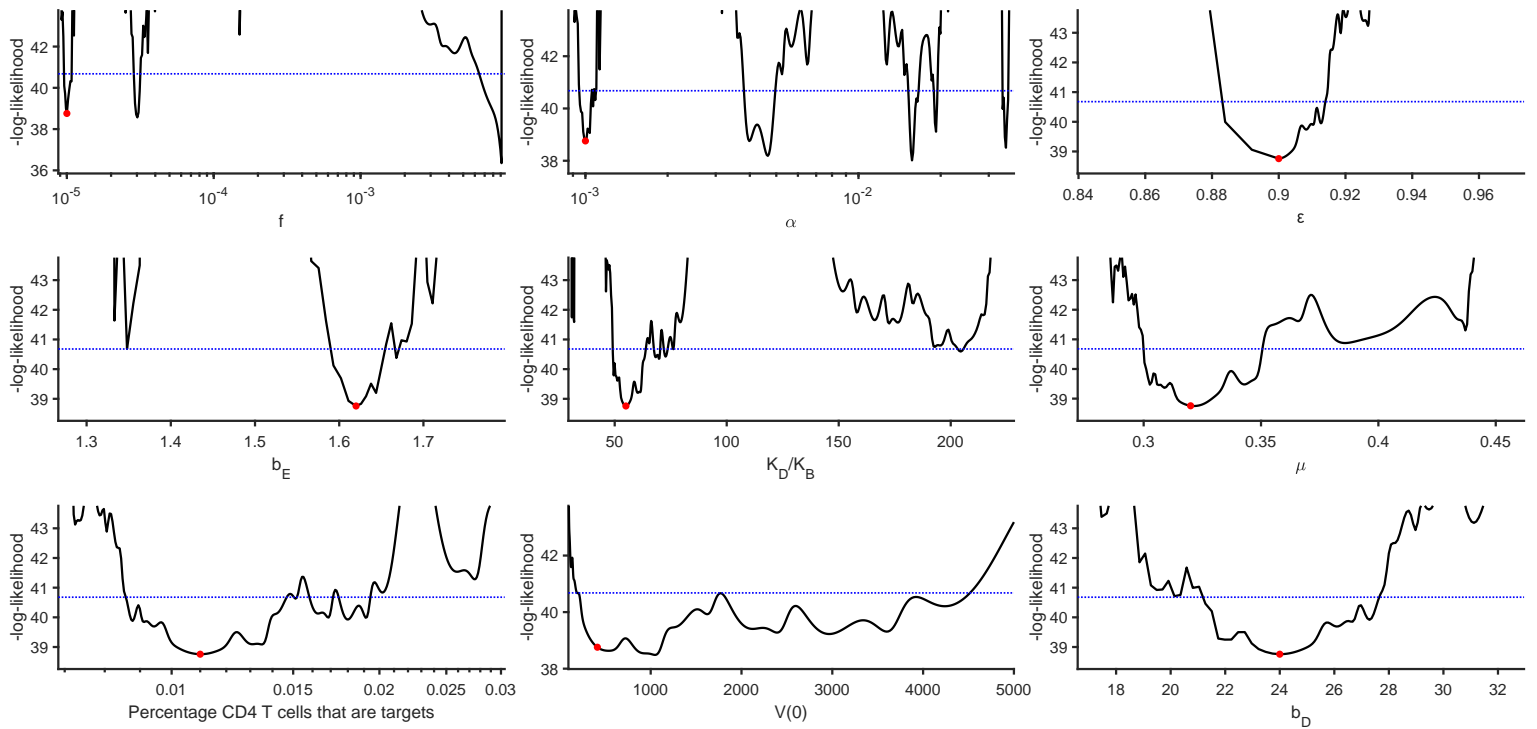

RLn12:Viral neutralization (APCS)

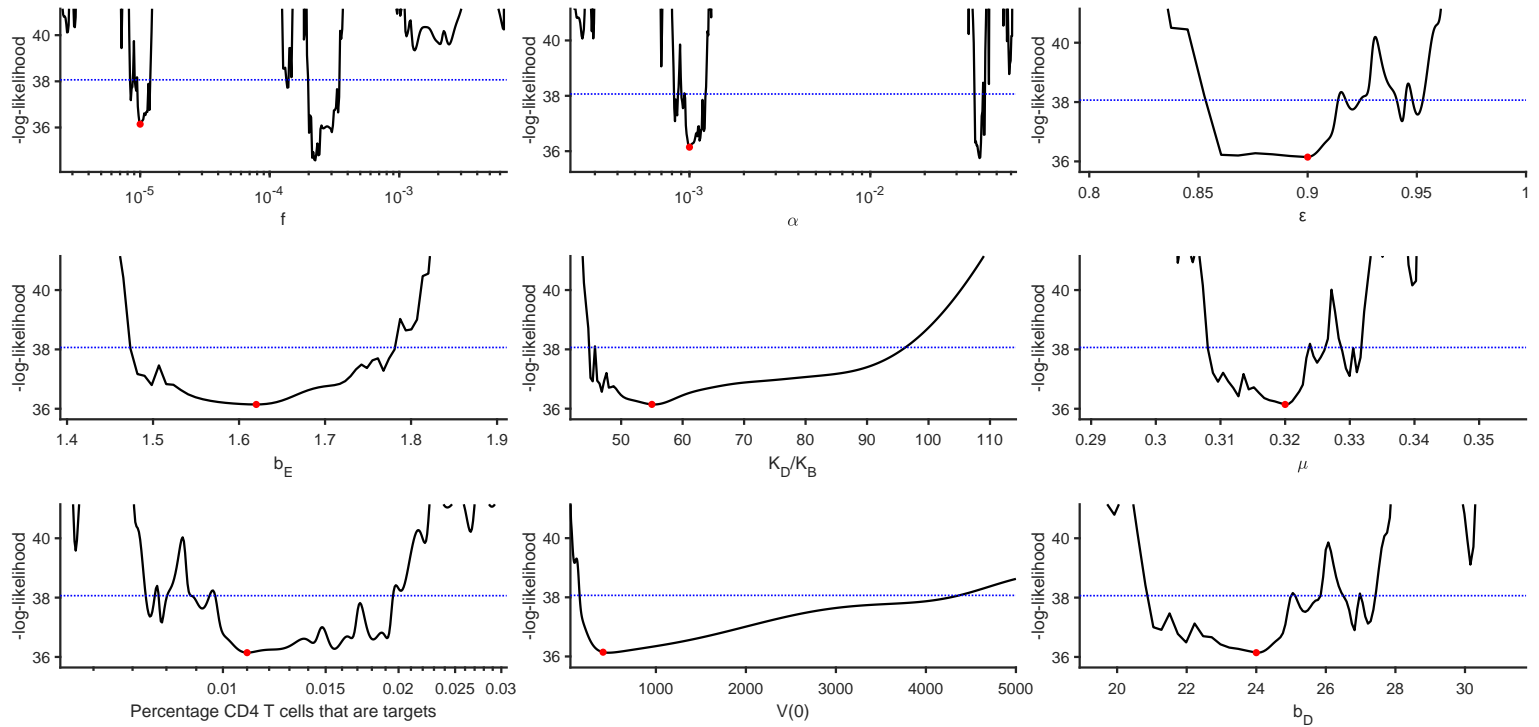

Rld14:Viral neutralization (APCS)

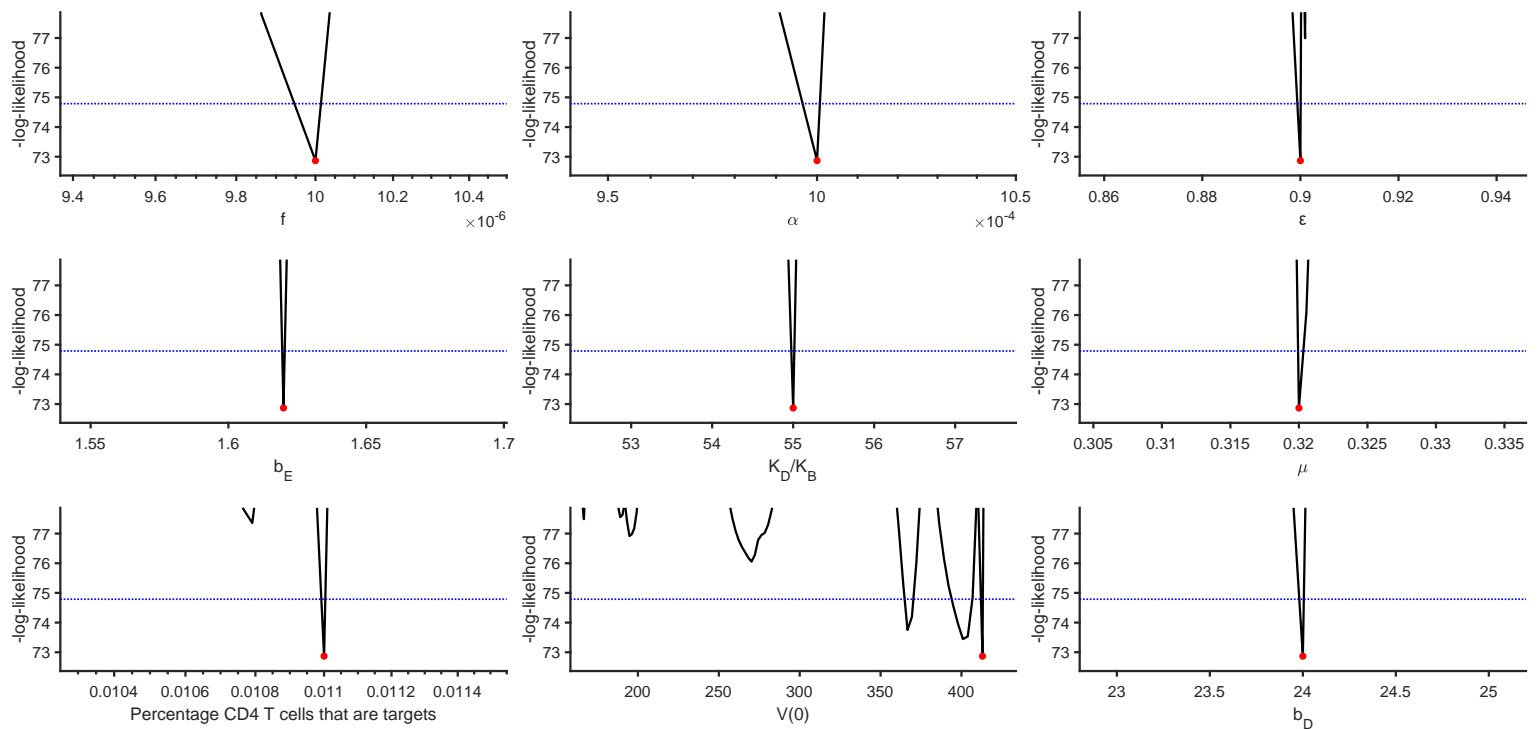

ROo13:Viral neutralization (APCS)

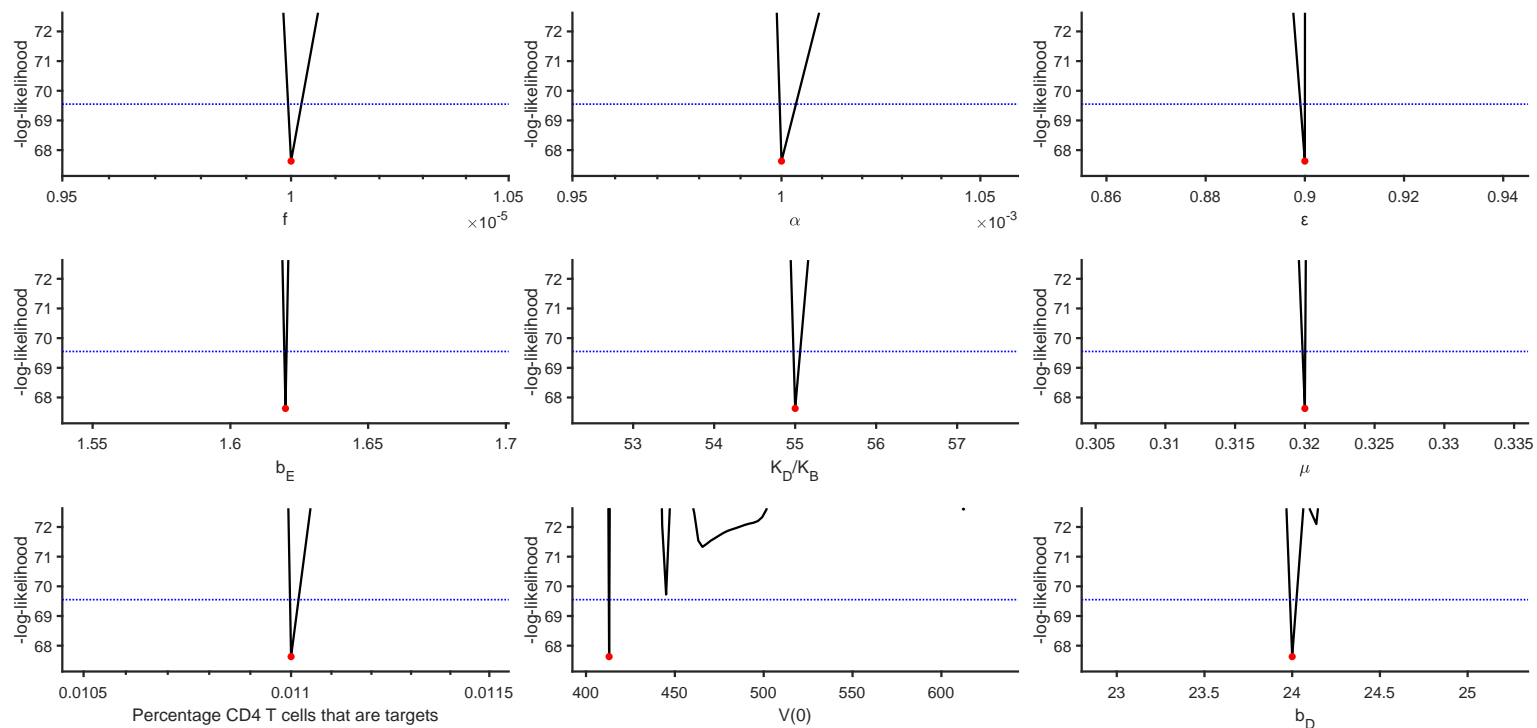

RSd14:Viral neutralization (APCS)

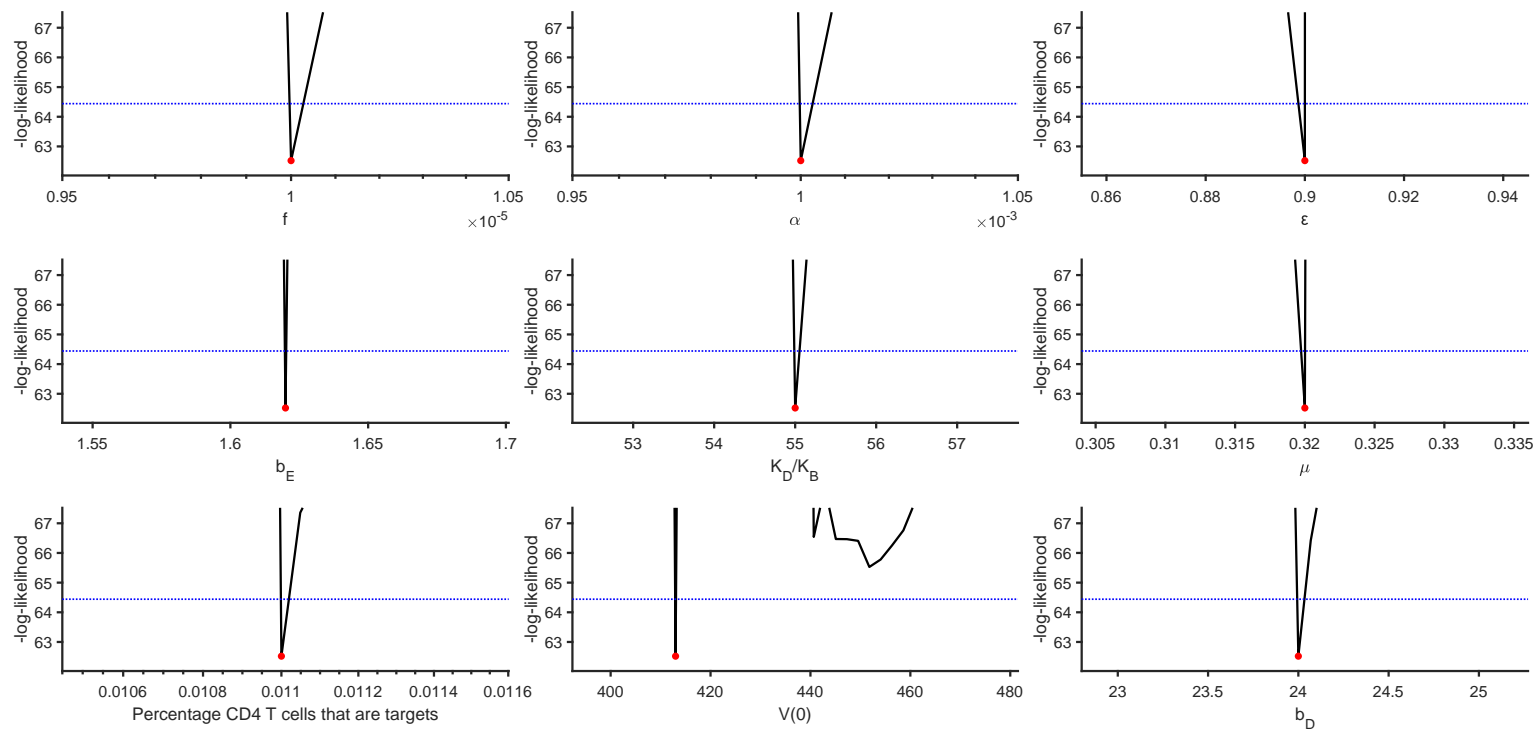

ROV14:Viral neutralization (APCS)

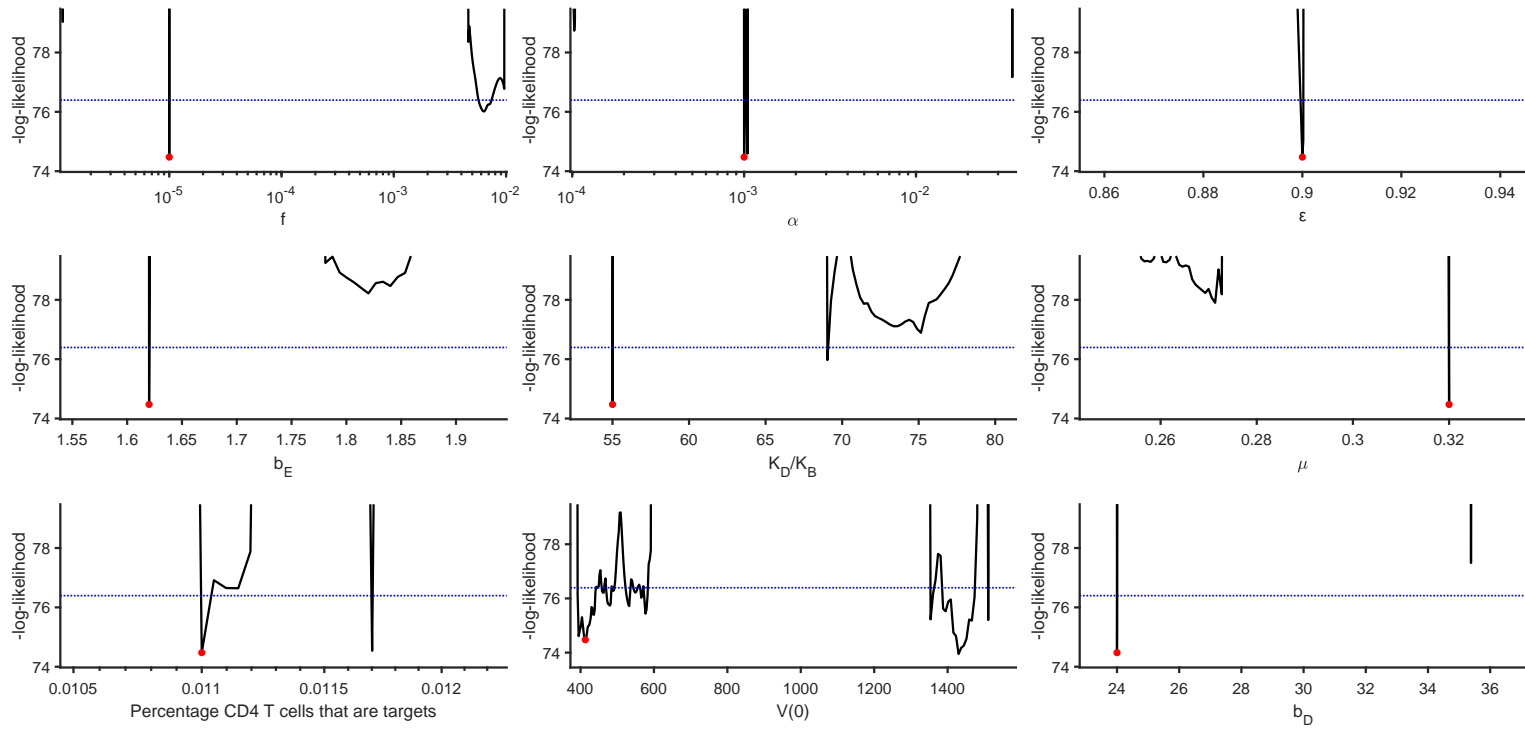

# 7 Likelihood profiles: Protection

## 7.1 Baseline effector cell source model

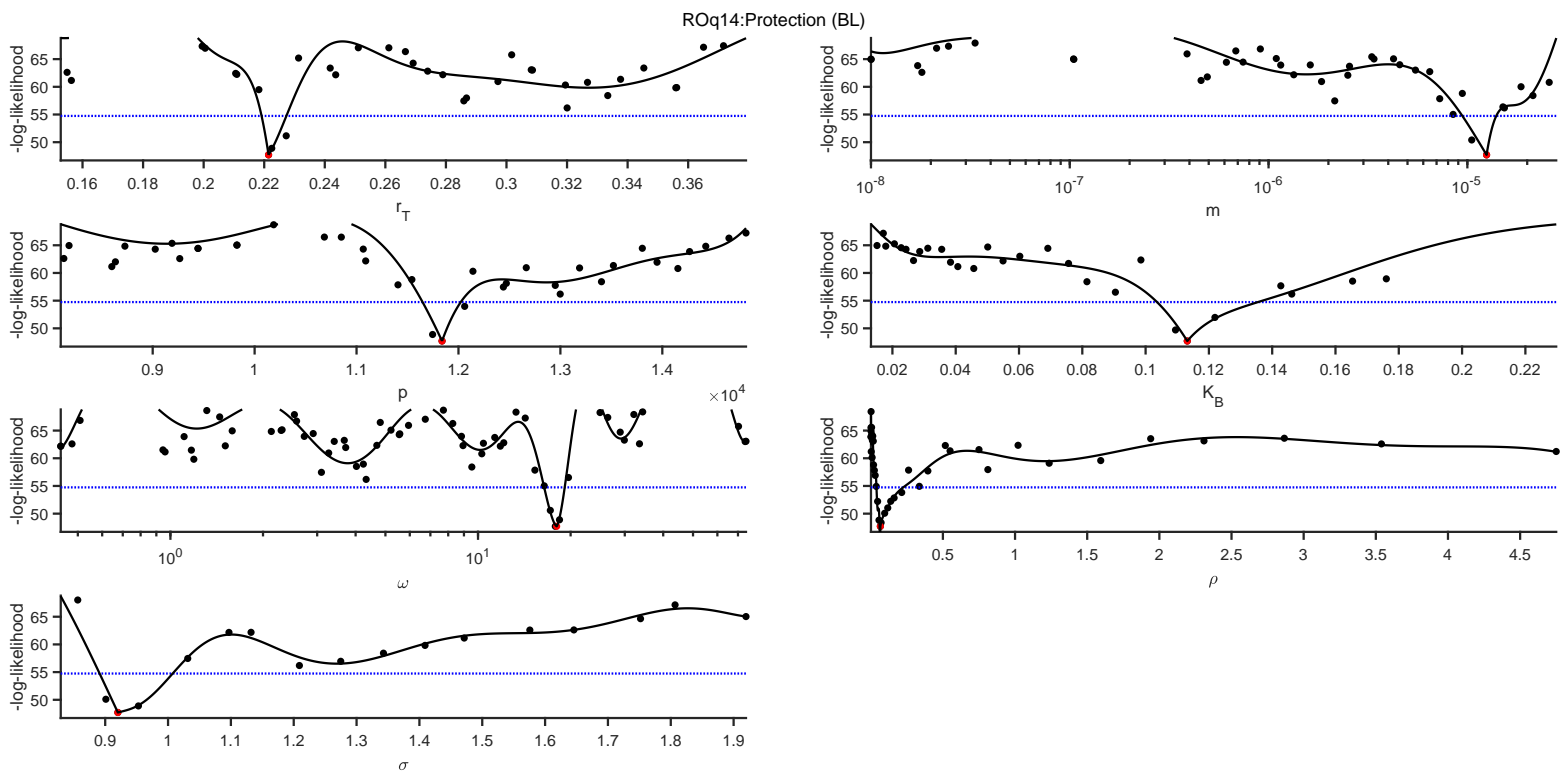

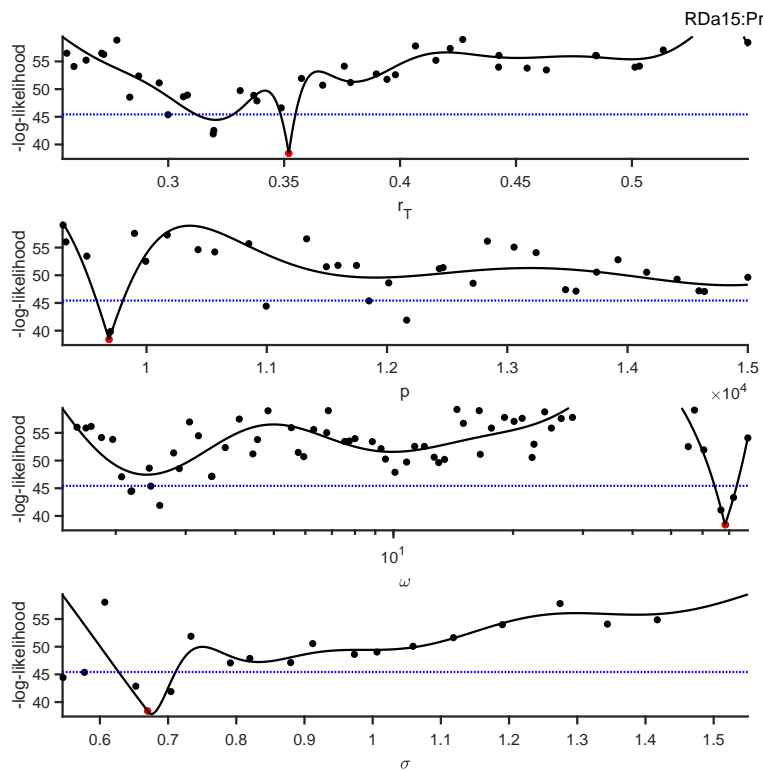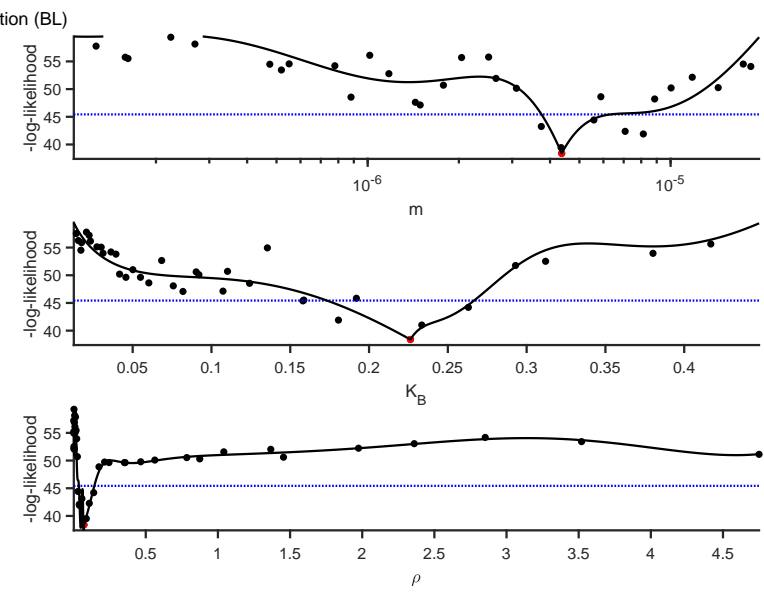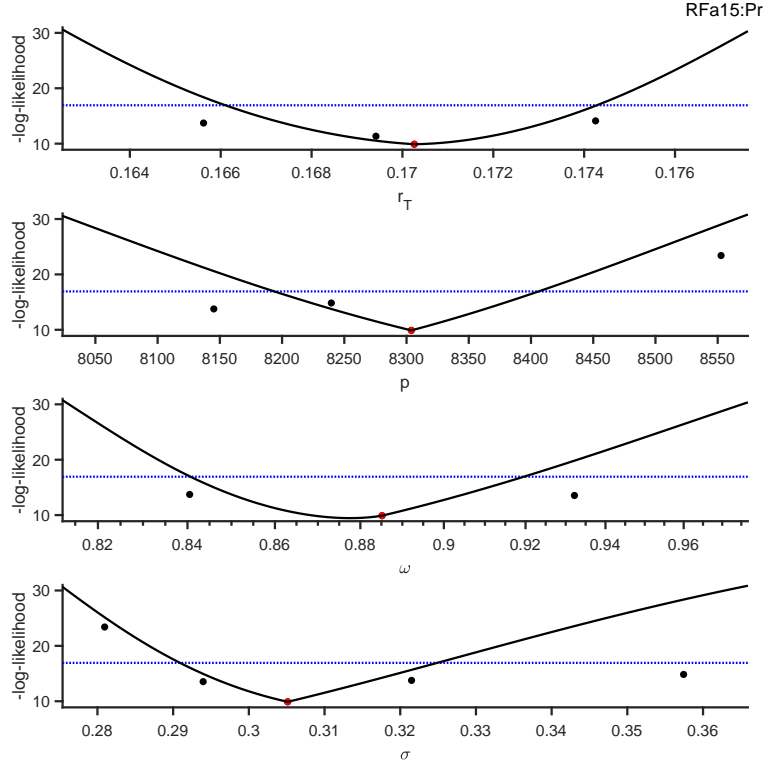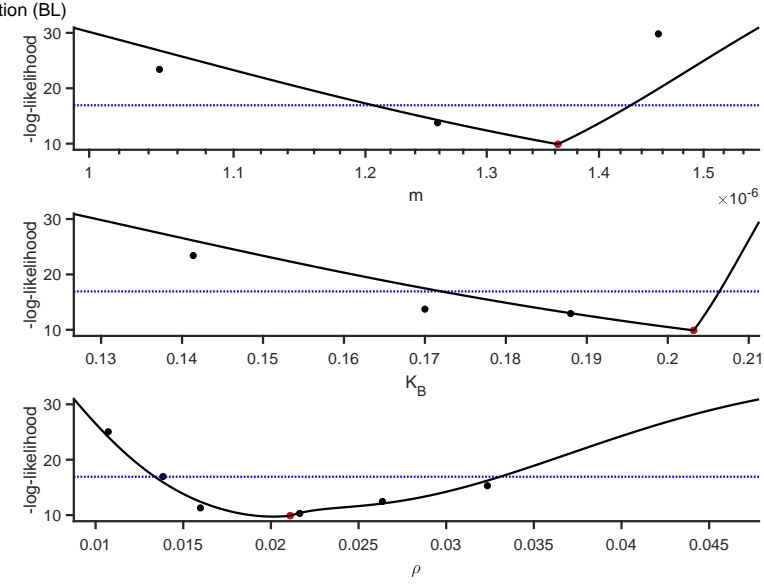

RLn12:Protection (BL)

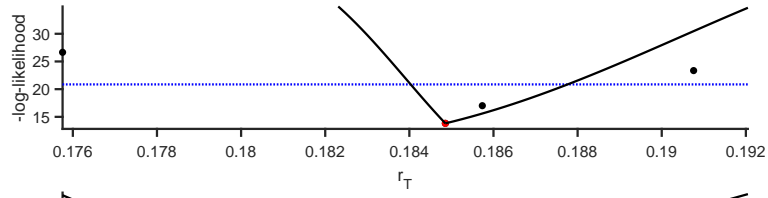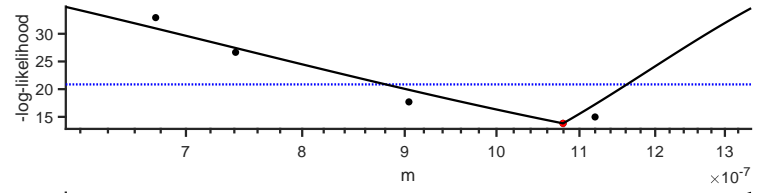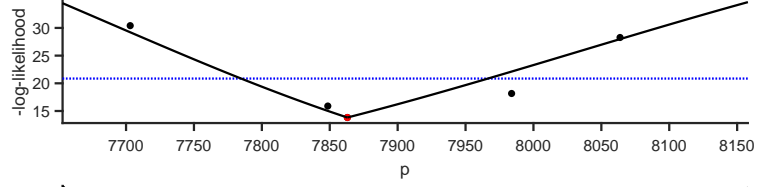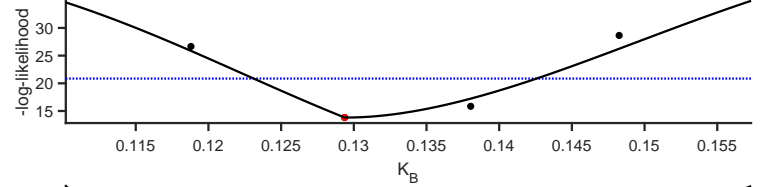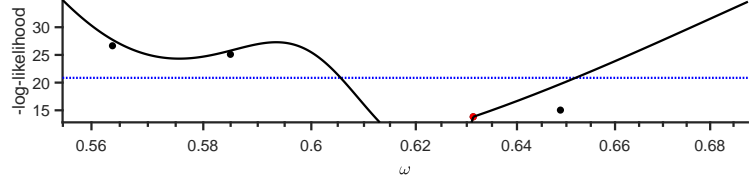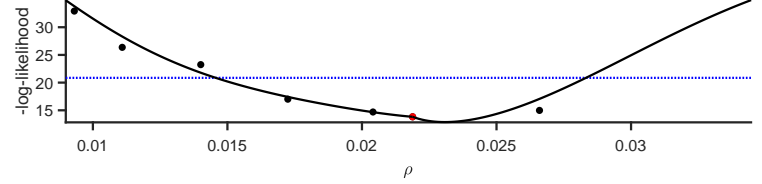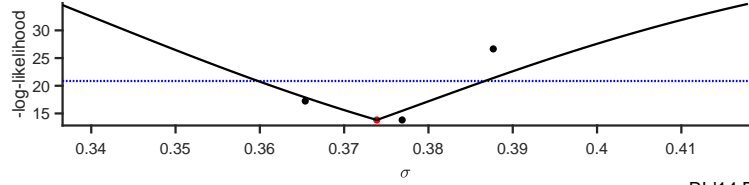

RId14:Protection (BL)

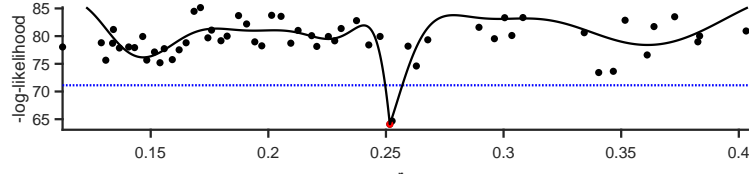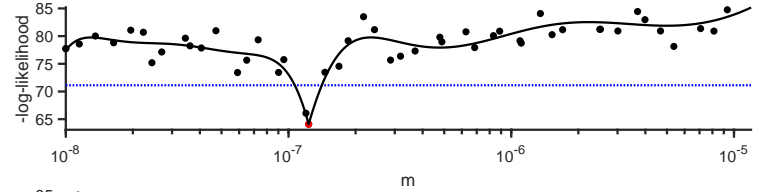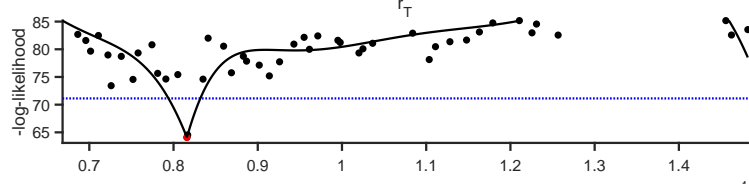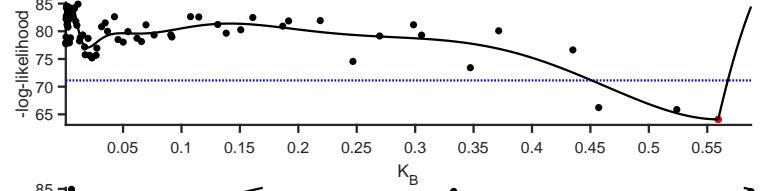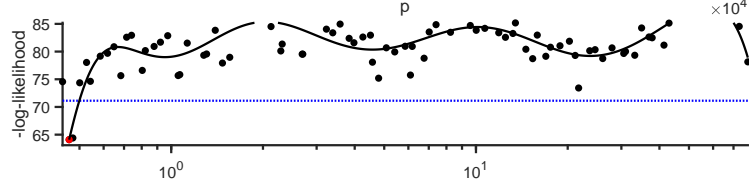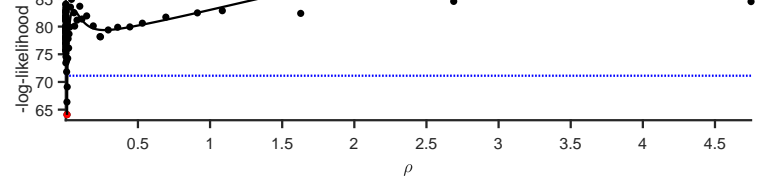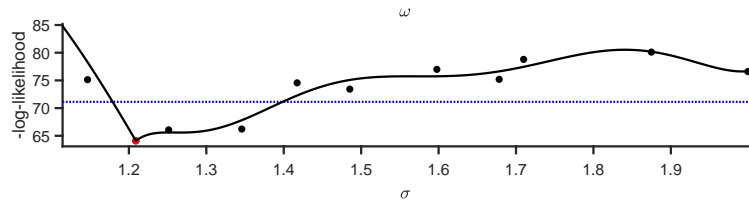



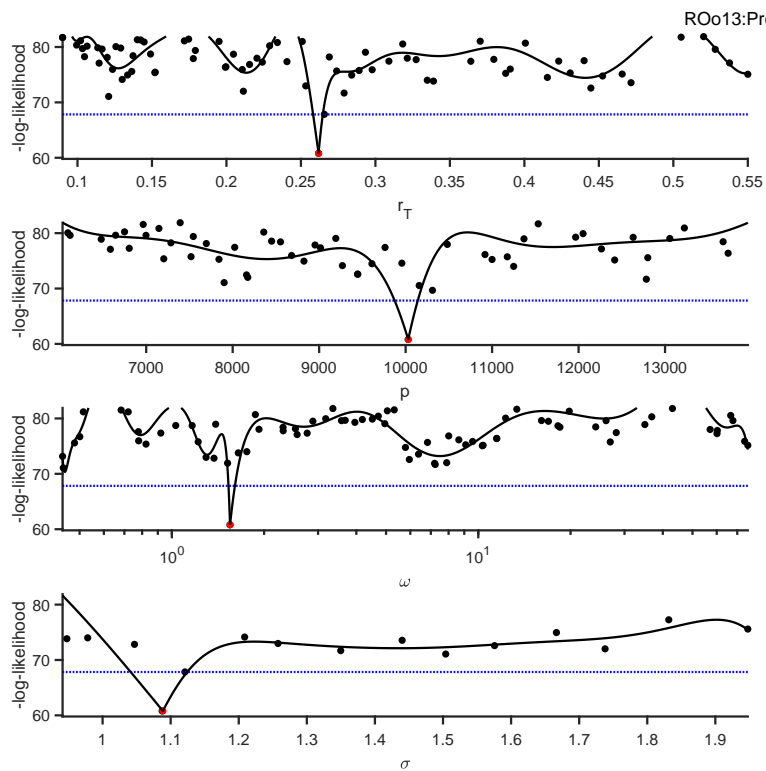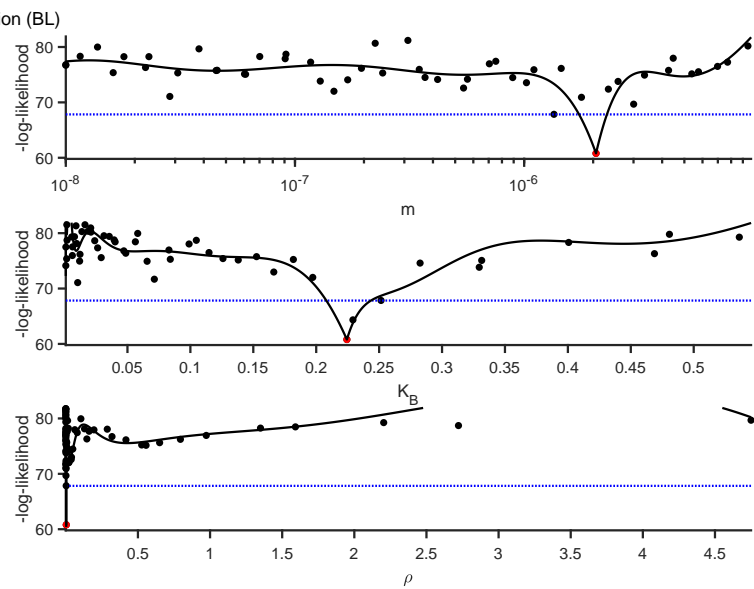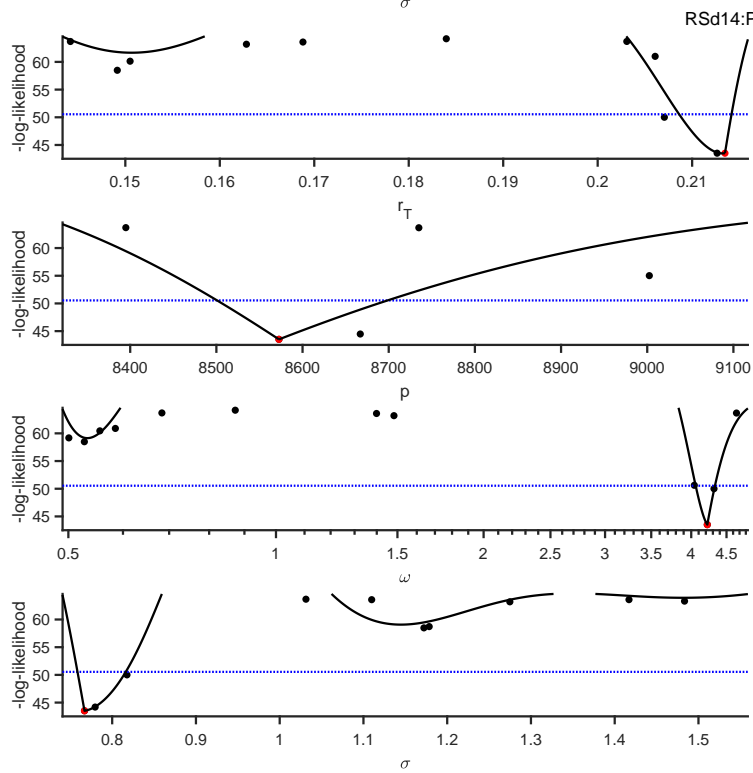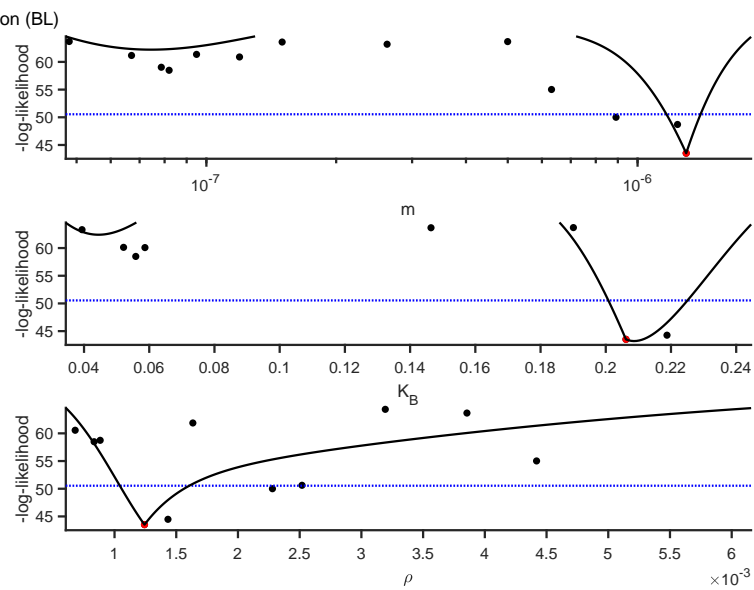

ROv14:Protection (BL)

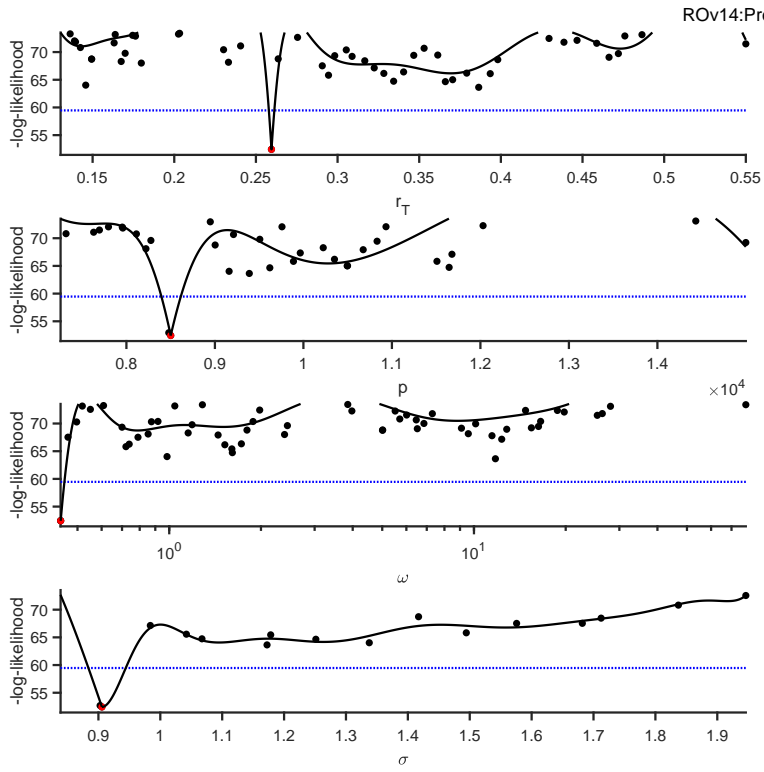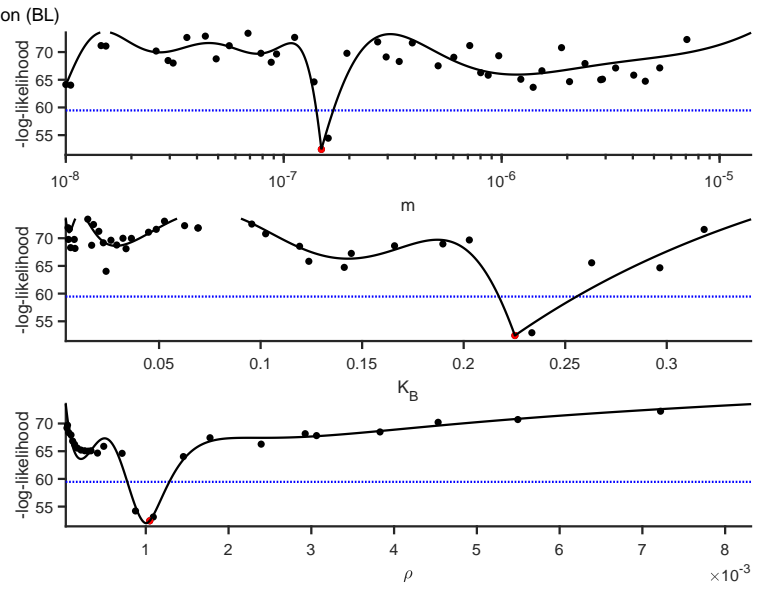

## 7.2 Saturated effector cell source model

ROq14:Protection (SS)

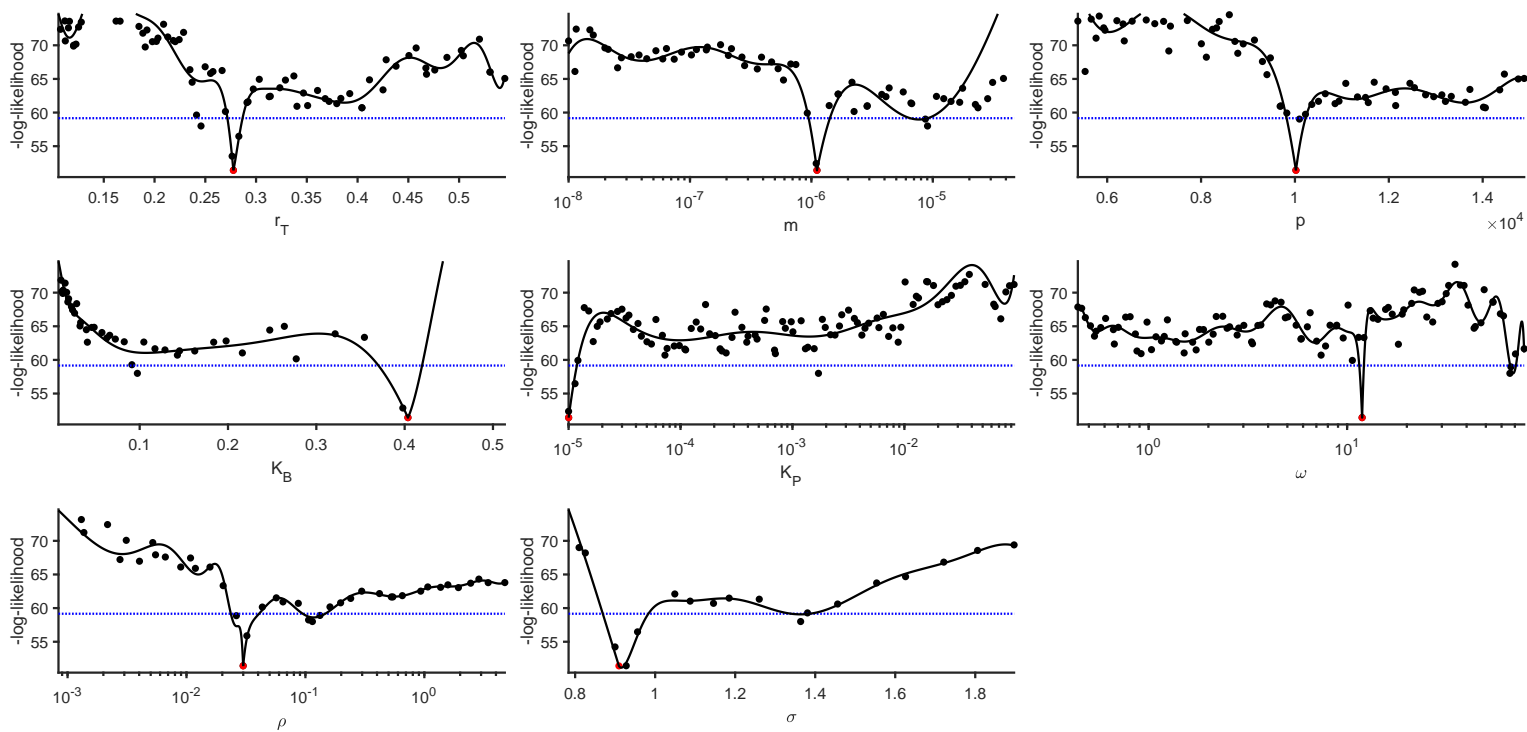

RDa15:Protection (SS)

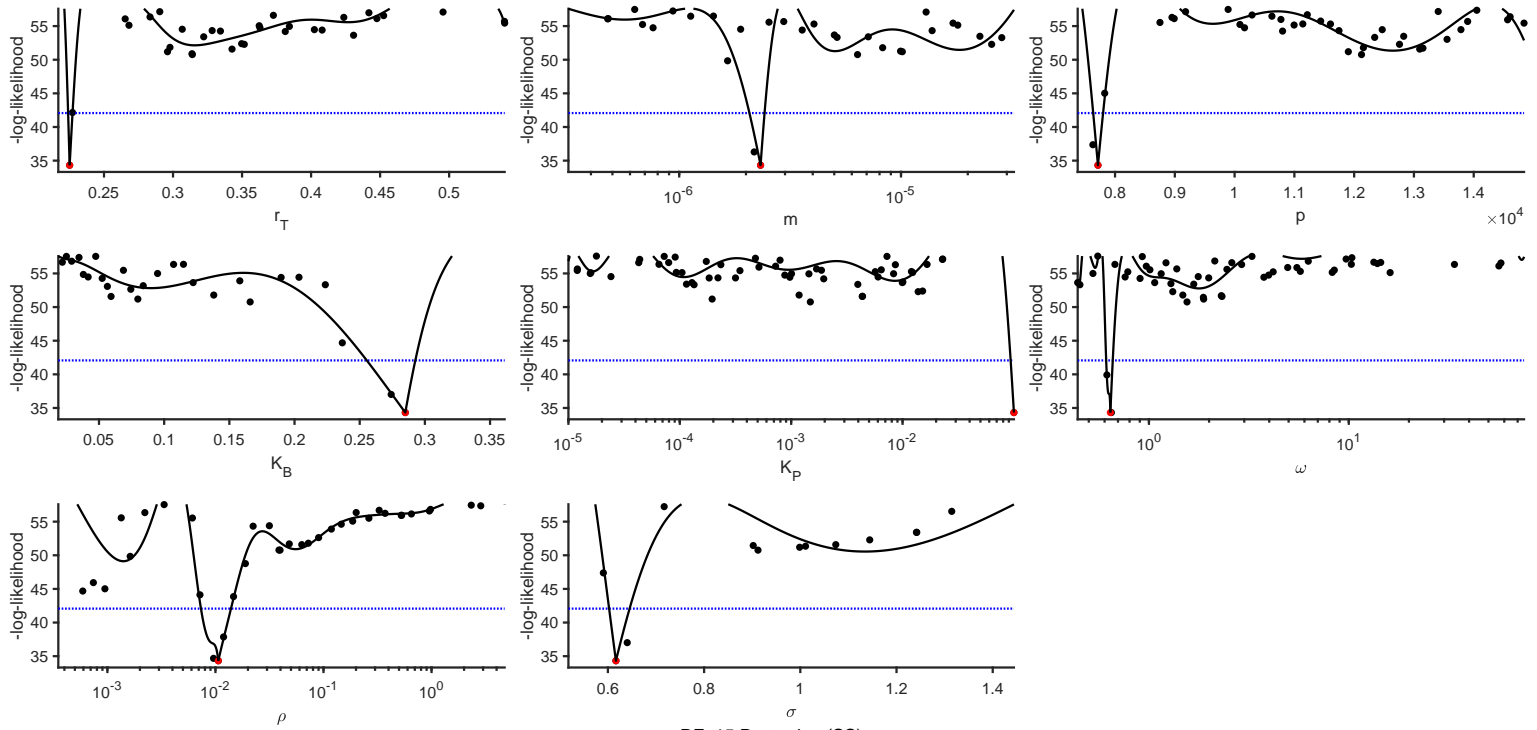

RFa15:Protection (SS)

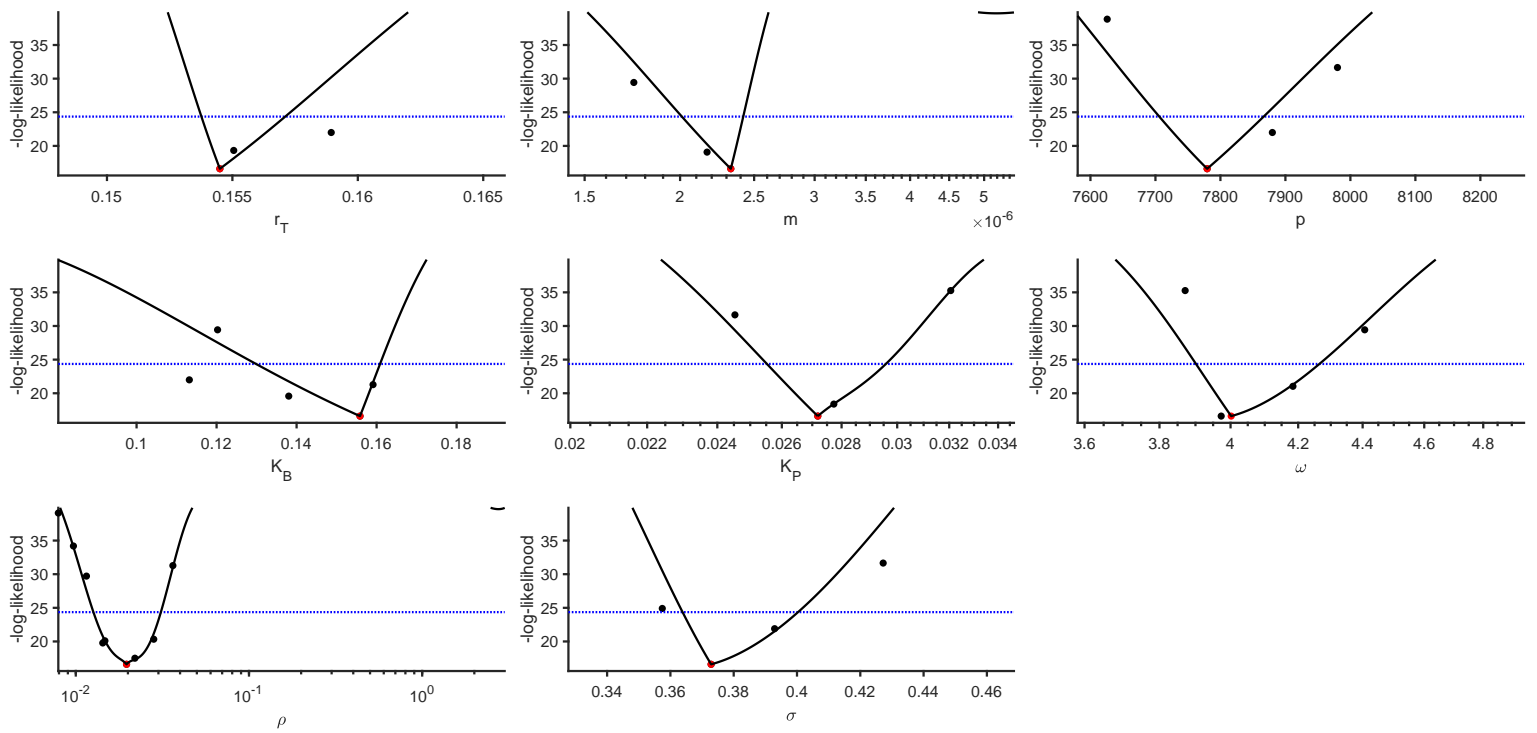

RLn12:Protection (SS)

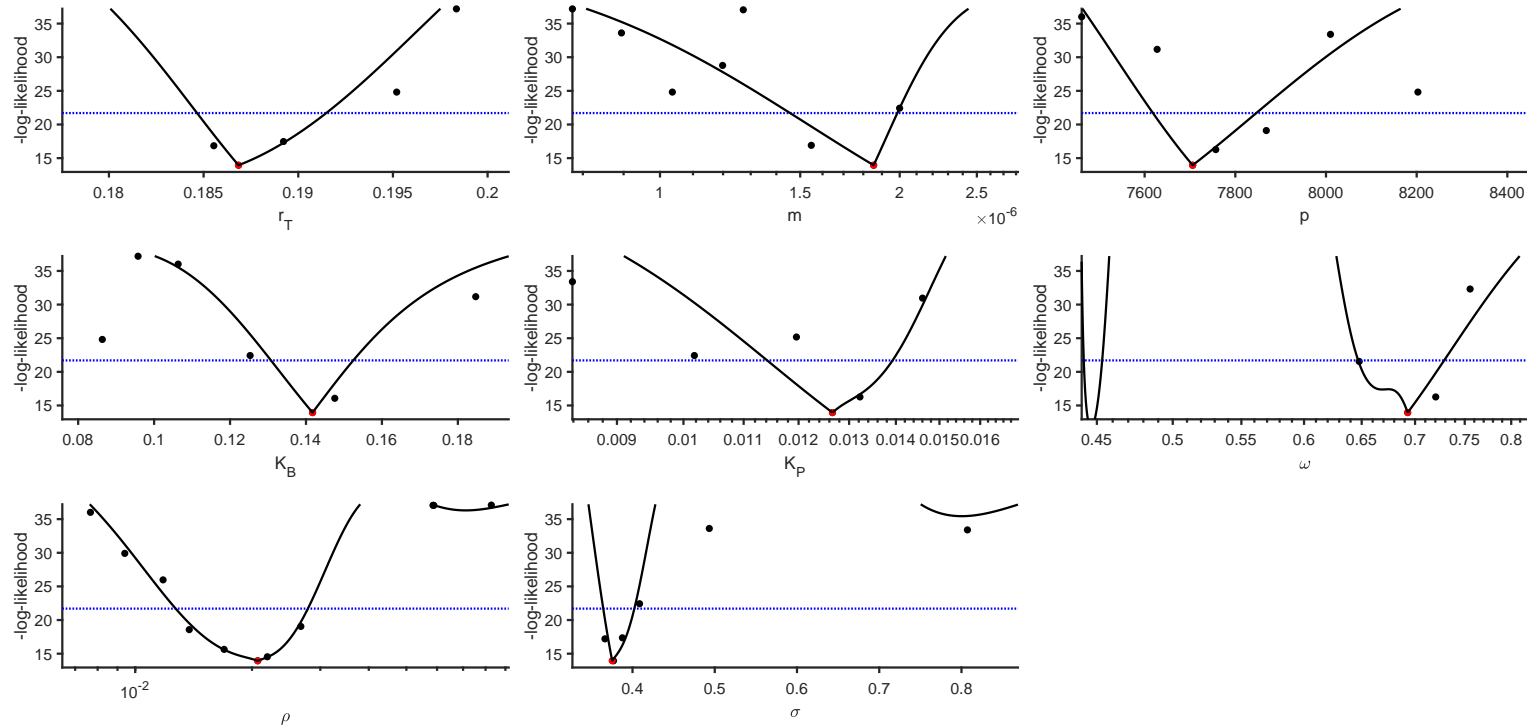

Rld14:Protection (SS)

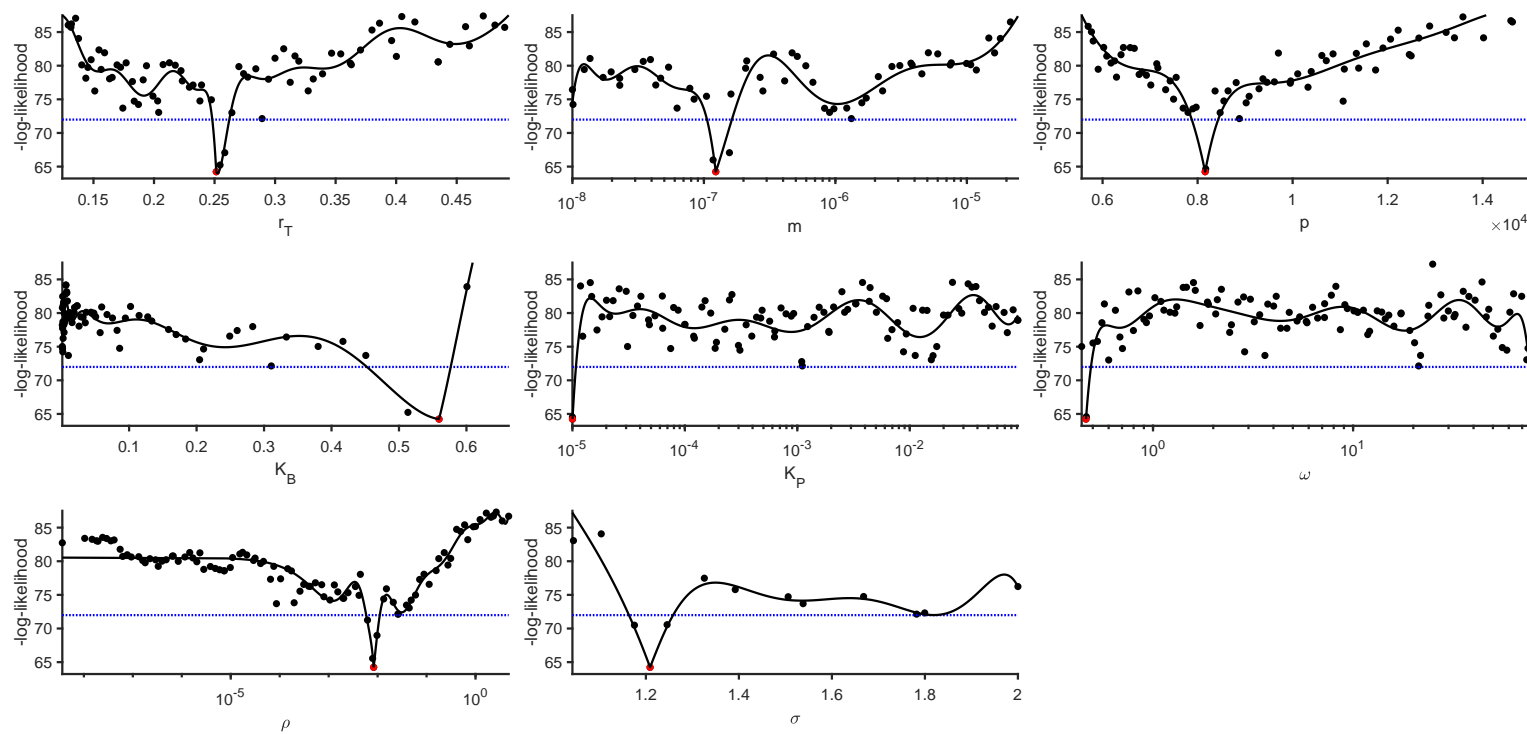

ROo13:Protection (SS)

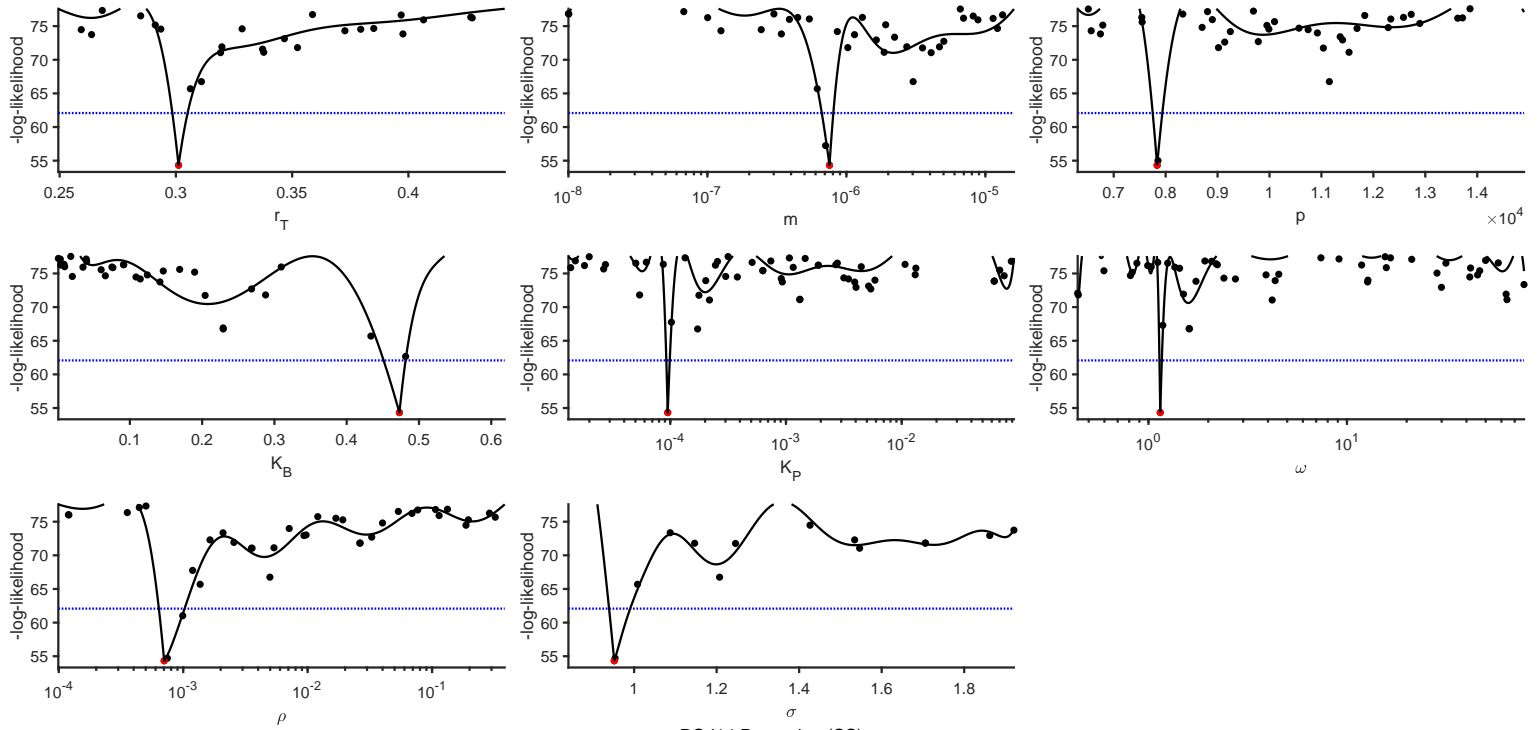

RSd14:Protection (SS)

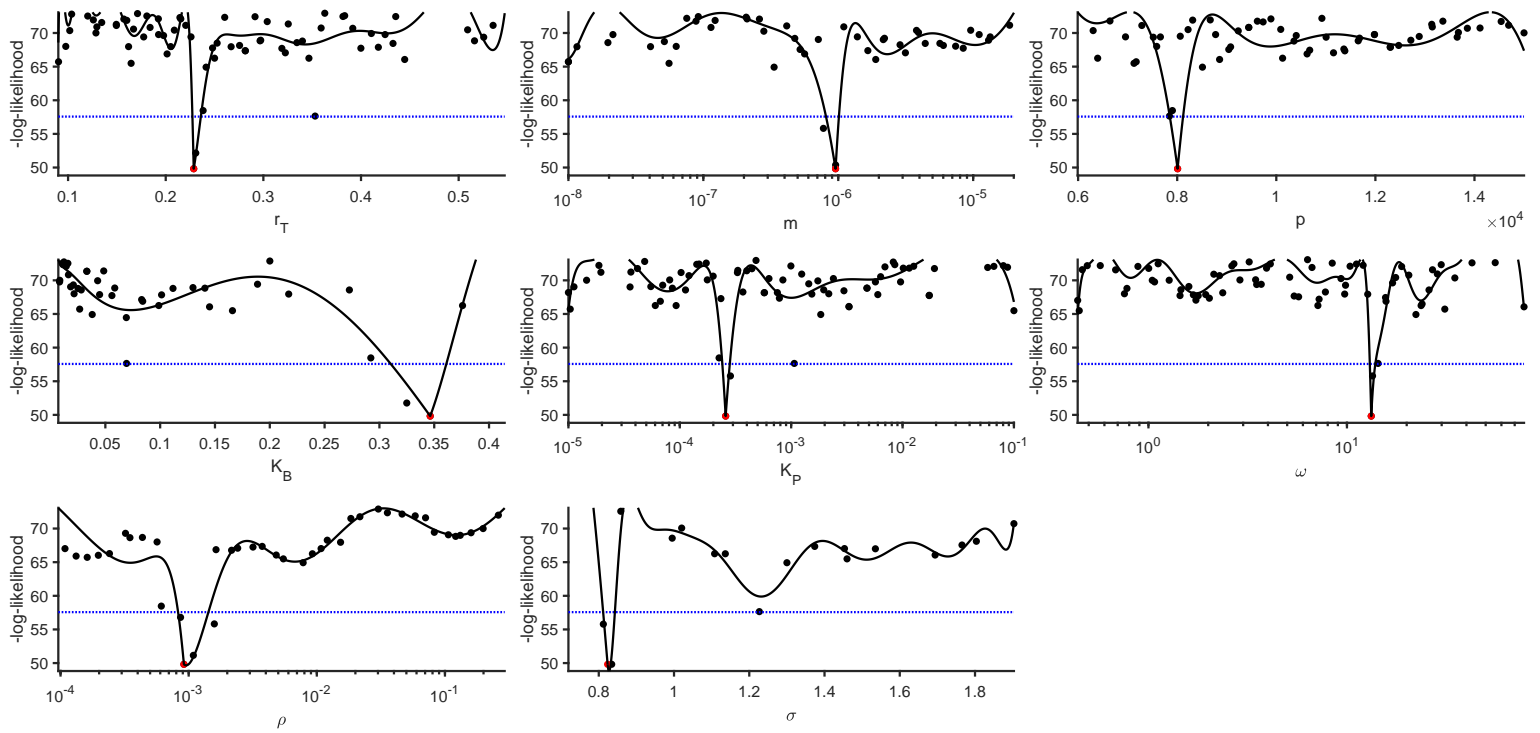

ROv14:Protection (SS)

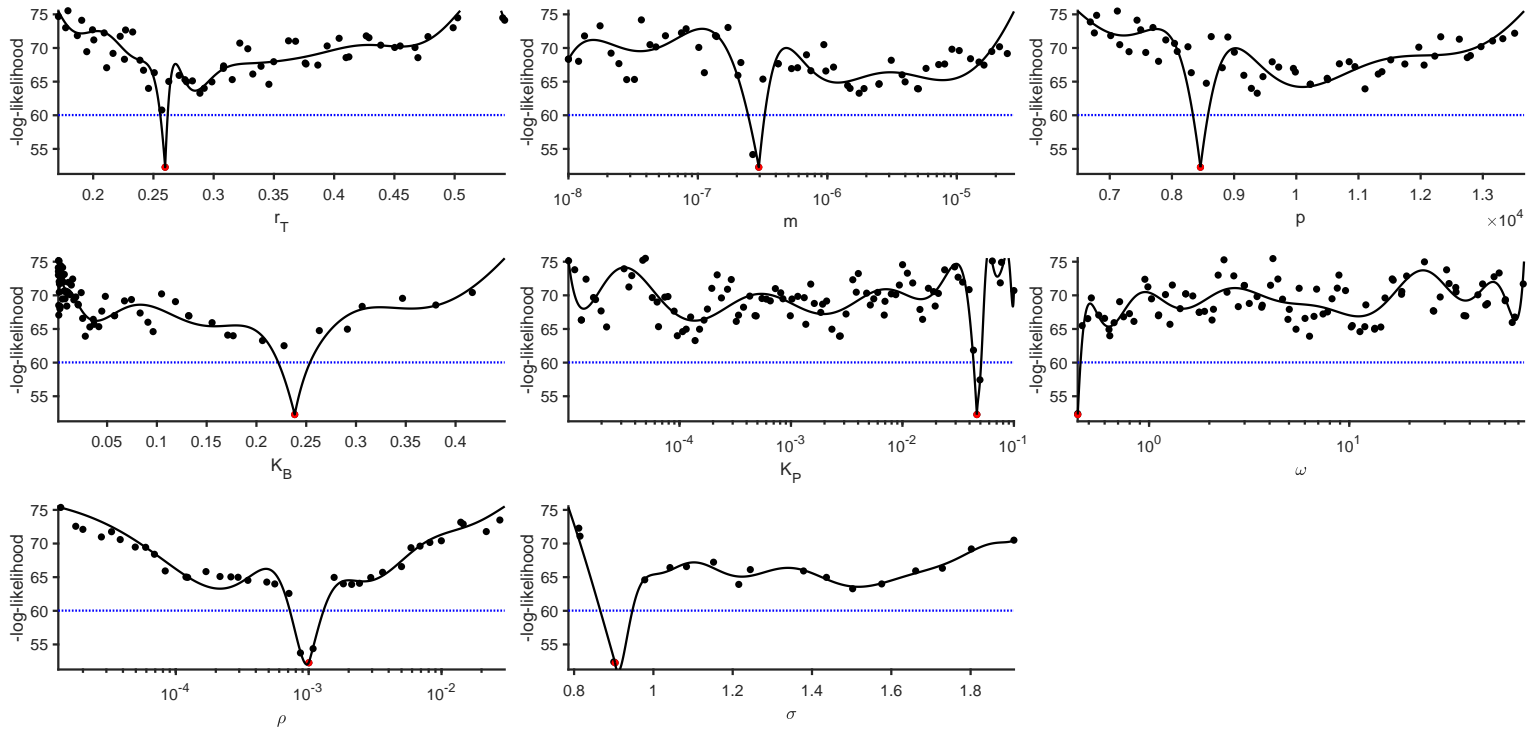

### 7.3 Antigen presenting cell effector cell source model

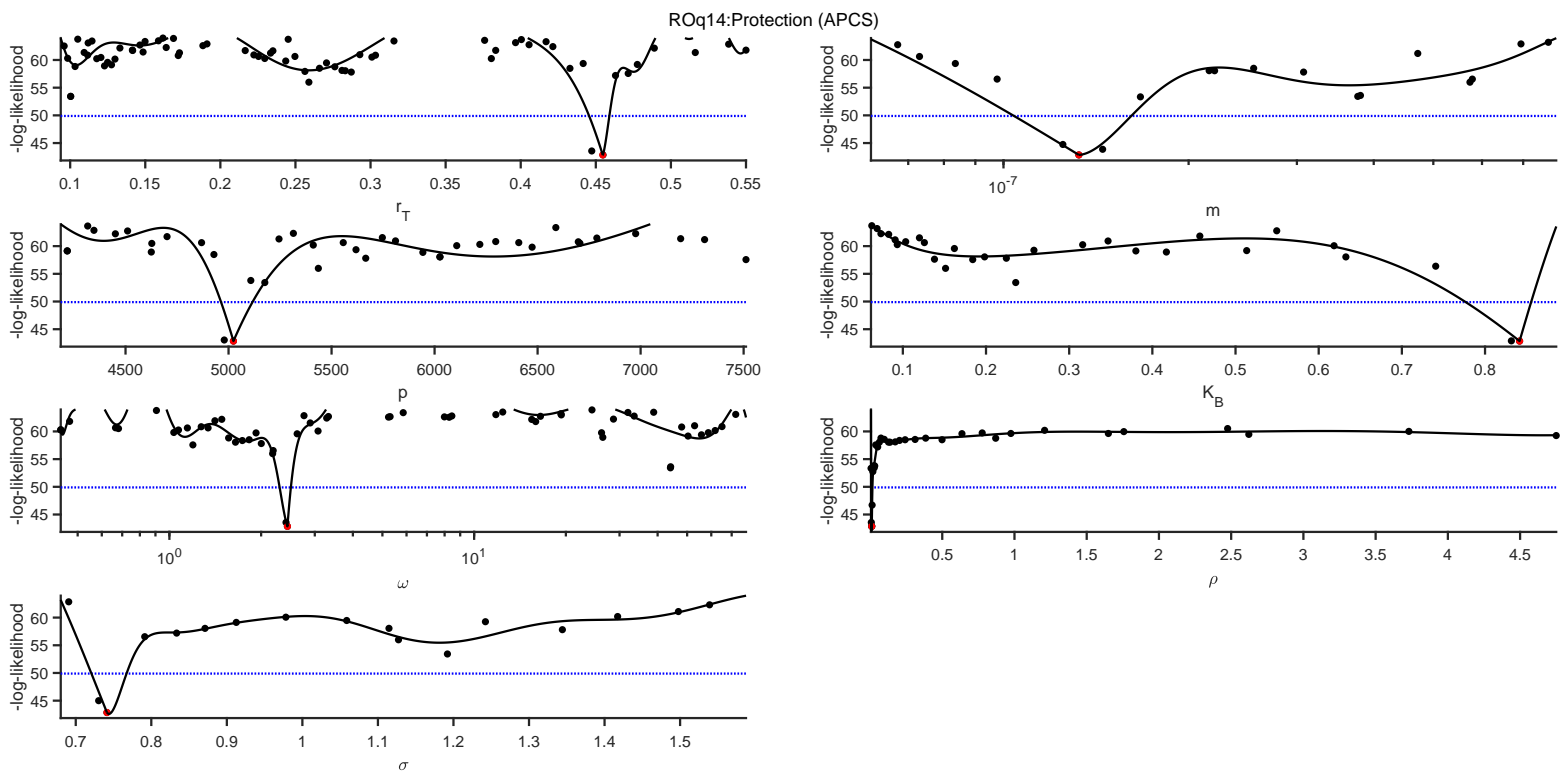



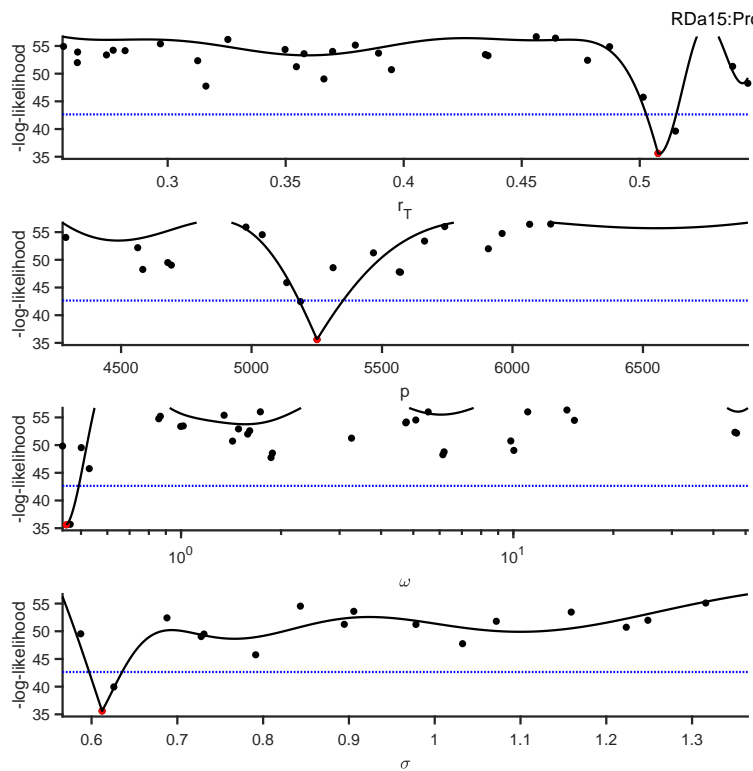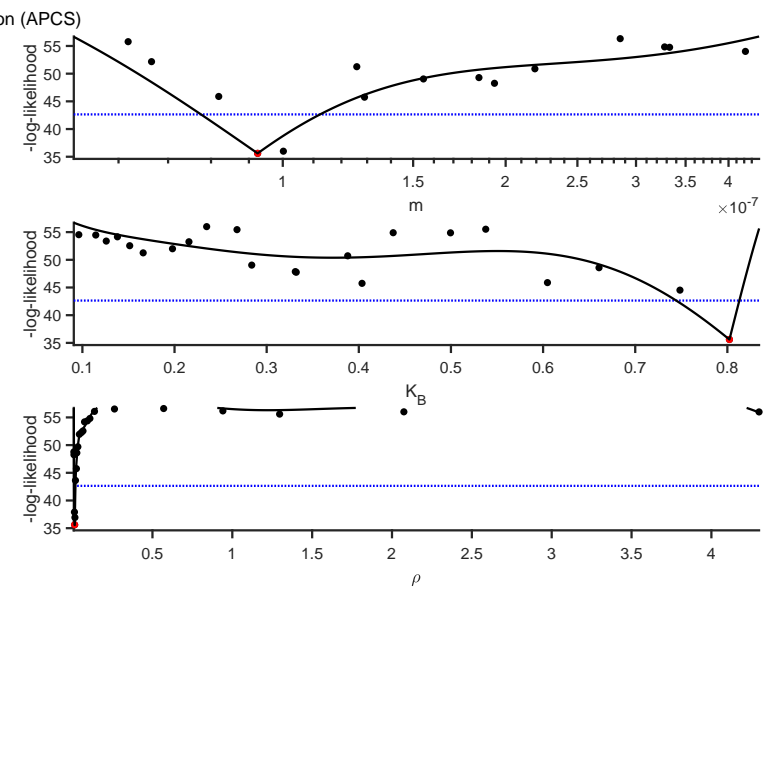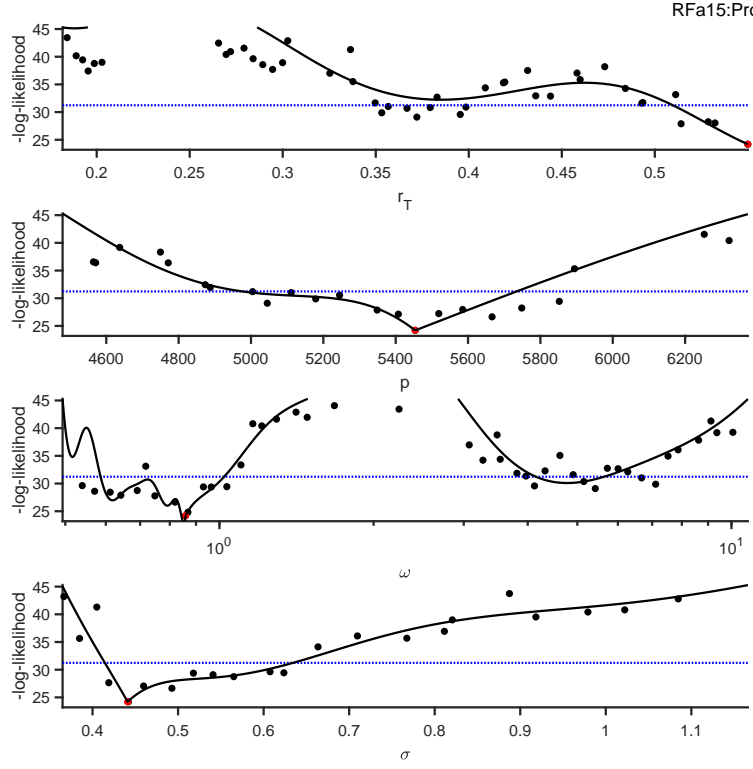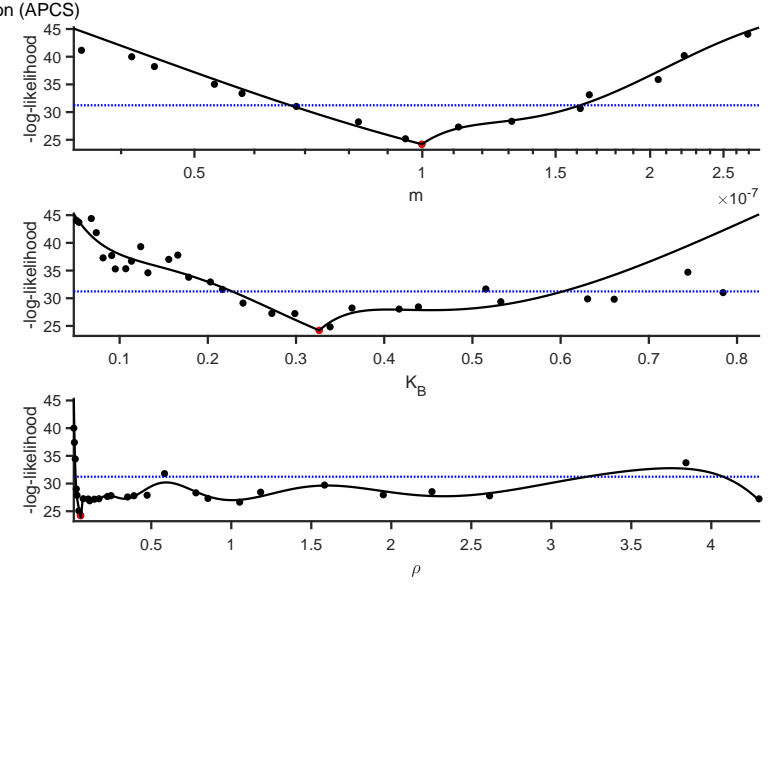

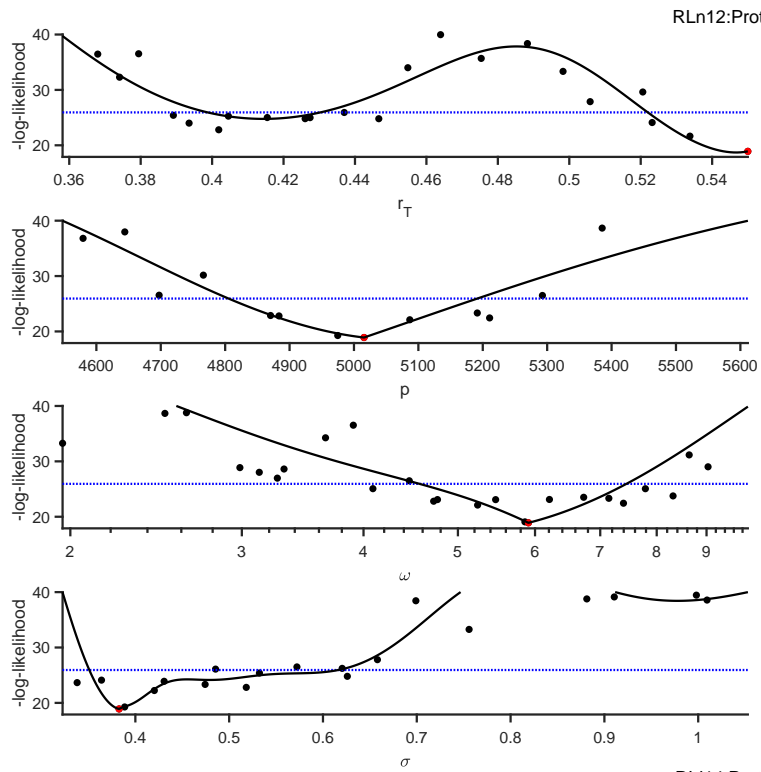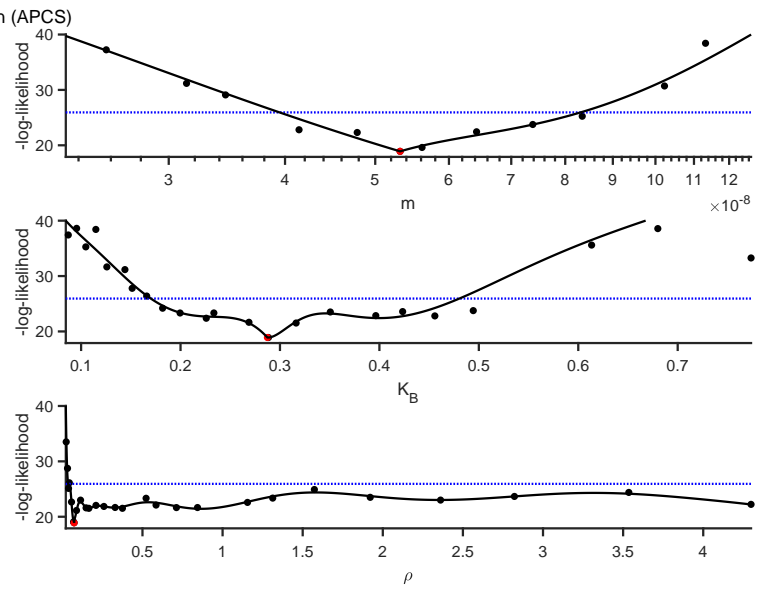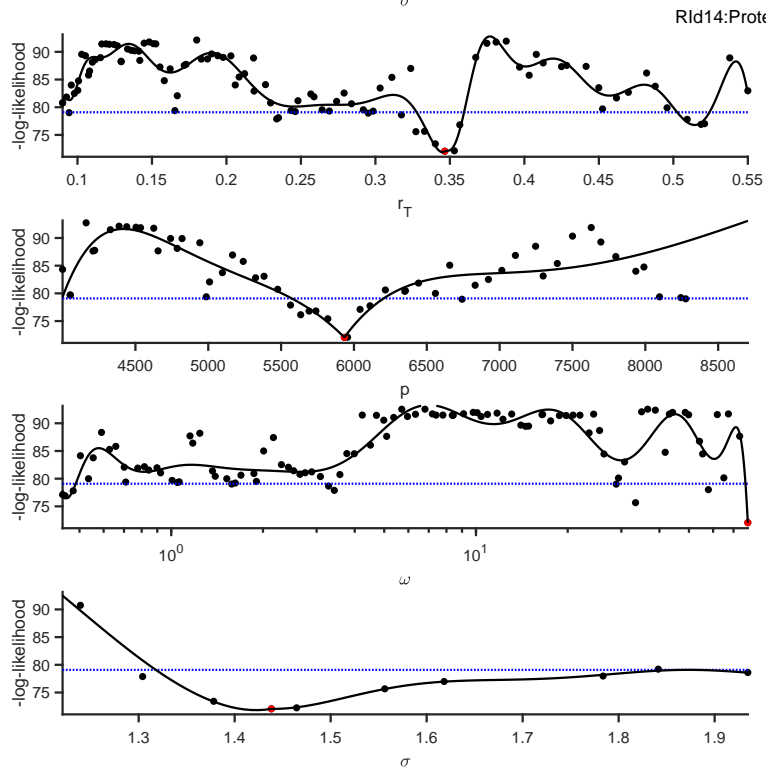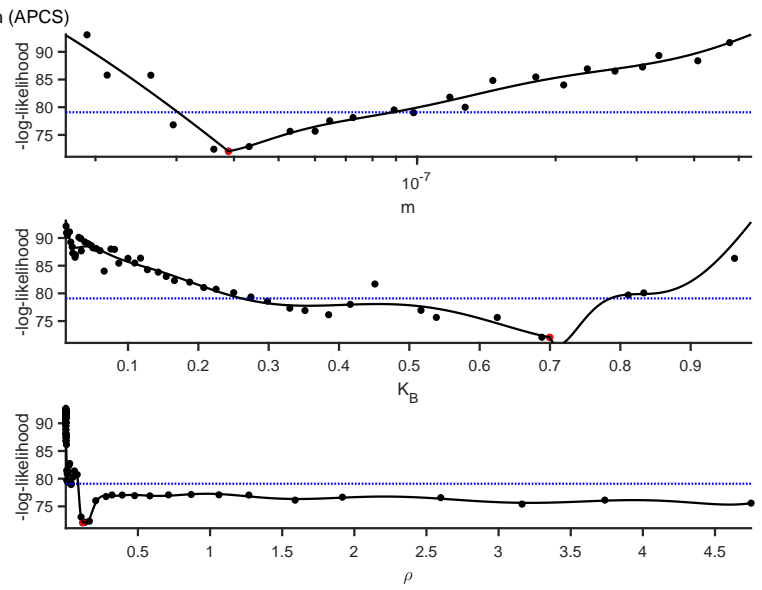

ROo13:Protection (APCS)

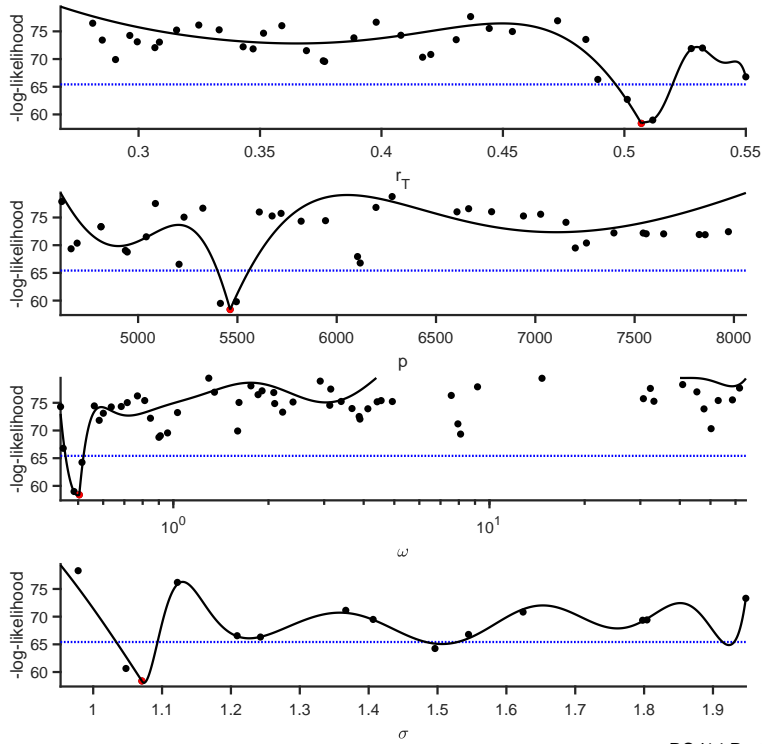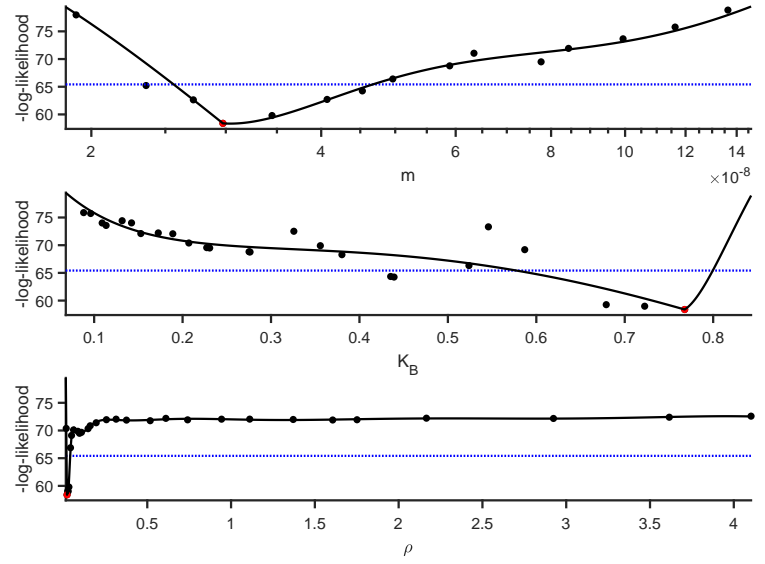

RSd14:Protection (APCS)

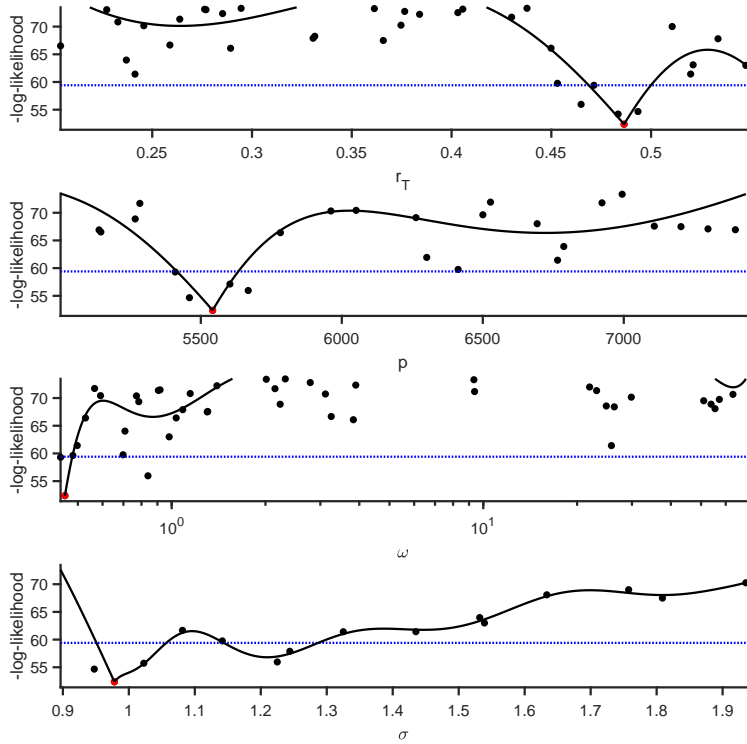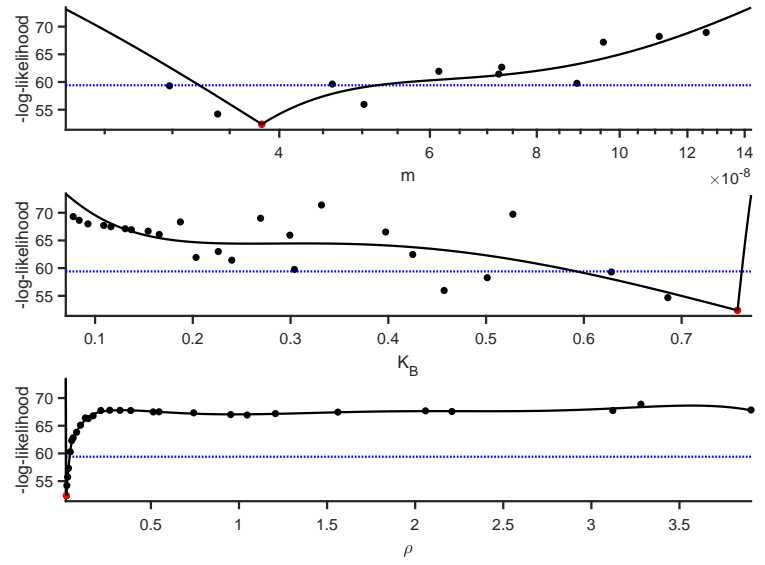

ROv14:Protection (APCS)

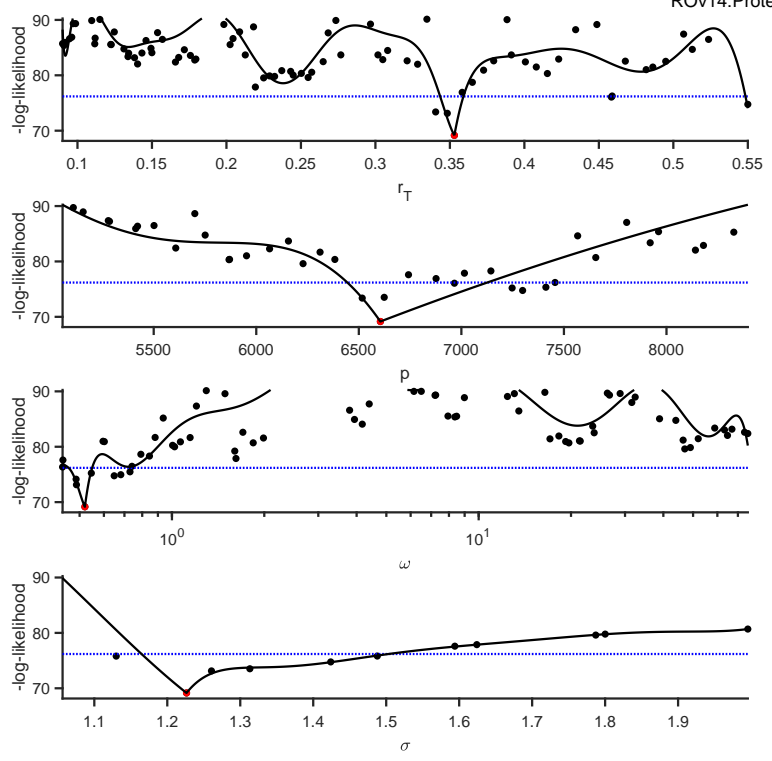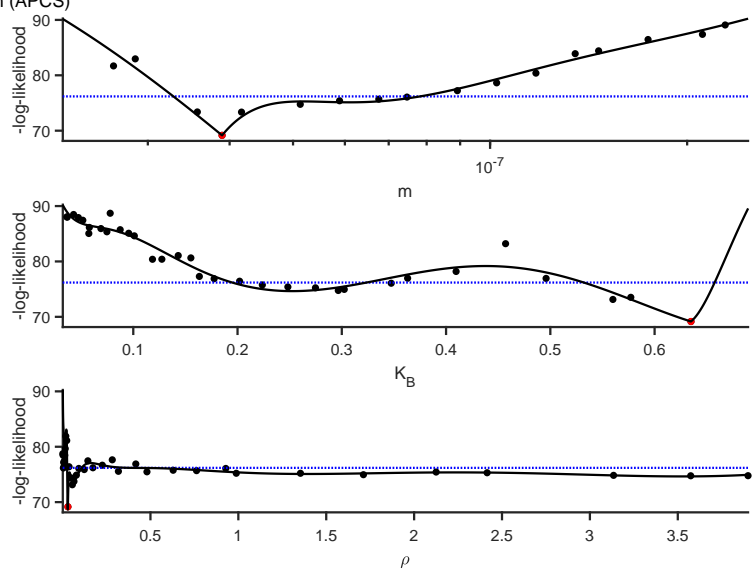

# 8 Sensitivity analysis: Protection

## 8.1 Baseline effector cell source model

ROq14:Protection (BL)

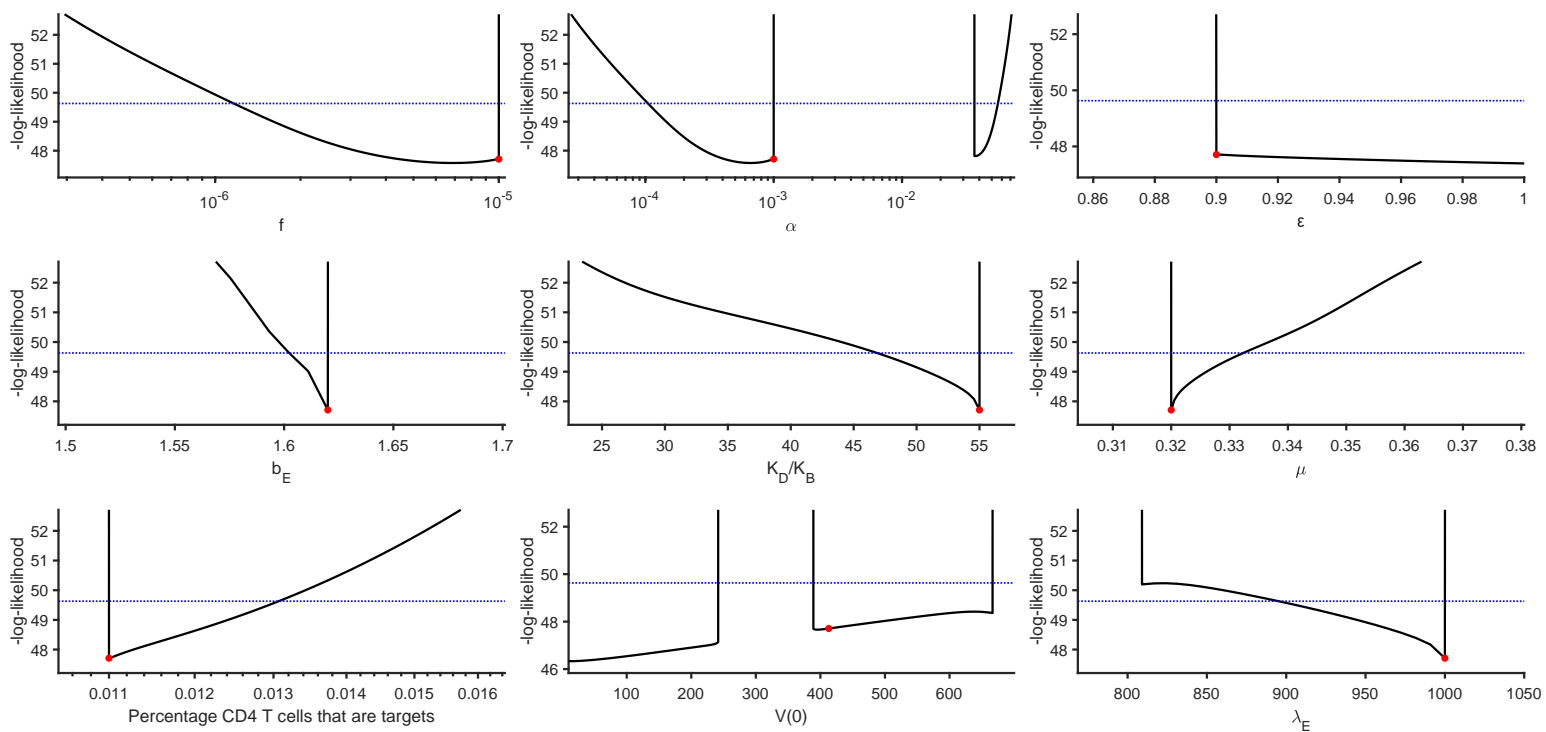

RDa15:Protection (BL)

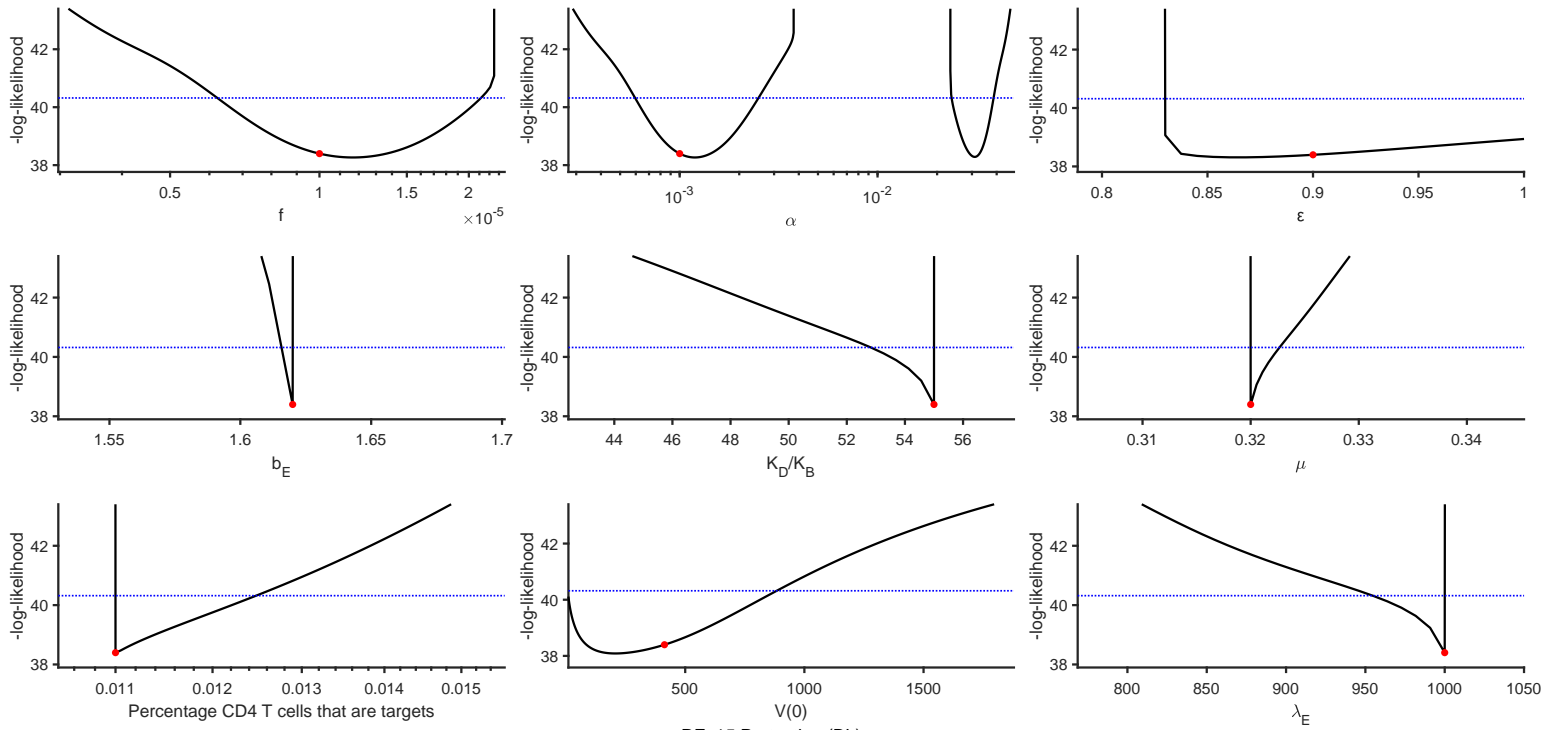

RFa15:Protection (BL)

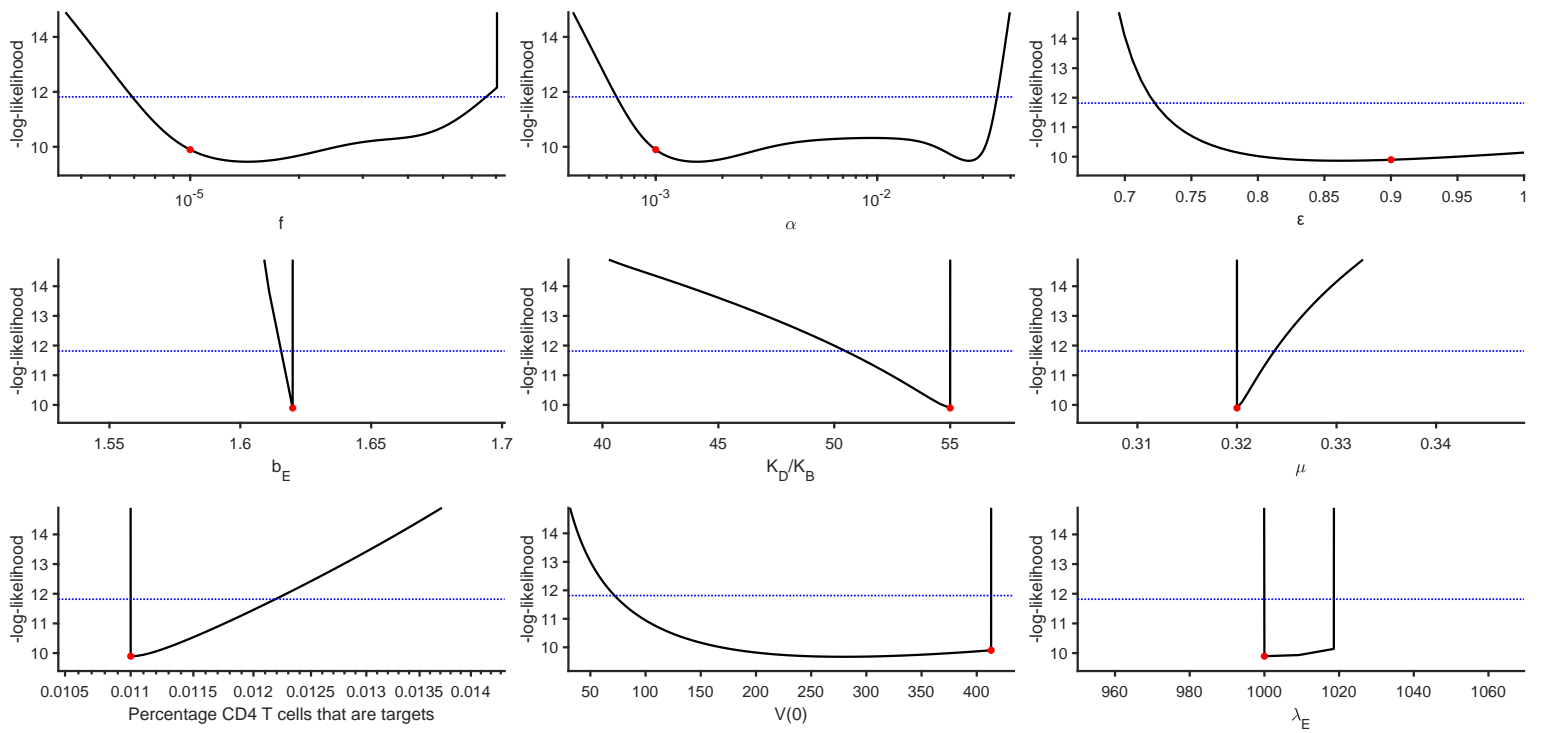

RLn12:Protection (BL)

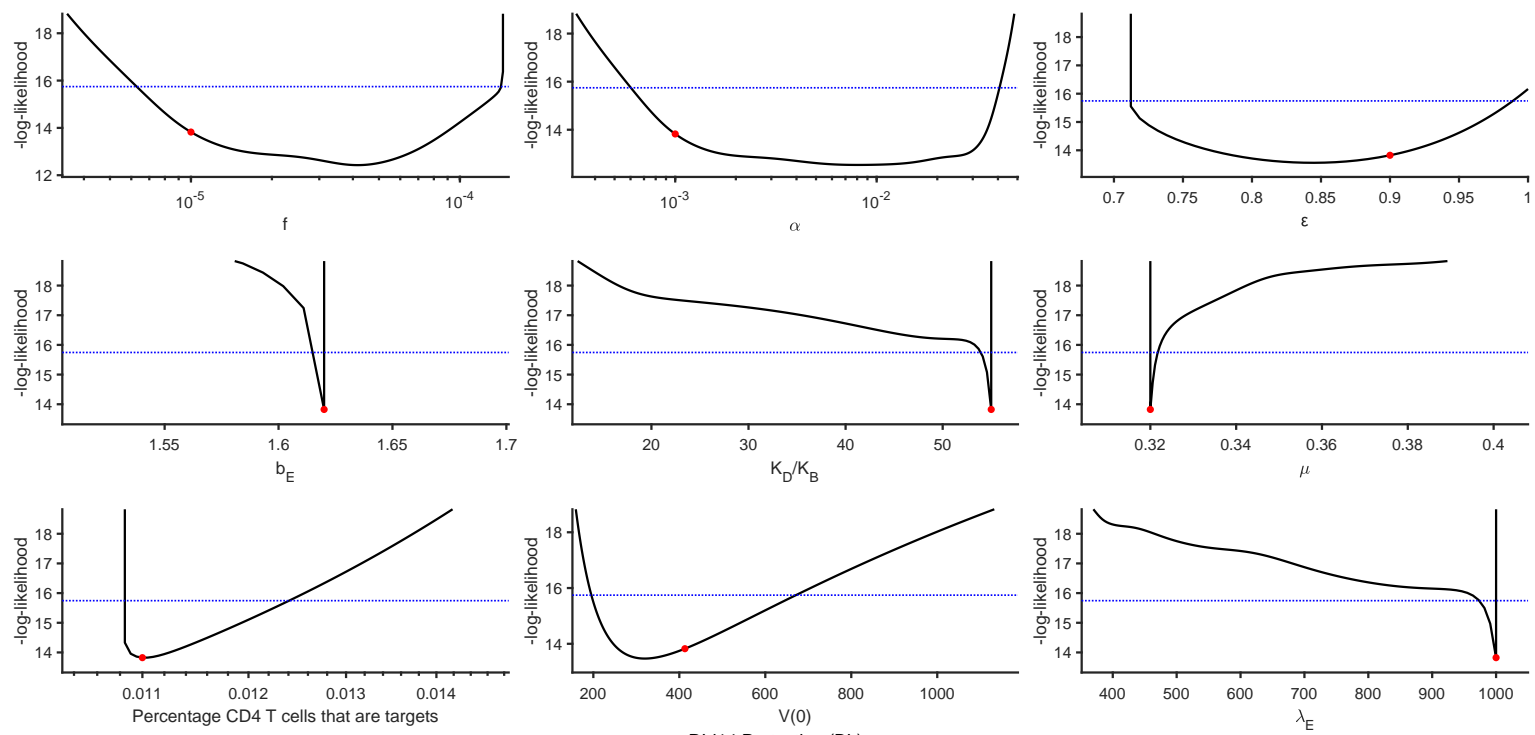

Rld14:Protection (BL)

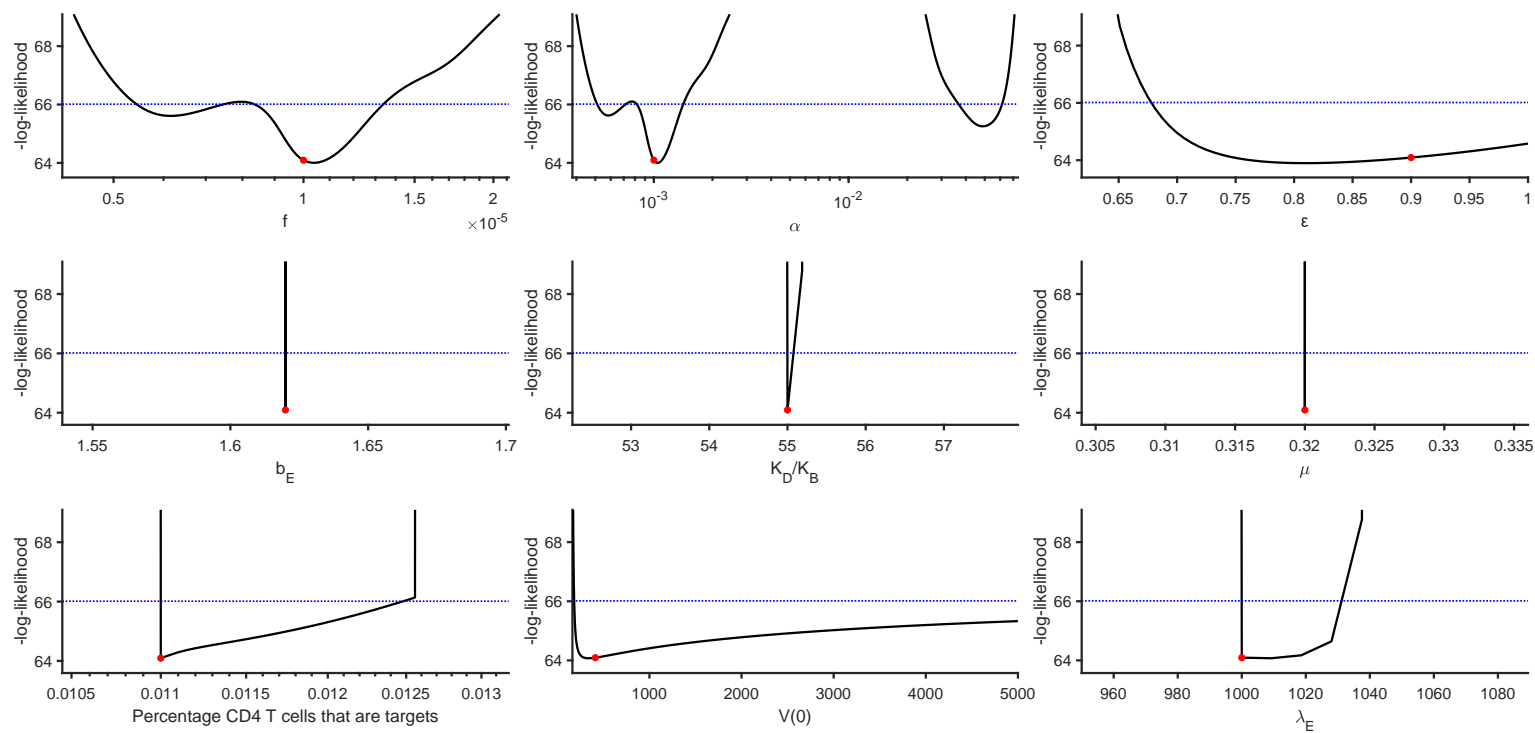

ROo13:Protection (BL)

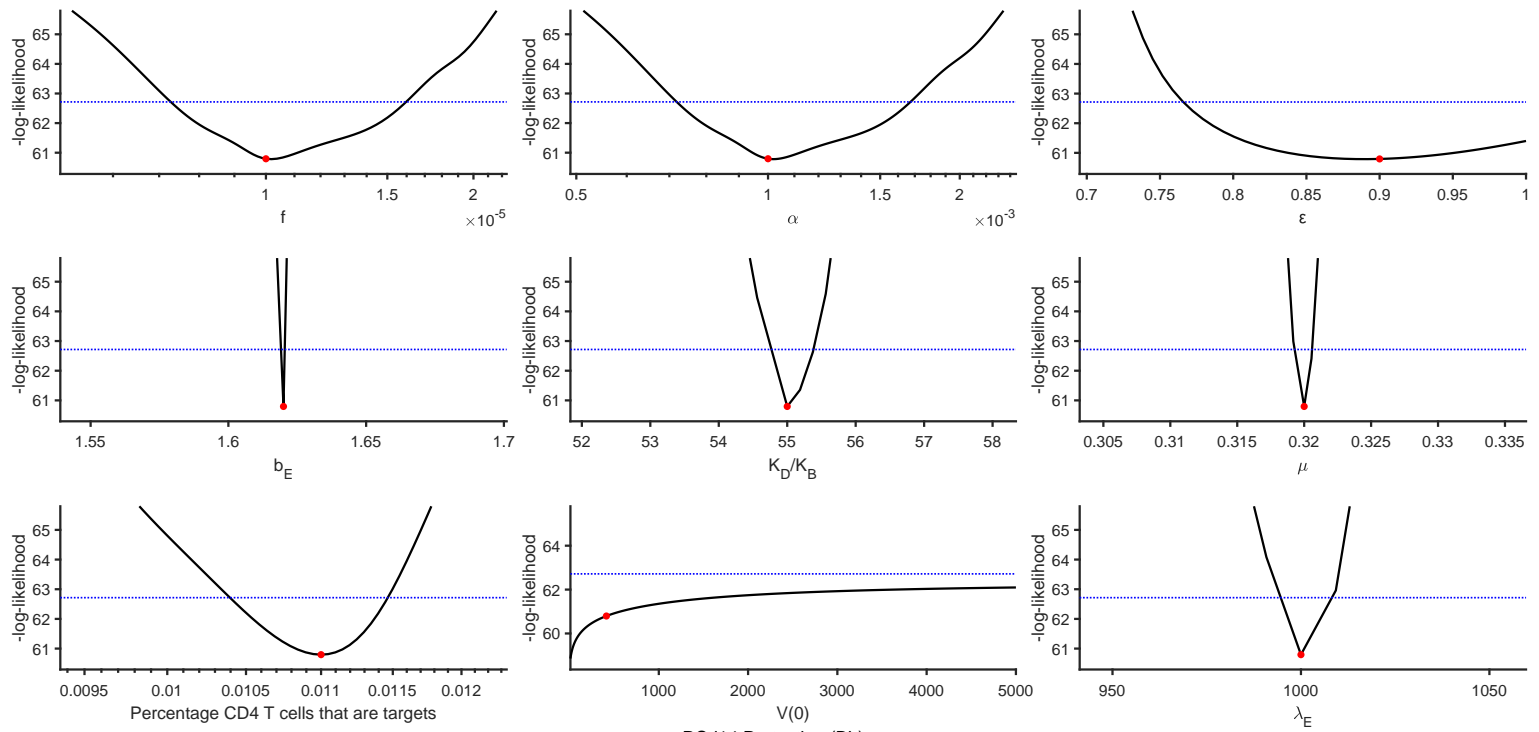

RSd14:Protection (BL)

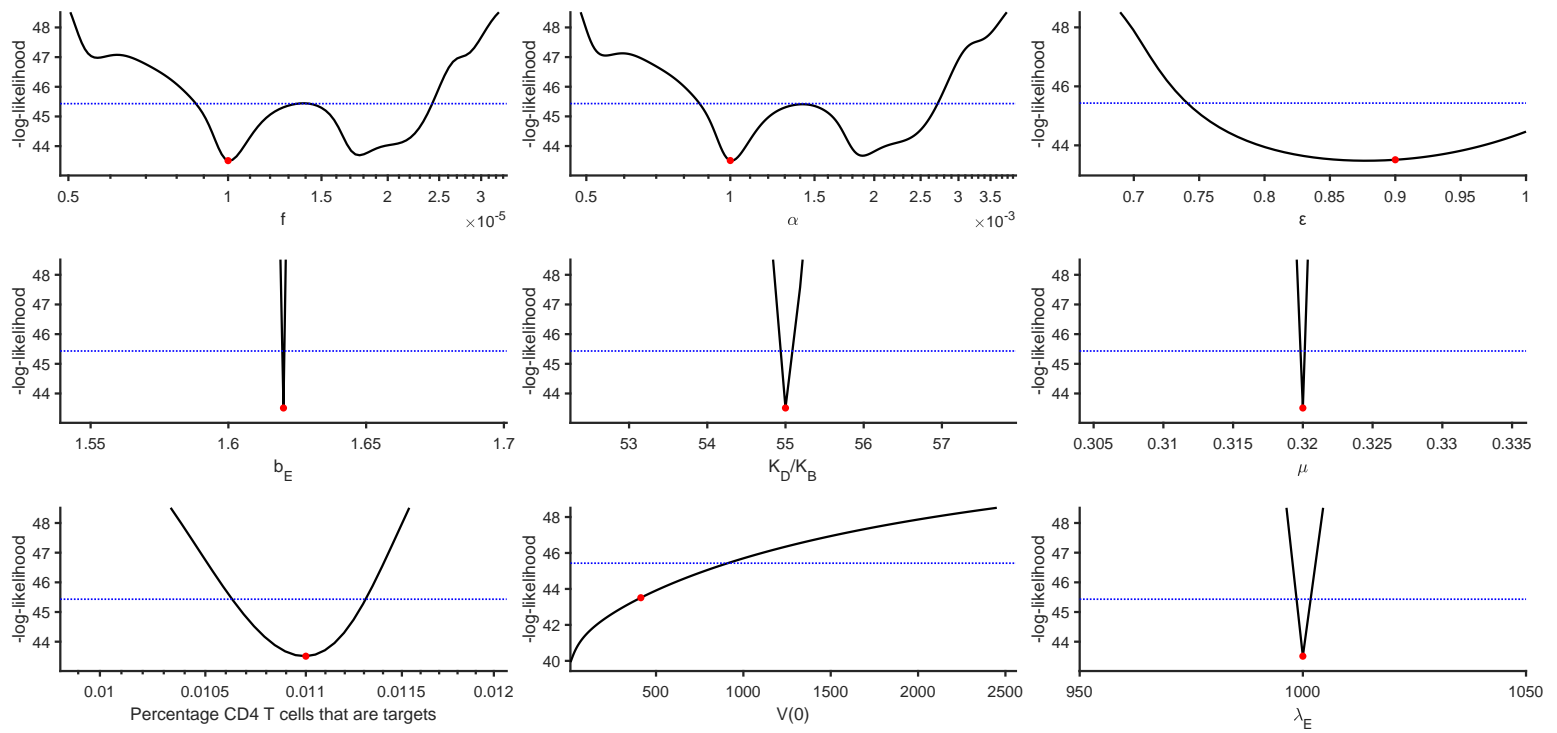



ROV14:Protection (BL)

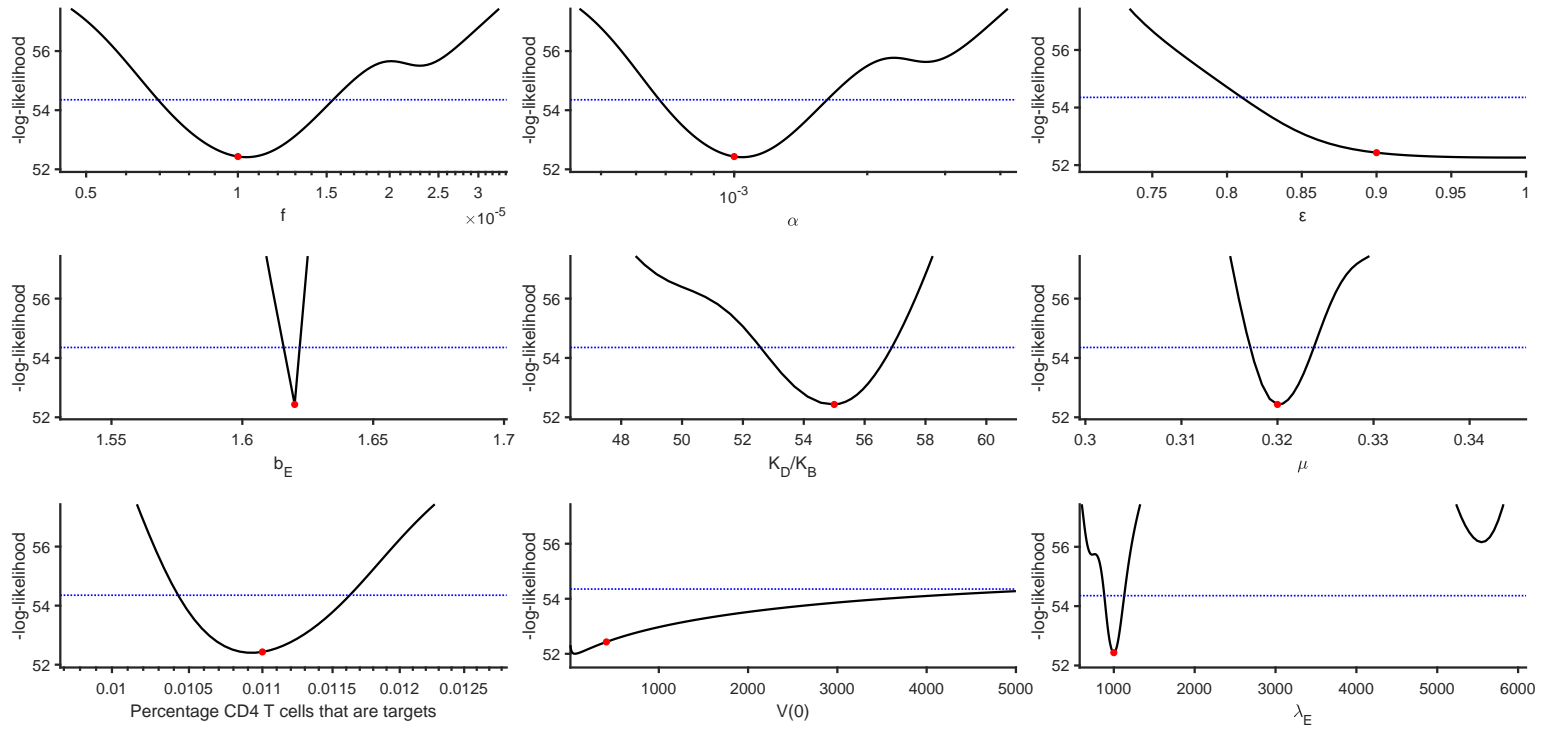

## 8.2 Saturated effector cell source model

ROq14:Protection (SS)

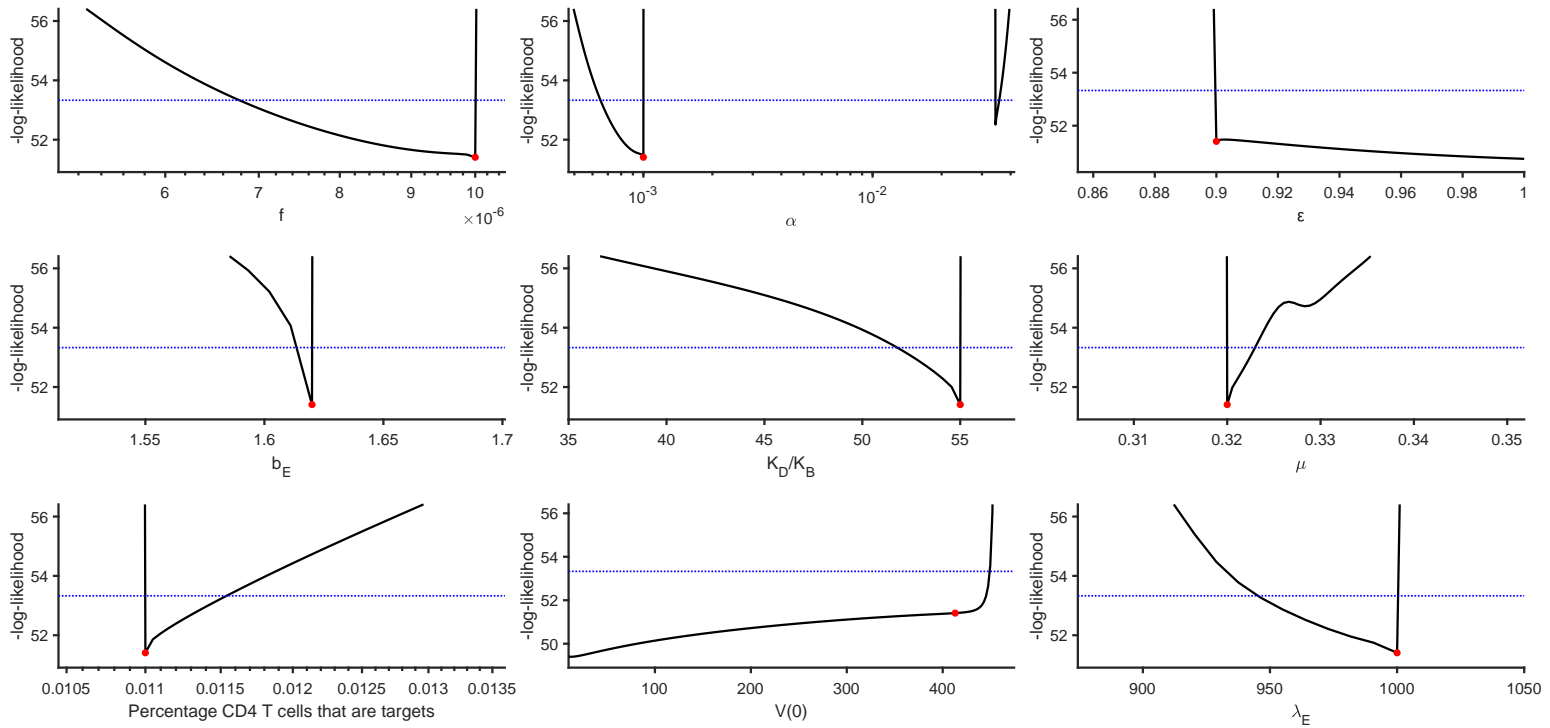

RDa15:Protection (SS)

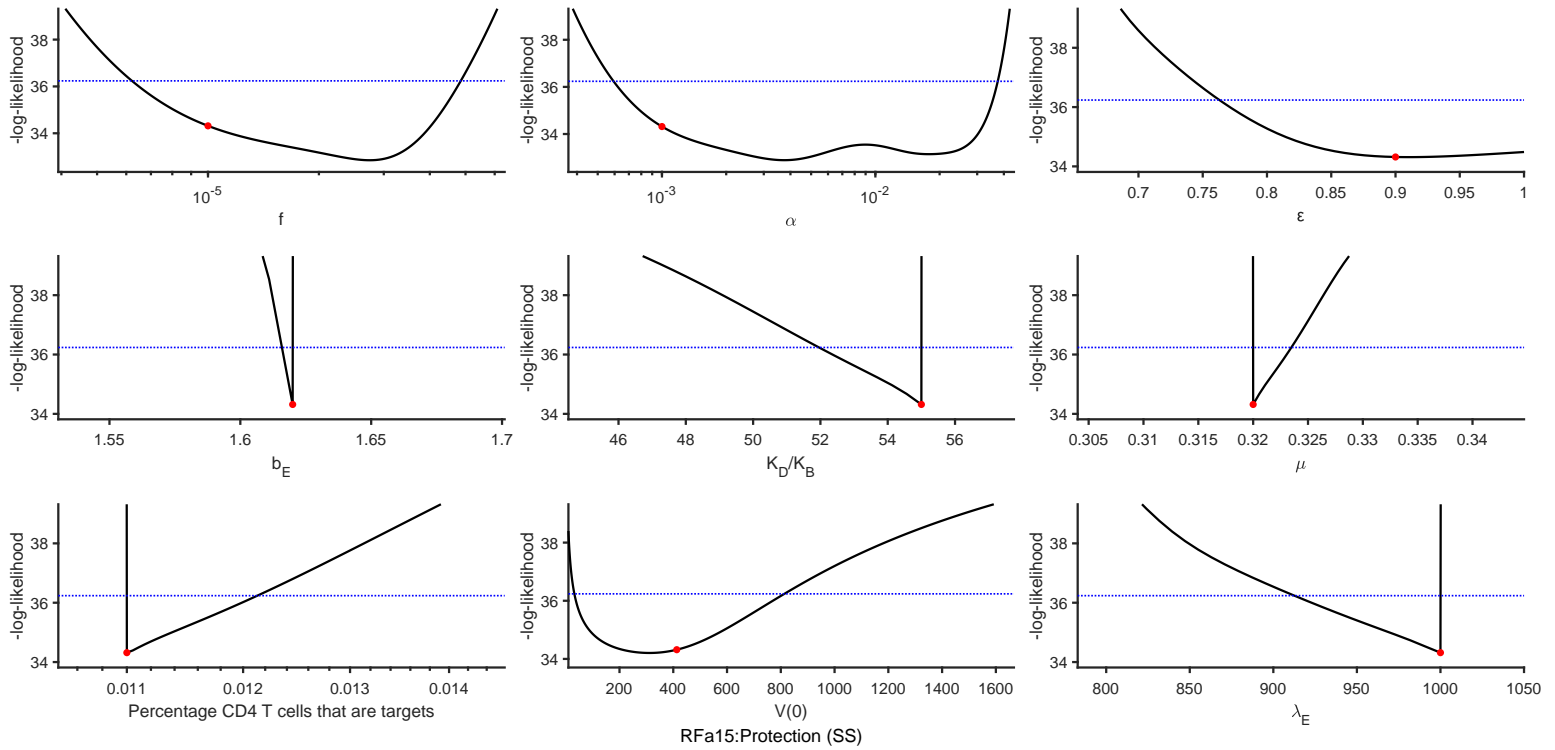

RFa15:Protection (SS)

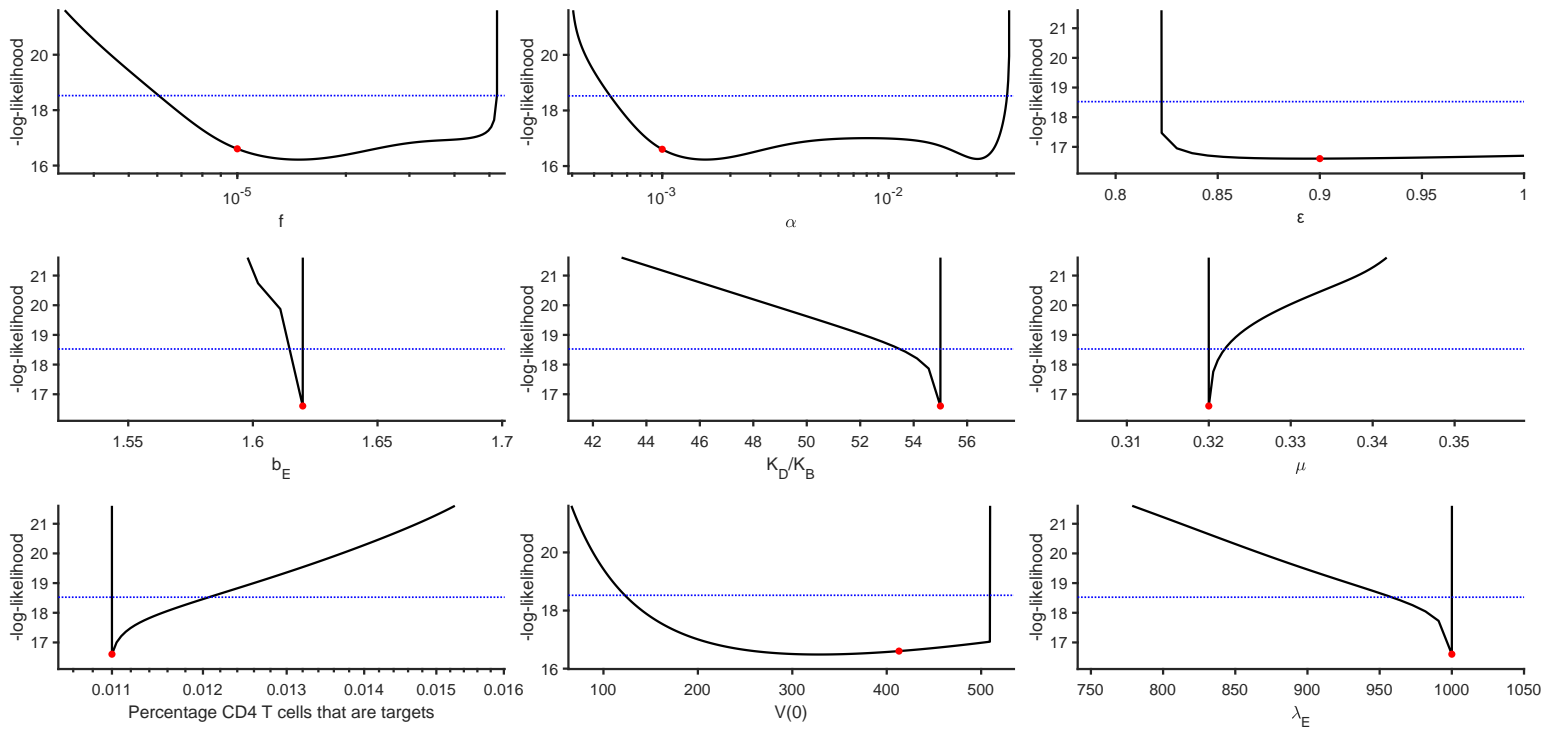

RLn12:Protection (SS)

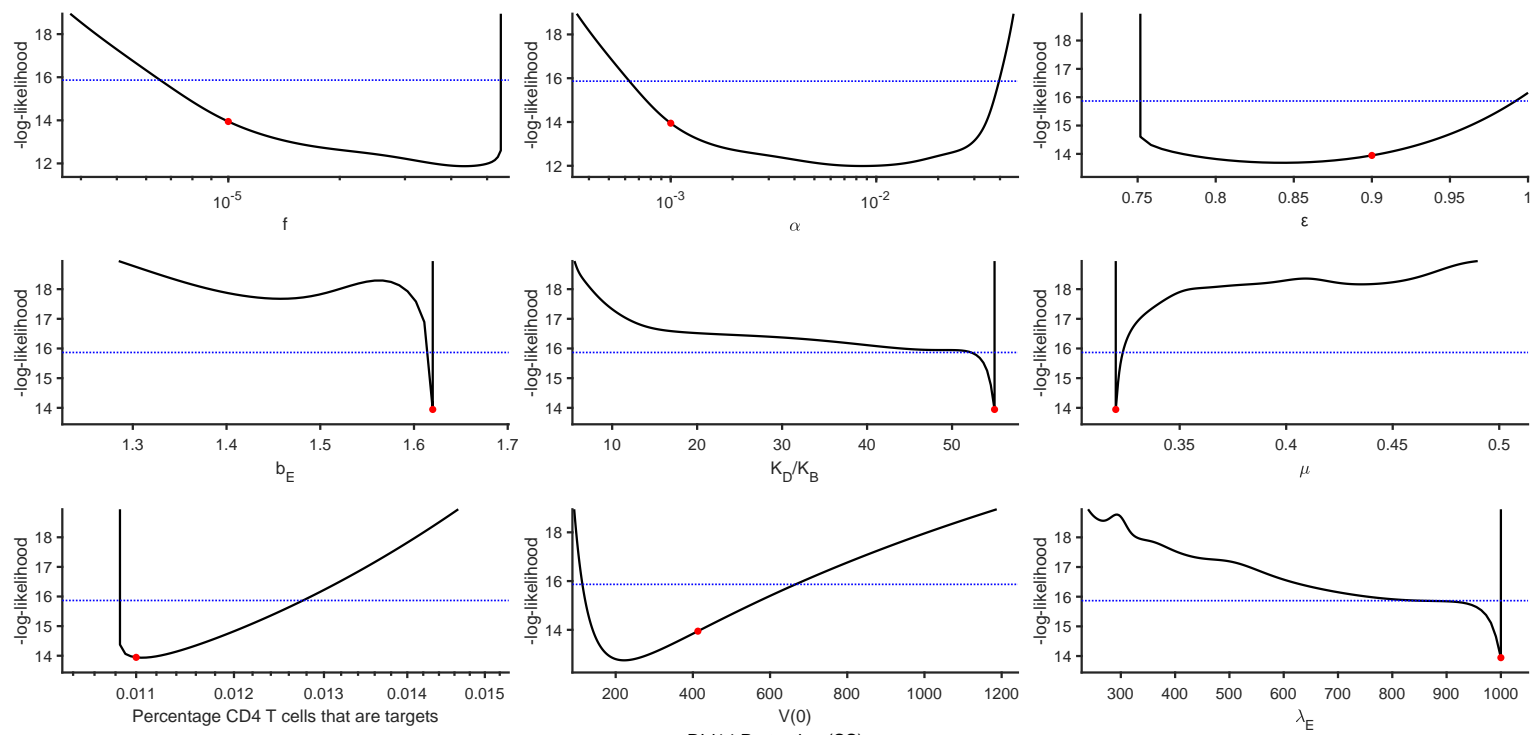

Rld14:Protection (SS)

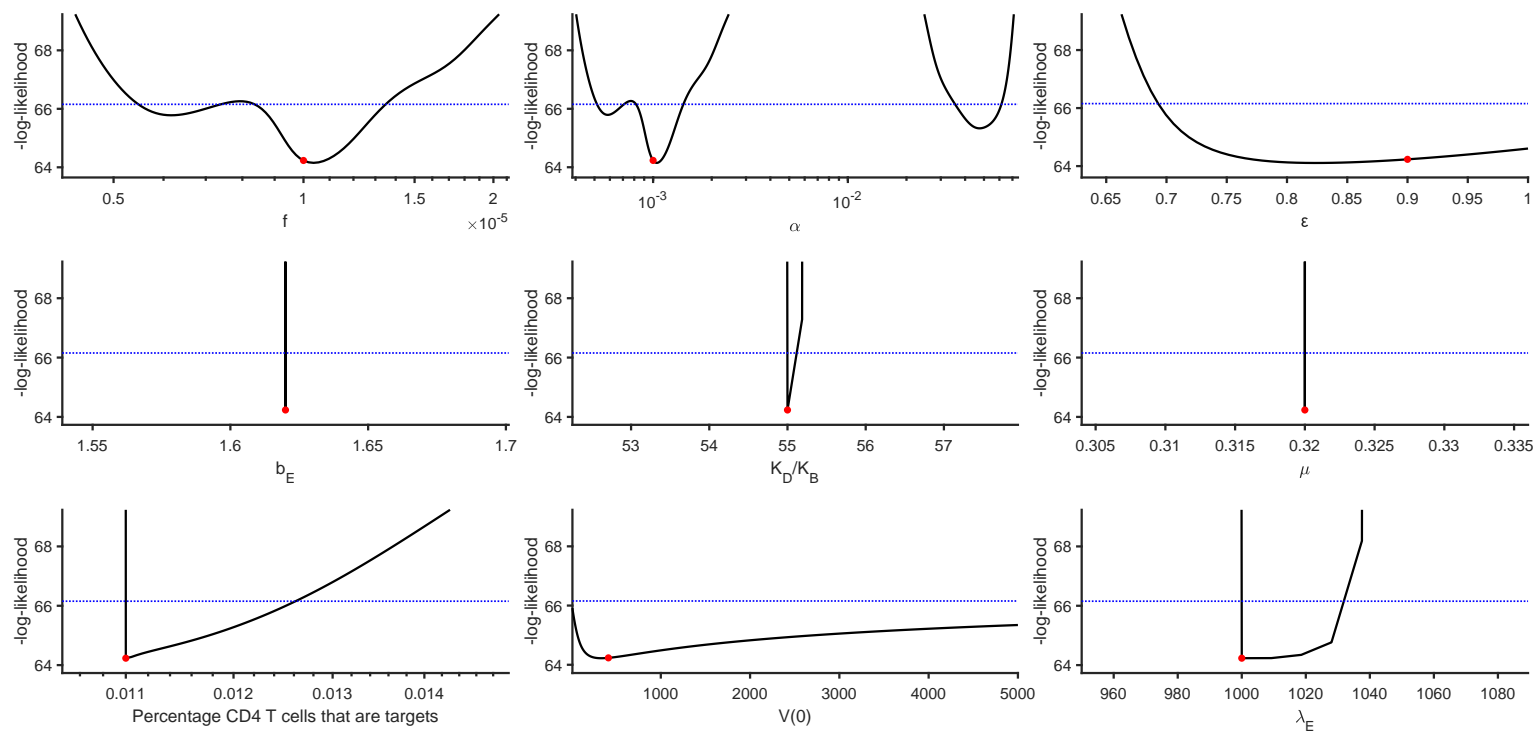

ROo13:Protection (SS)

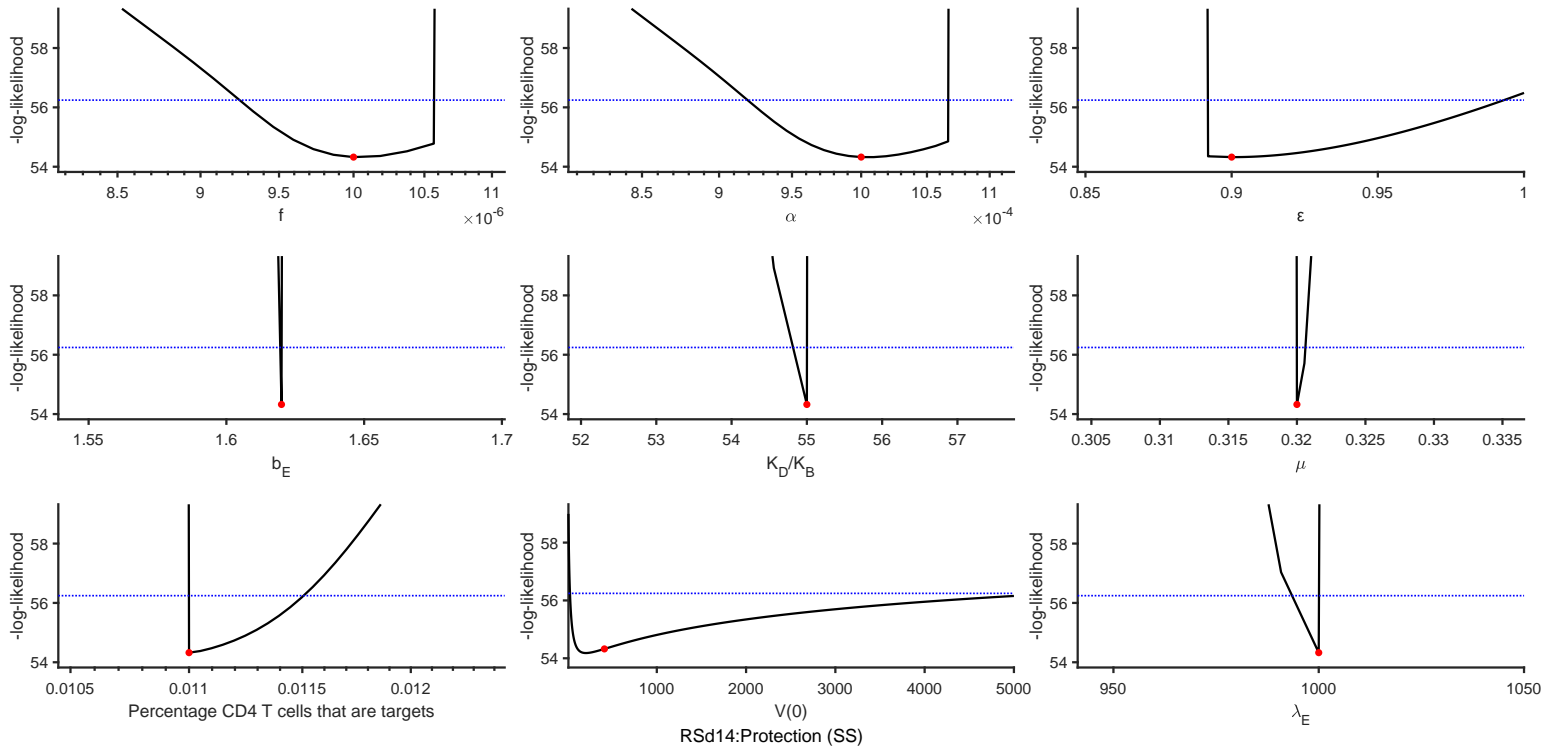

RSd14:Protection (SS)

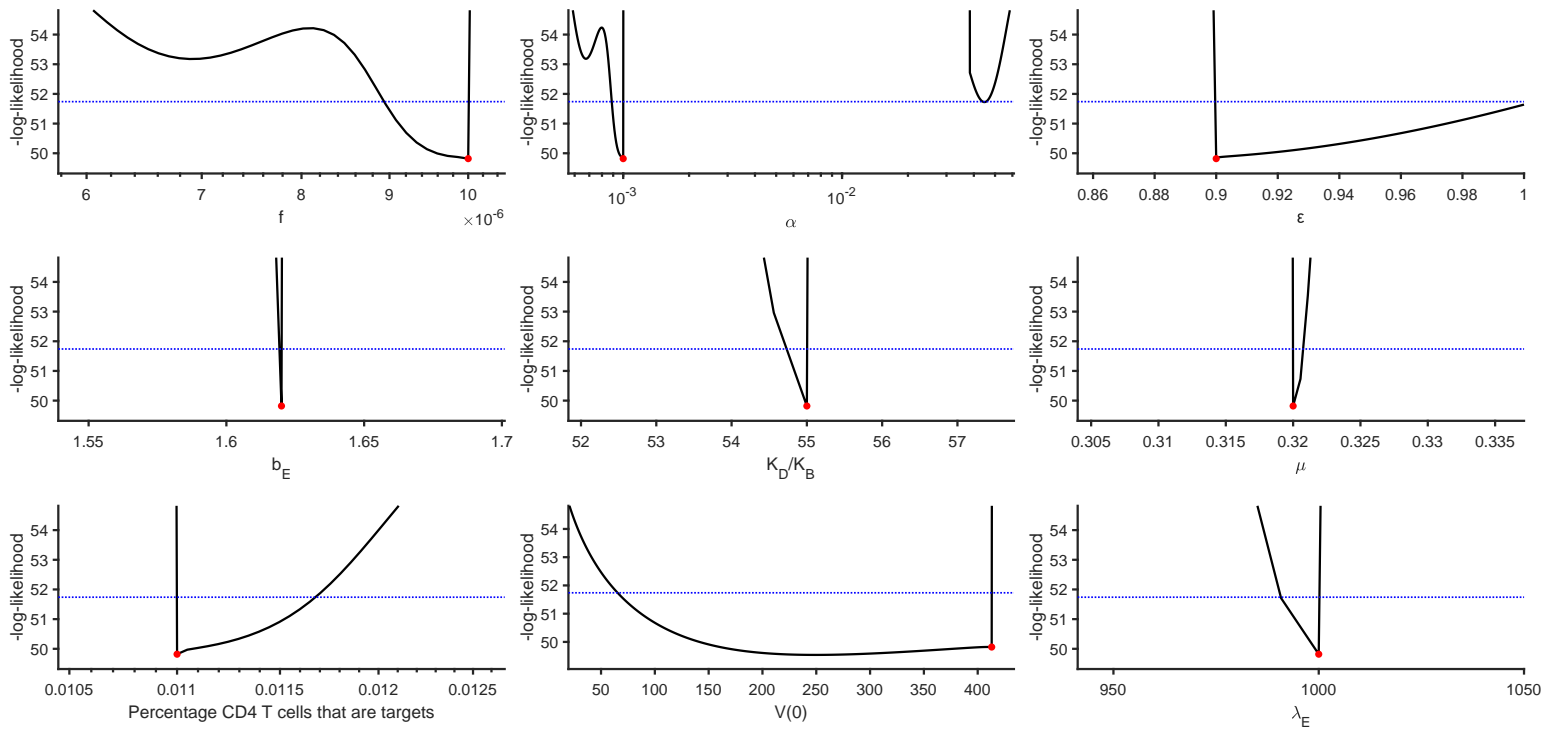

ROv14:Protection (SS)

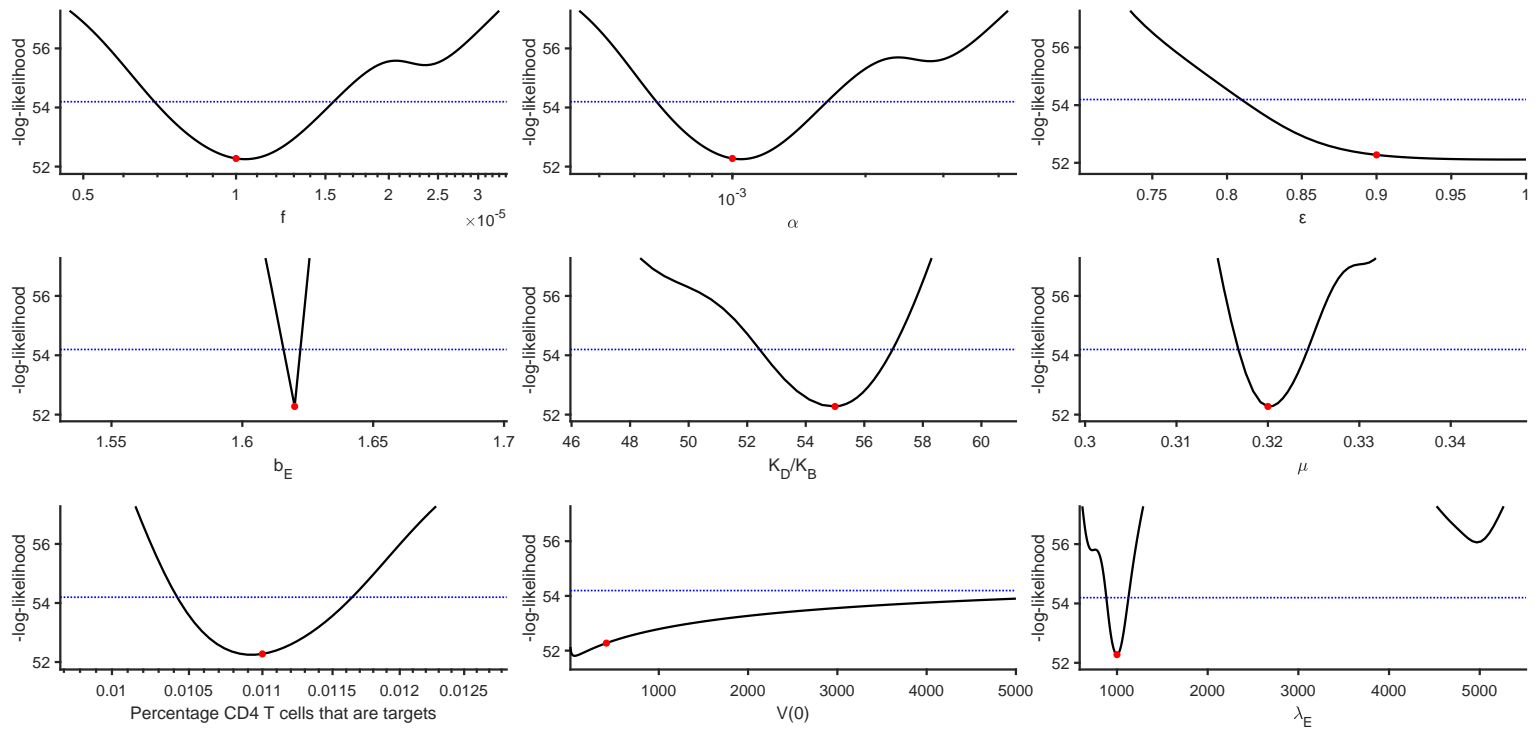

### 8.3 Antigen presenting cell effector cell source model

ROq14:Protection (APCS)

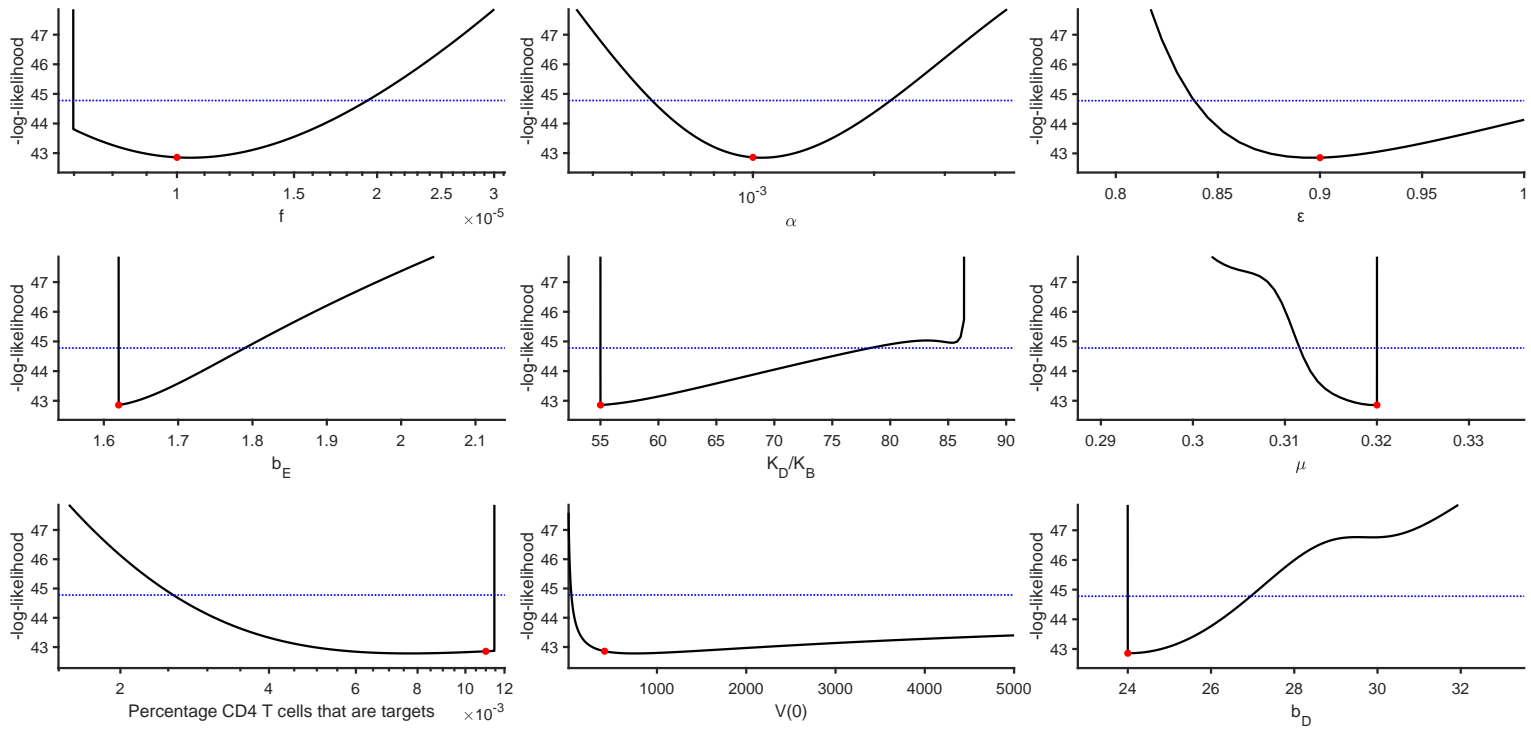

RDa15:Protection (APCS)

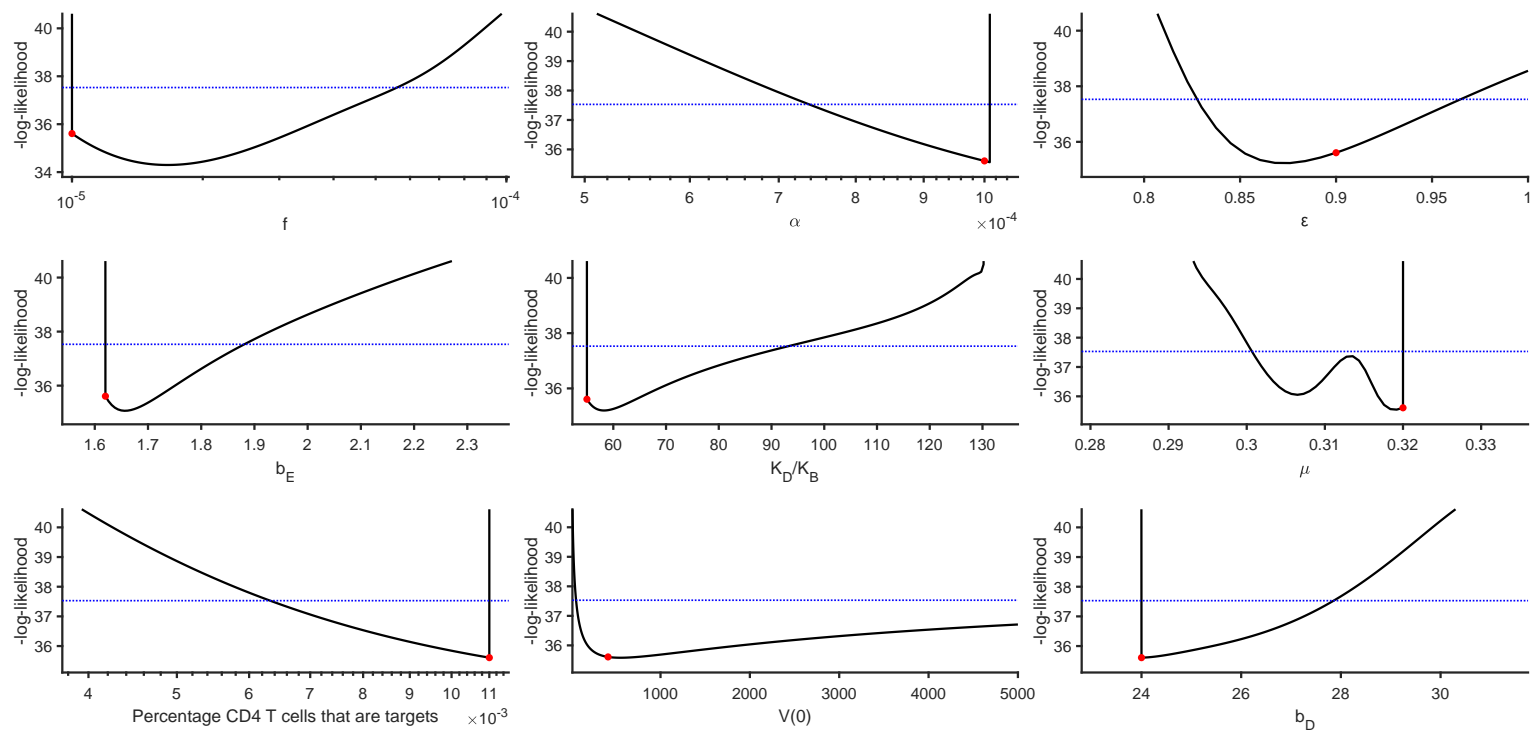

RFa15:Protection (APCS)

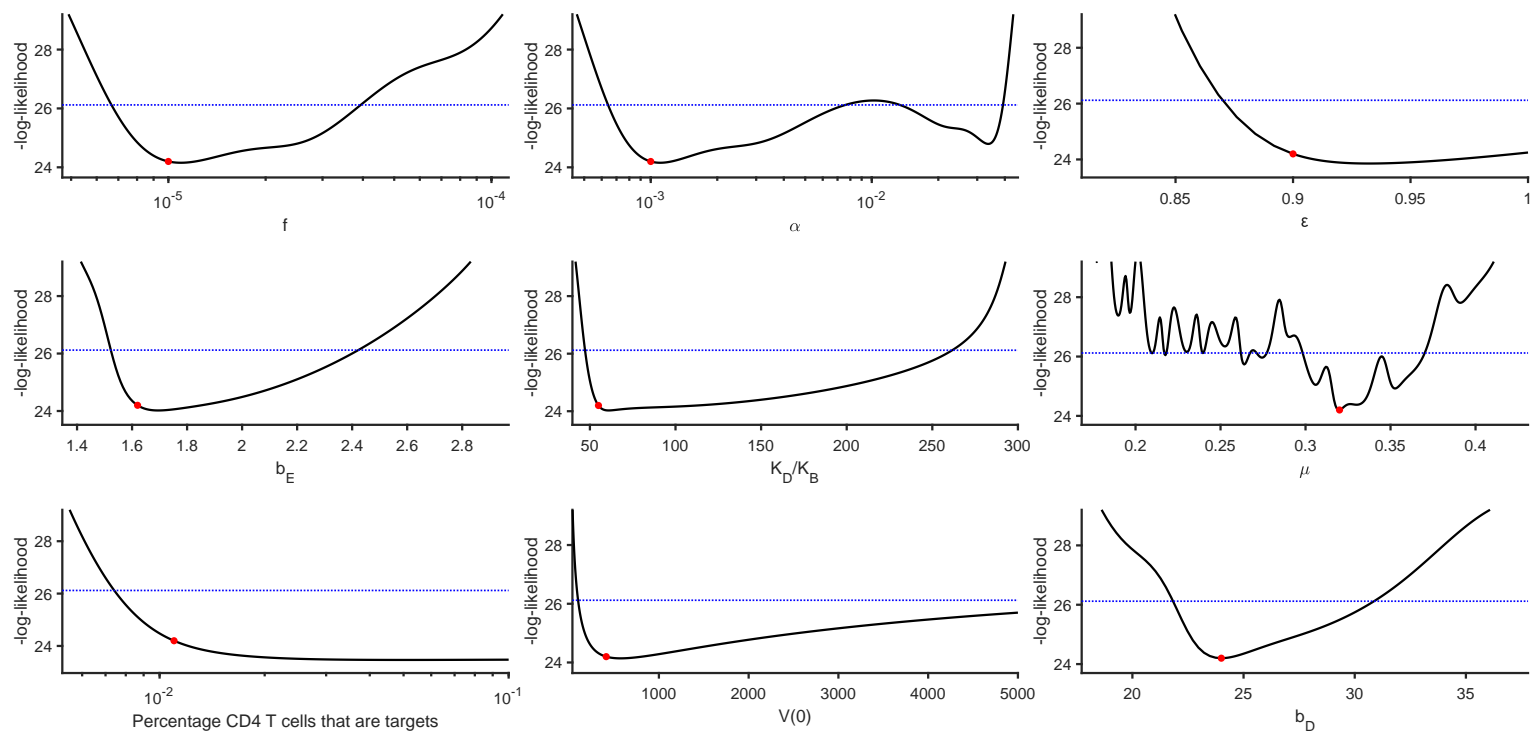



RLn12:Protection (APCS)

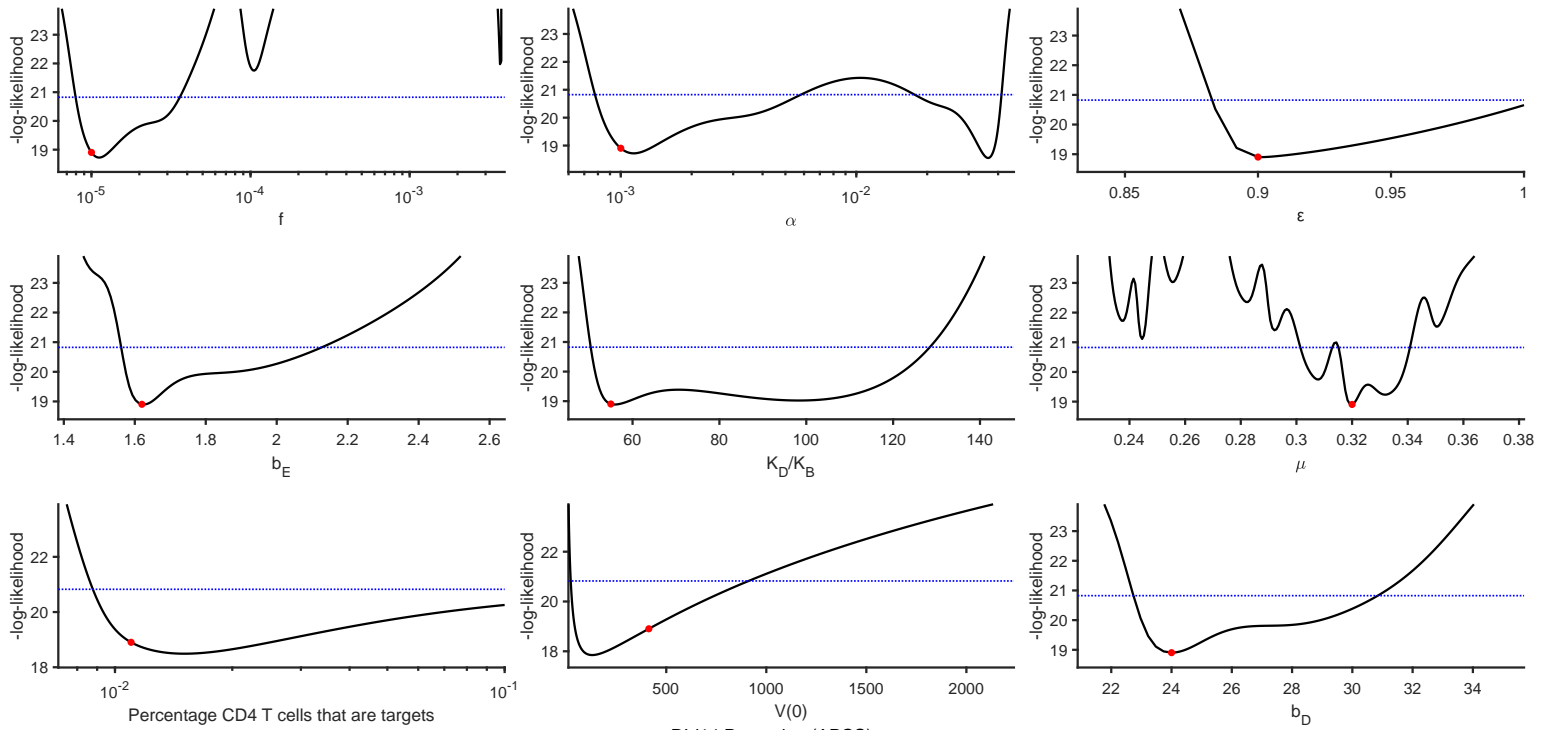

Rl14:Protection (APCS)

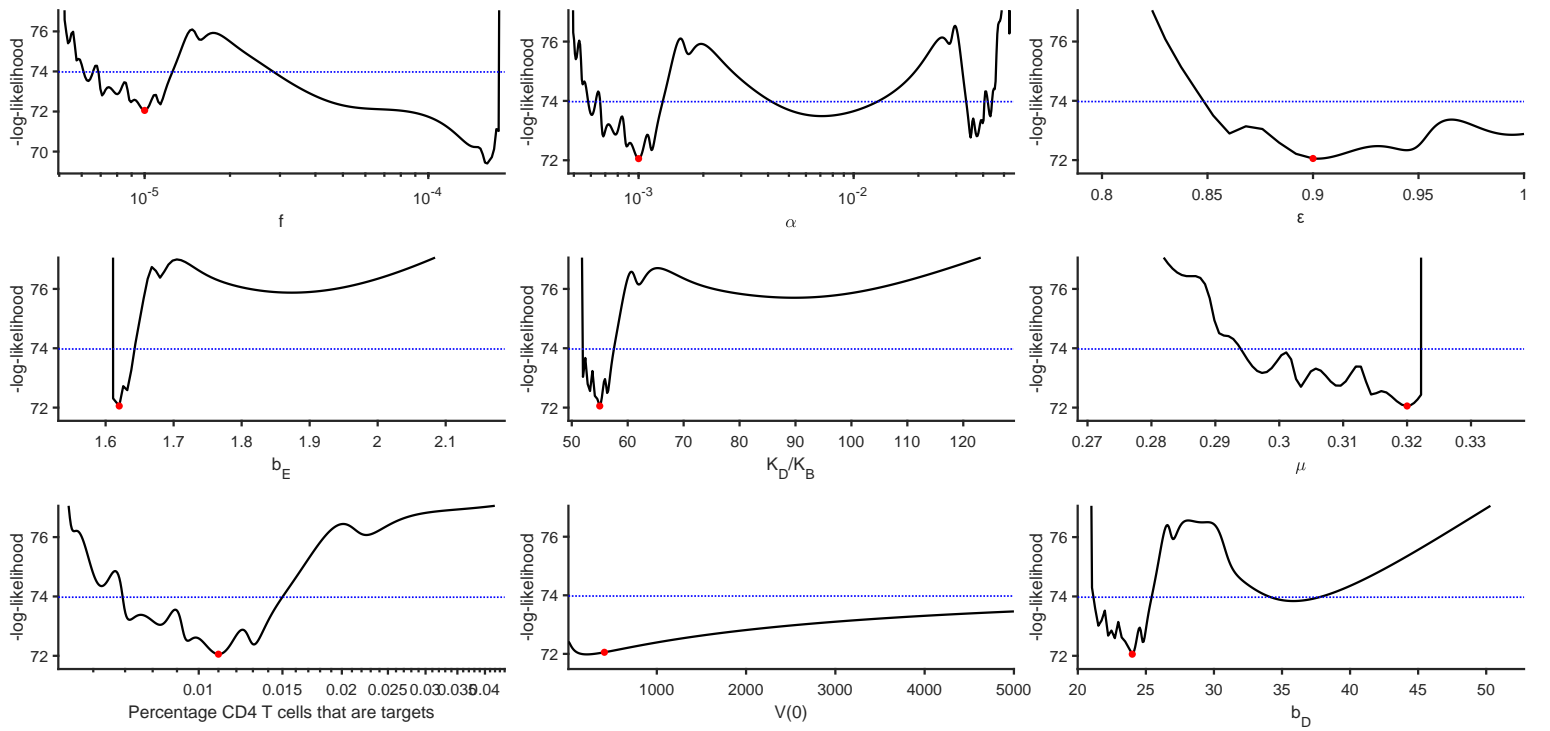

ROo13:Protection (APCS)

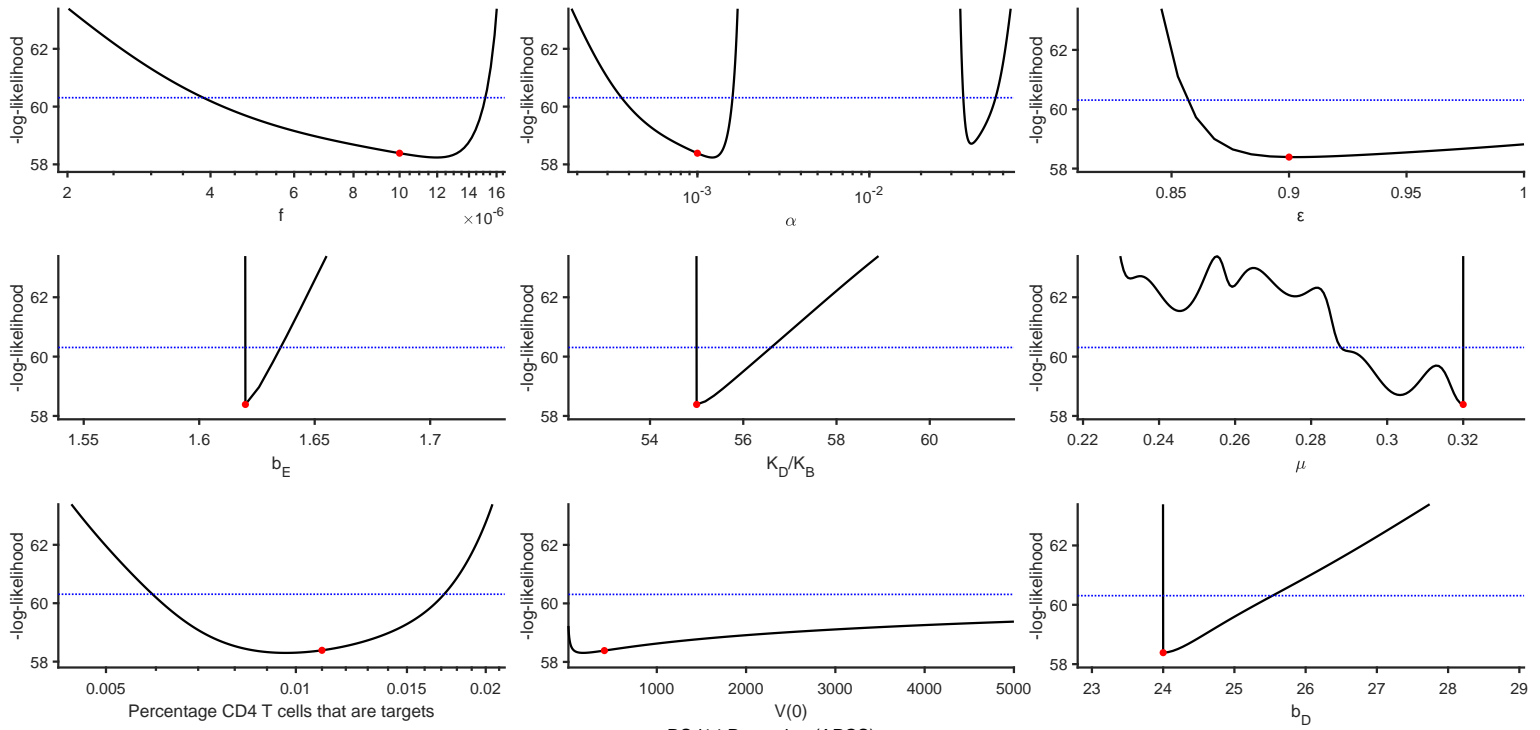

RSd14:Protection (APCS)

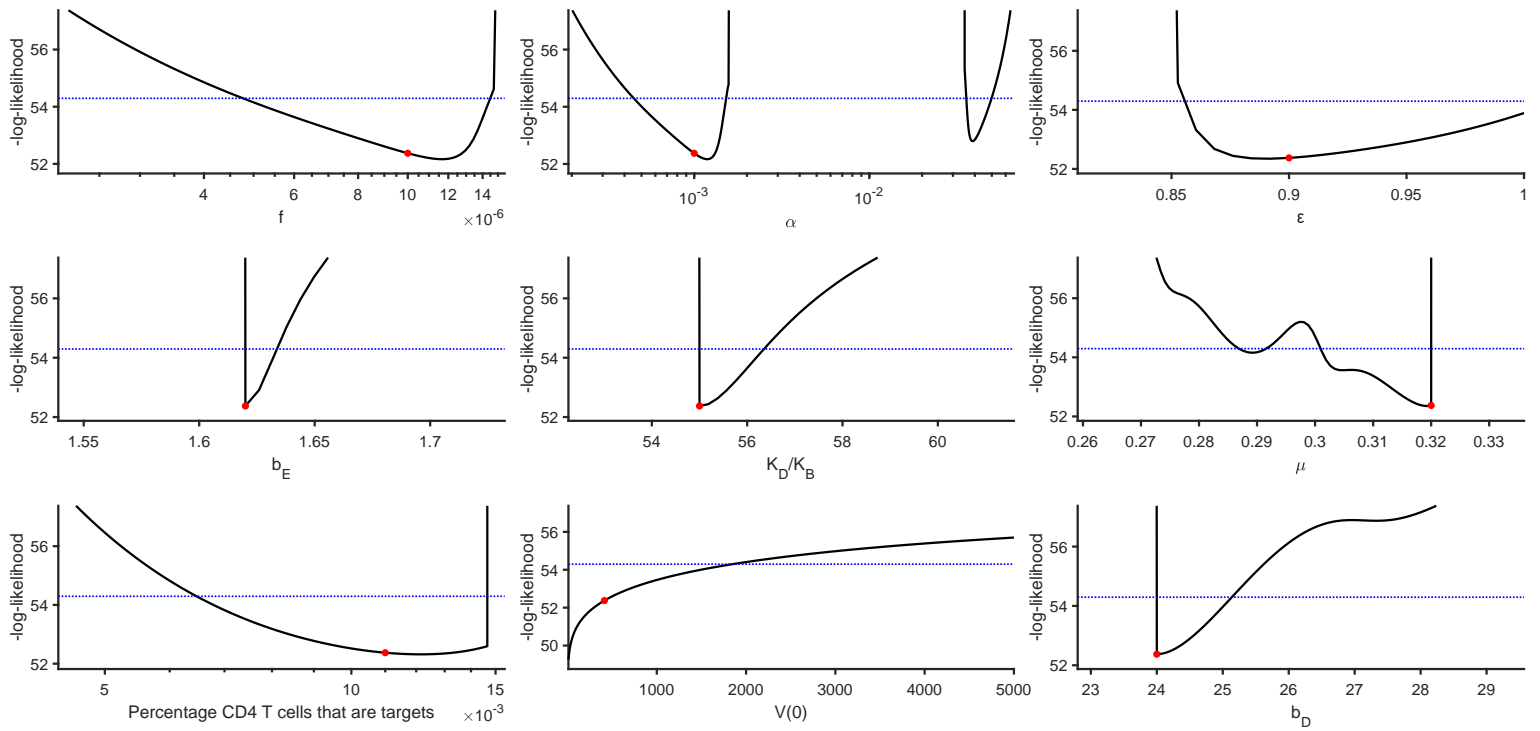

ROv14:Protection (APCS)

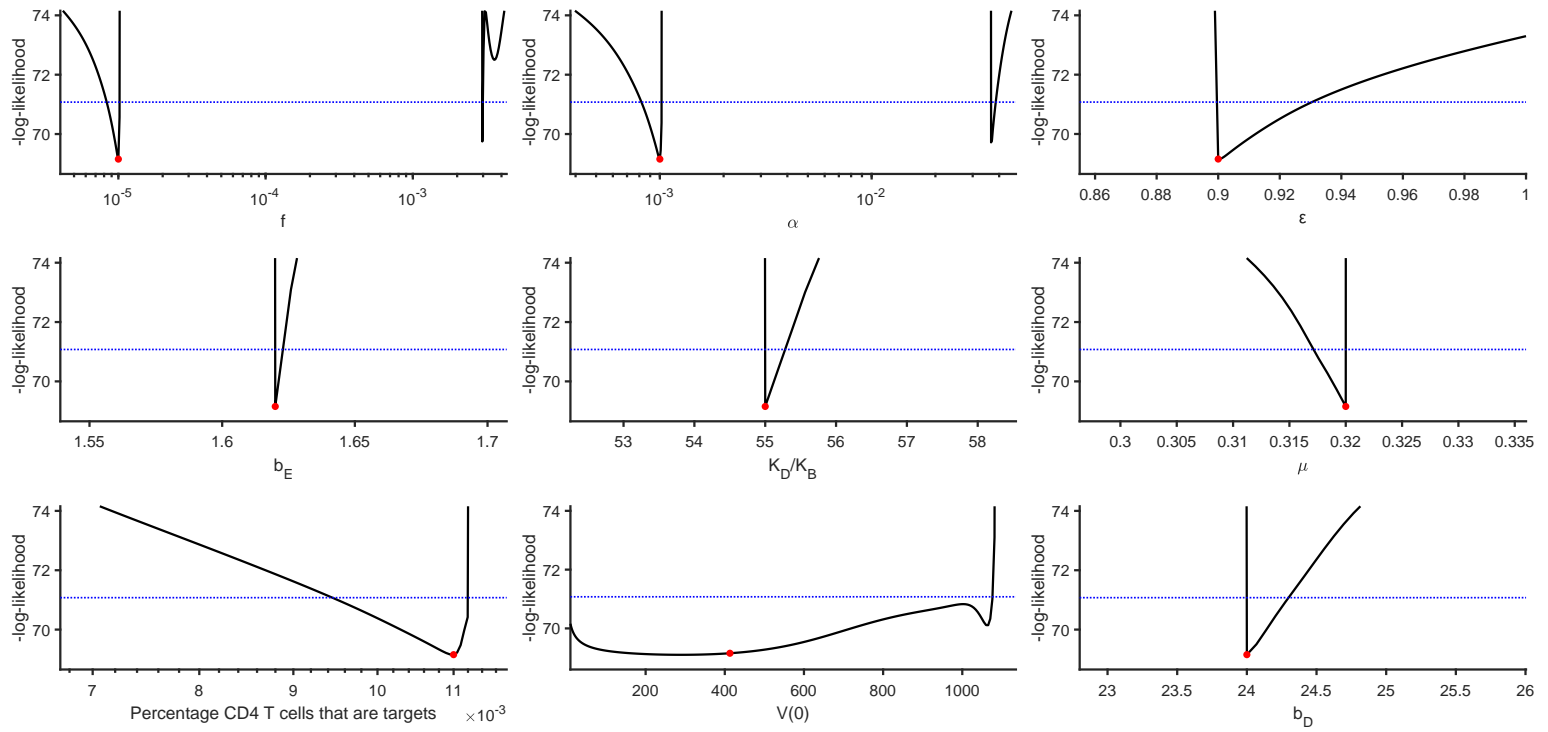

# 9 Likelihood profiles: Increased antigen presentation

## 9.1 Baseline effector cell source model

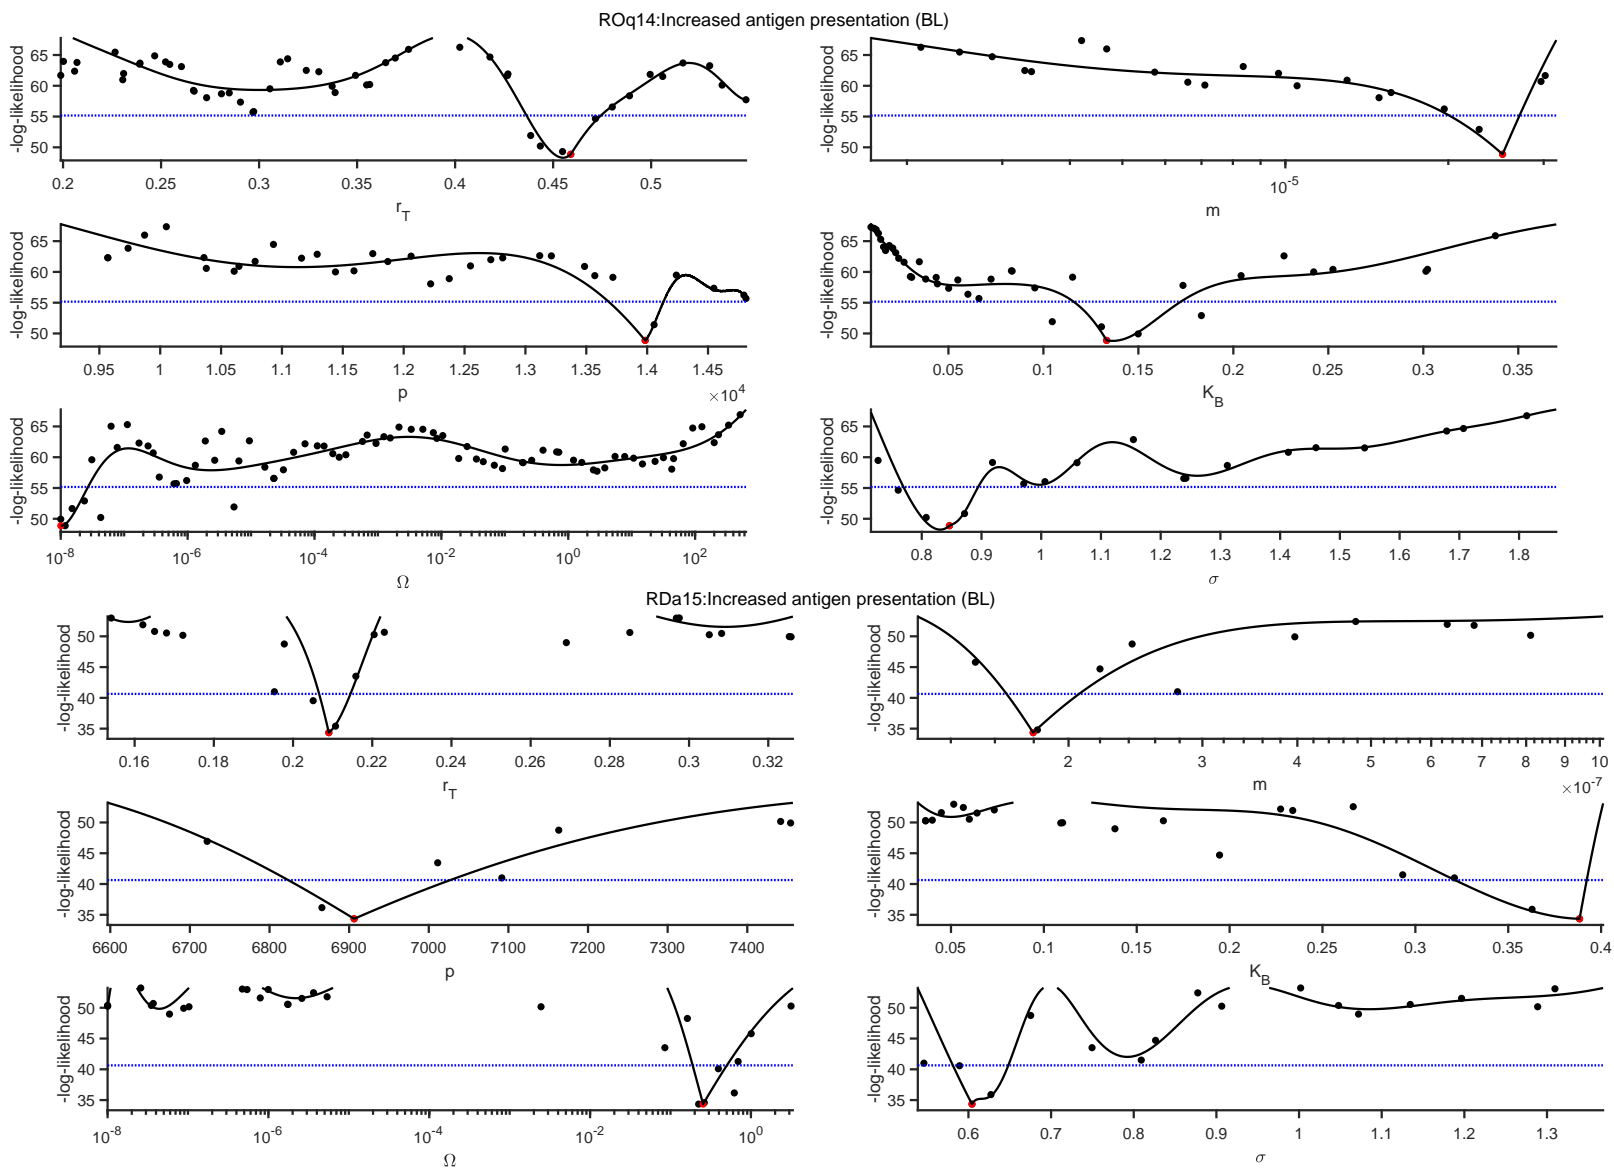

RFa15:Increased antigen presentation (BL)

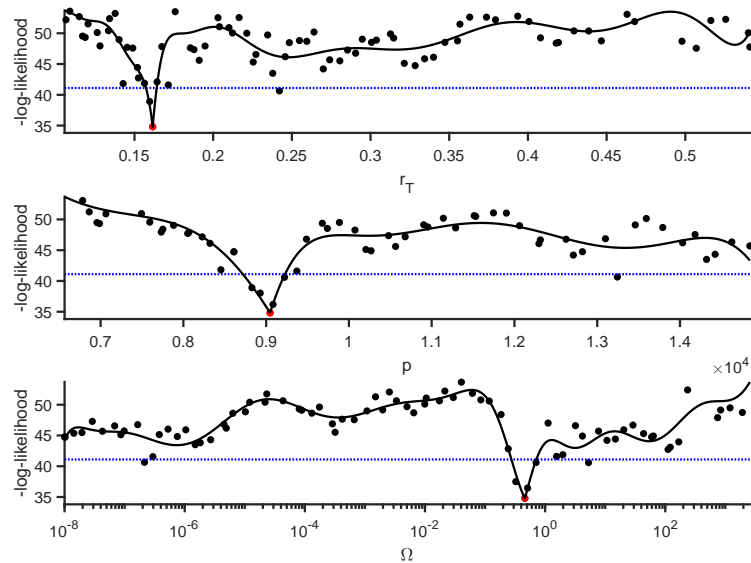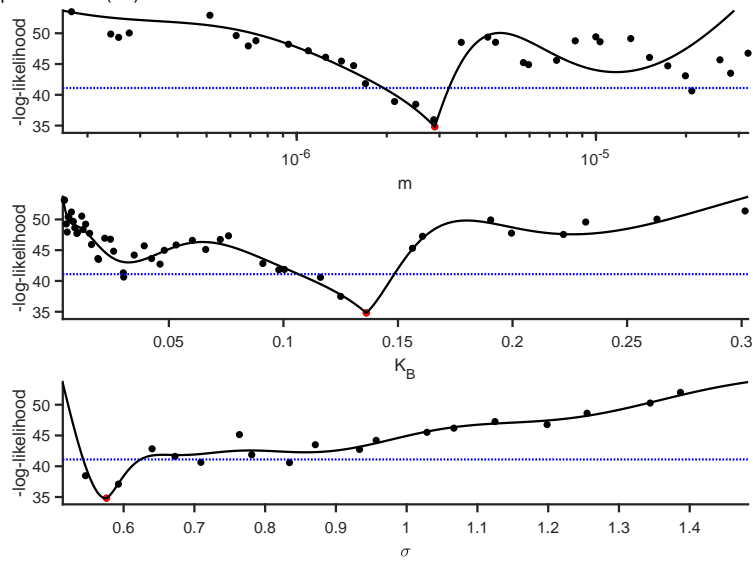

RLn12:Increased antigen presentation (BL)

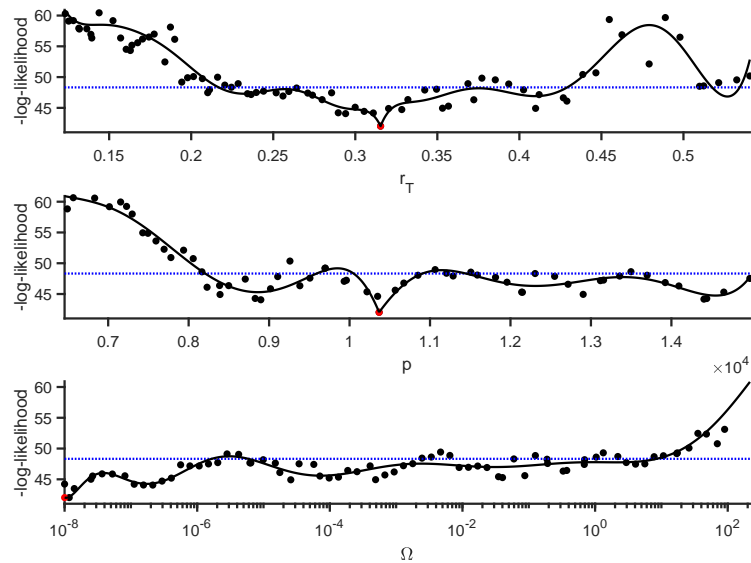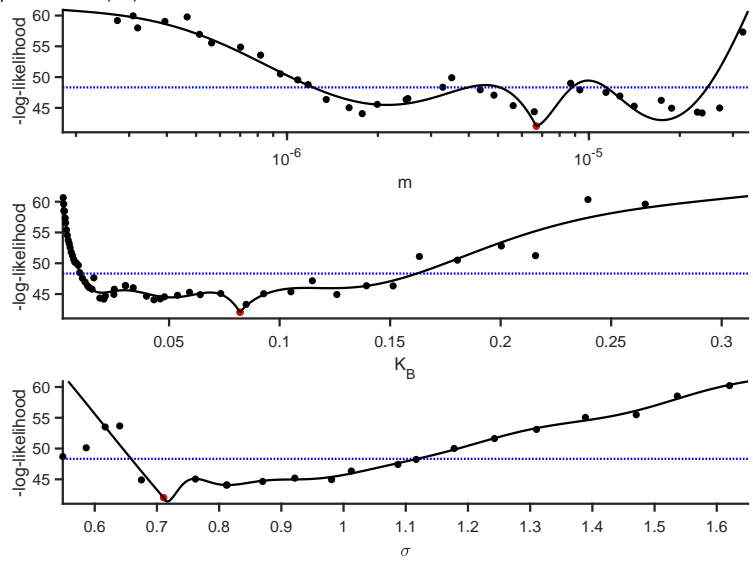

RId14: Increased antigen presentation (BL)

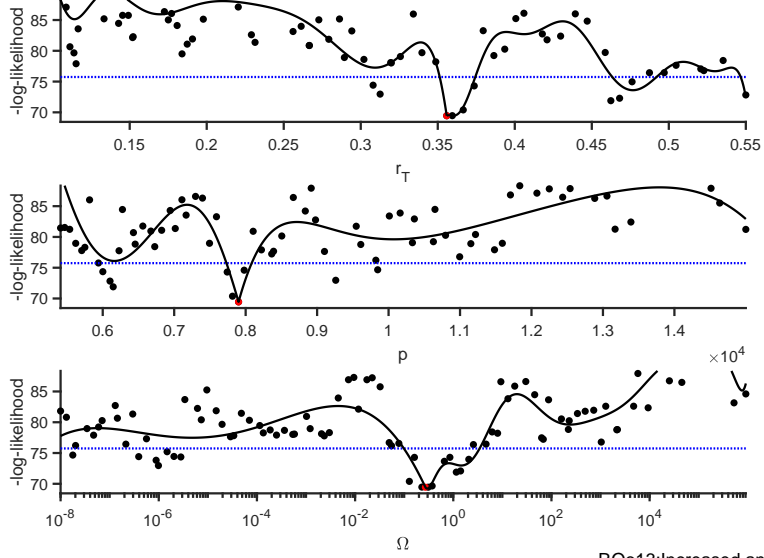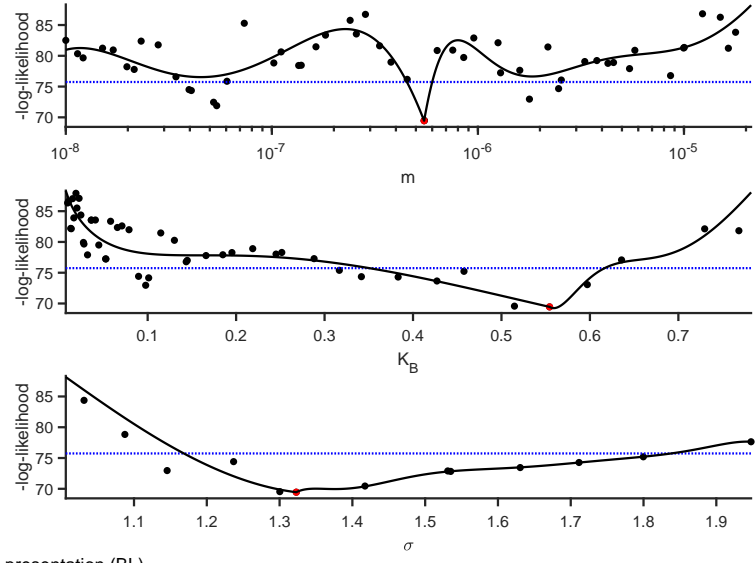

ROo13: Increased antigen presentation (BL)

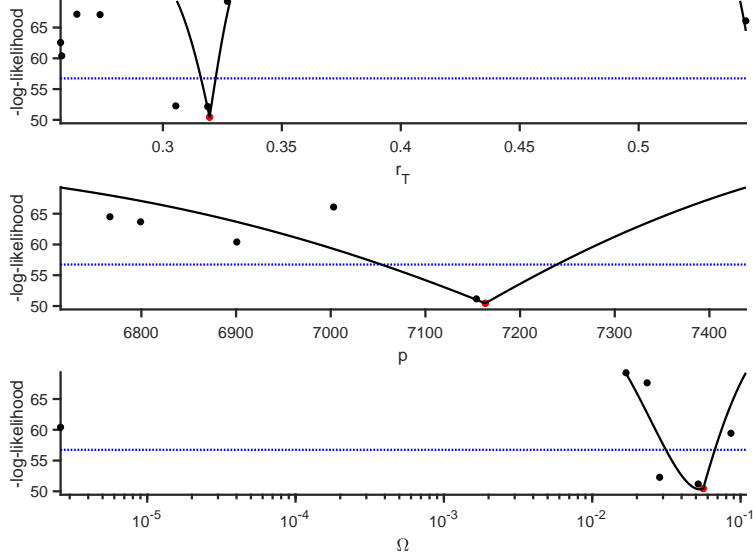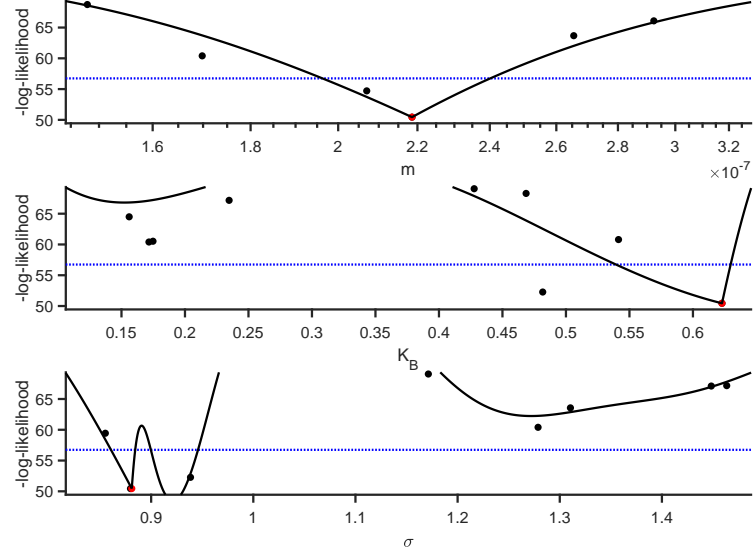

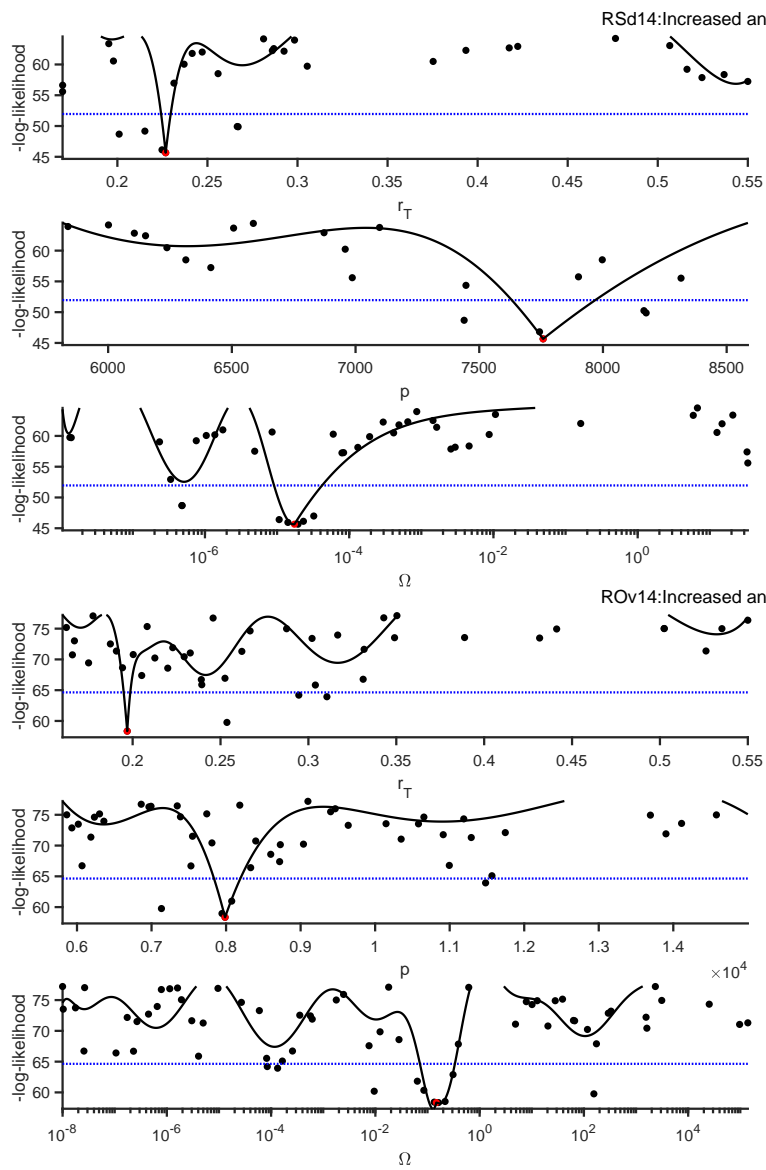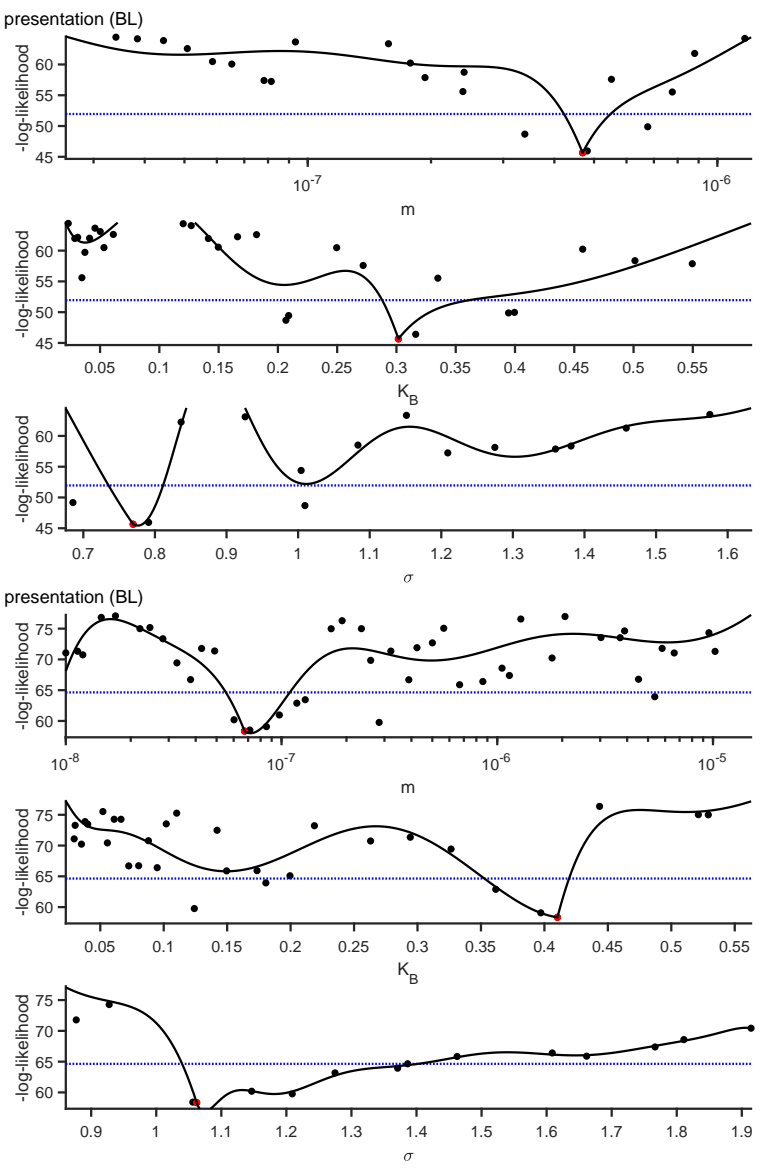

## 9.2 Saturated effector cell source model

ROq14: Increased antigen presentation (SS)

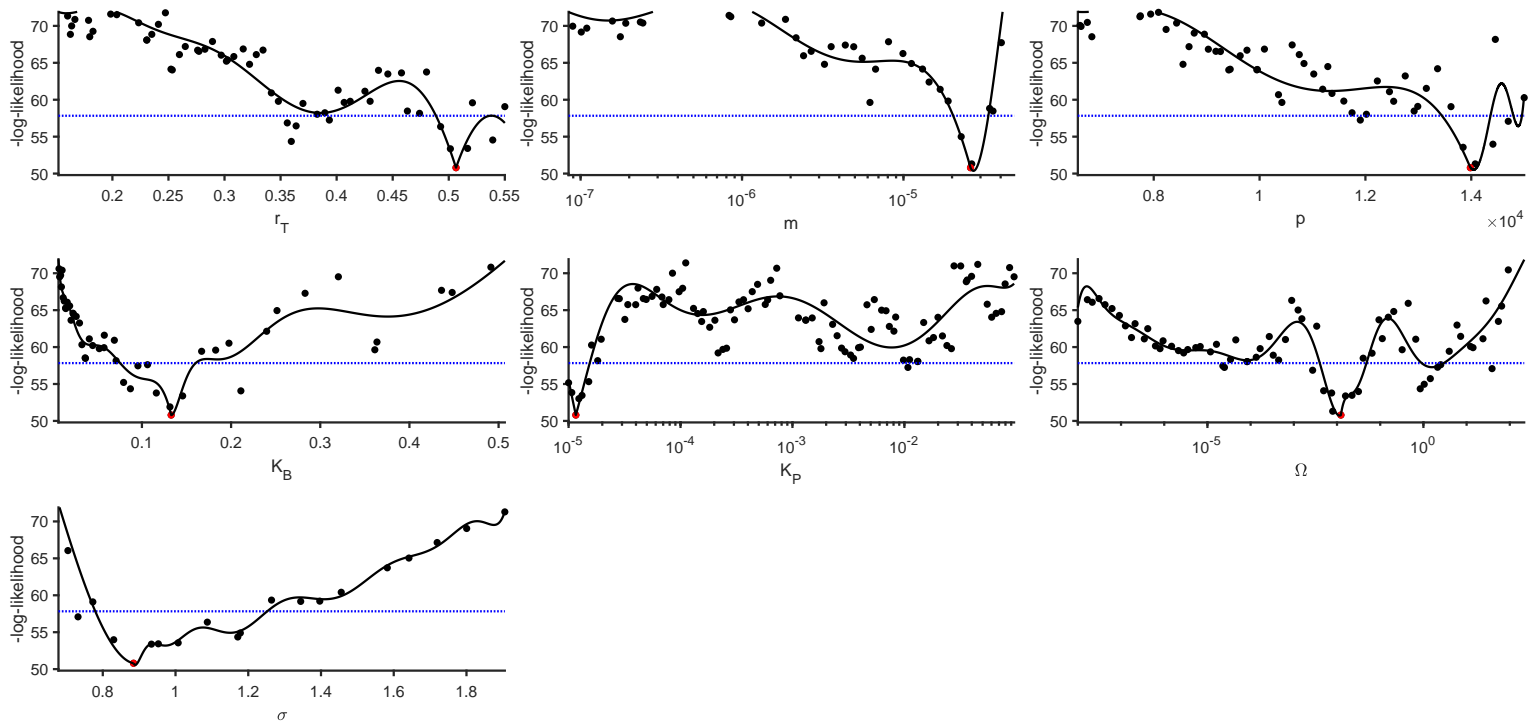



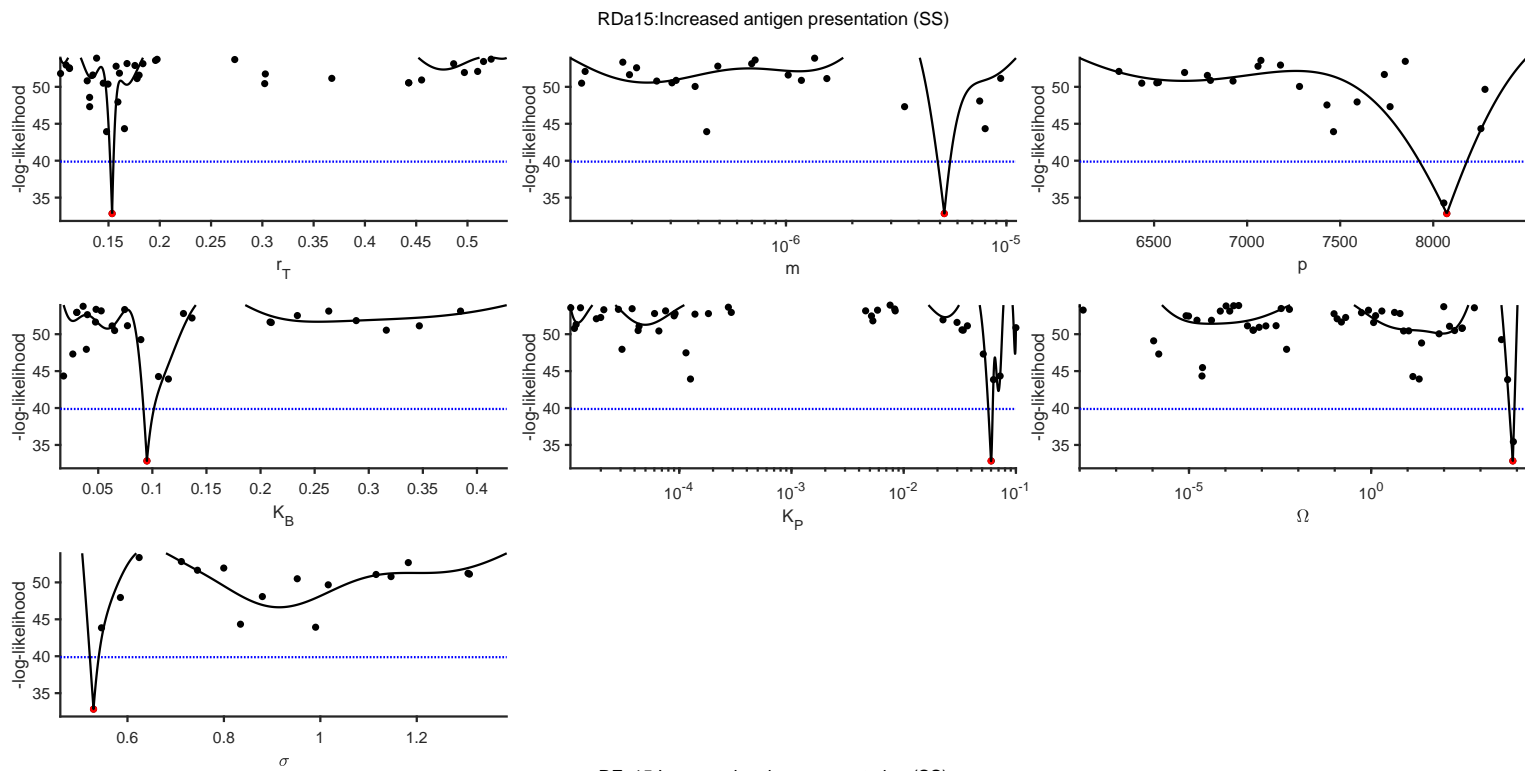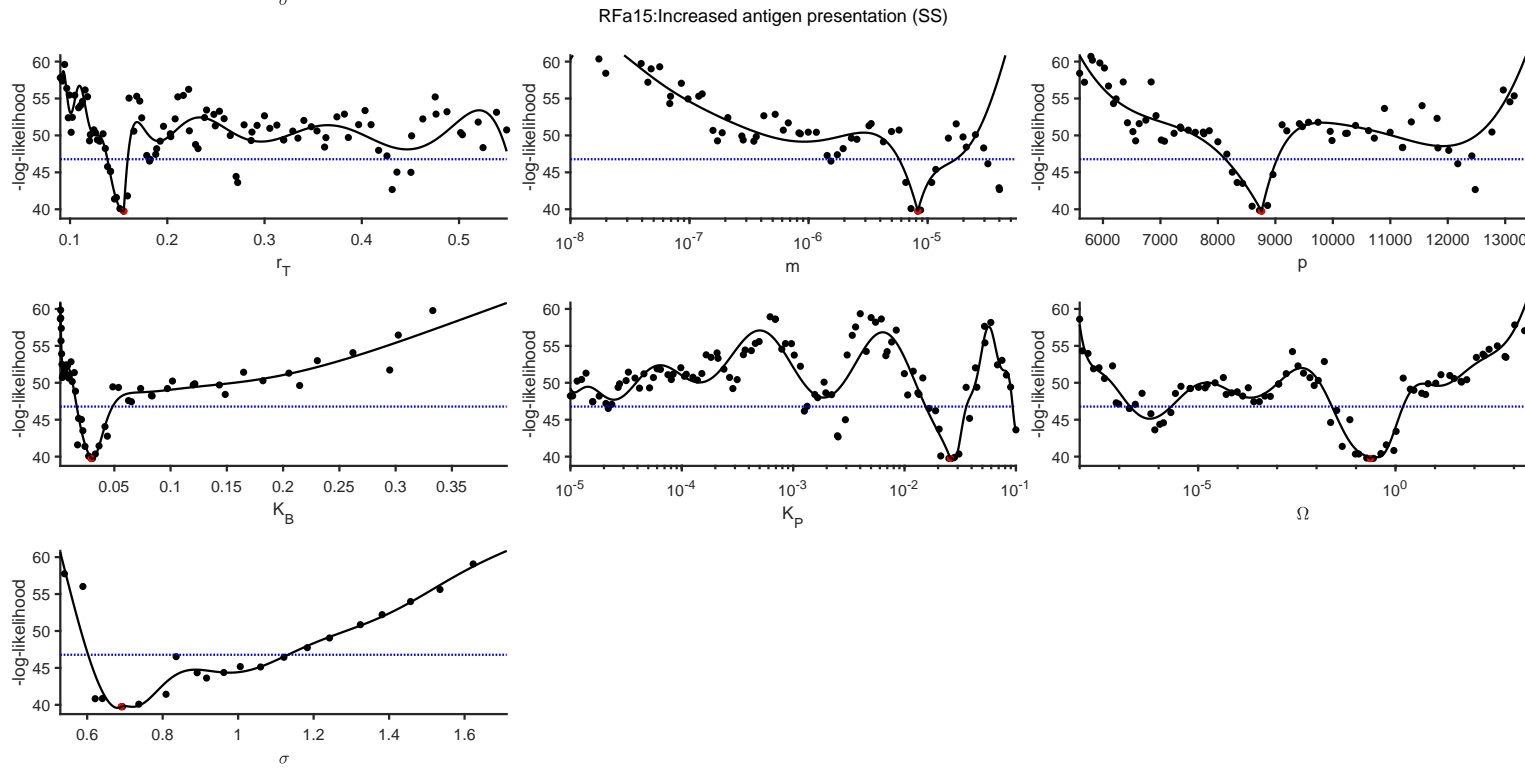

RLn12:Increased antigen presentation (SS)

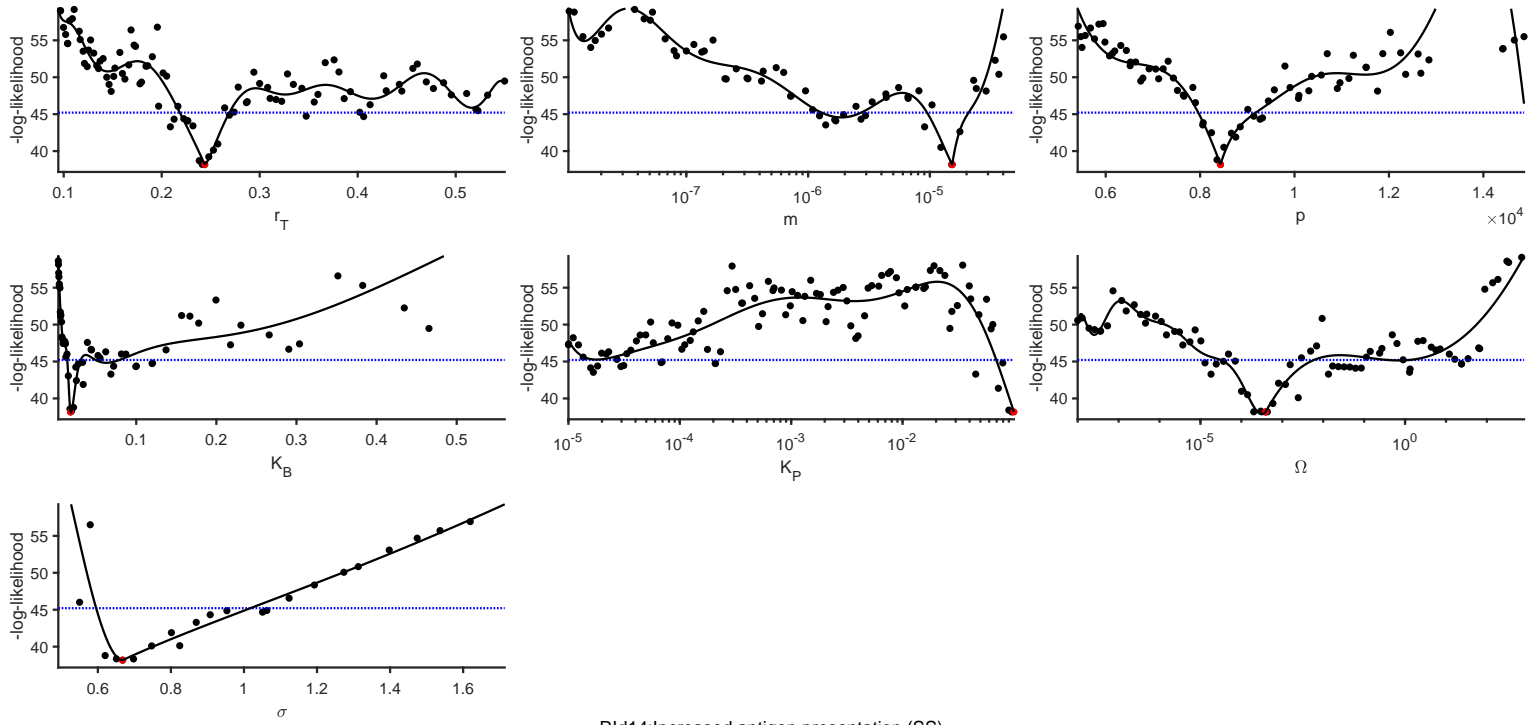

Rld14:Increased antigen presentation (SS)

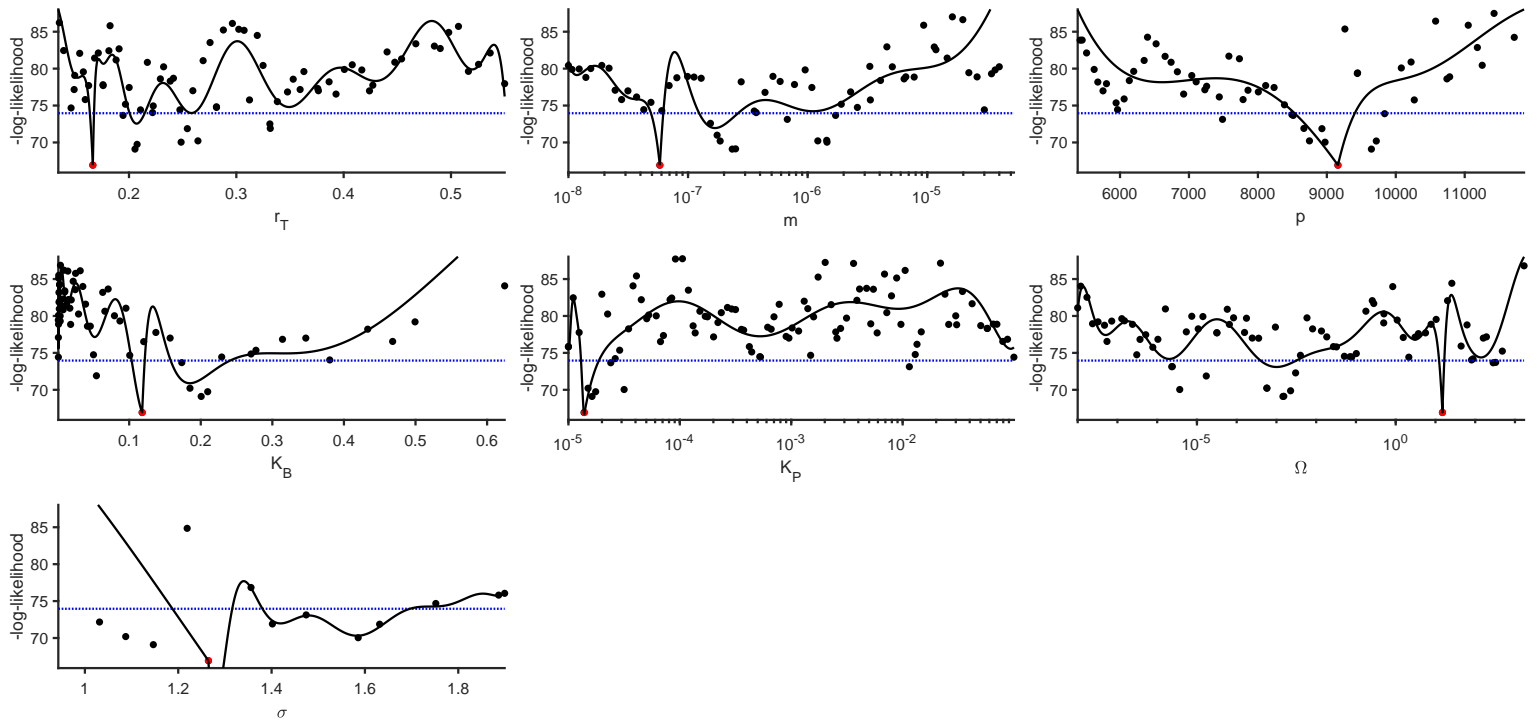

ROo13: Increased antigen presentation (SS)

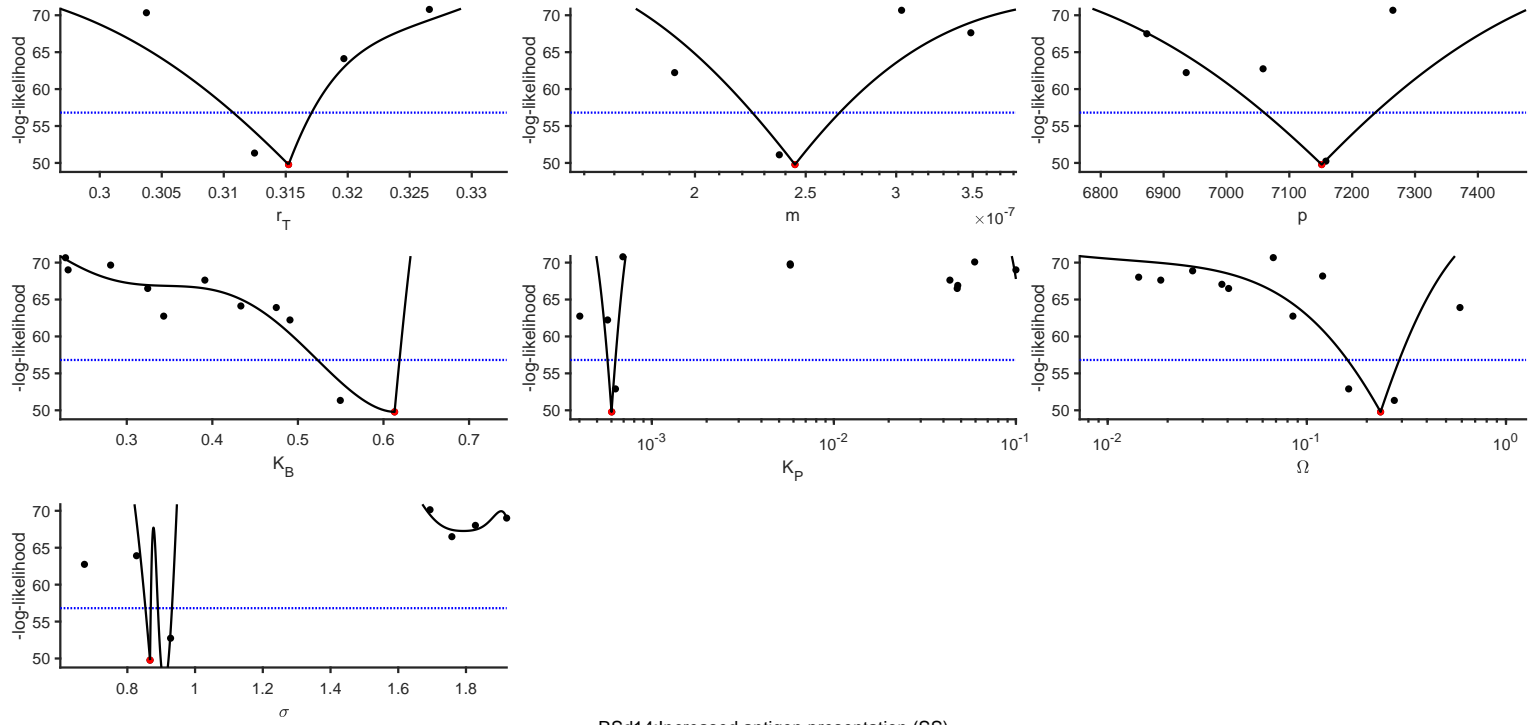

RSd14: Increased antigen presentation (SS)

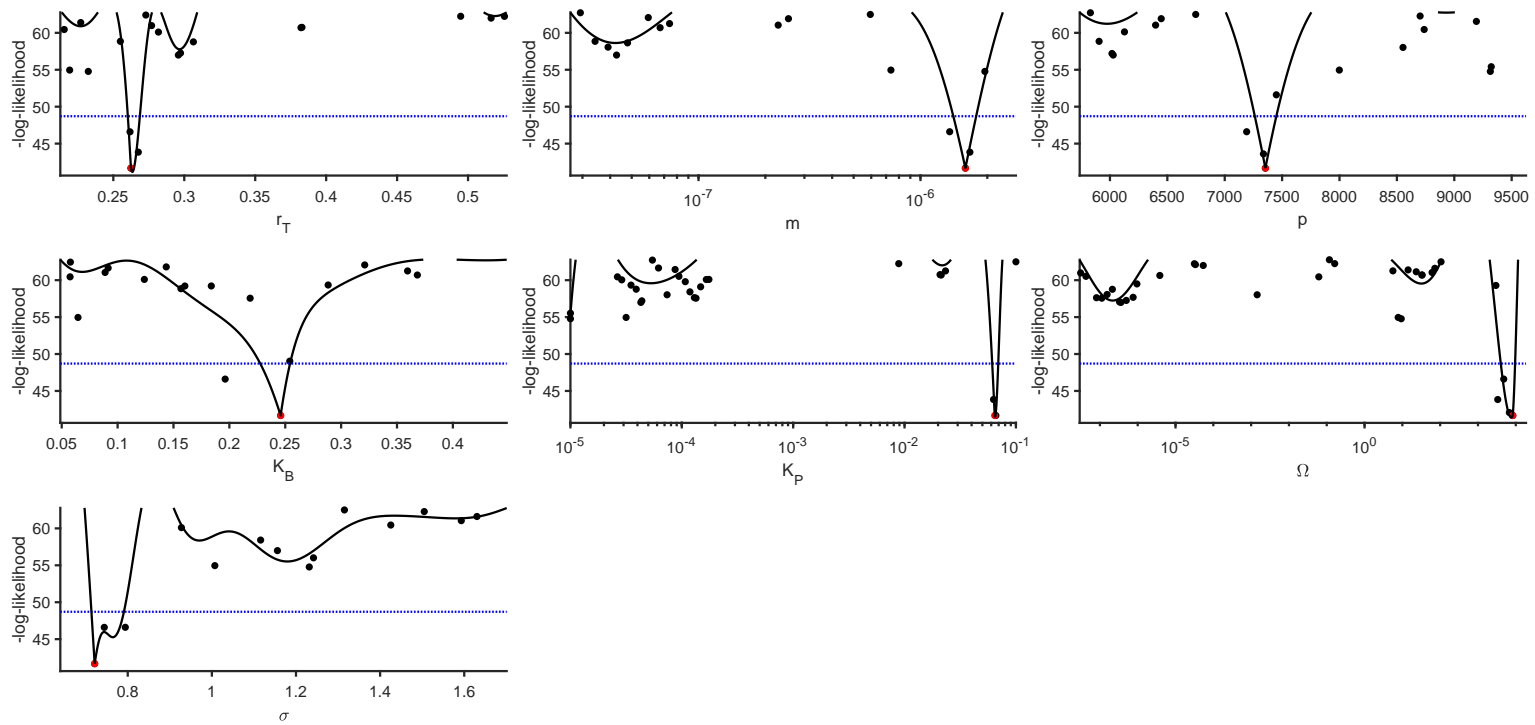

ROv14: Increased antigen presentation (SS)

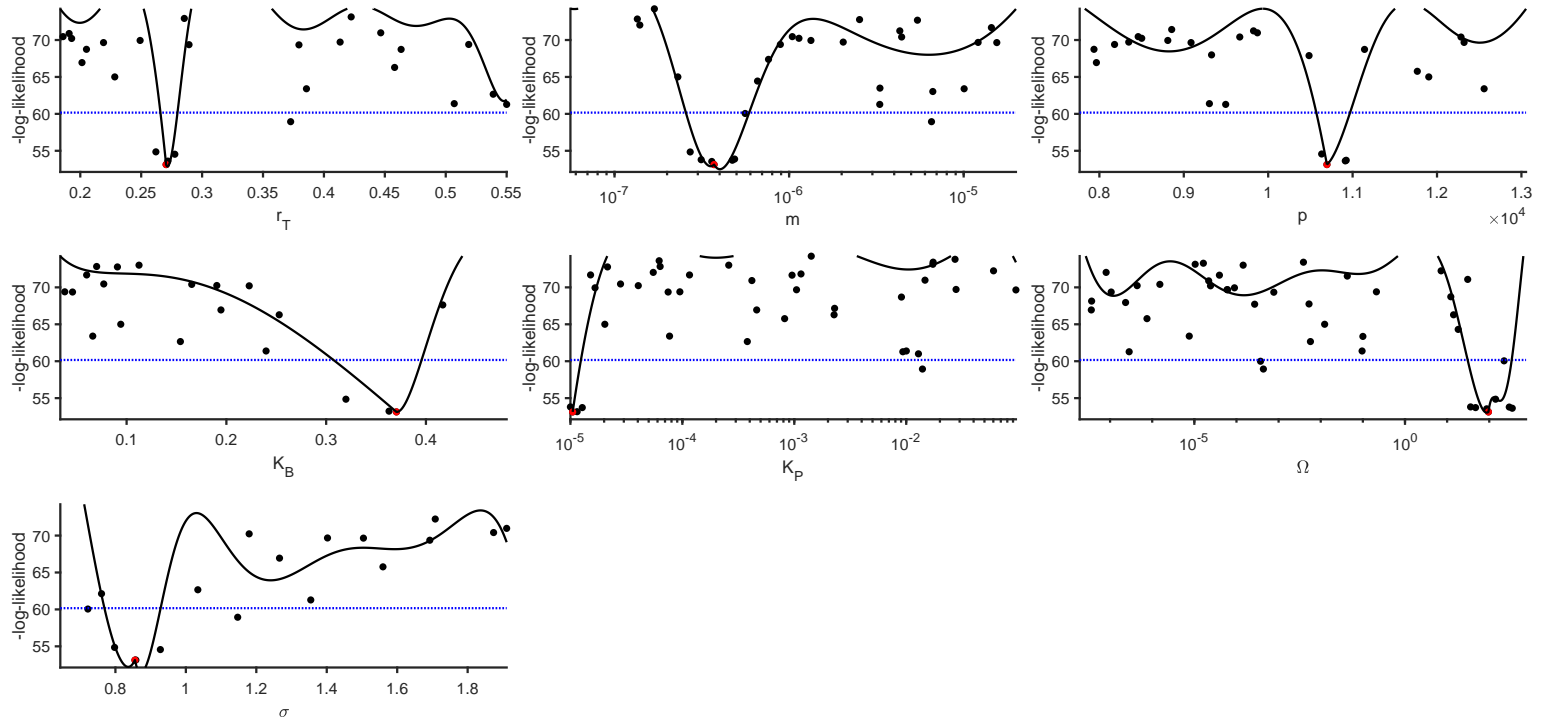

### 9.3 Antigen presenting cell effector cell source model

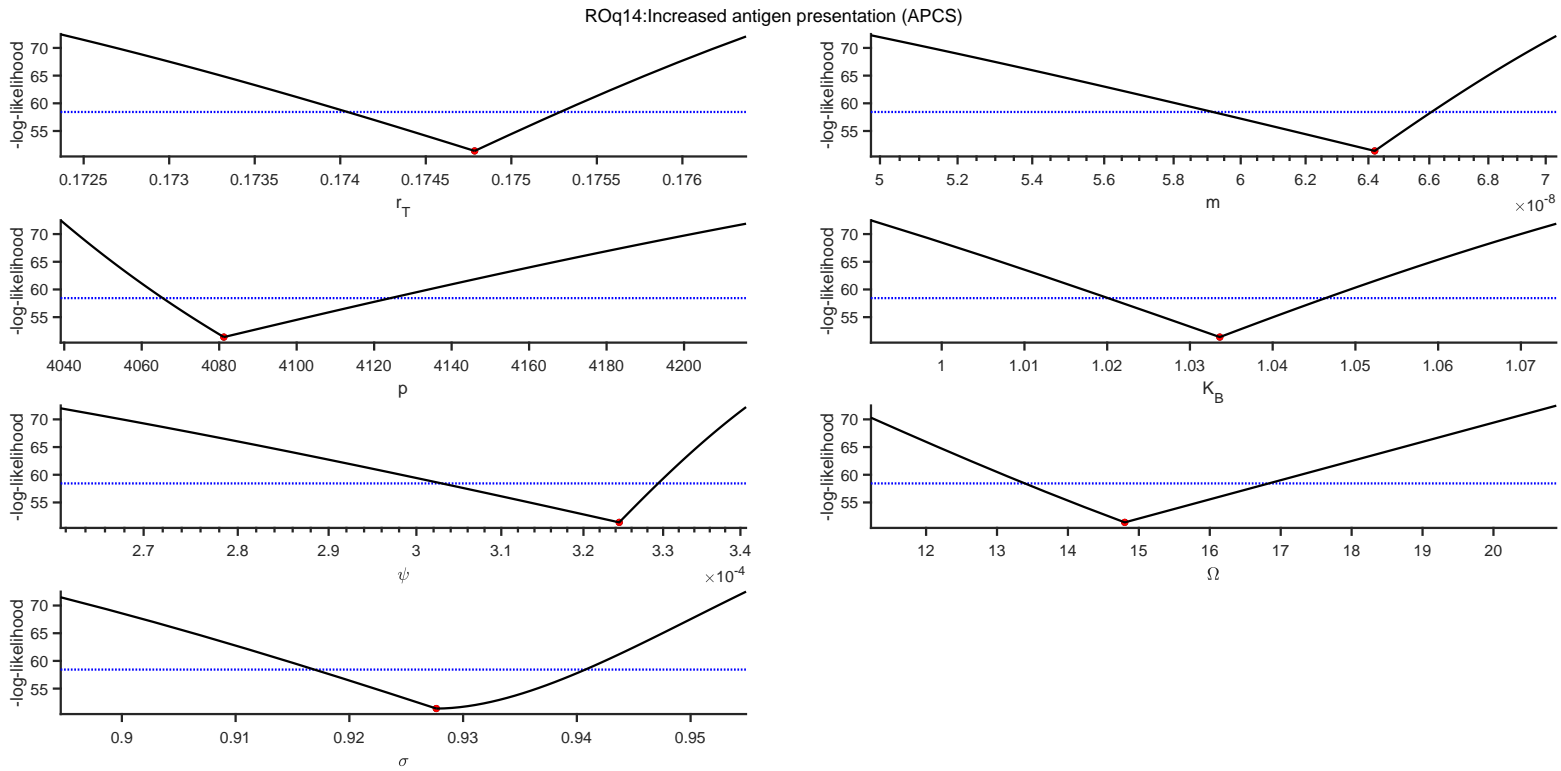

RDa15:Increased antigen presentation (APCS)

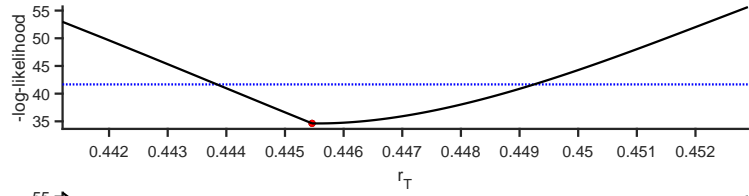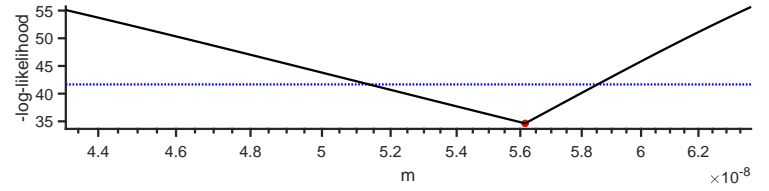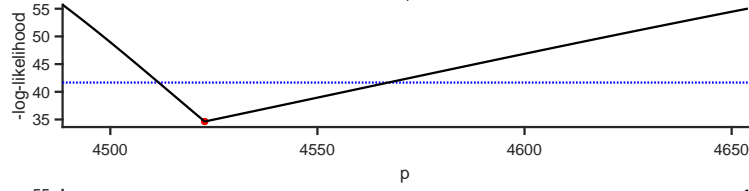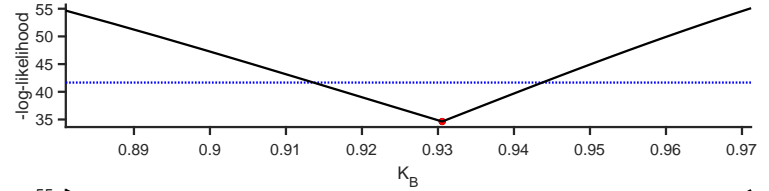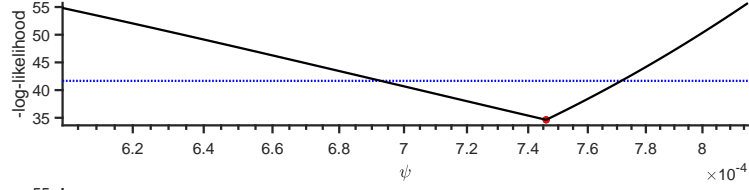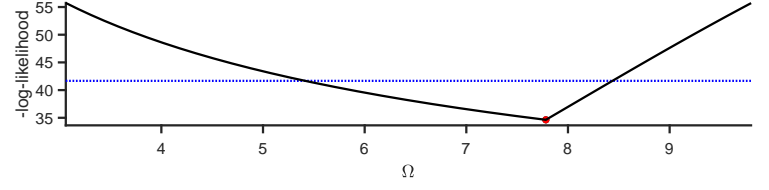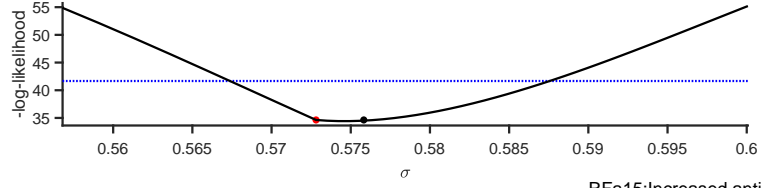

RFa15:Increased antigen presentation (APCS)

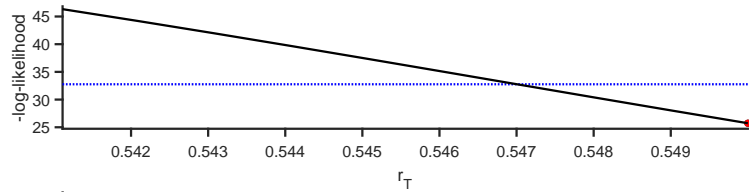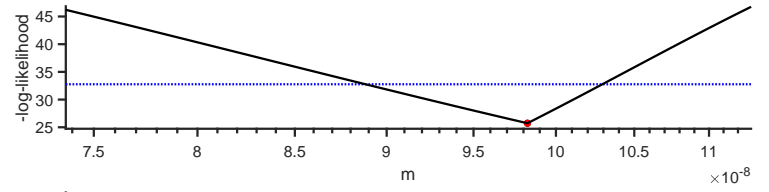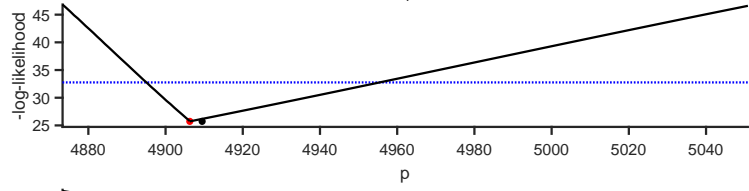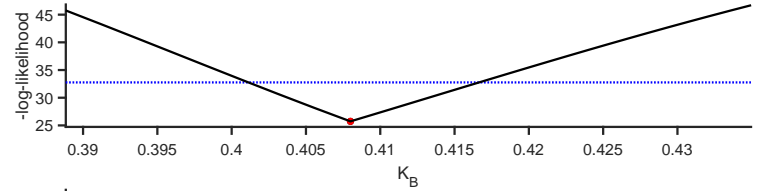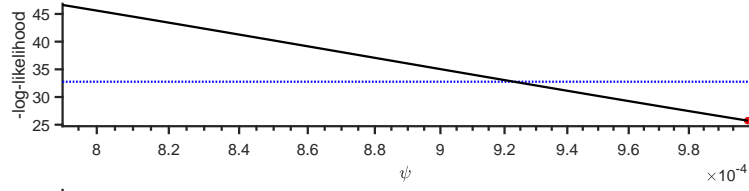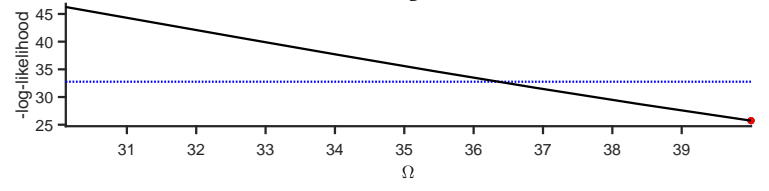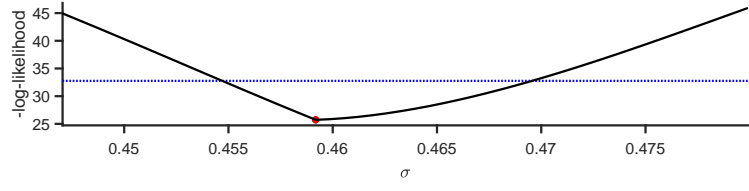

RLn12: Increased antigen presentation (APCS)

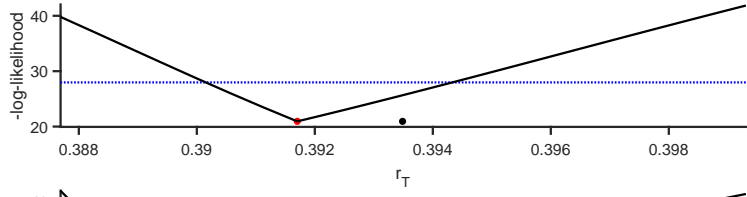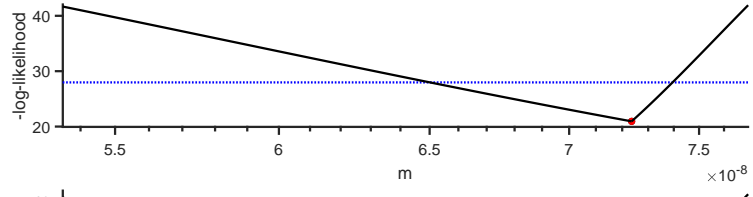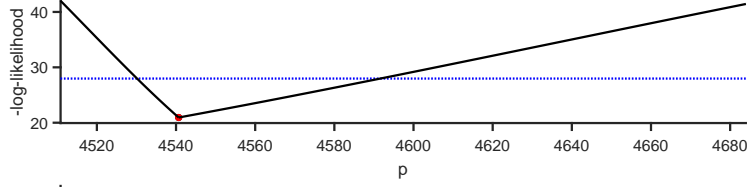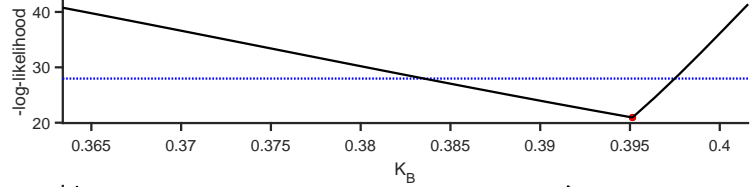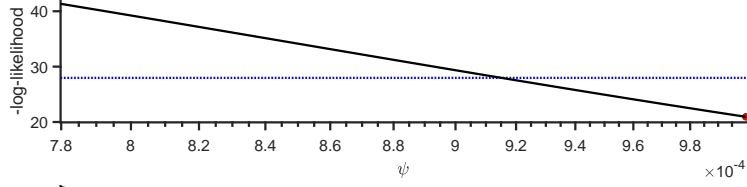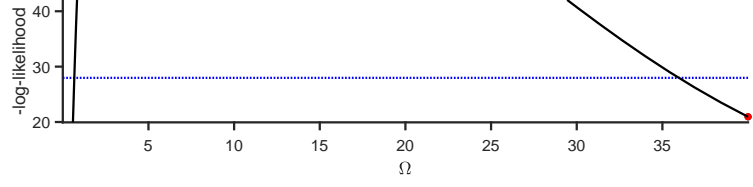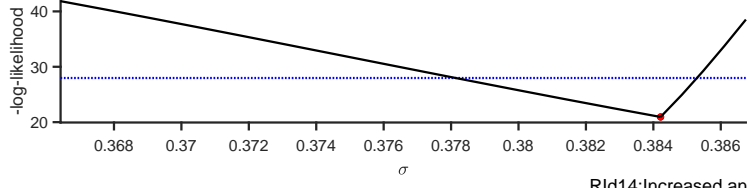

Rld14: Increased antigen presentation (APCS)

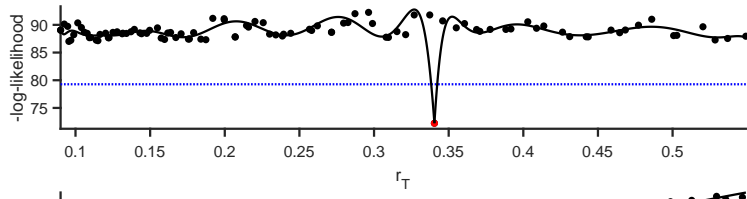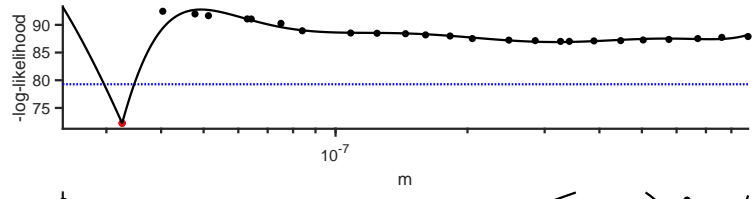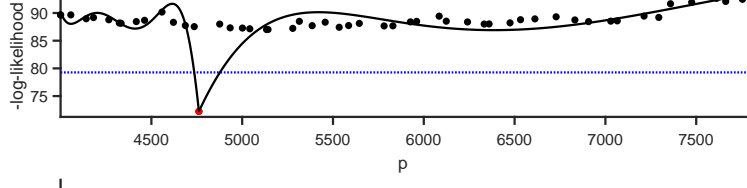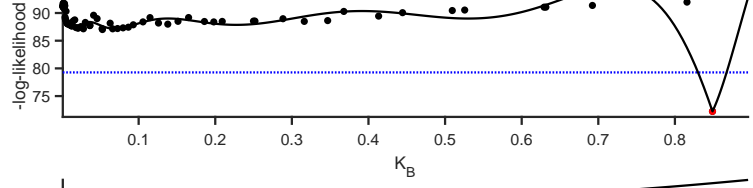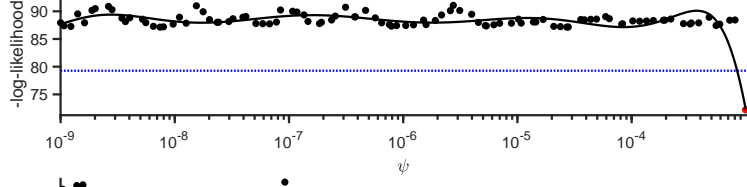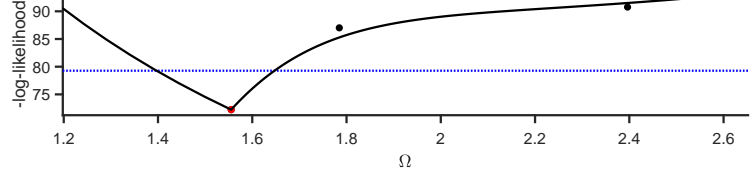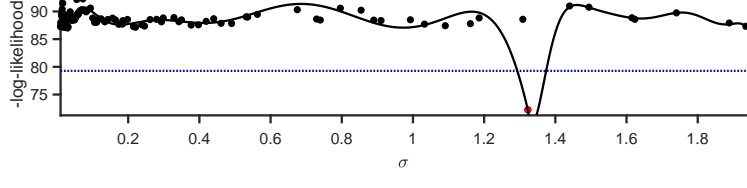

ROo13:Increased antigen presentation (APCS)

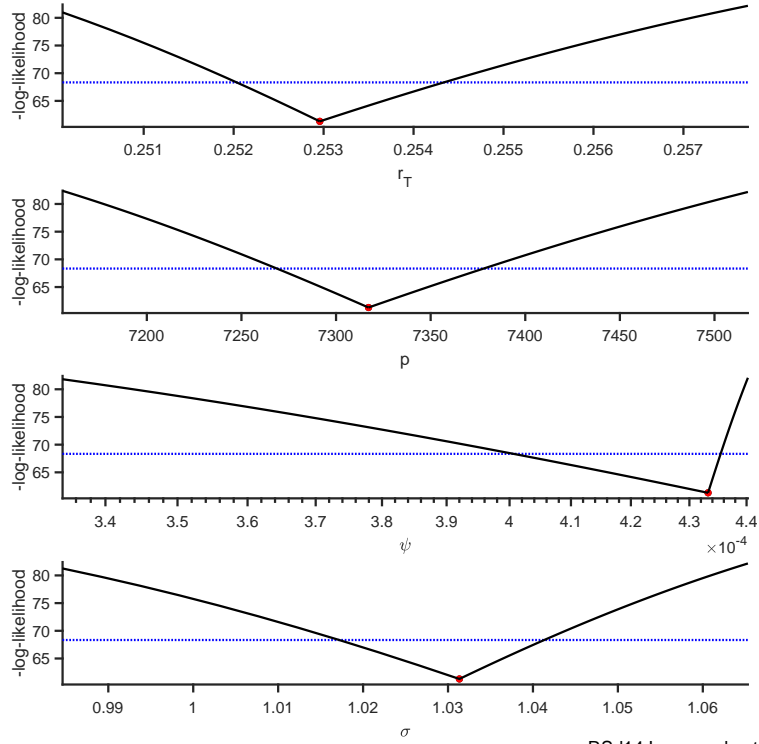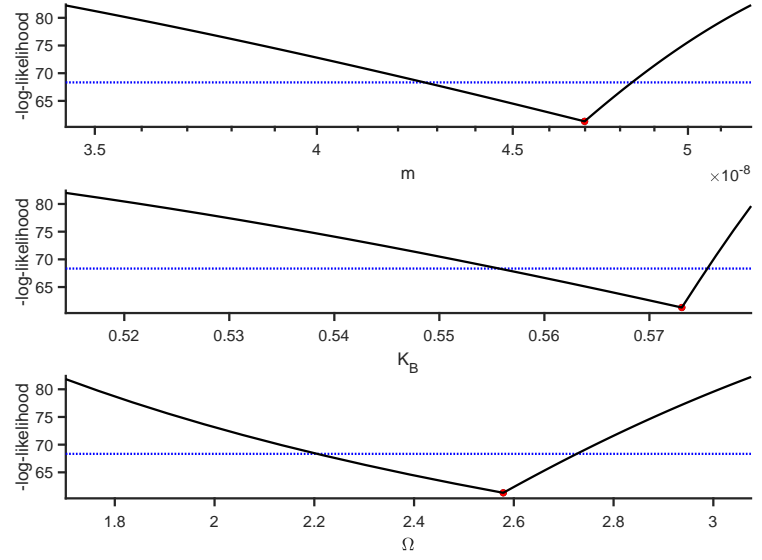

RSd14:Increased antigen presentation (APCS)

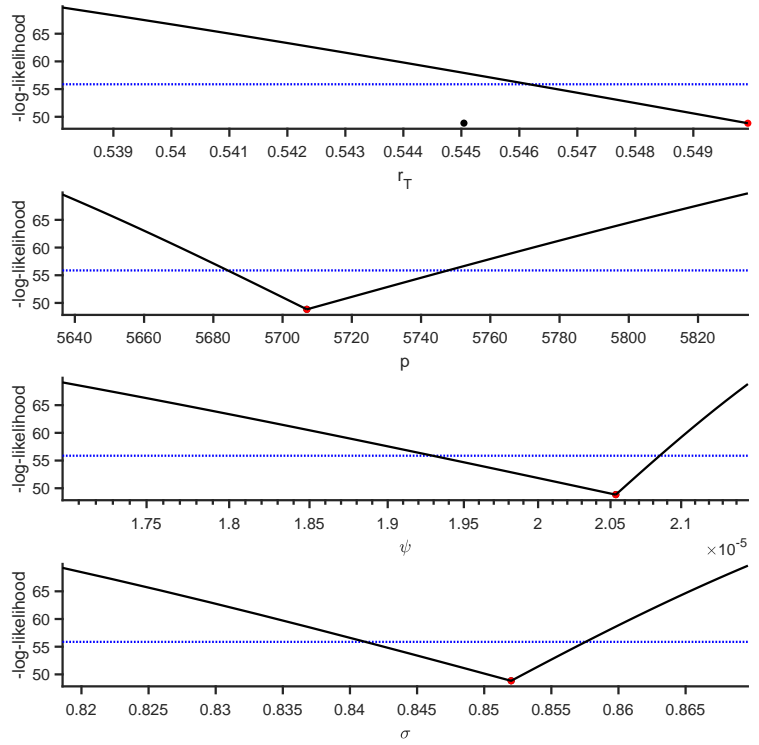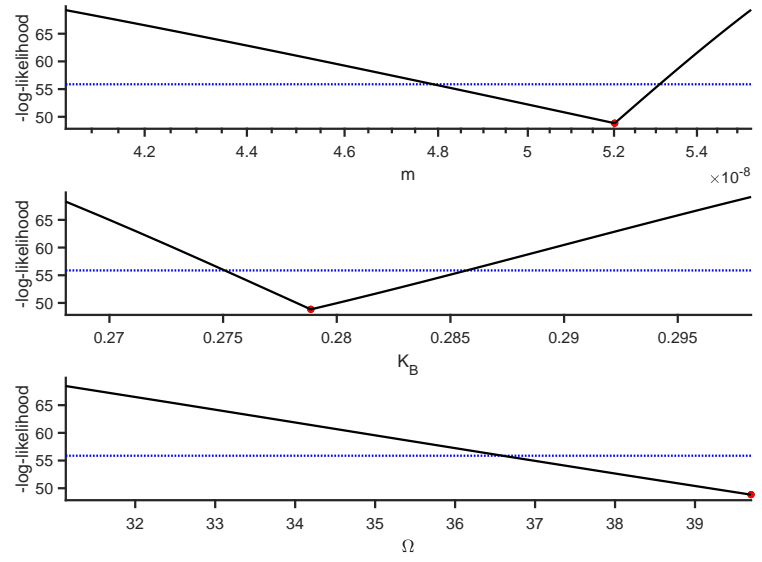



ROv14: Increased antigen presentation (APCS)

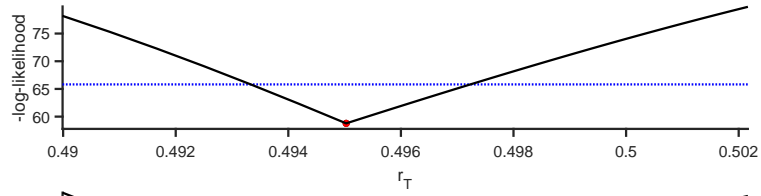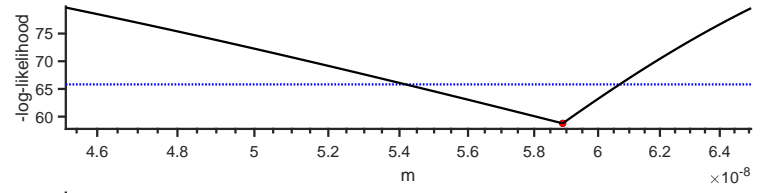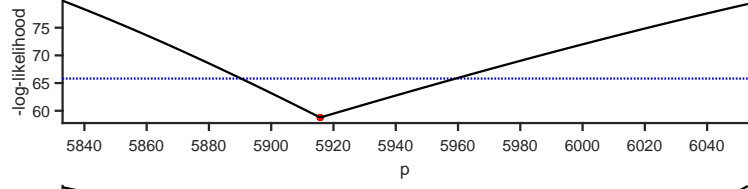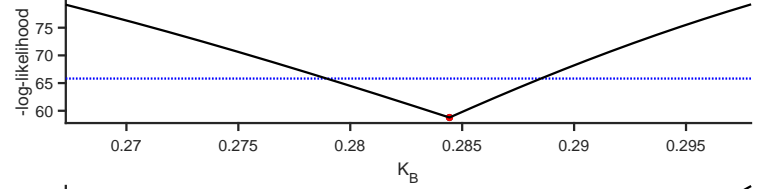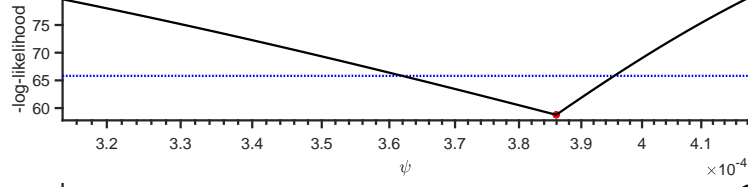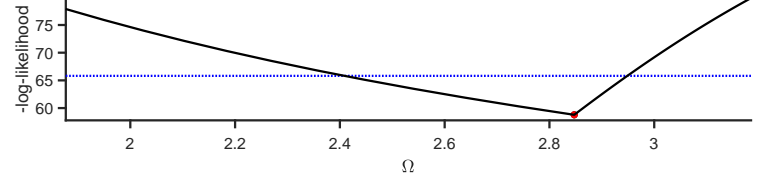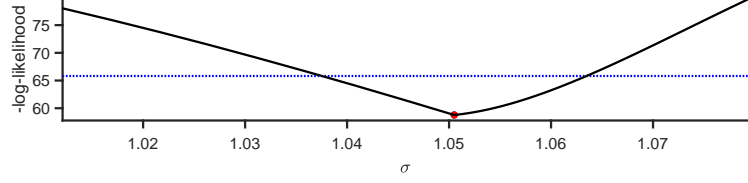

# 10 Sensitivity analysis: Increased antigen presentation

## 10.1 Baseline effector cell source model

ROq14:Increased antigen presentation (BL)

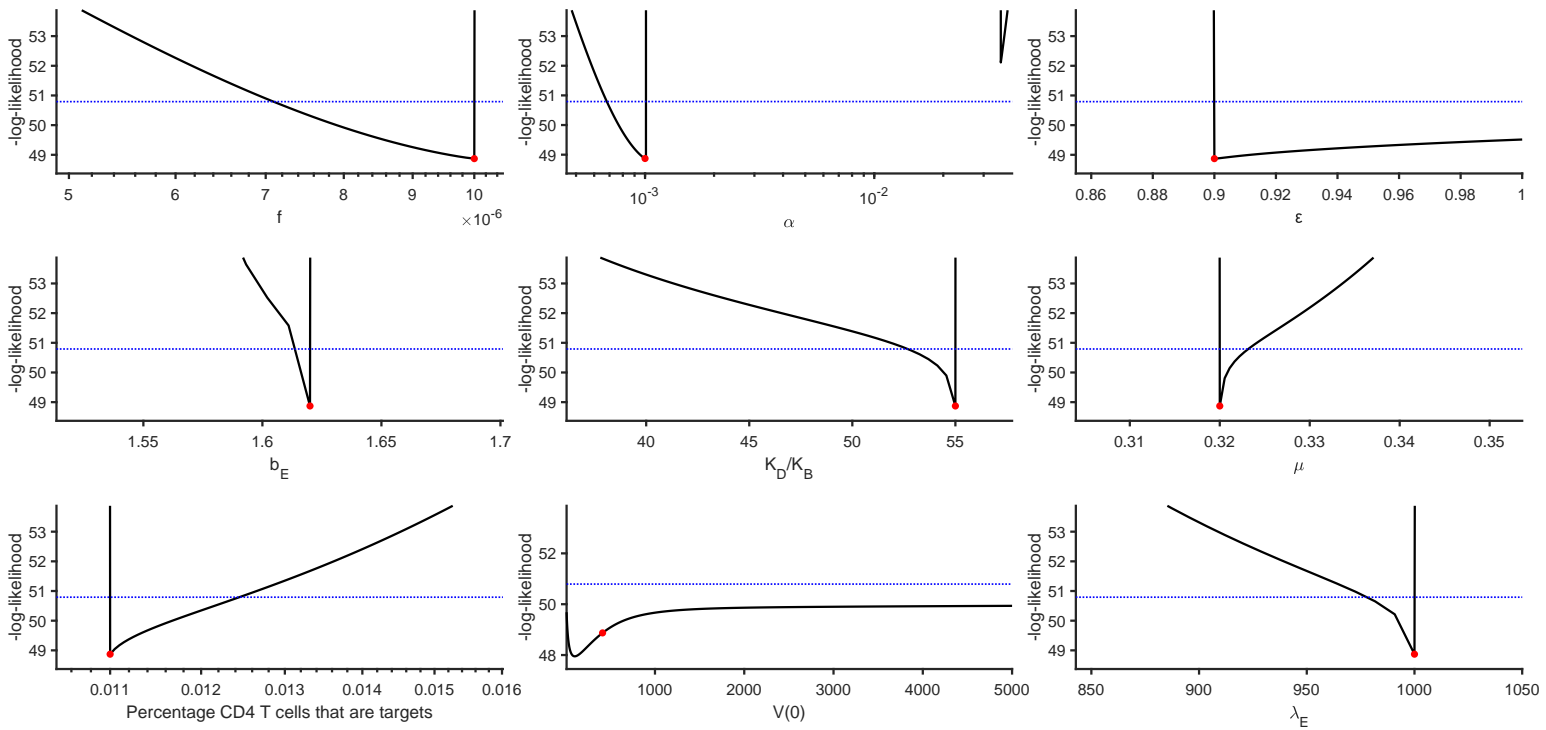

RDa15: Increased antigen presentation (BL)

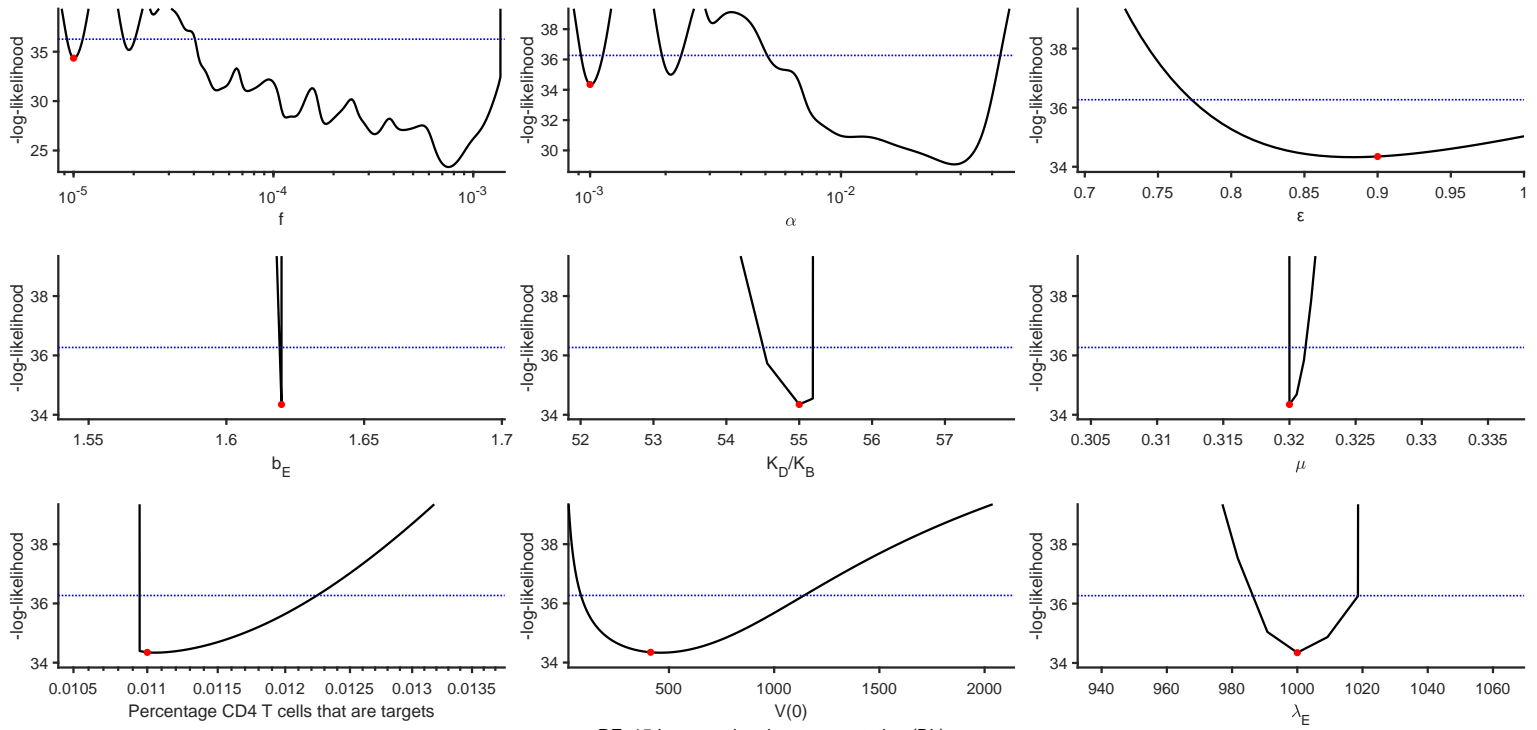

RFa15: Increased antigen presentation (BL)

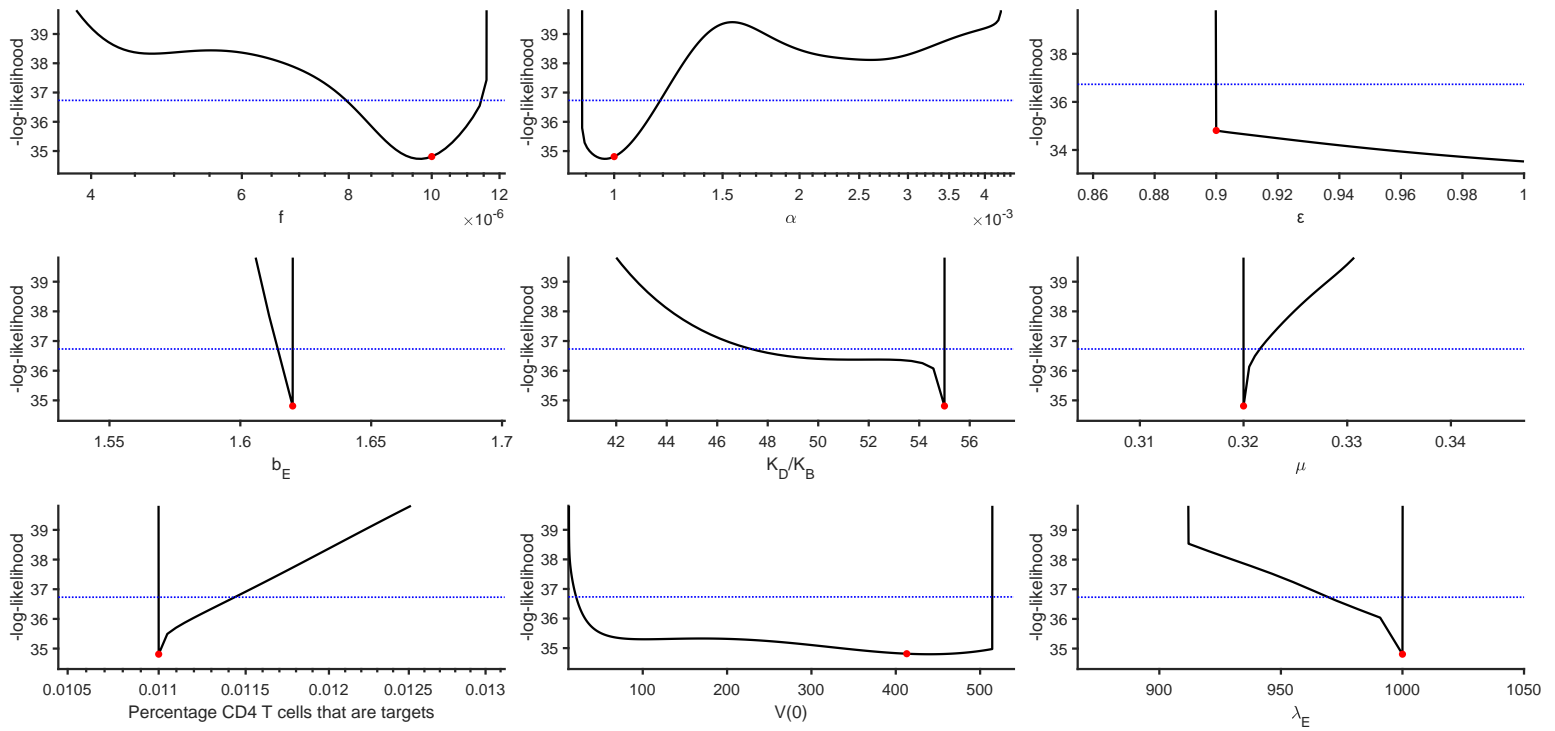

RLn12: Increased antigen presentation (BL)

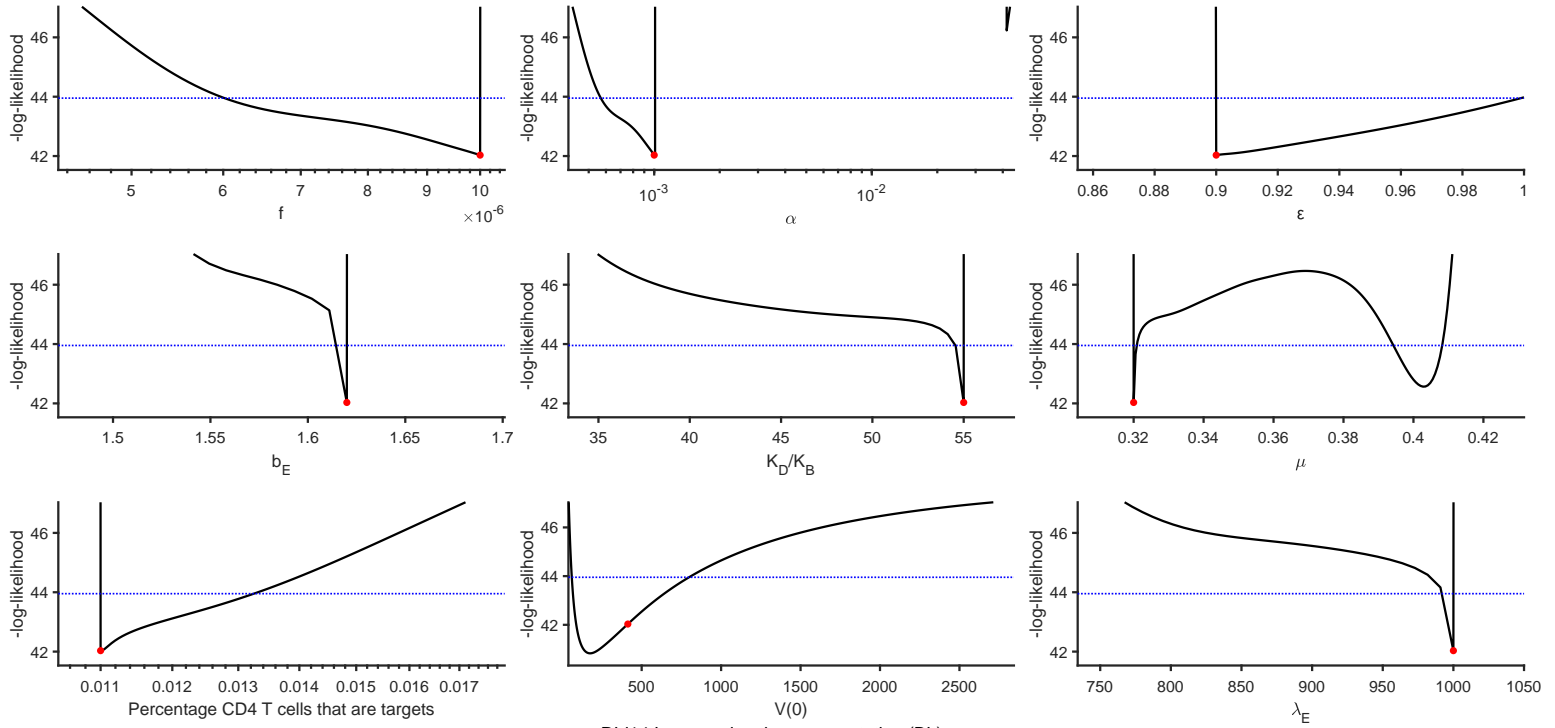

Rld14: Increased antigen presentation (BL)

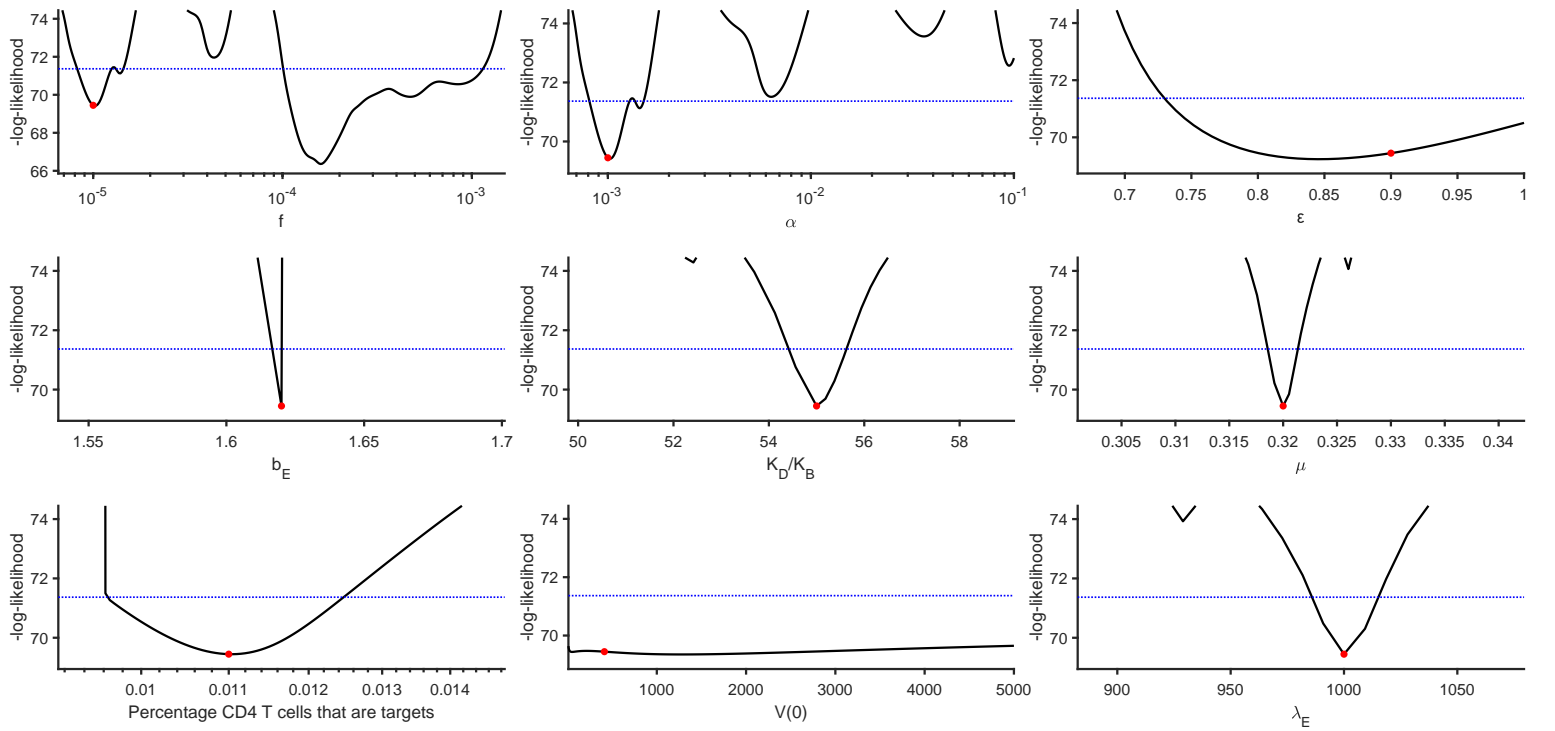

ROo13: Increased antigen presentation (BL)

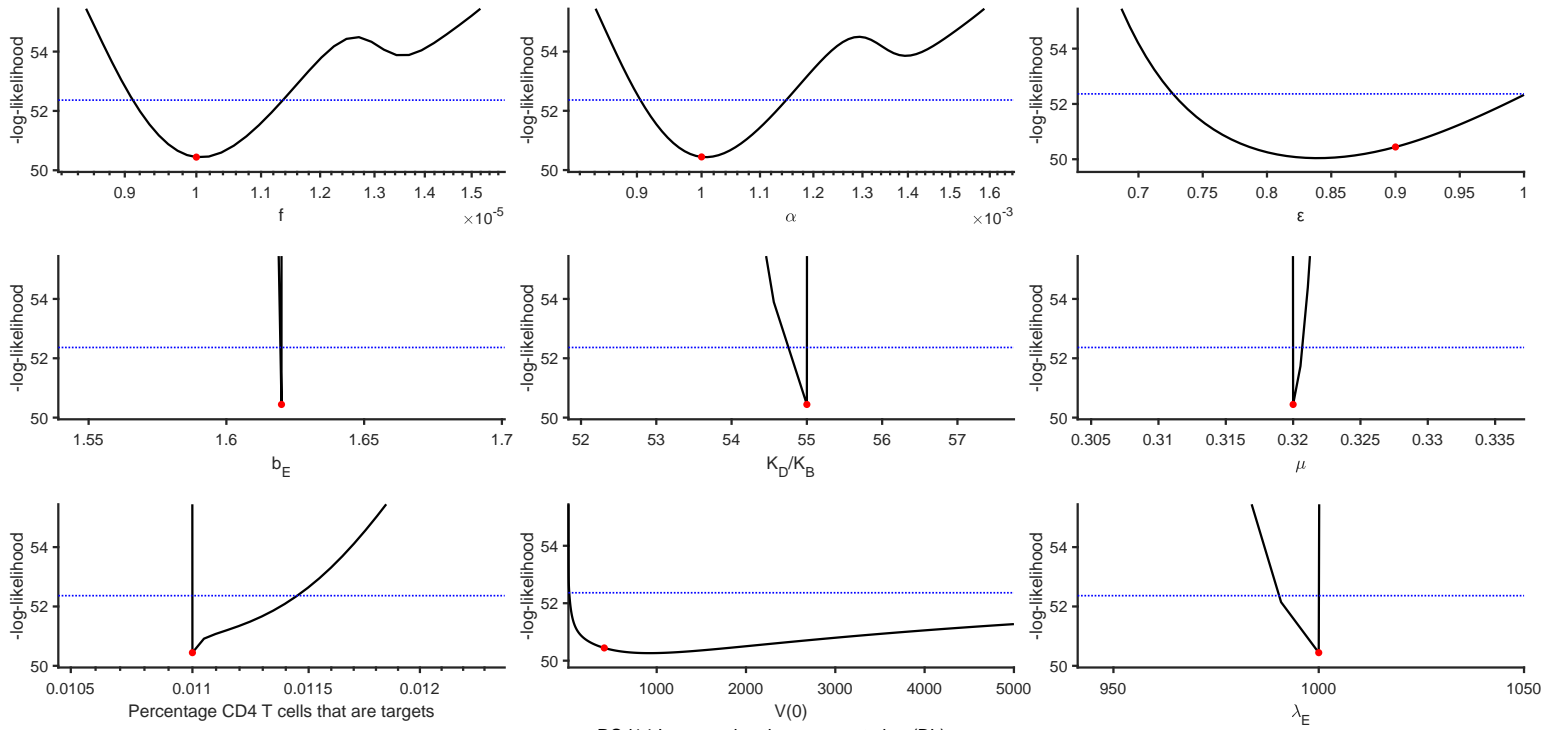

RSd14: Increased antigen presentation (BL)

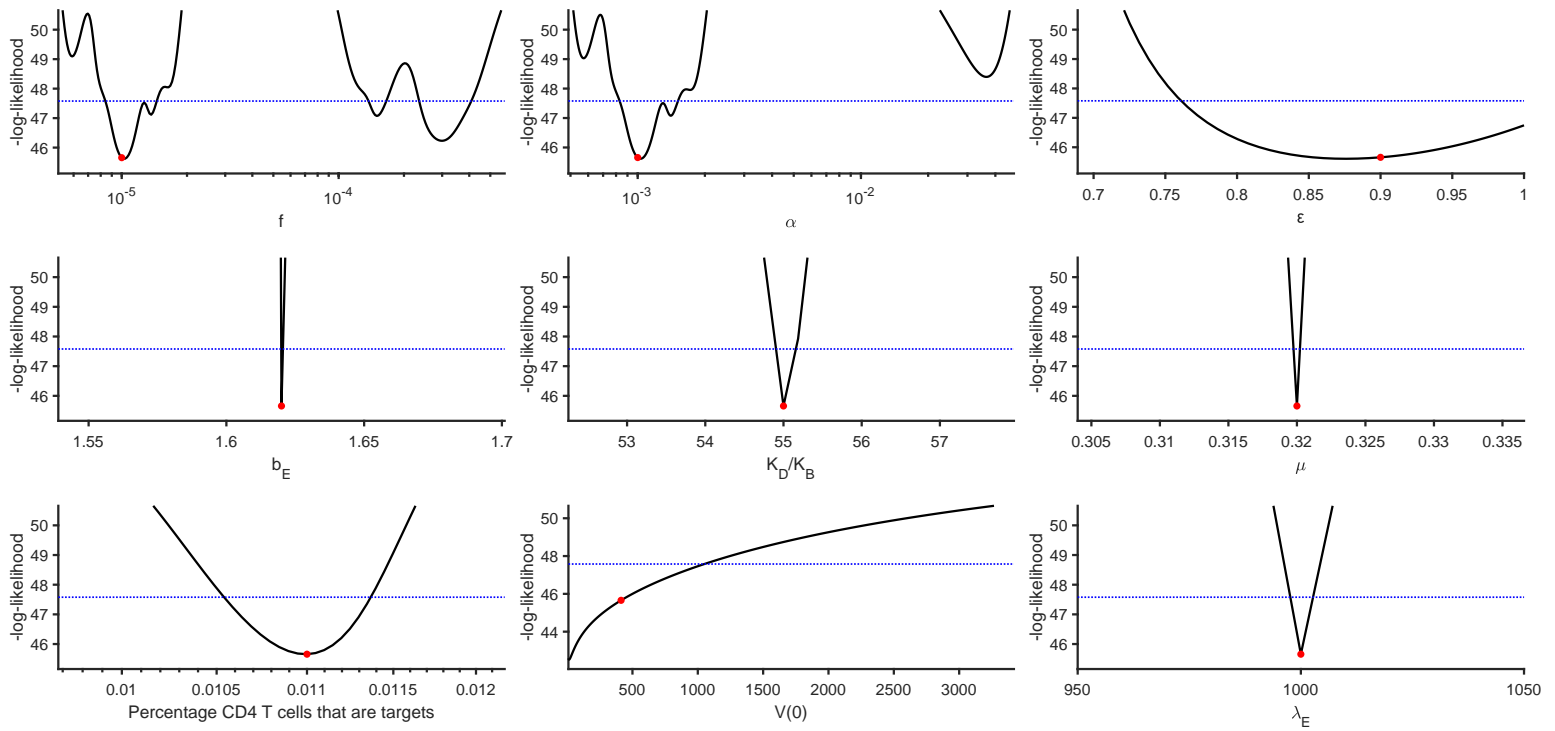

ROv14: Increased antigen presentation (BL)

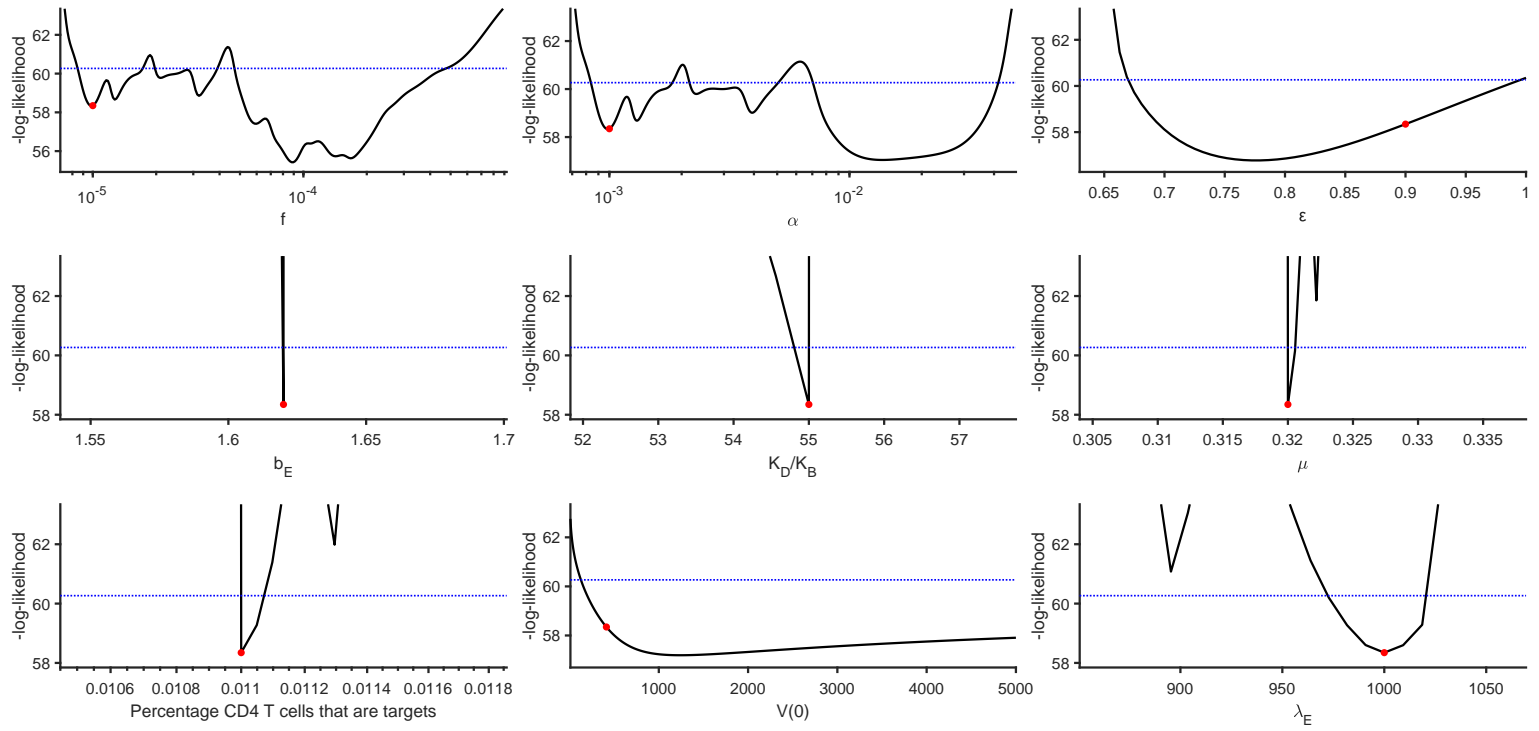

## 10.2 Saturated effector cell source model

ROq14: Increased antigen presentation (SS)

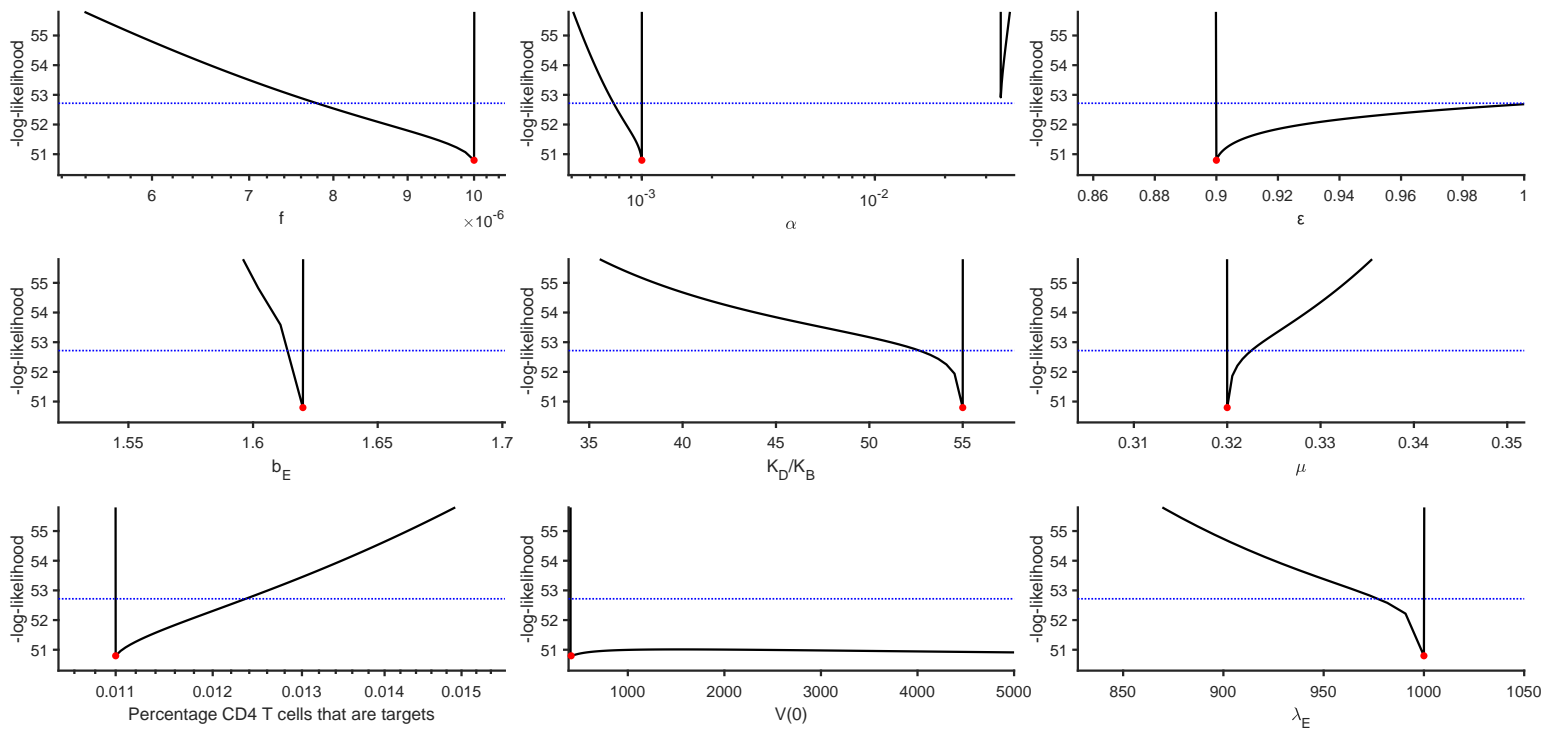

RDa15: Increased antigen presentation (SS)

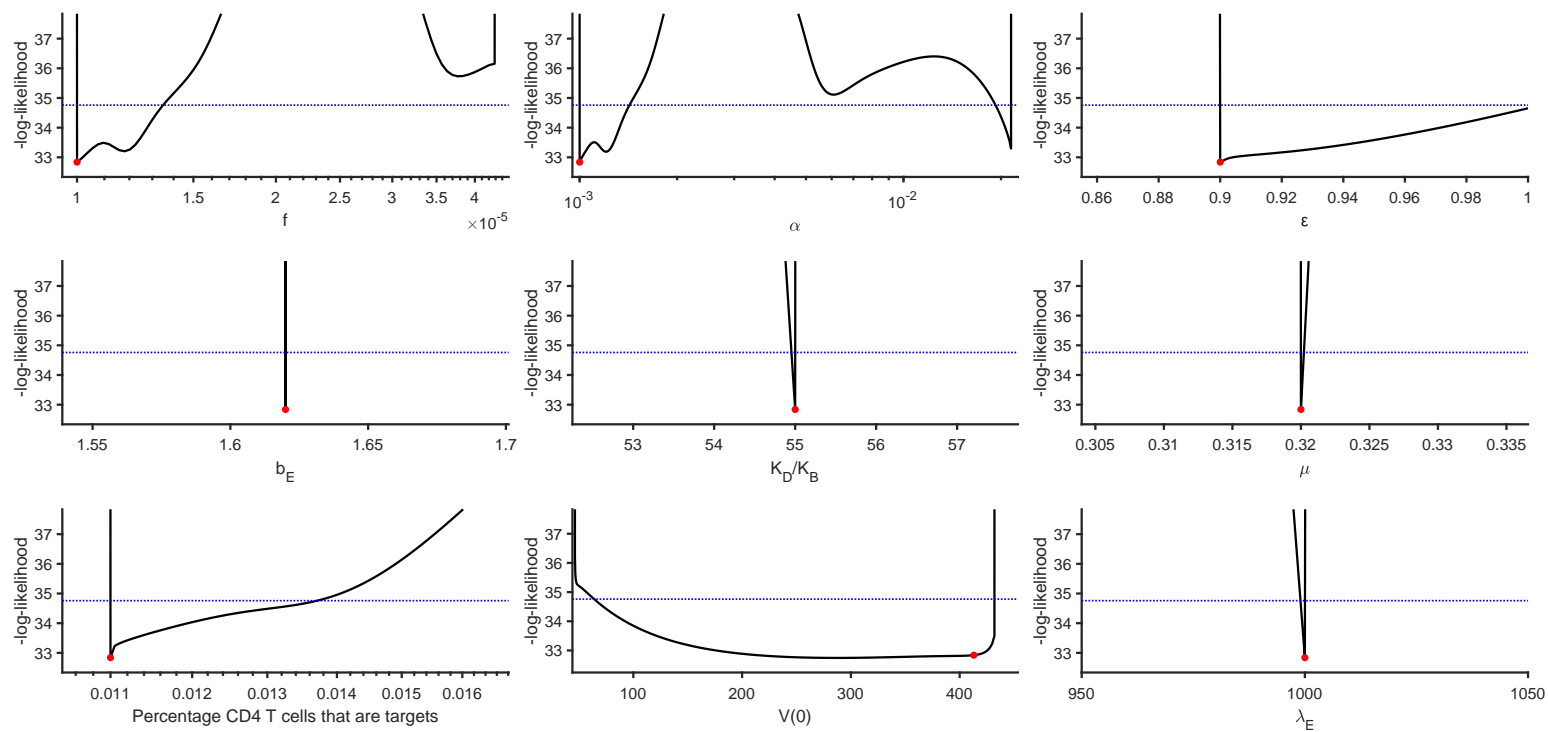

RFa15: Increased antigen presentation (SS)

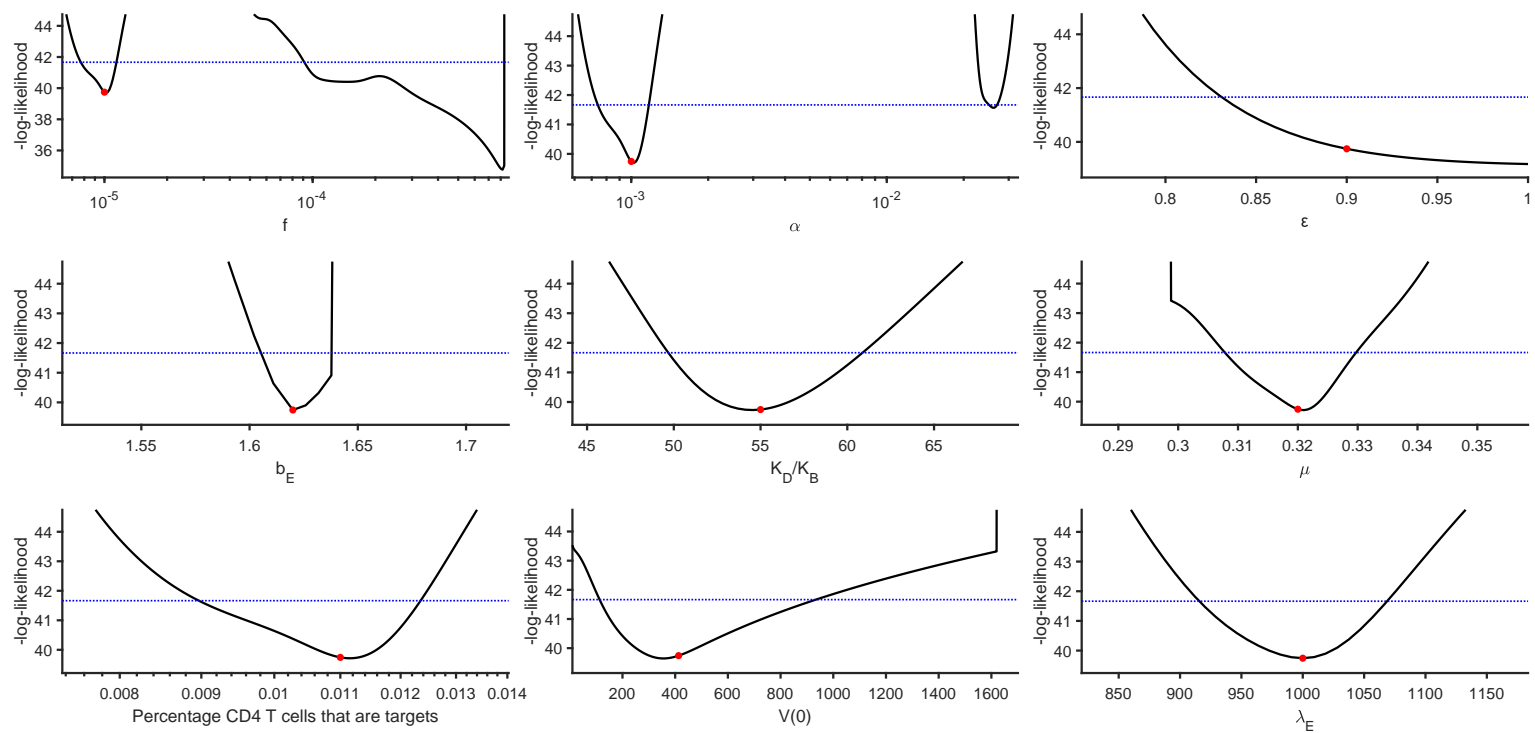



RLn12: Increased antigen presentation (SS)

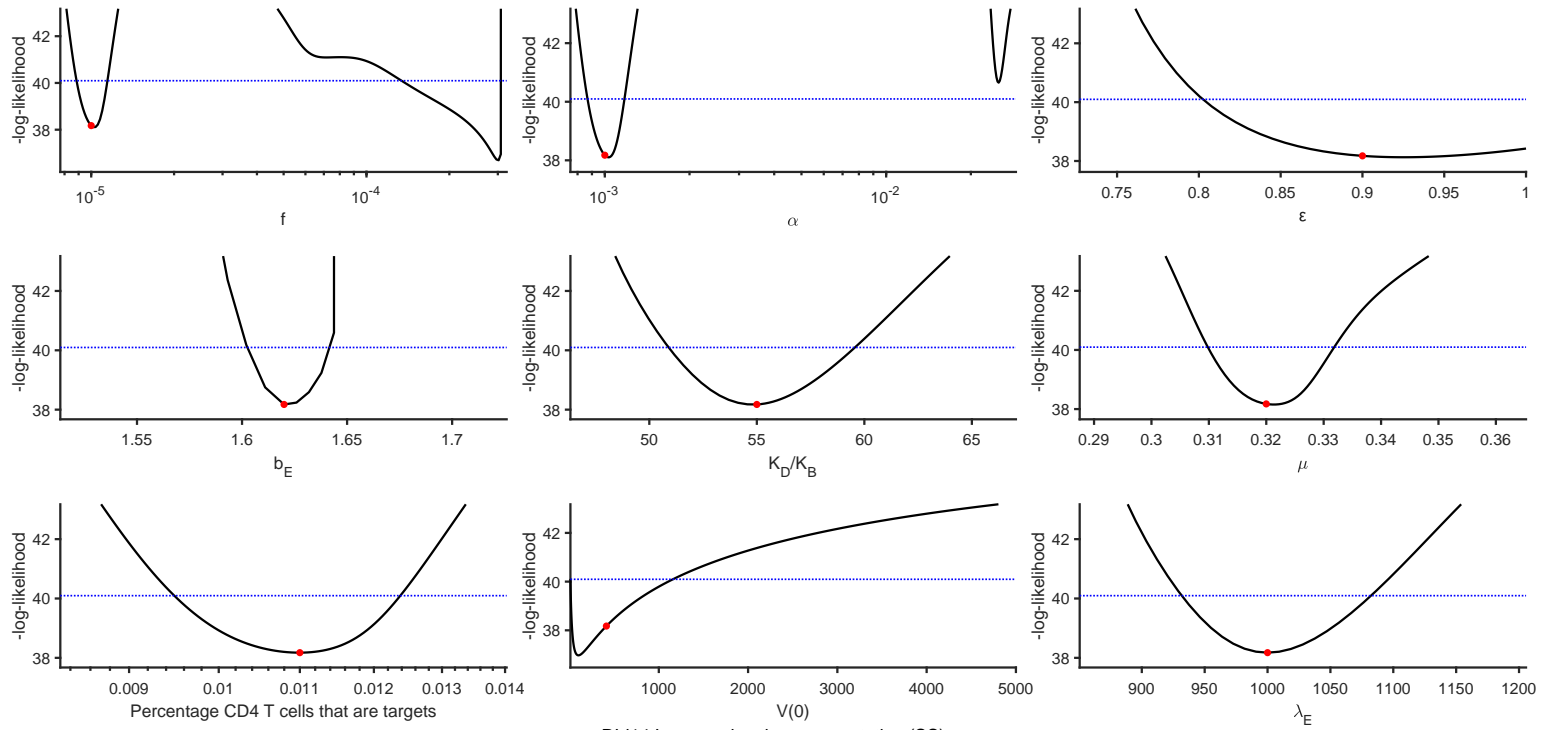

Rld14: Increased antigen presentation (SS)

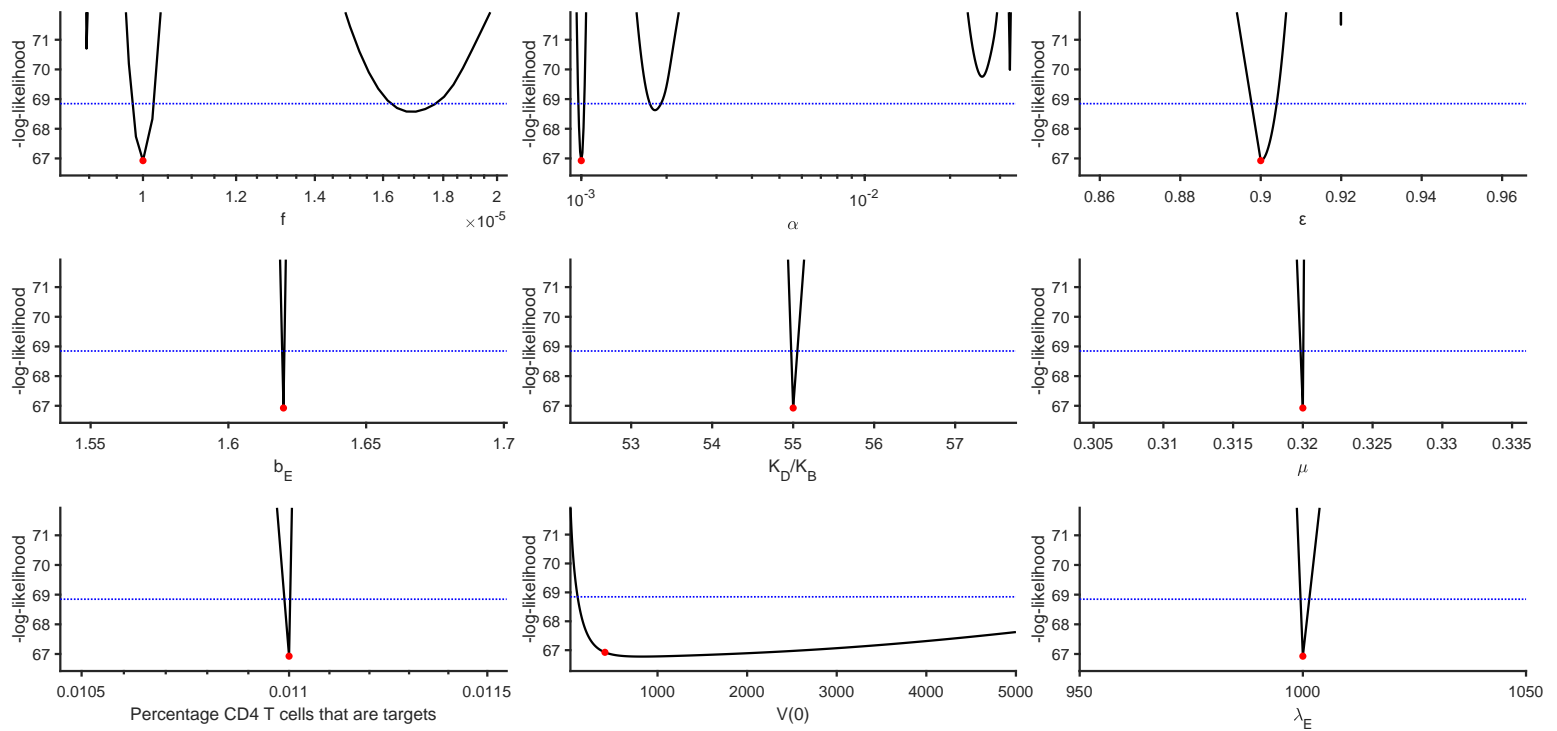

ROo13: Increased antigen presentation (SS)

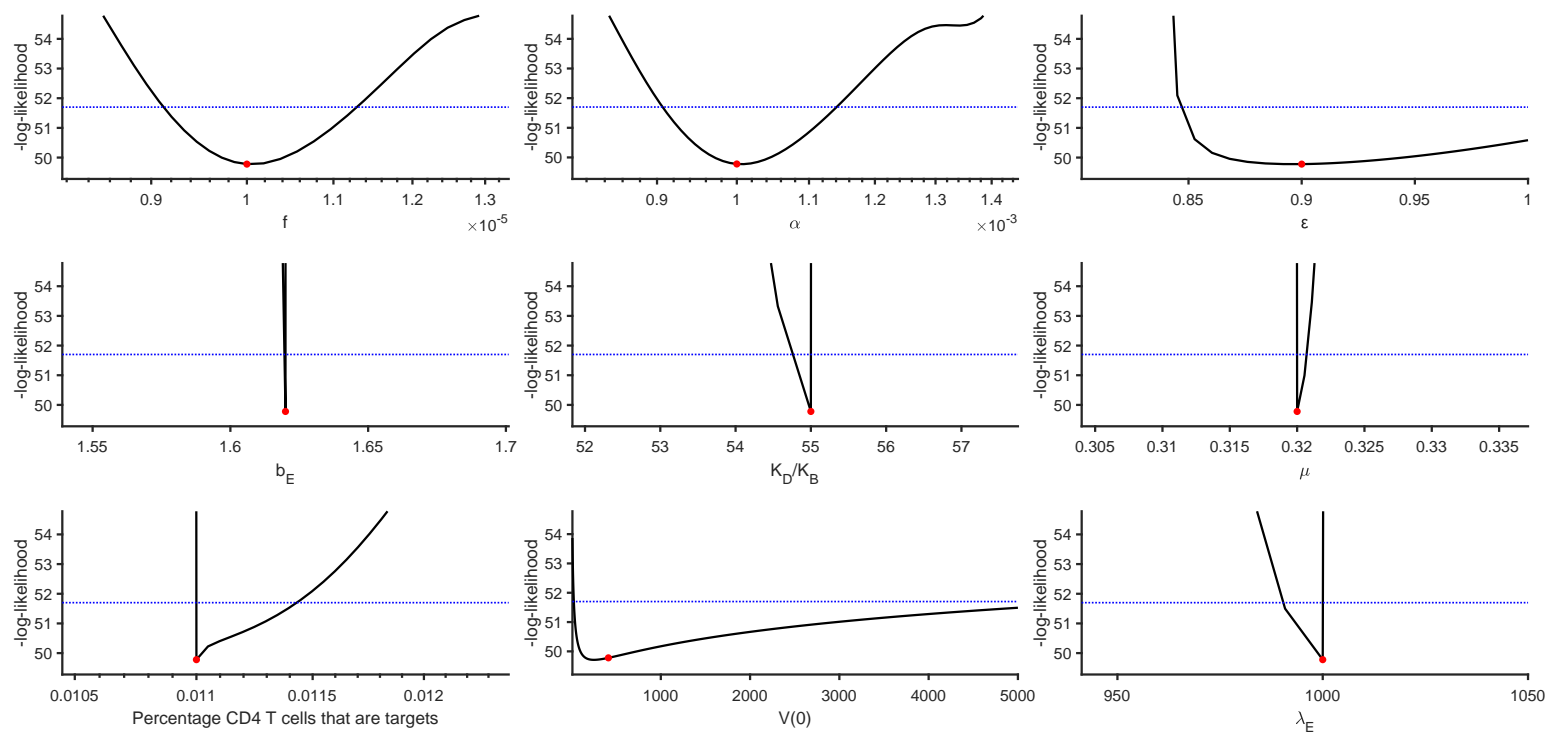

RSd14: Increased antigen presentation (SS)

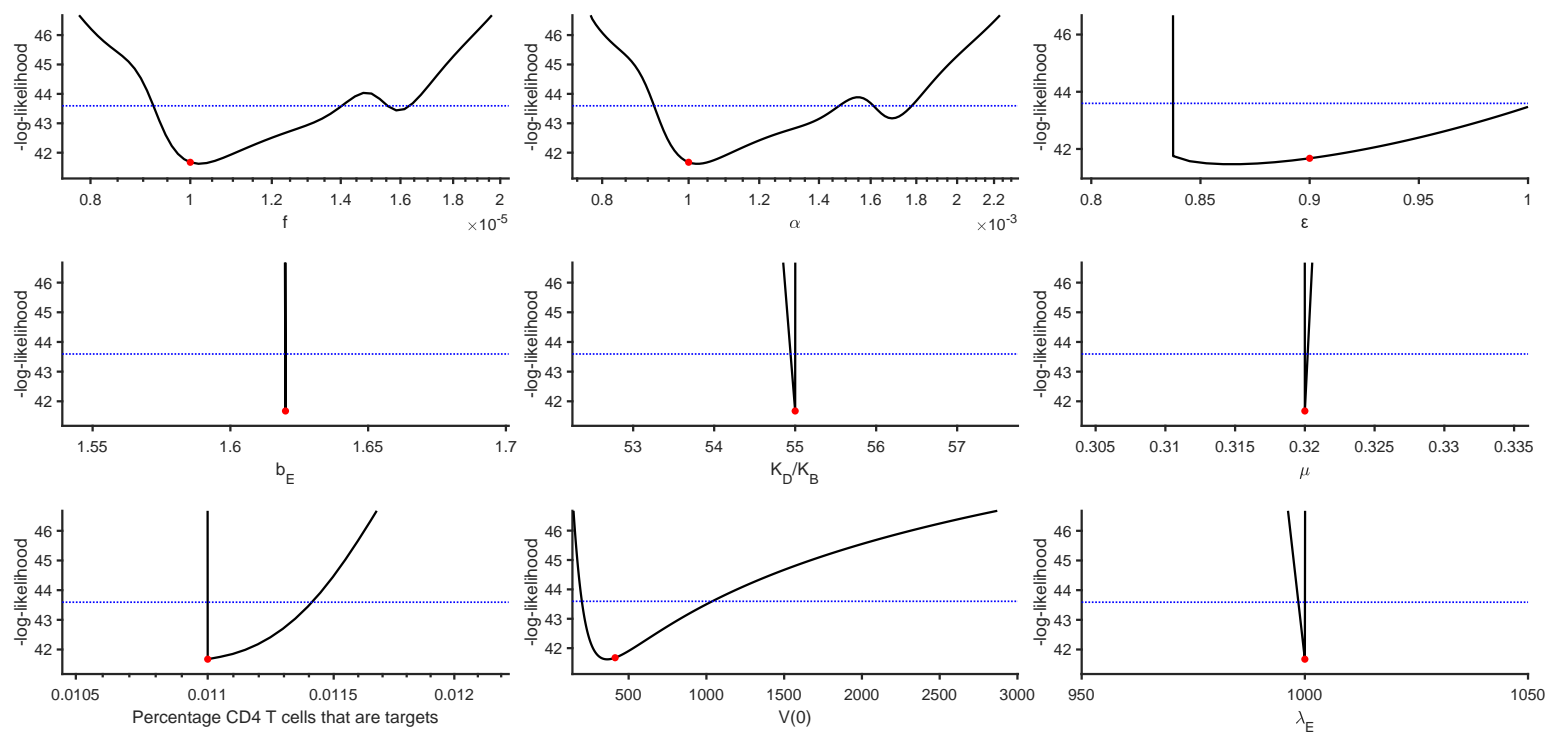

ROv14: Increased antigen presentation (SS)

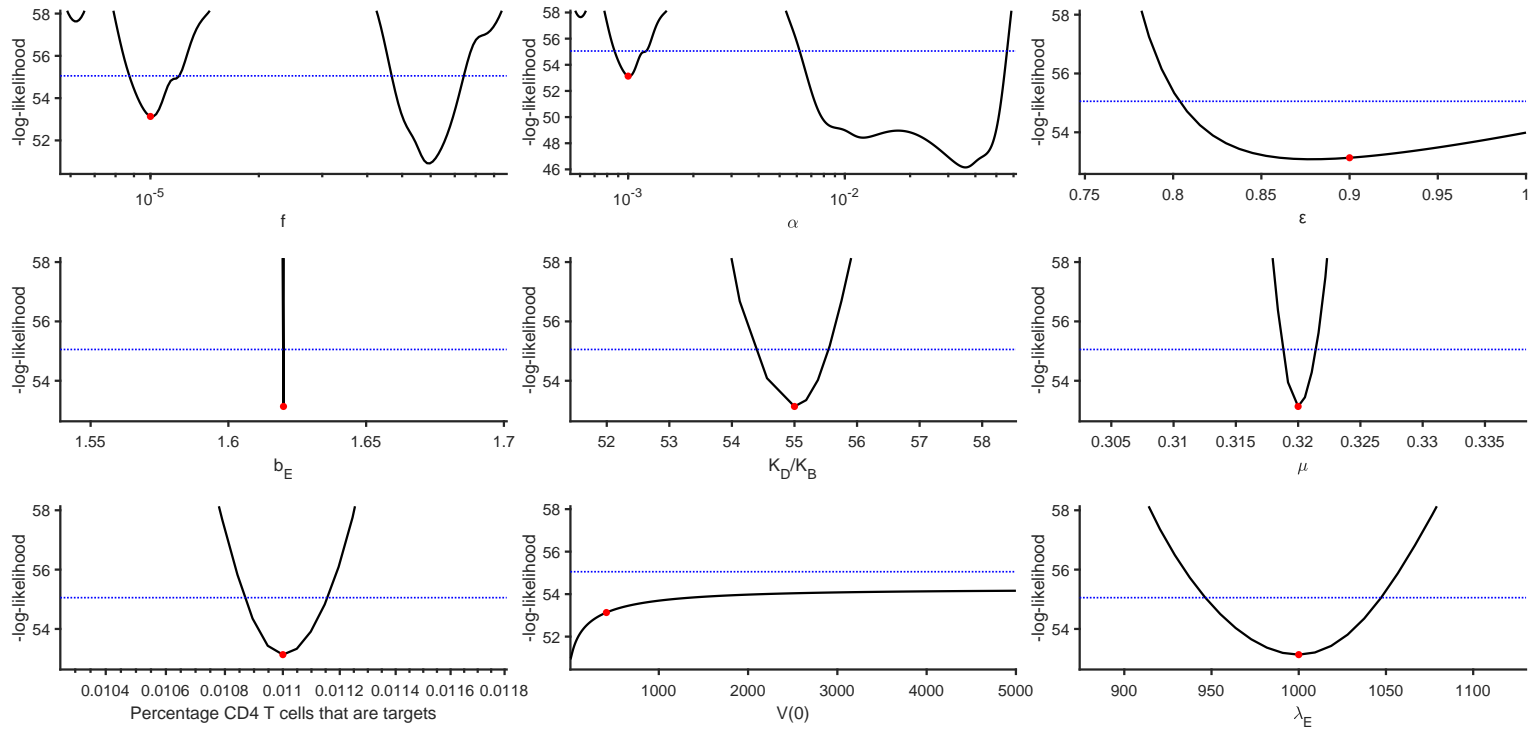

## 10.3 Antigen presenting cell effector cell source model

ROq14: Increased antigen presentation (APCS)

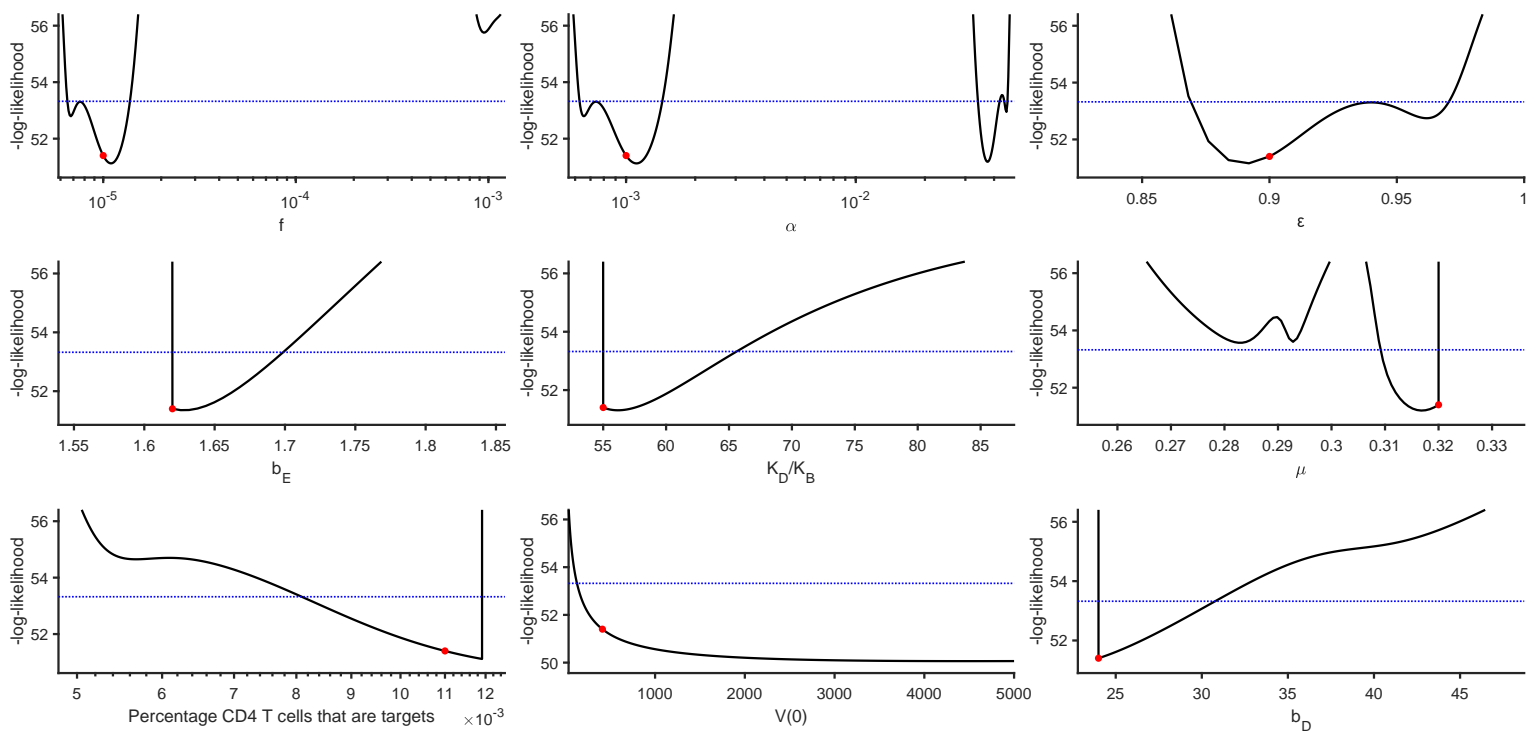

RDa15:Increased antigen presentation (APCS)

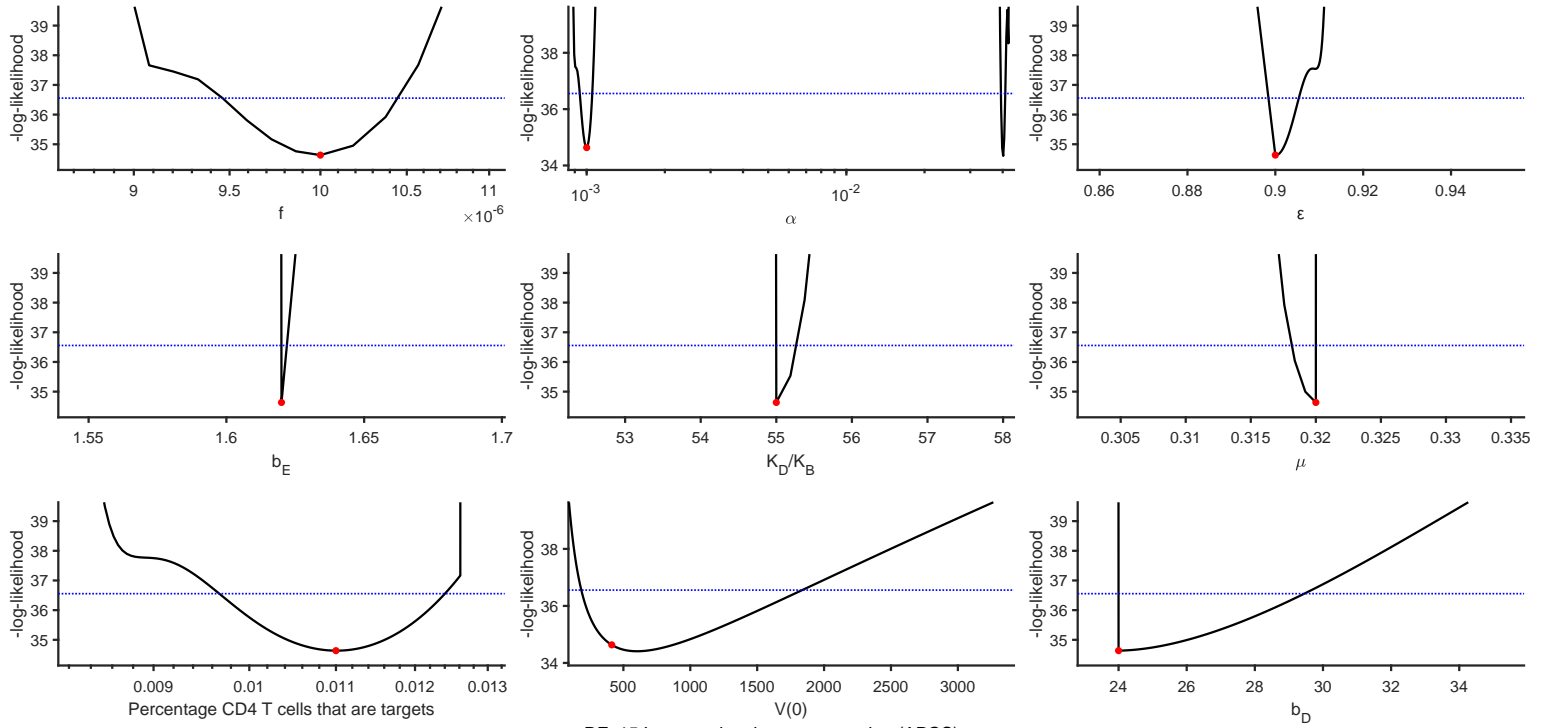

RFa15:Increased antigen presentation (APCS)

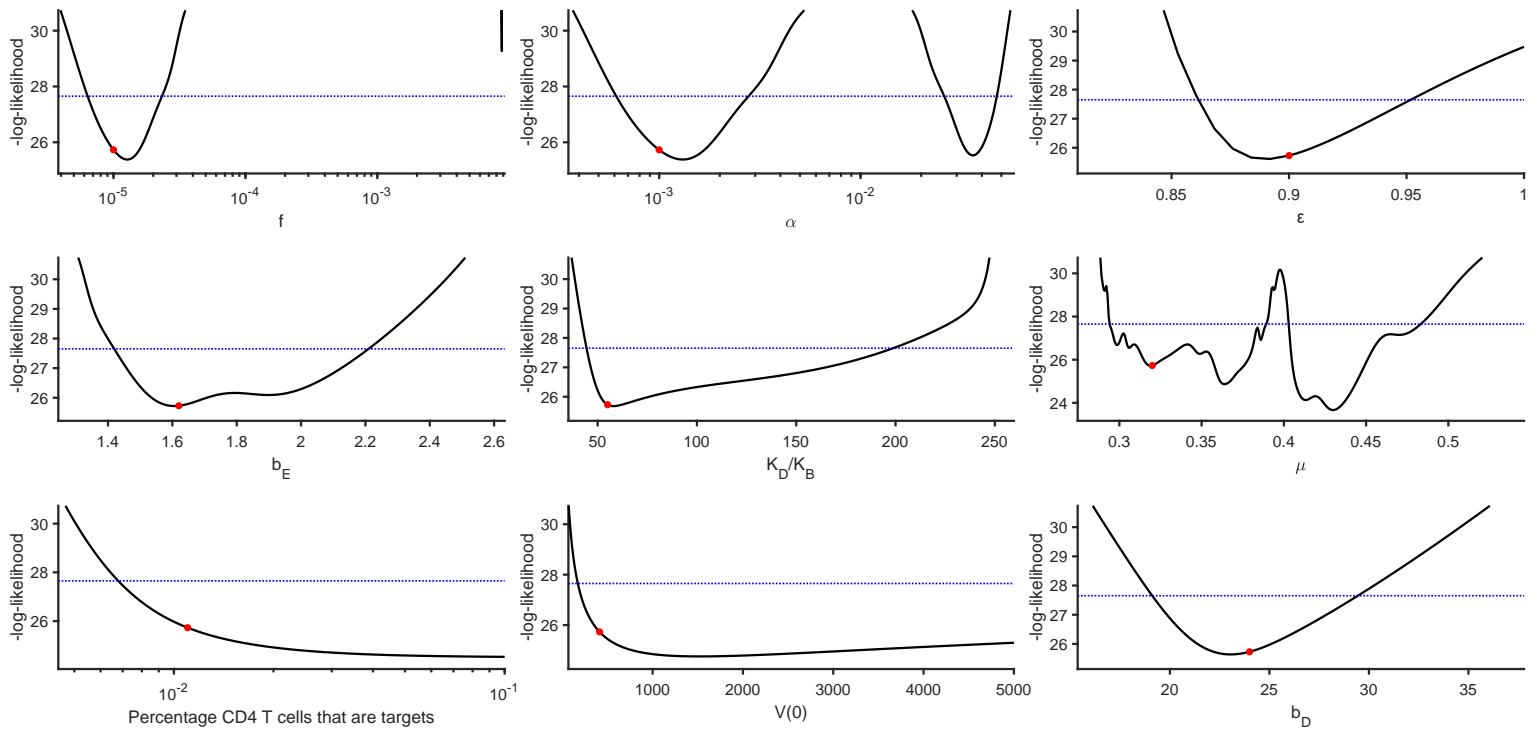

RLn12:Increased antigen presentation (APCS)

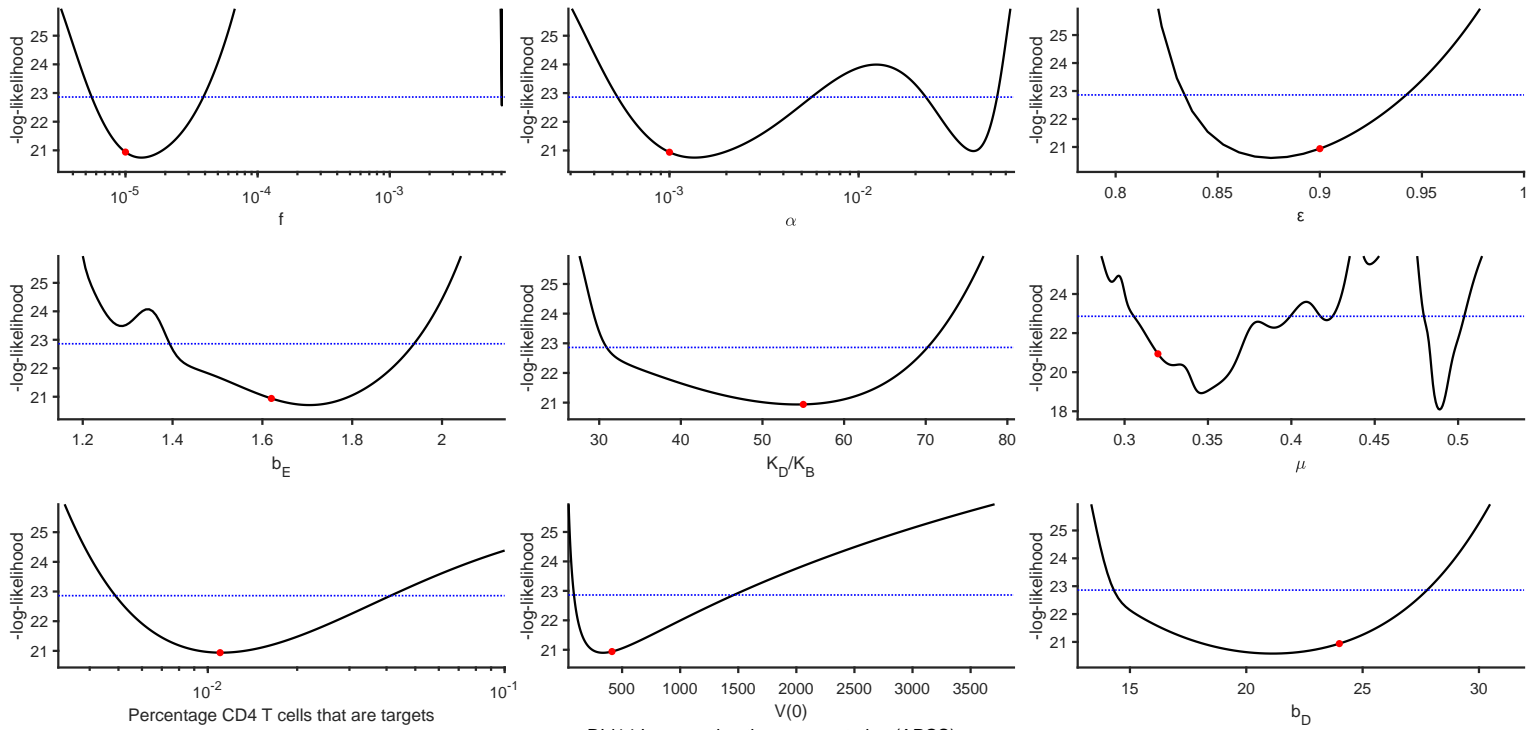

Rld14:Increased antigen presentation (APCS)

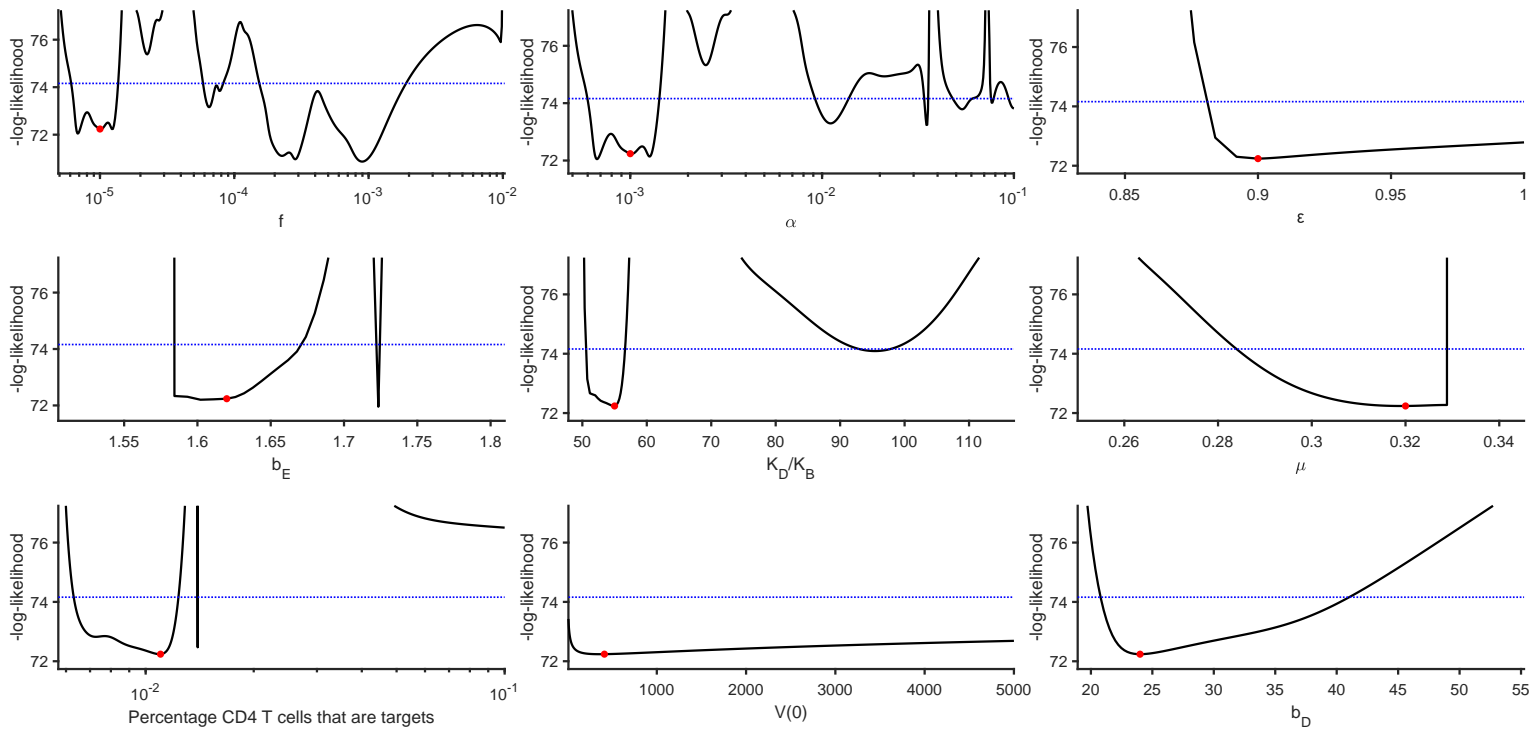

ROo13: Increased antigen presentation (APCS)

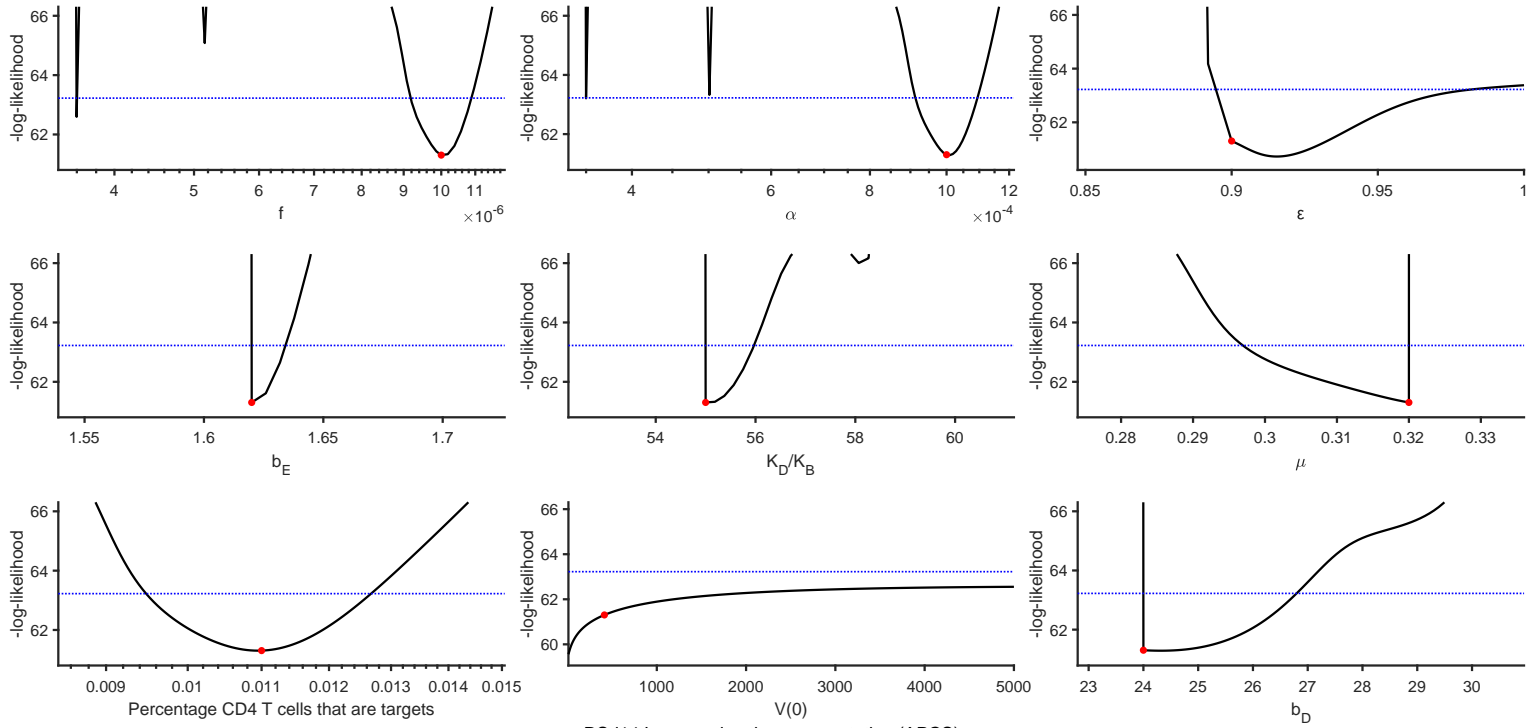

RSd14: Increased antigen presentation (APCS)

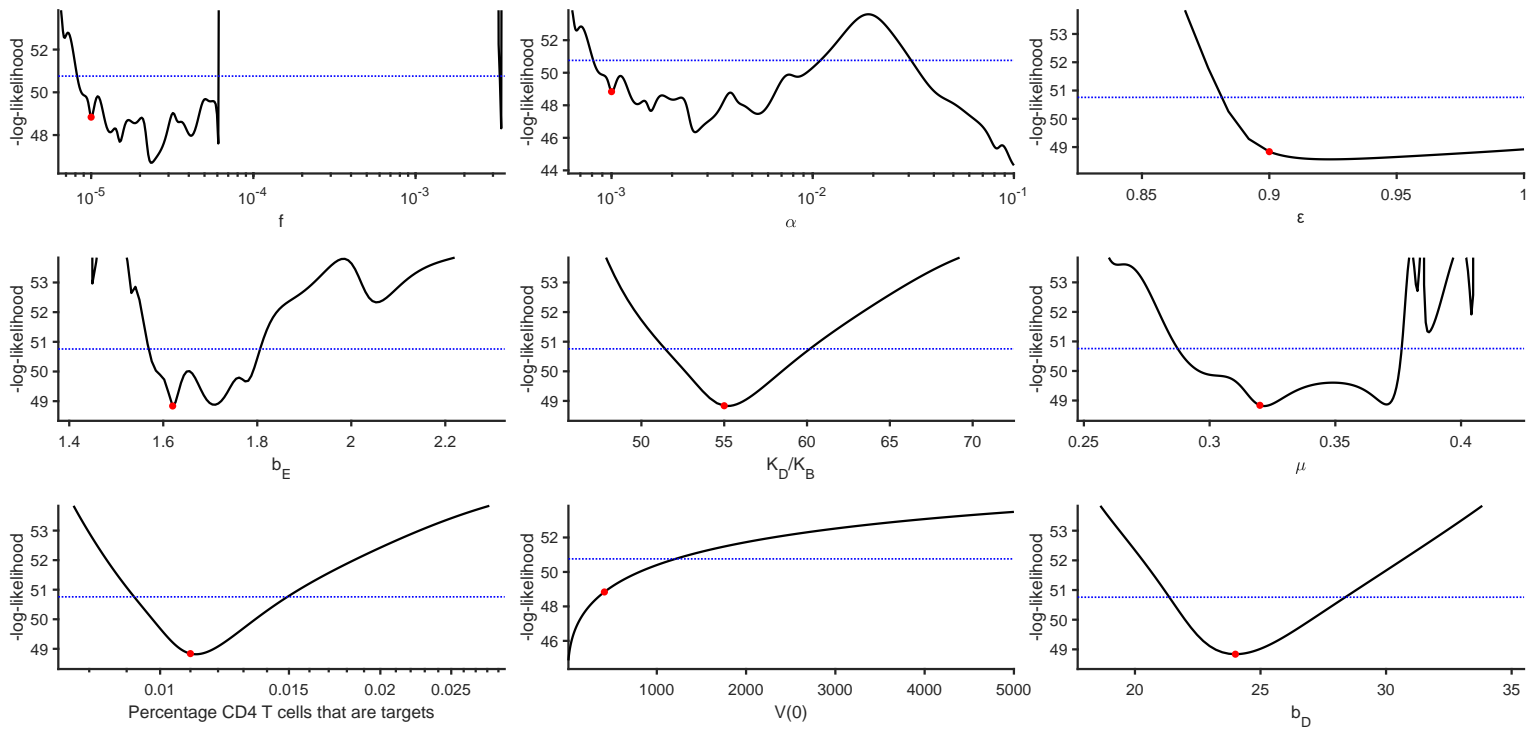

ROv14: Increased antigen presentation (APCS)

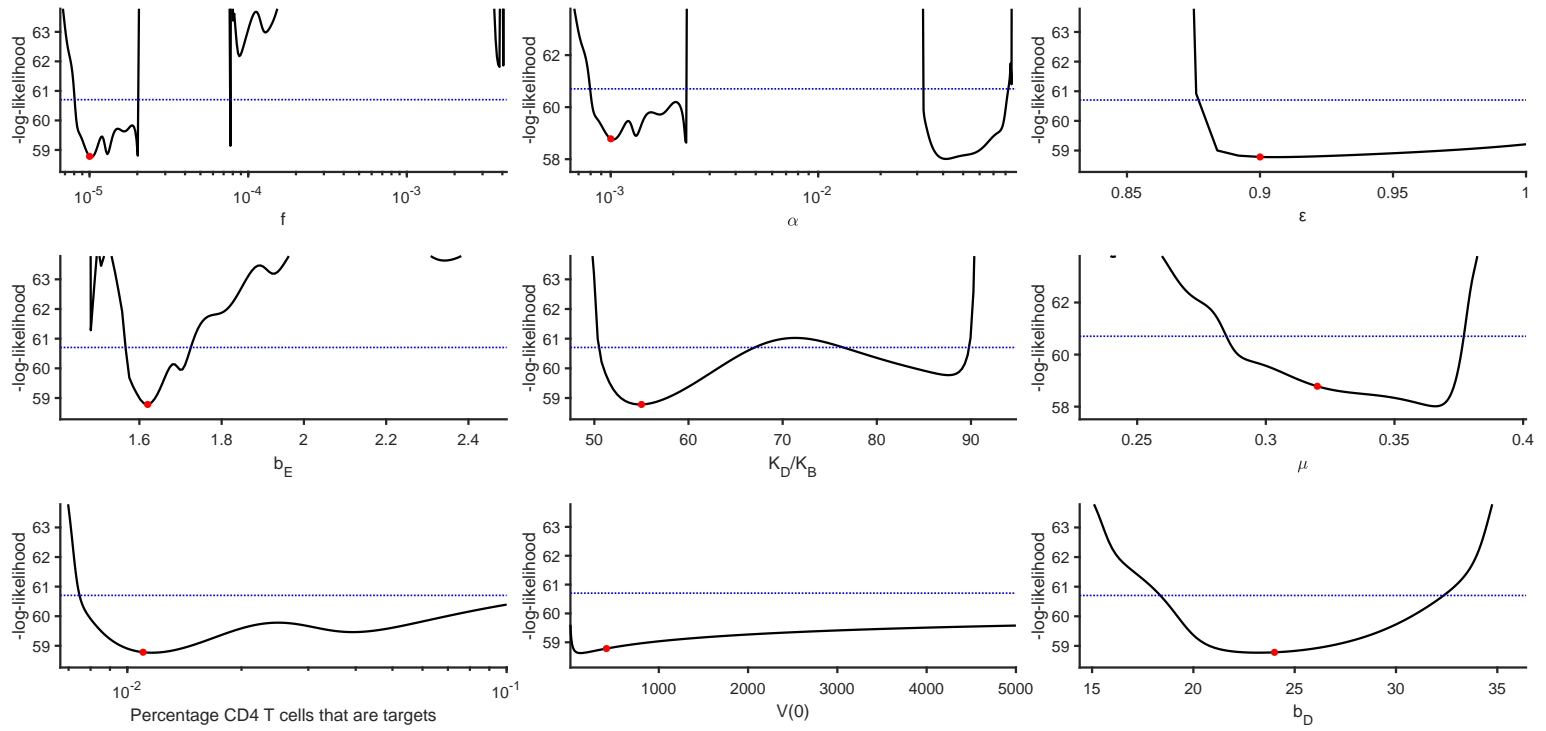



# 11 Likelihood profiles: Increased antigen presentation with increased viral clearance

## 11.1 Baseline effector cell source model

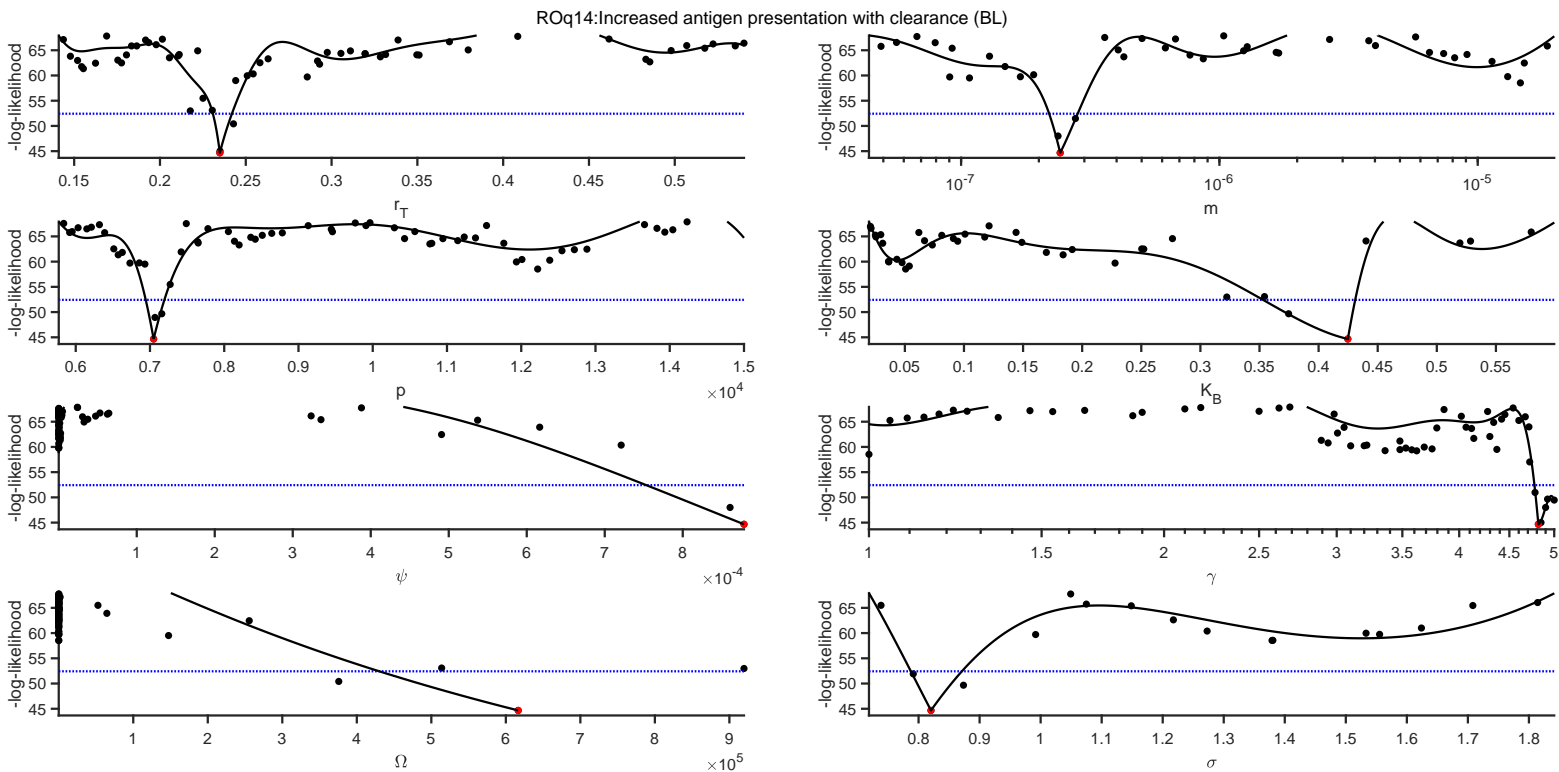

RDa15: Increased antigen presentation with clearance (BL)

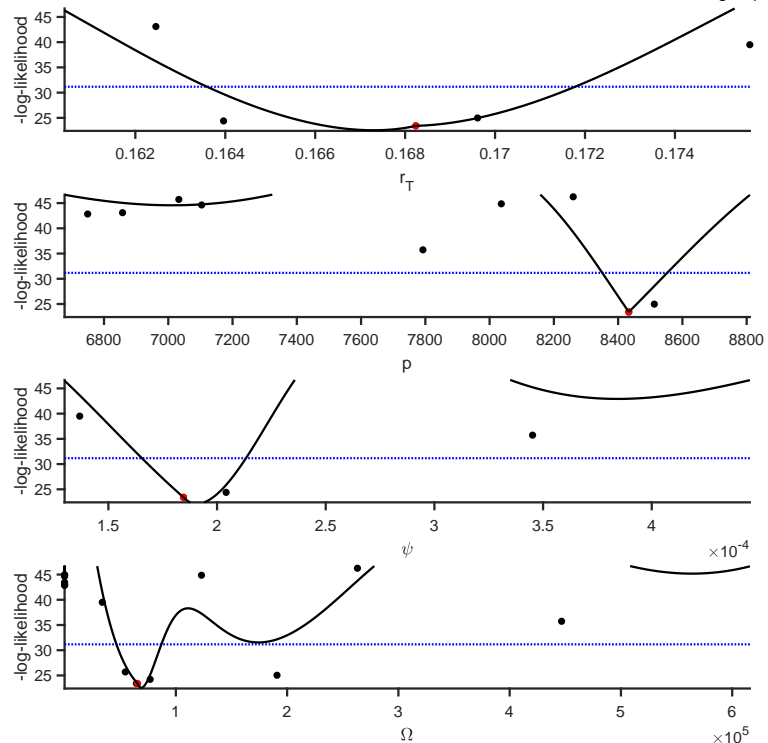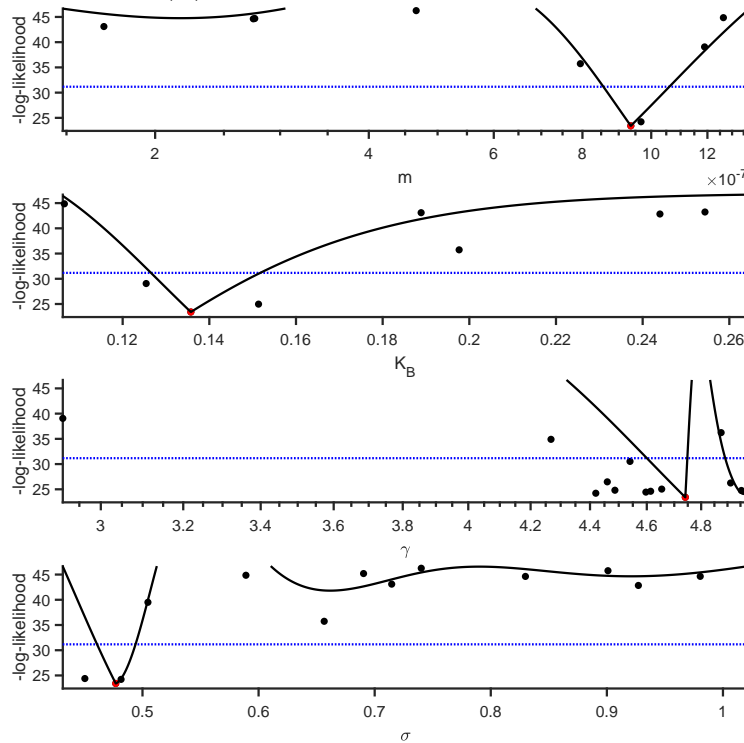

RFa15: Increased antigen presentation with clearance (BL)

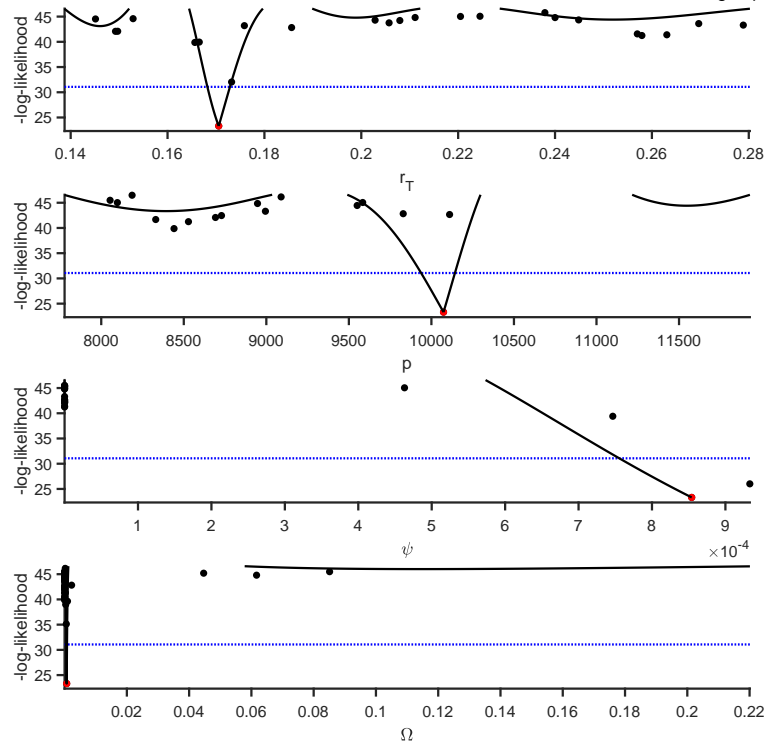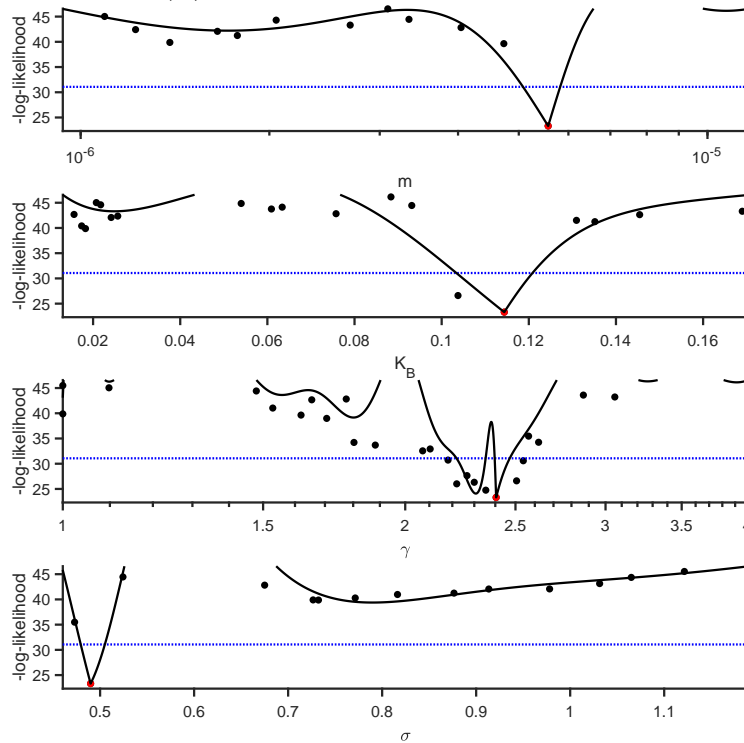

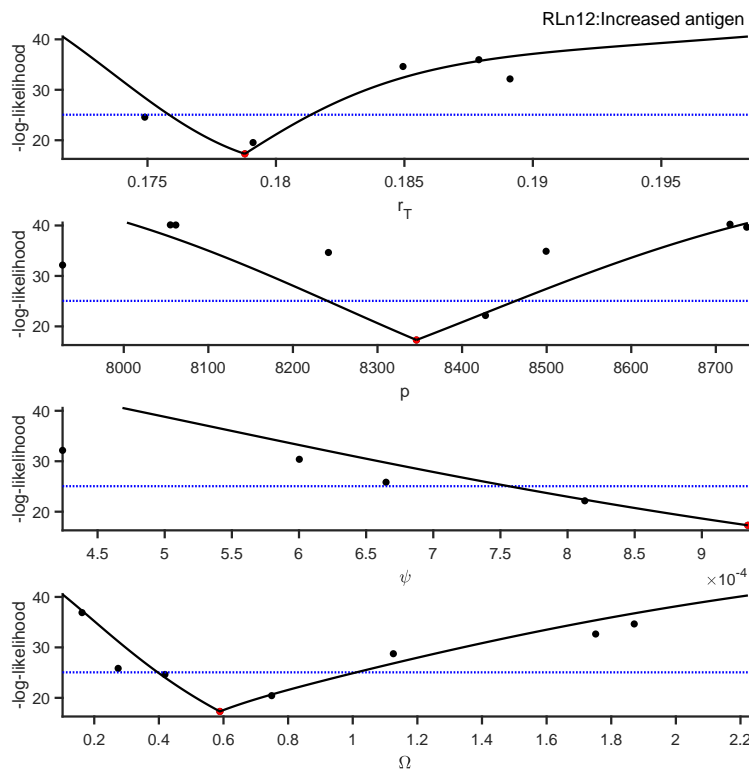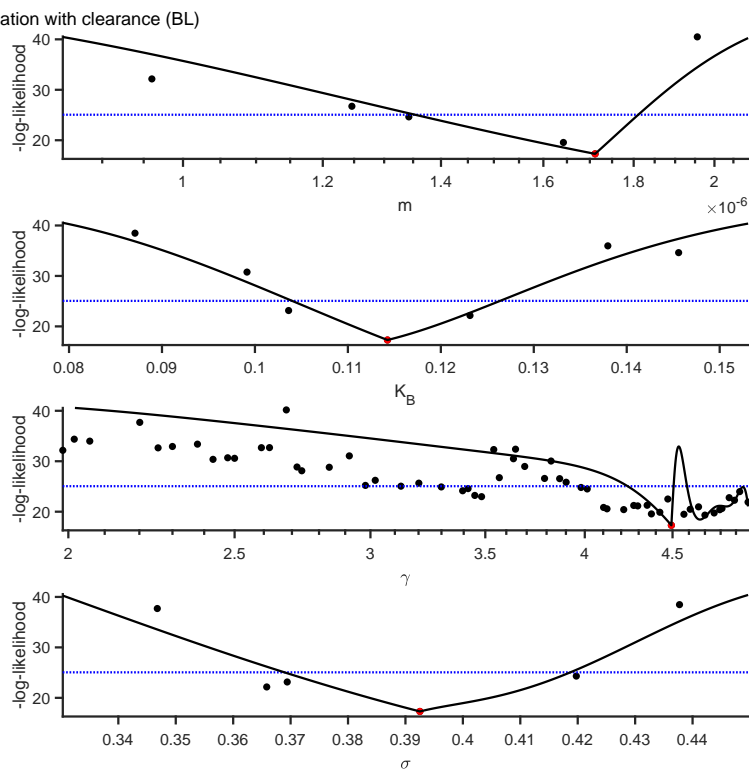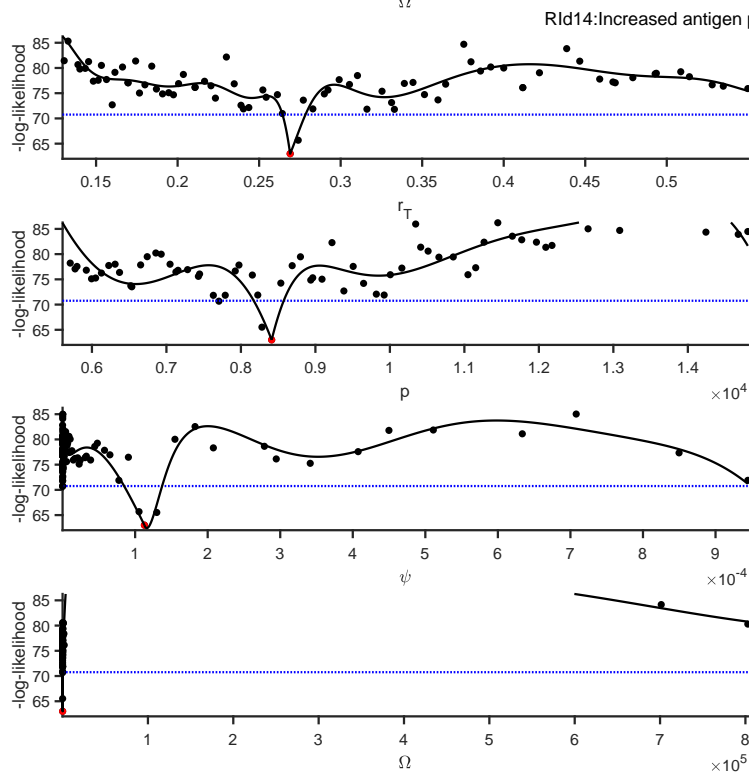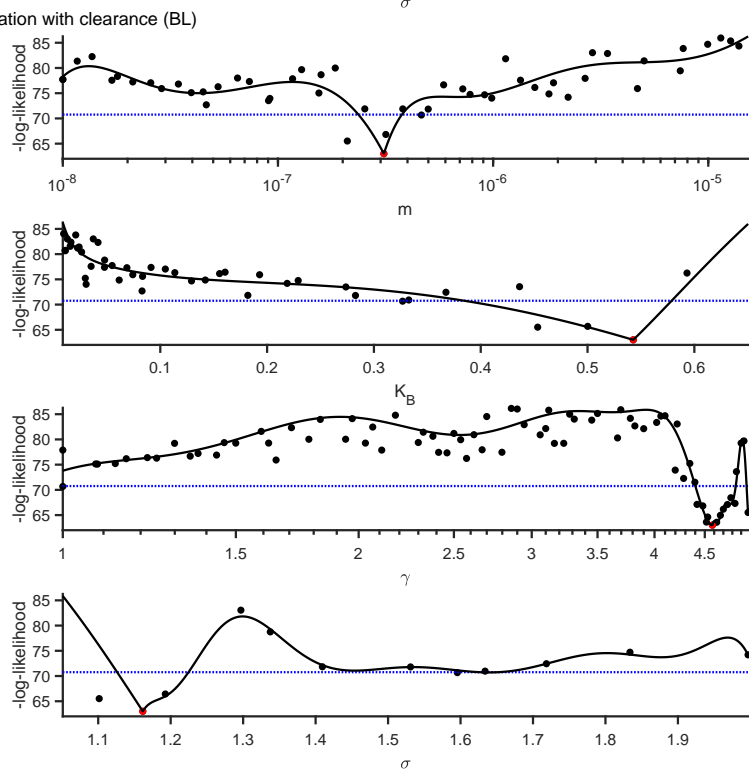

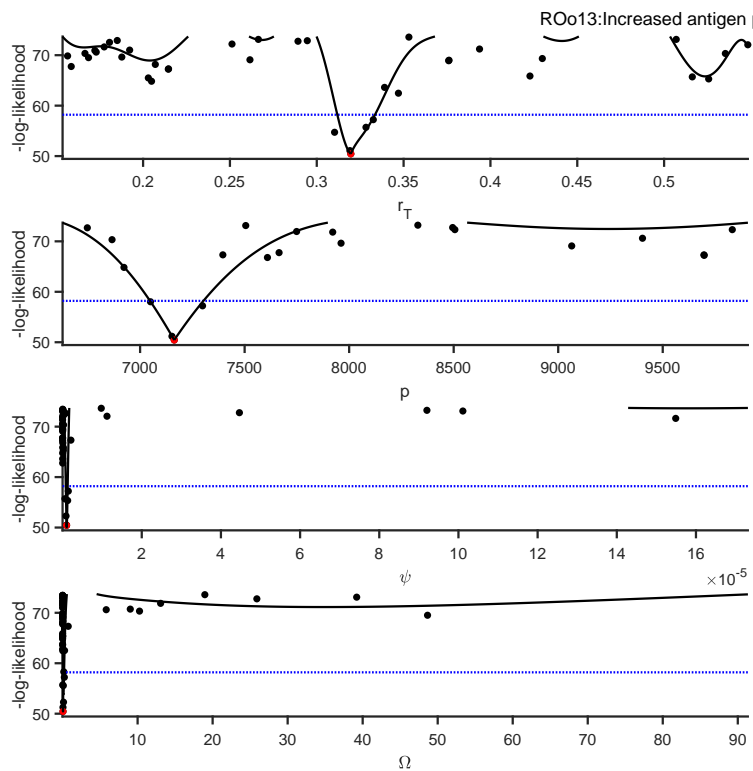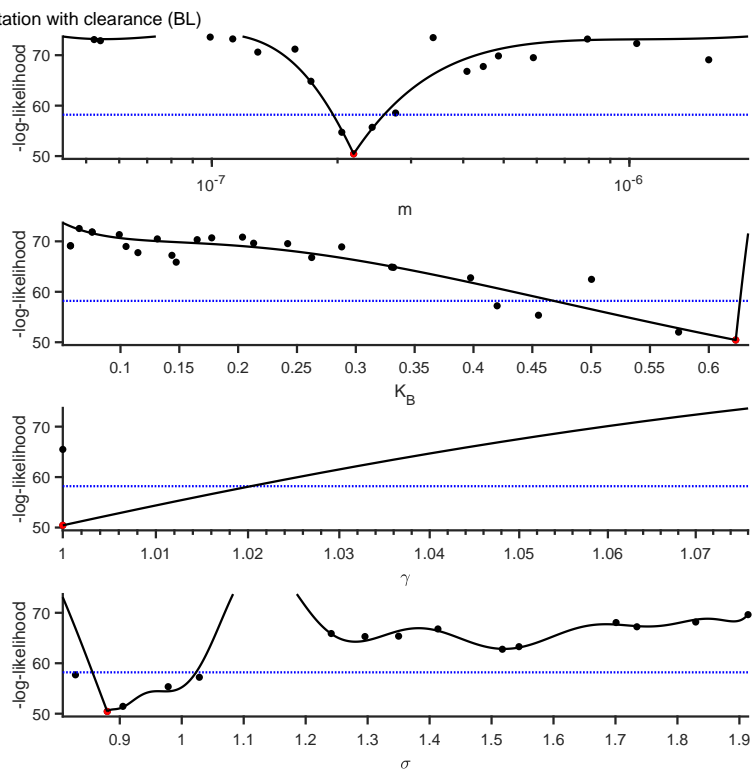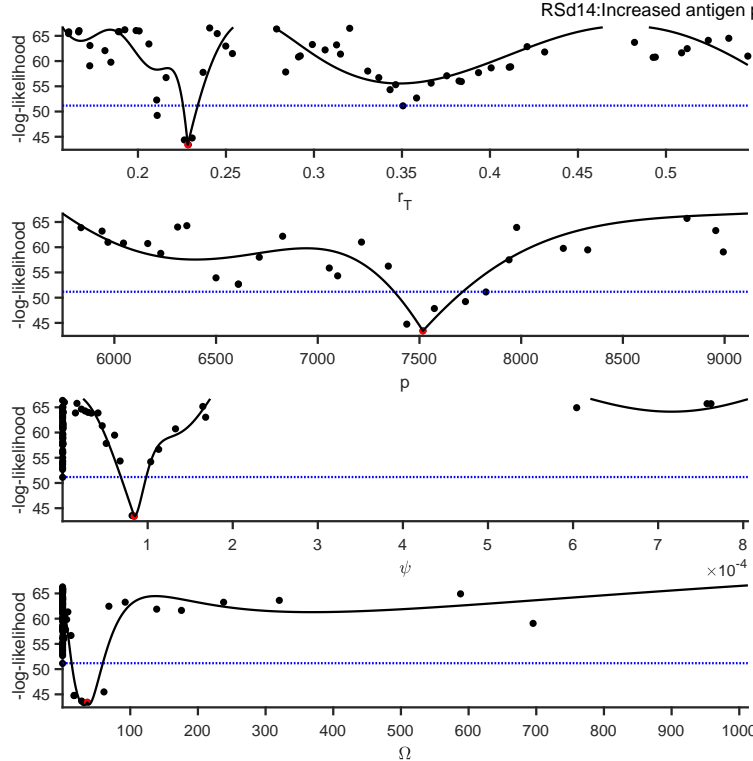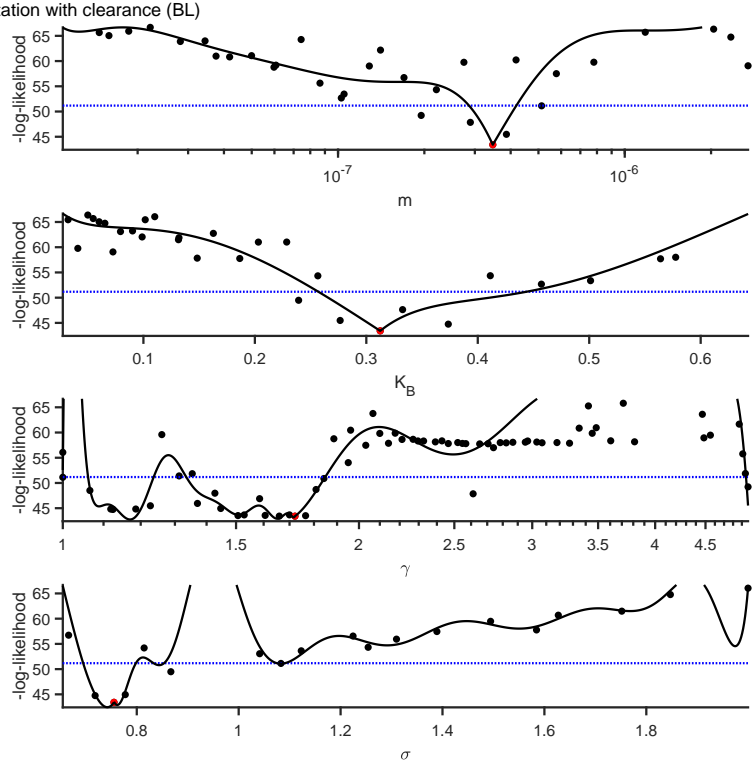

ROV14: Increased antigen presentation with clearance (BL)

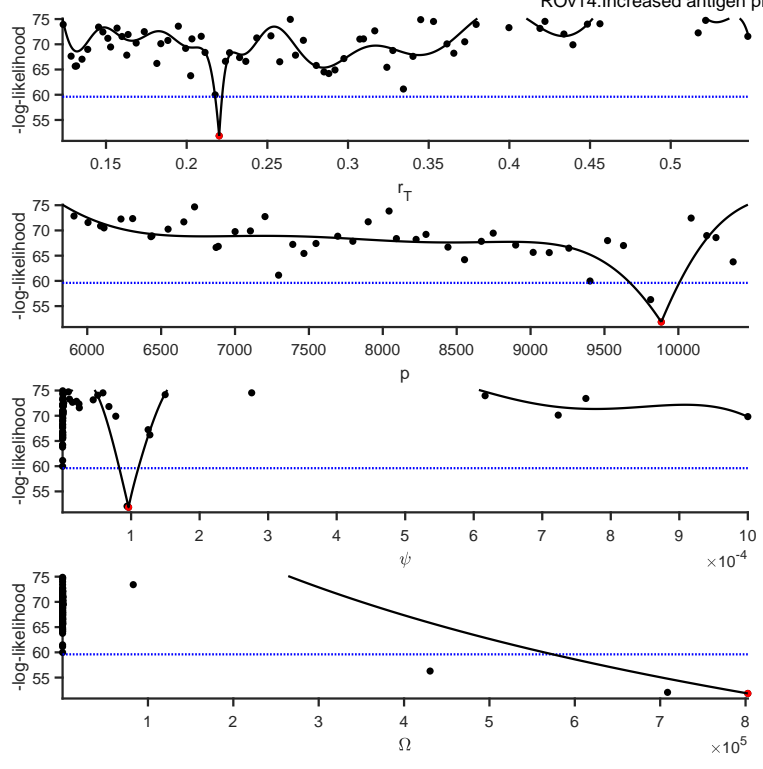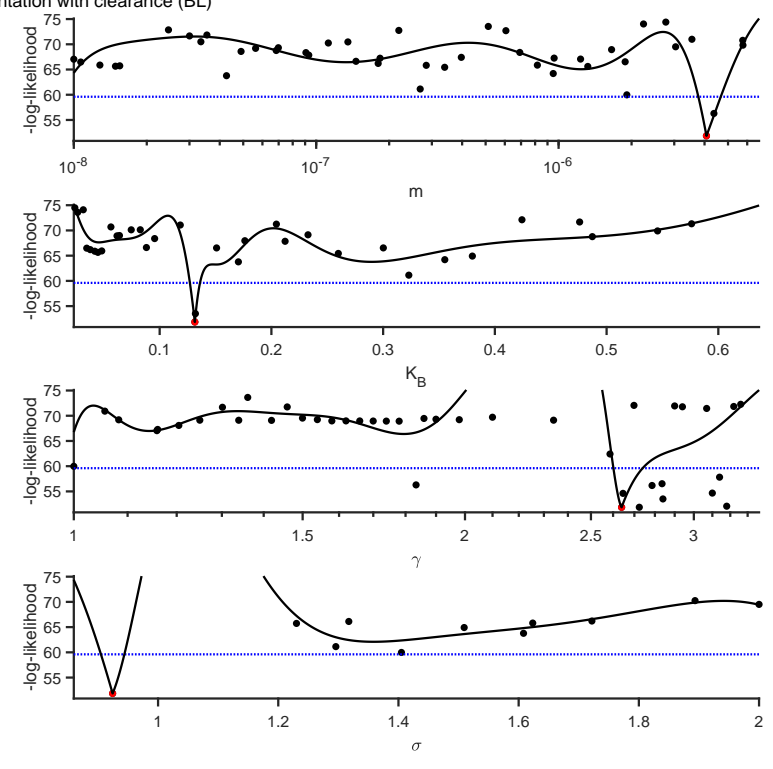

## 11.2 Saturated effector cell source model

ROq14: Increased antigen presentation with clearance (SS)

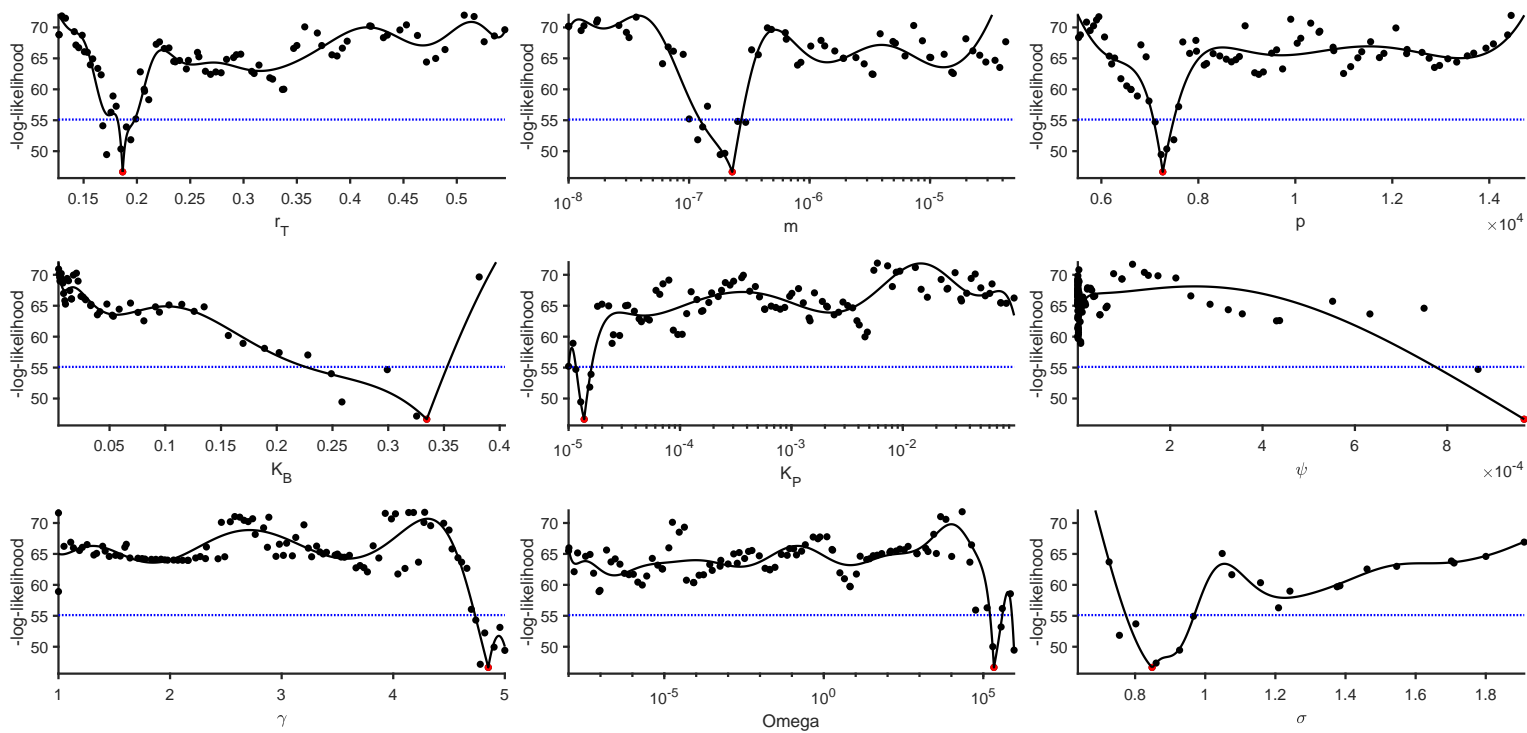

RDa15: Increased antigen presentation with clearance (SS)

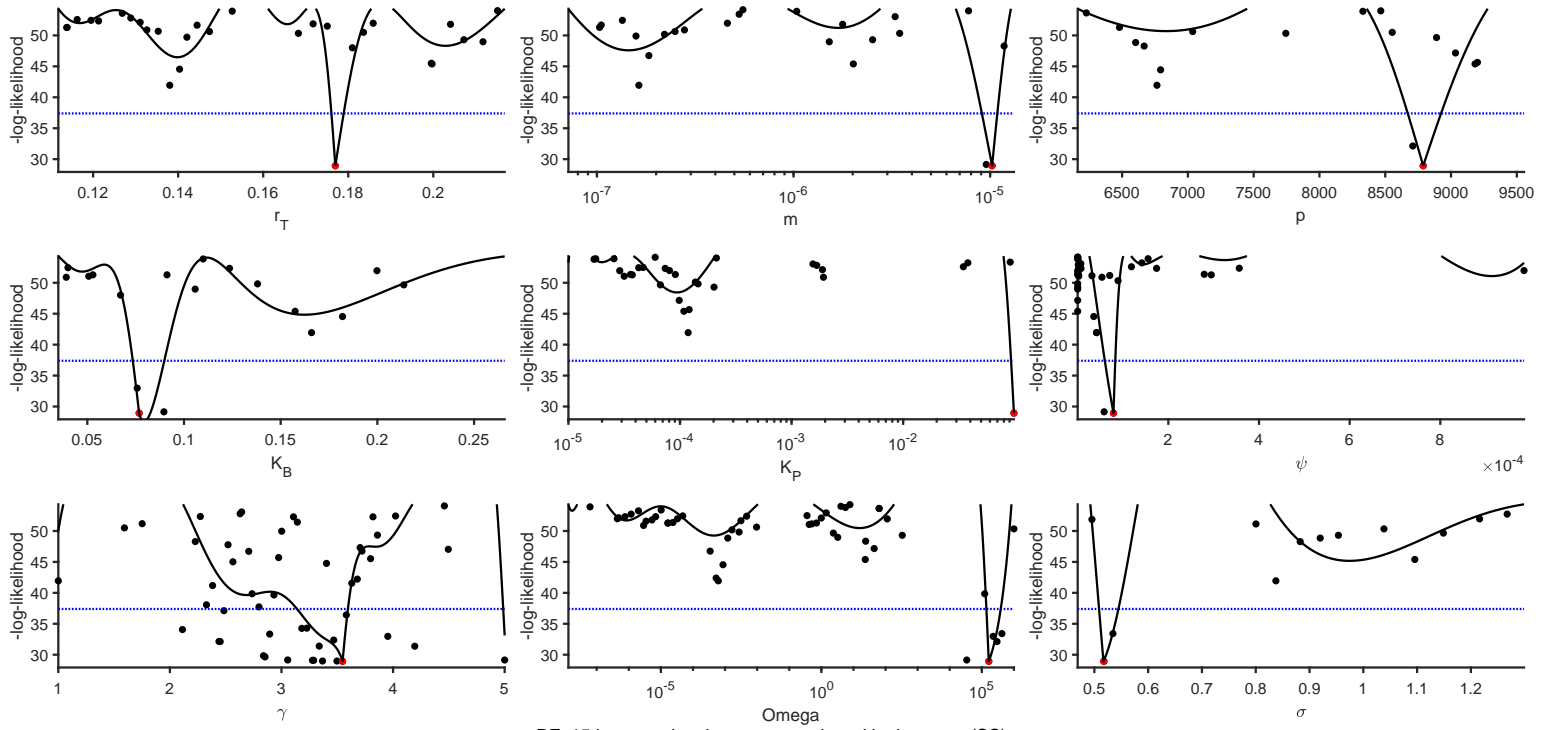

RFa15: Increased antigen presentation with clearance (SS)

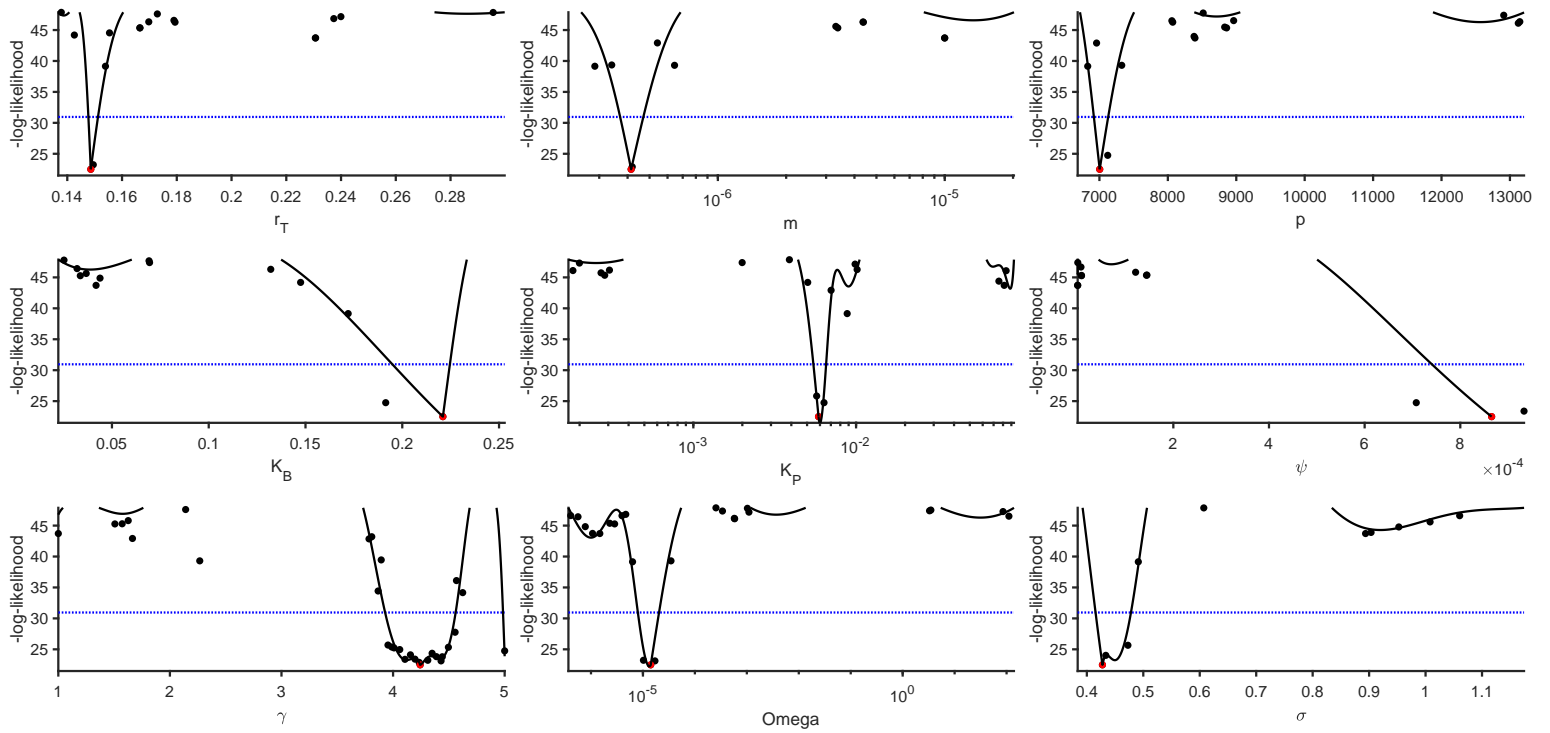

RLn12: Increased antigen presentation with clearance (SS)

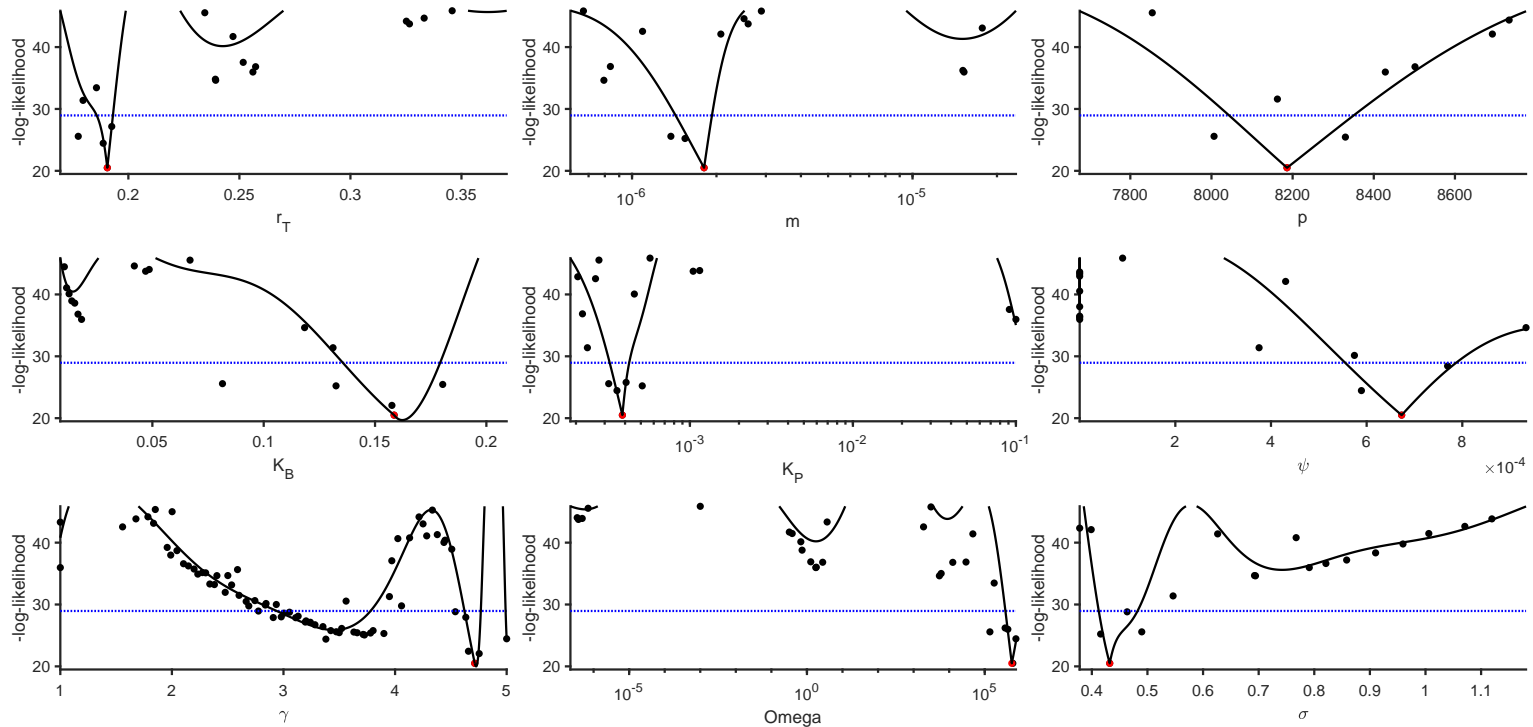

Rld14: Increased antigen presentation with clearance (SS)

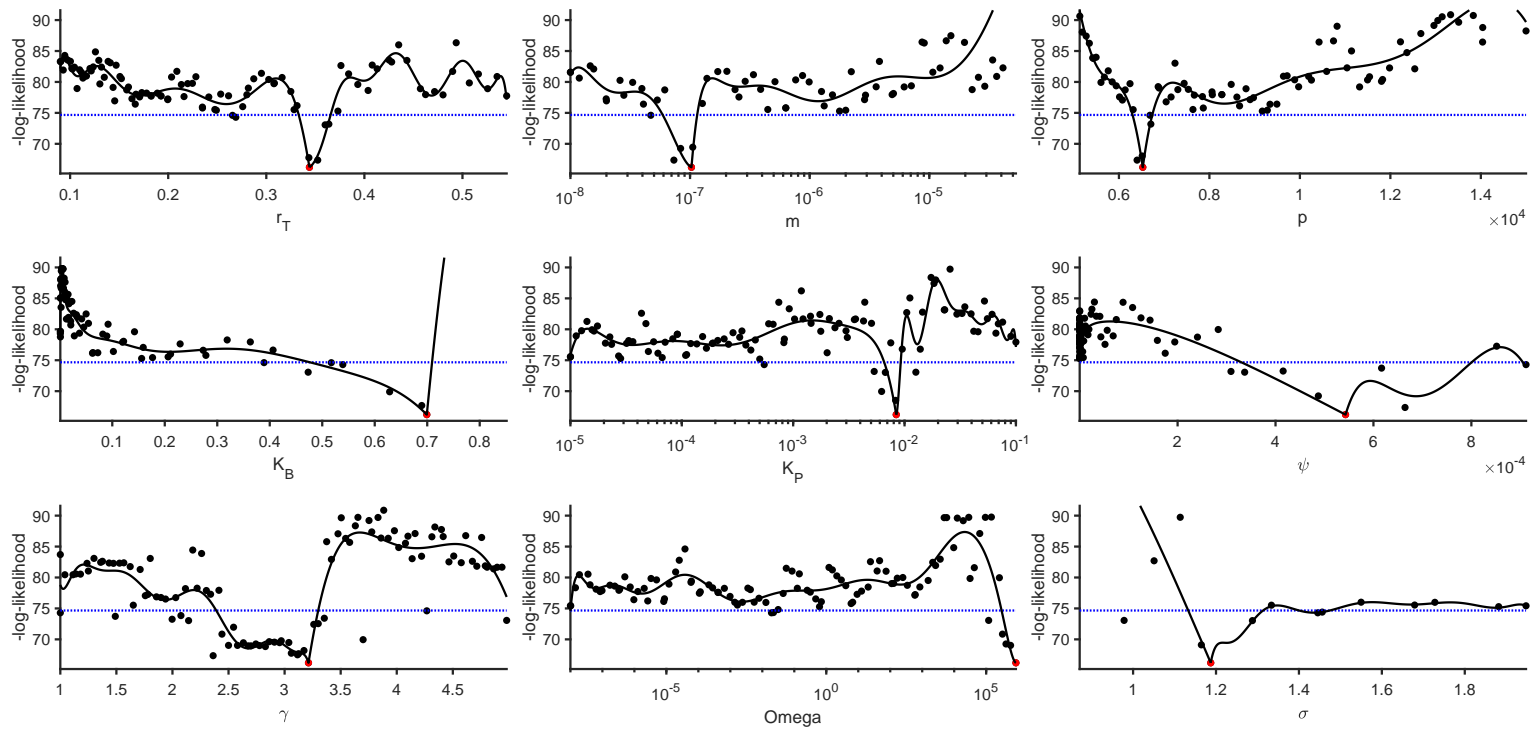



ROo13: Increased antigen presentation with clearance (SS)

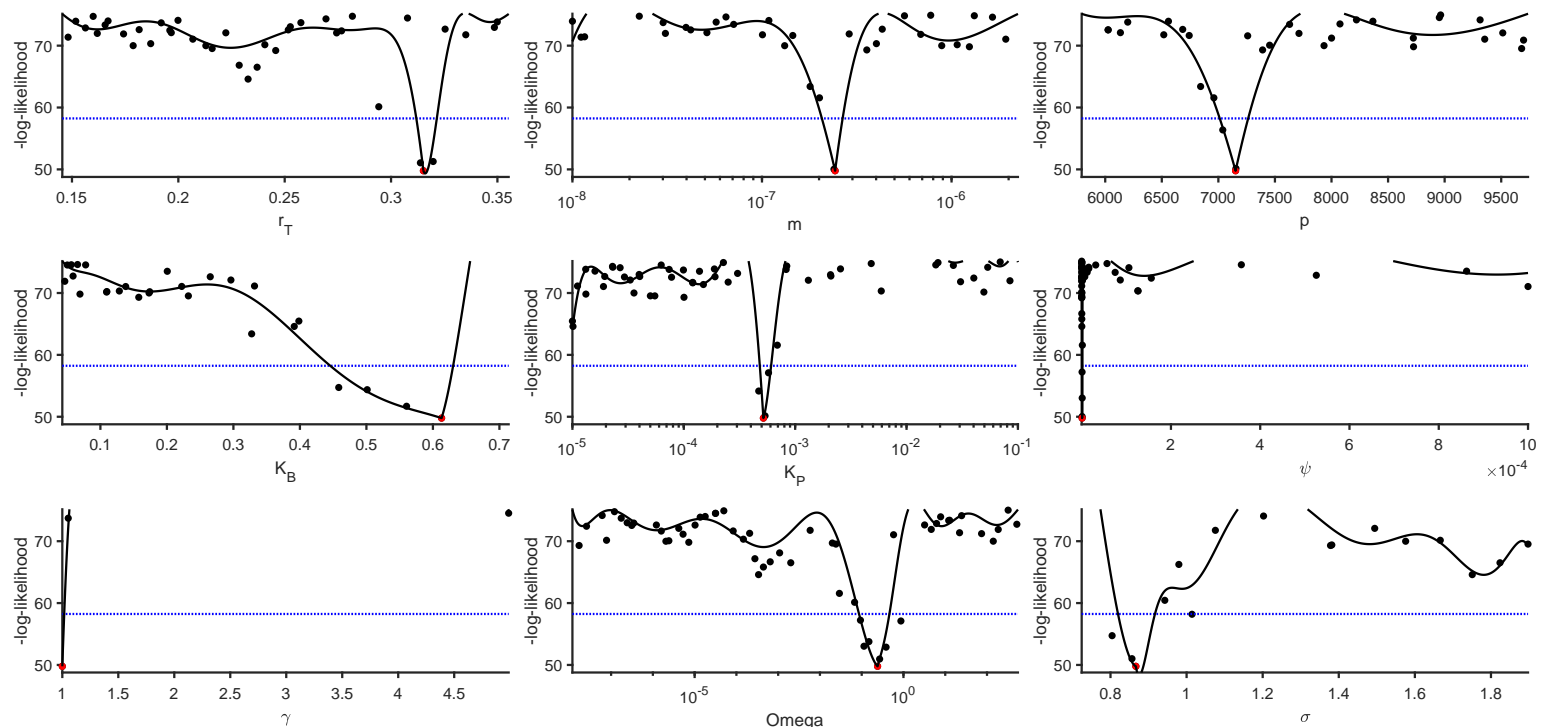

RSd14: Increased antigen presentation with clearance (SS)

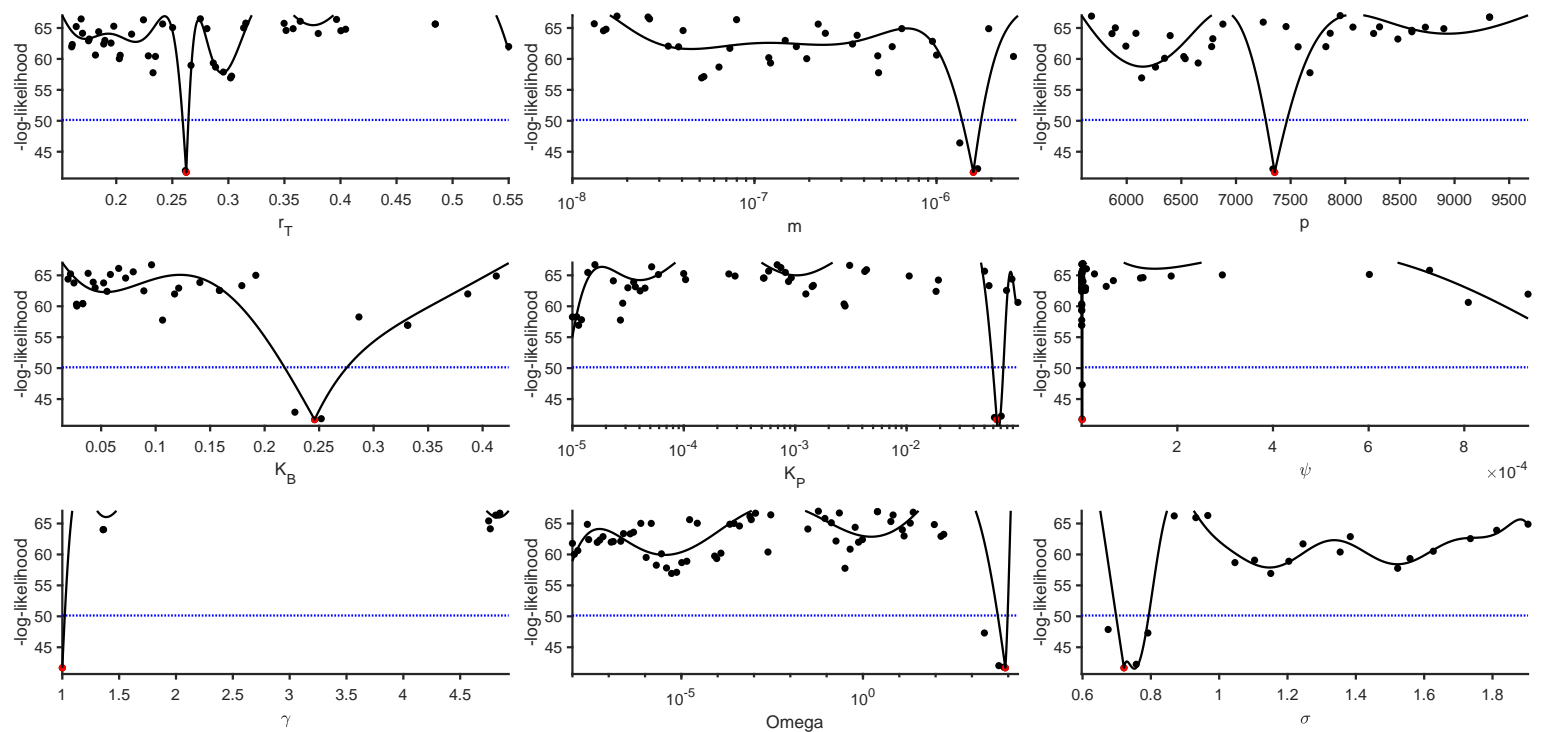

ROv14: Increased antigen presentation with clearance (SS)

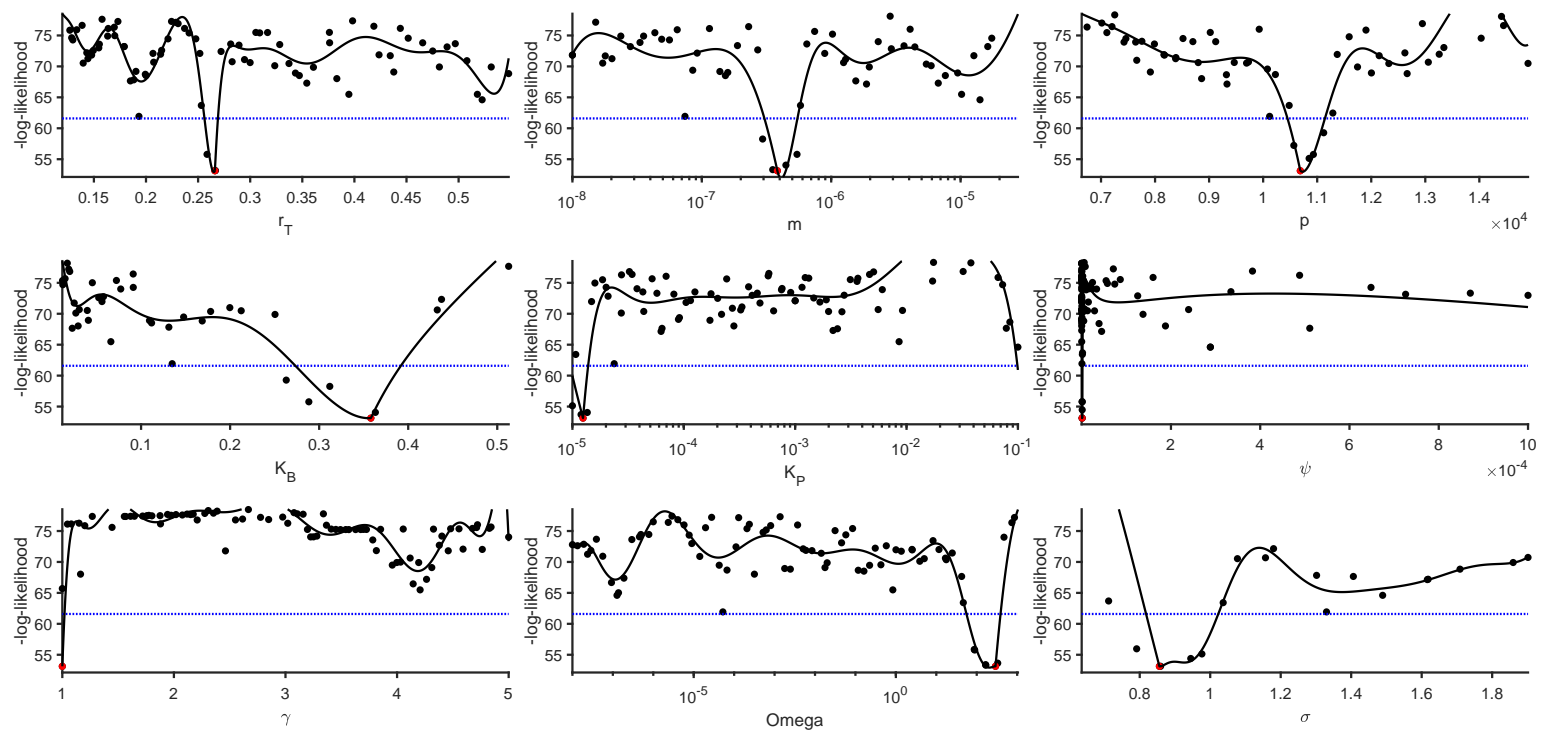

## 11.3 Antigen presenting cell effector cell source model

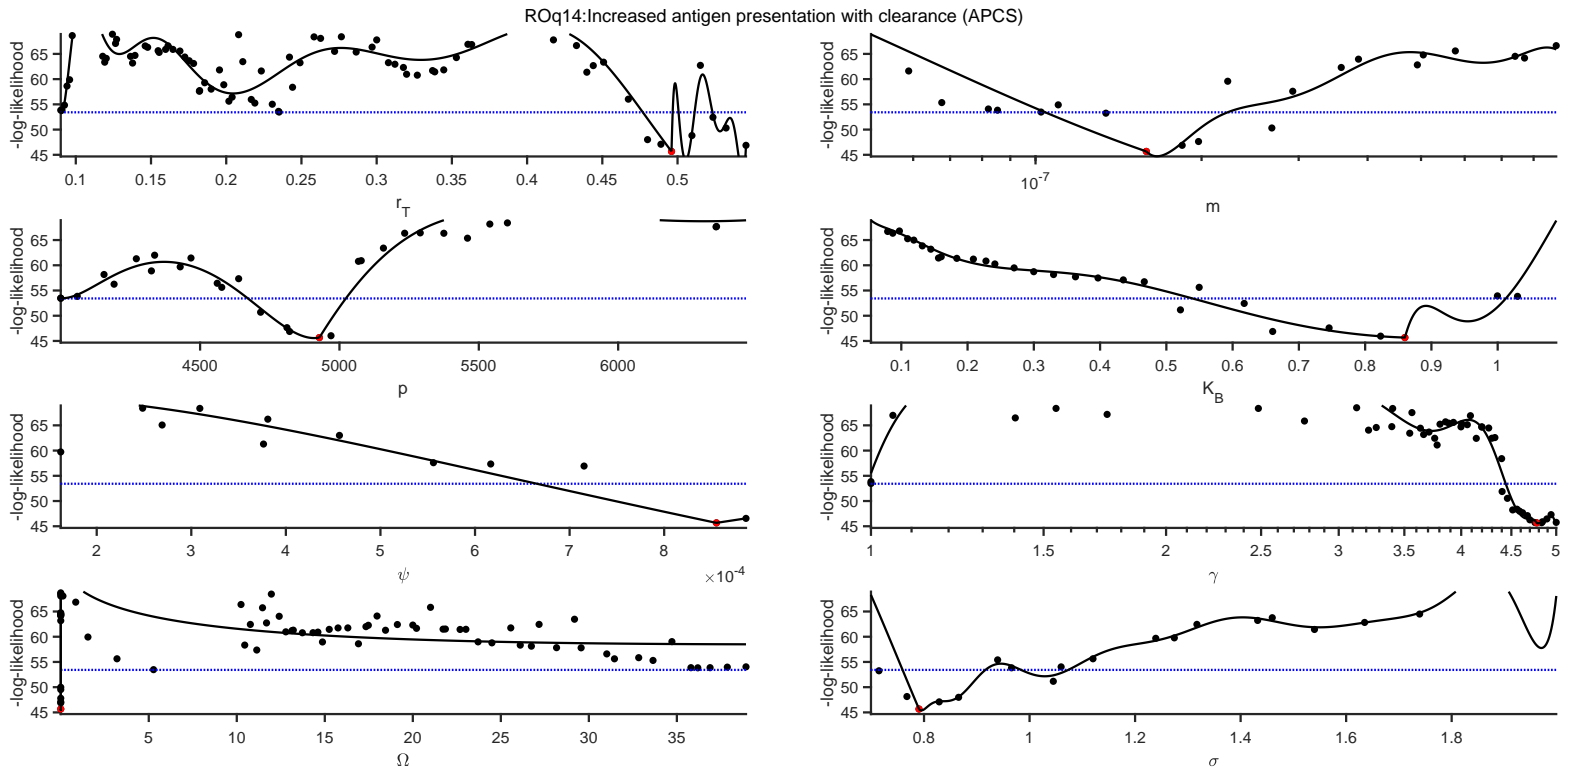

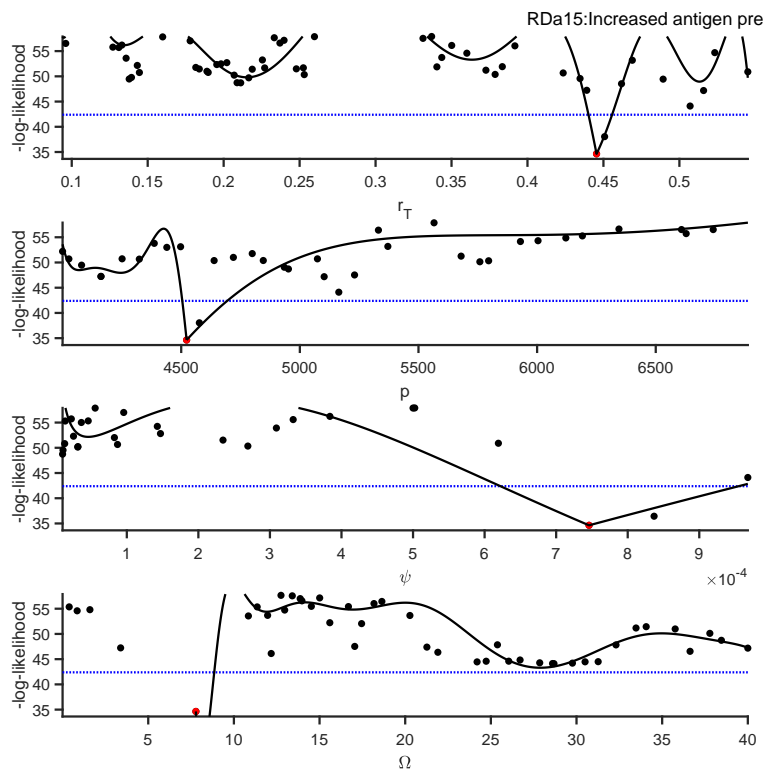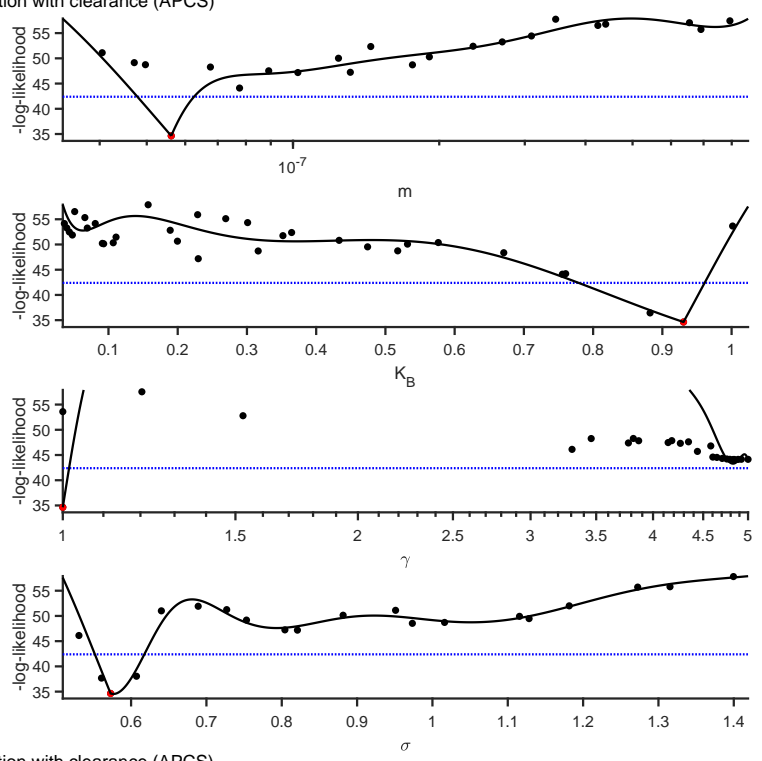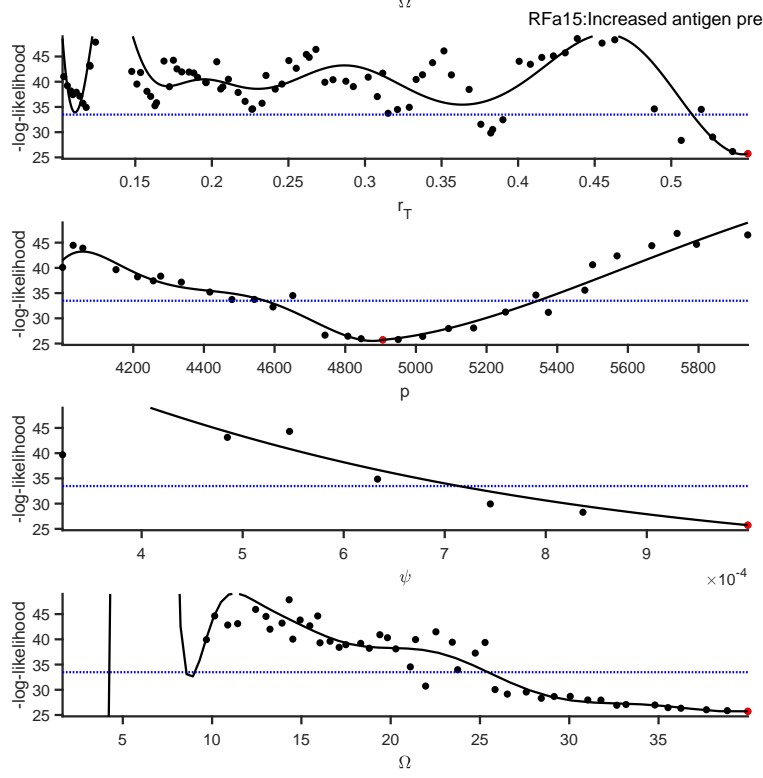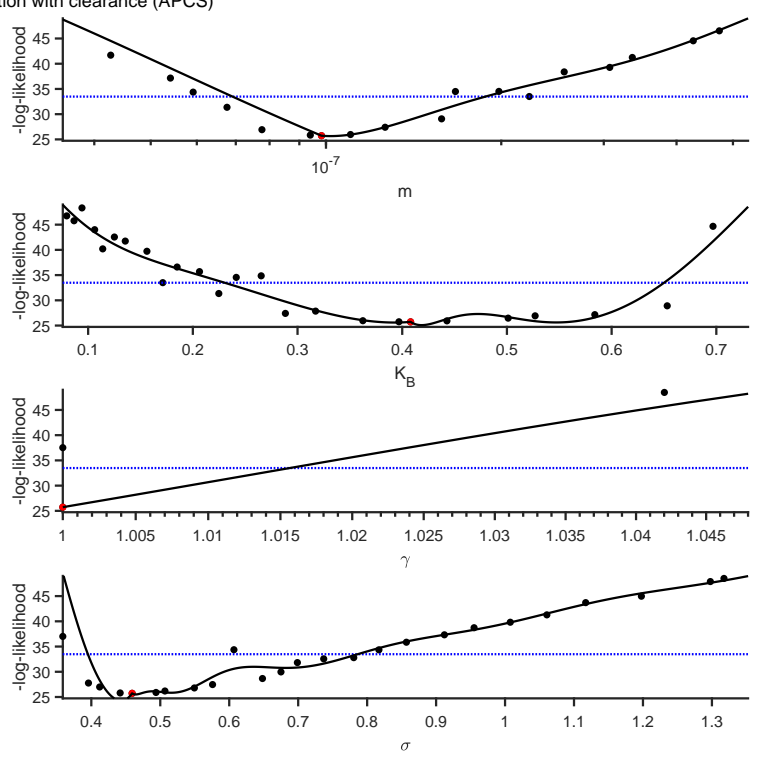

RLn12: Increased antigen presentation with clearance (APCS)

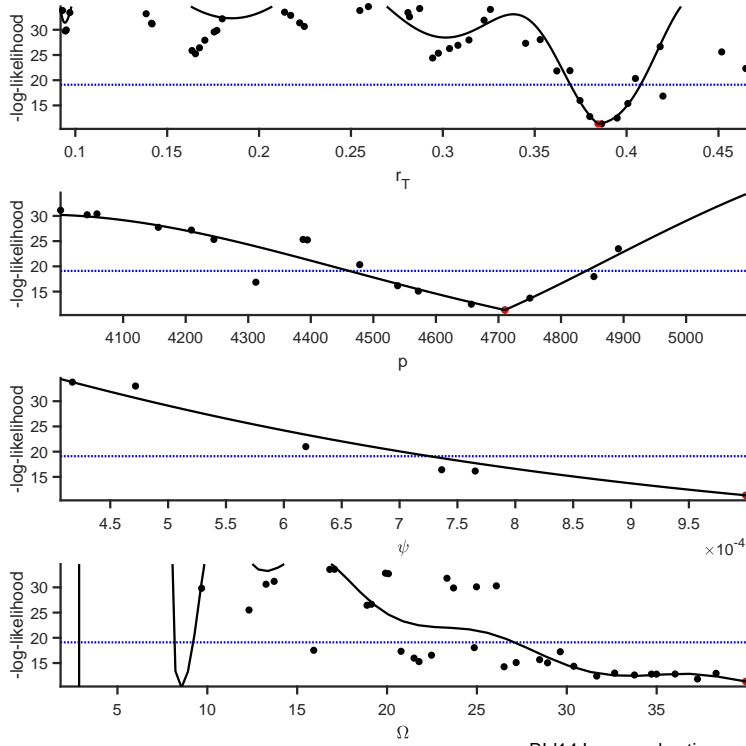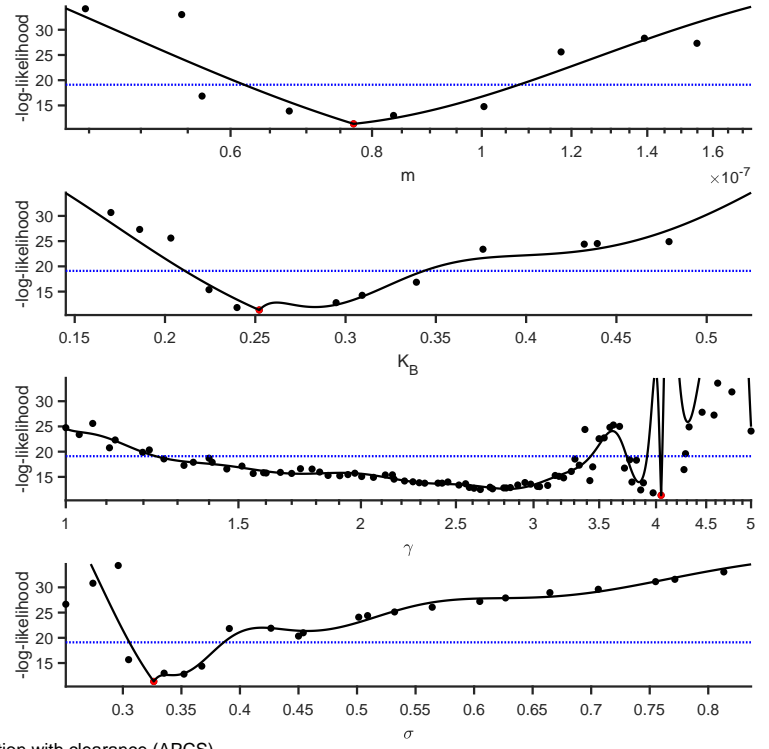

Rld14: Increased antigen presentation with clearance (APCS)

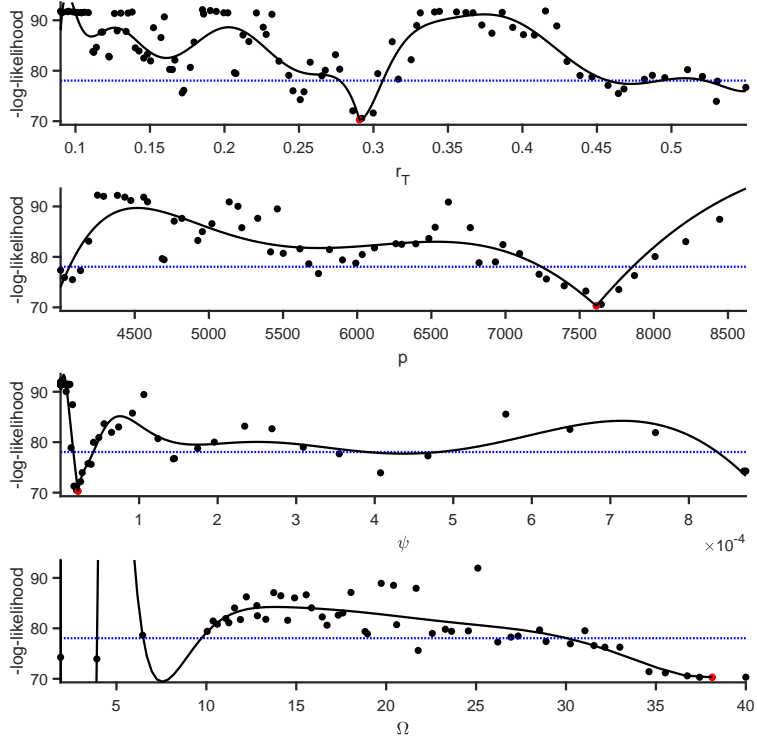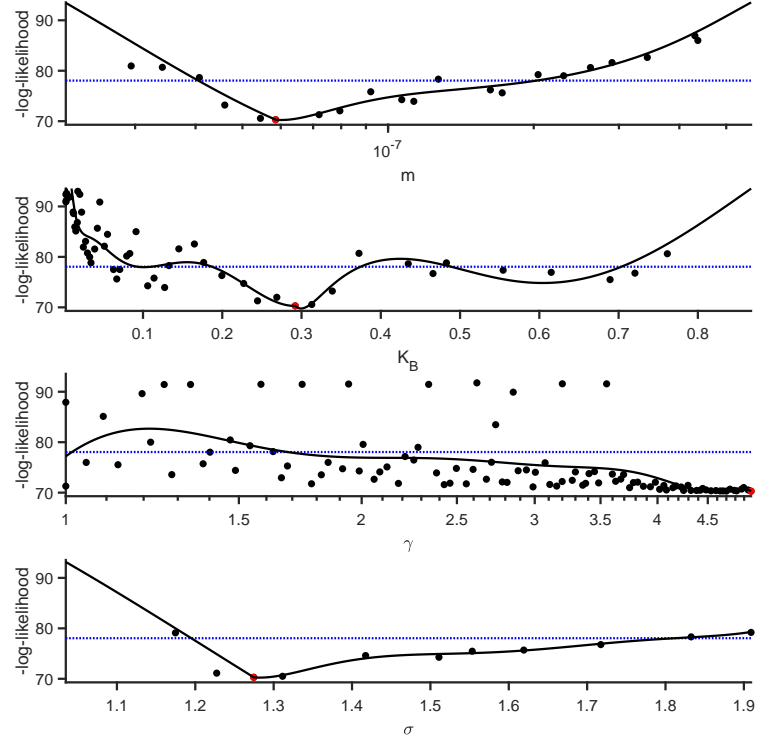

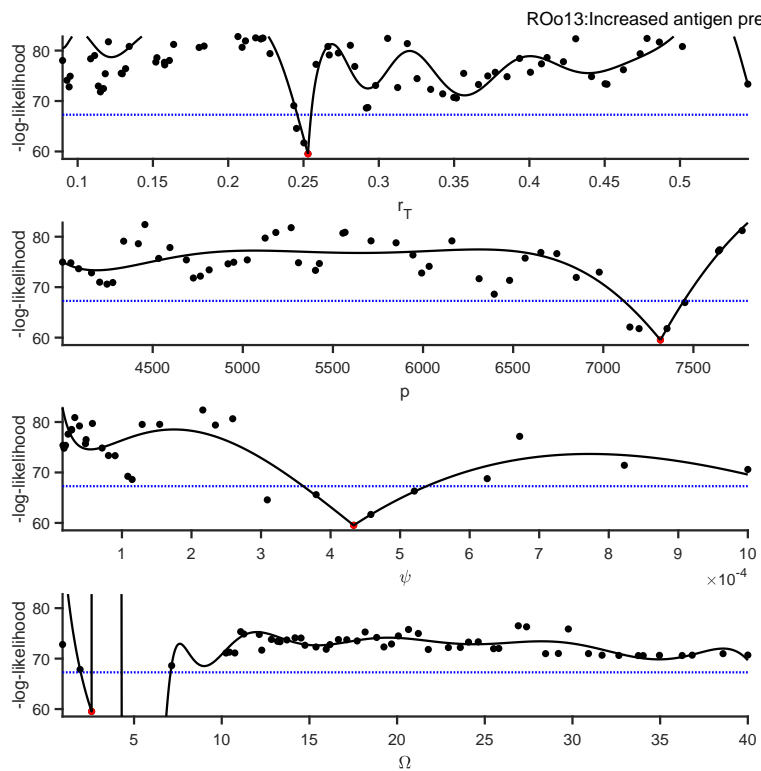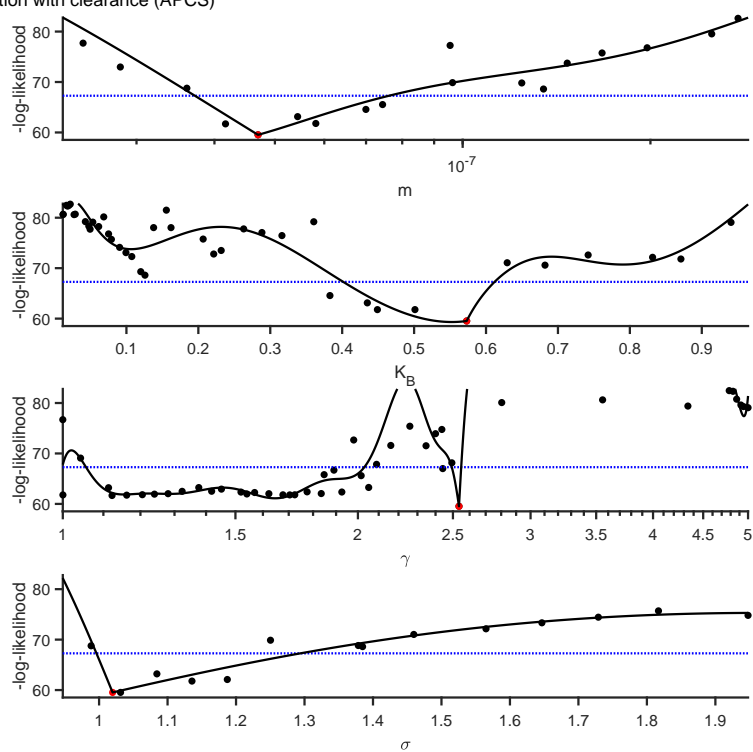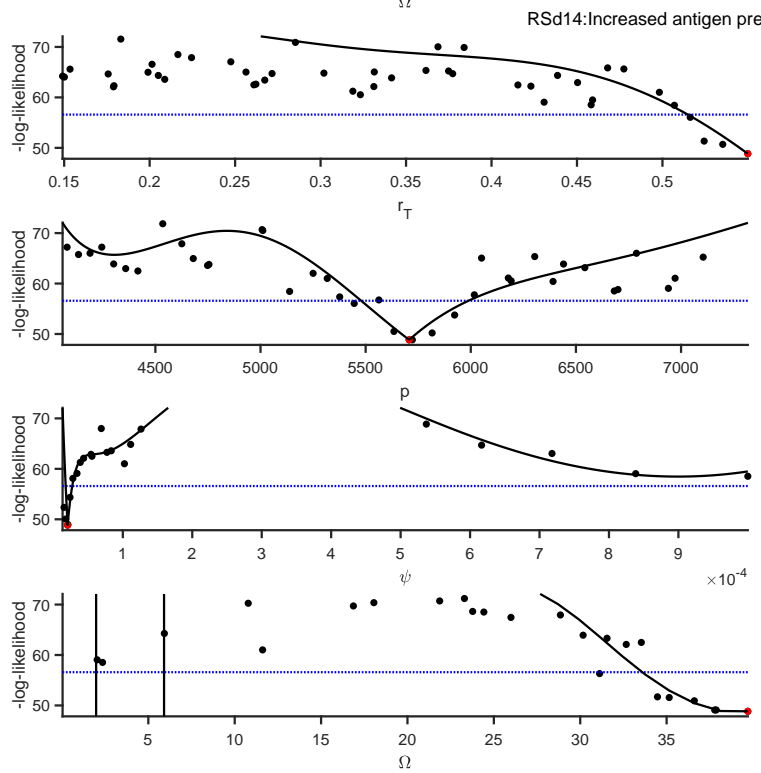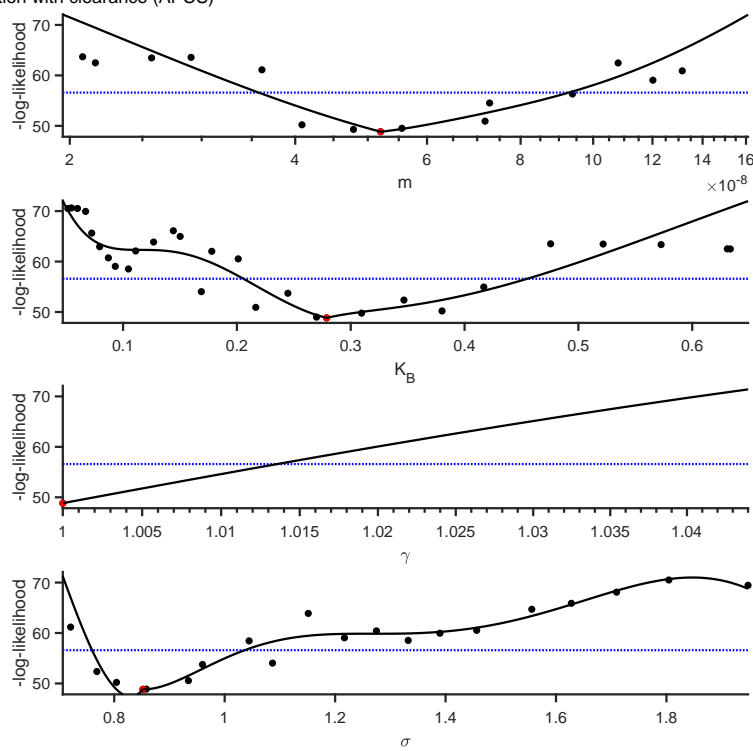

ROV14: Increased antigen presentation with clearance (APCS)

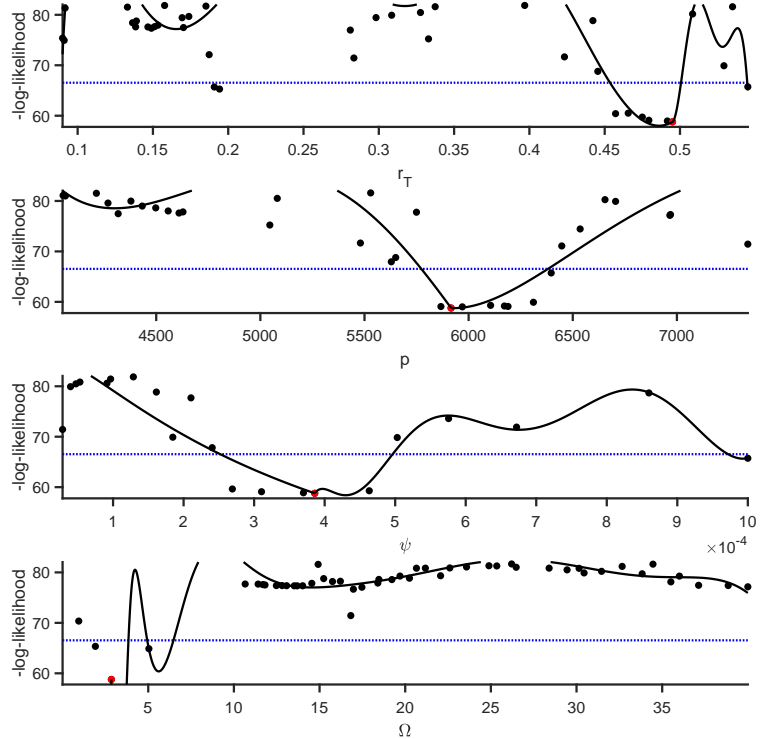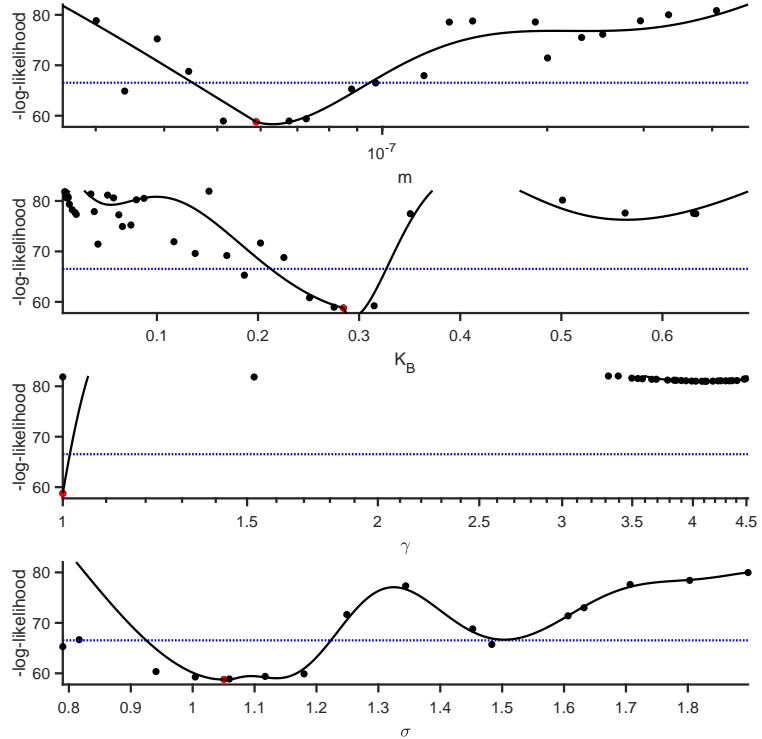

# 12 Sensitivity analysis: Increased antigen presentation with increased viral clearance

## 12.1 Baseline effector cell source model

ROq14: Increased antigen presentation with clearance (BL)

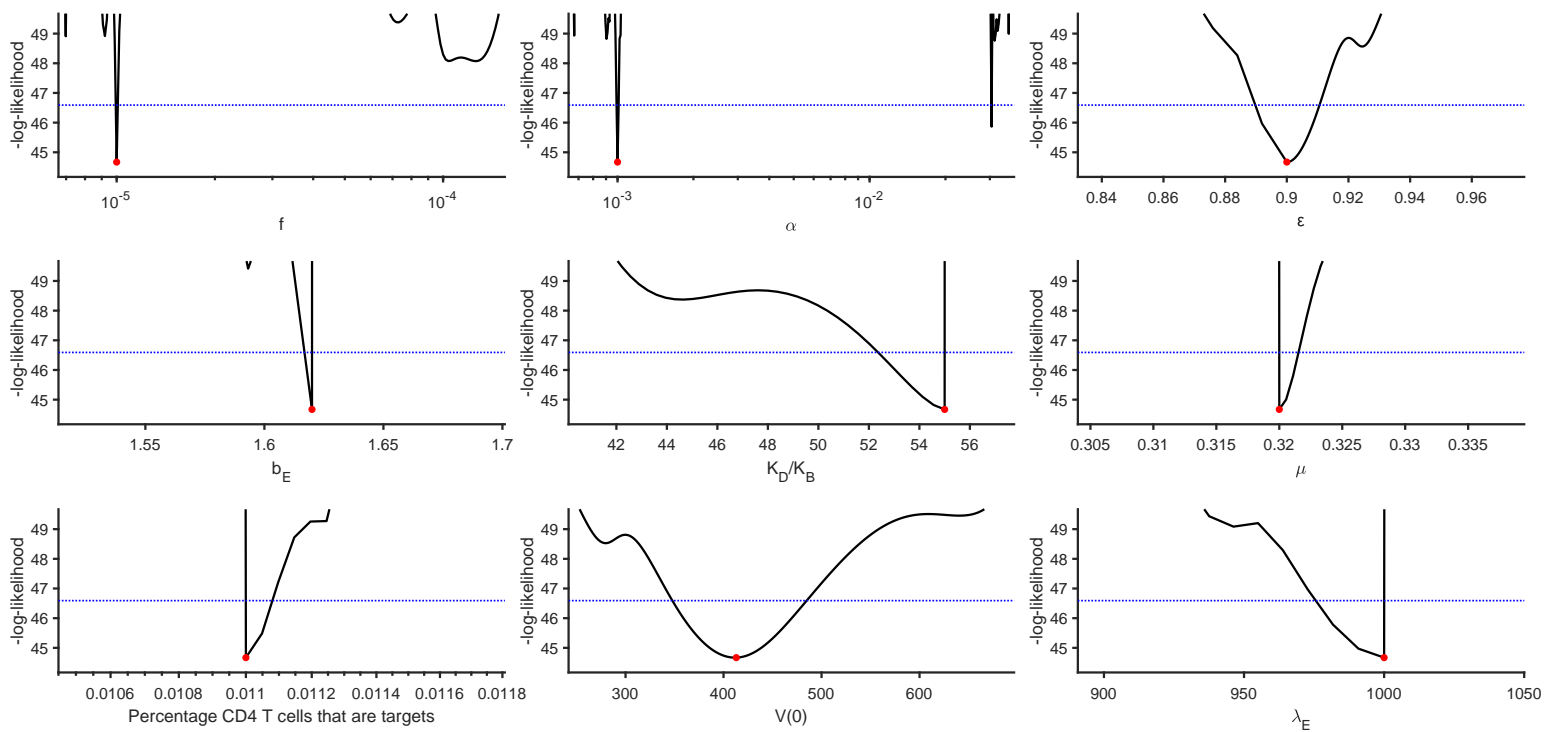



RDa15: Increased antigen presentation with clearance (BL)

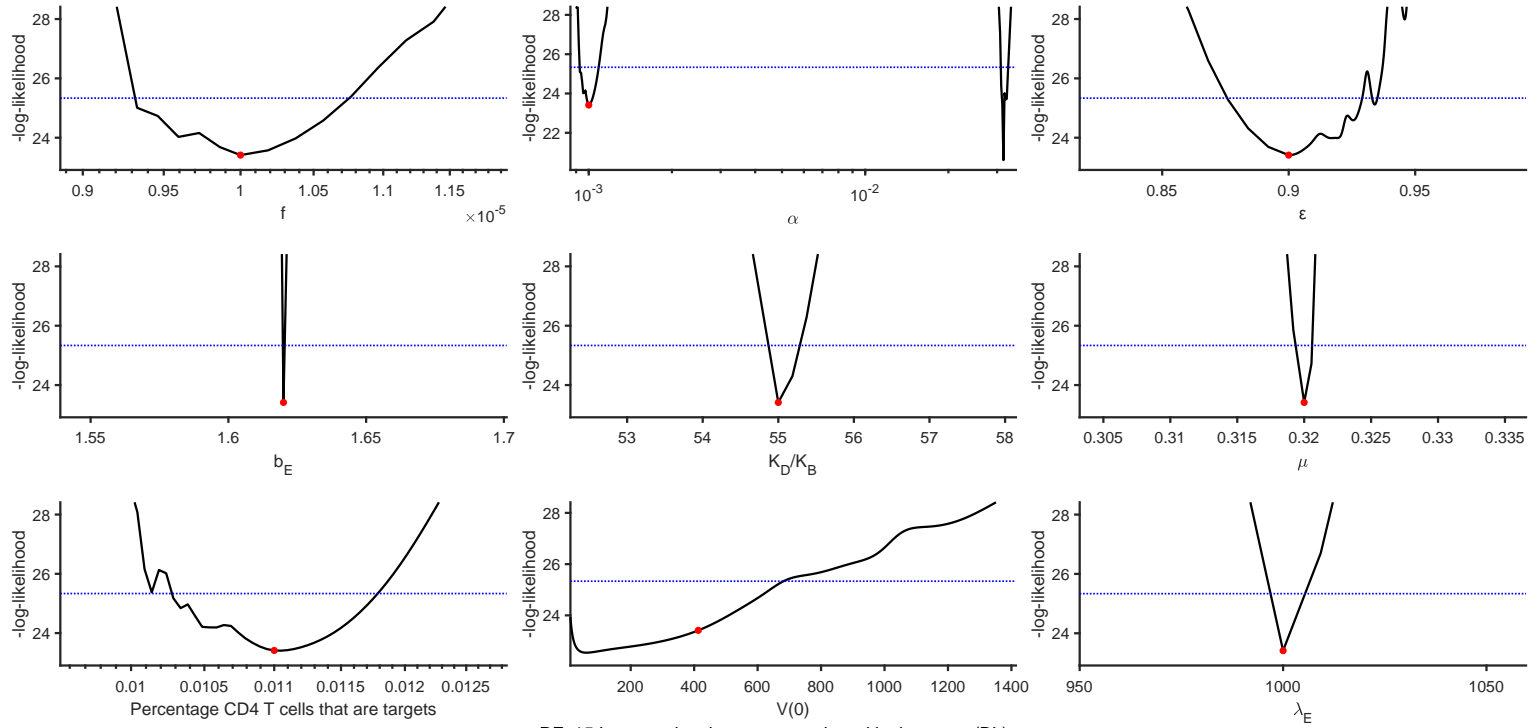

RFa15: Increased antigen presentation with clearance (BL)

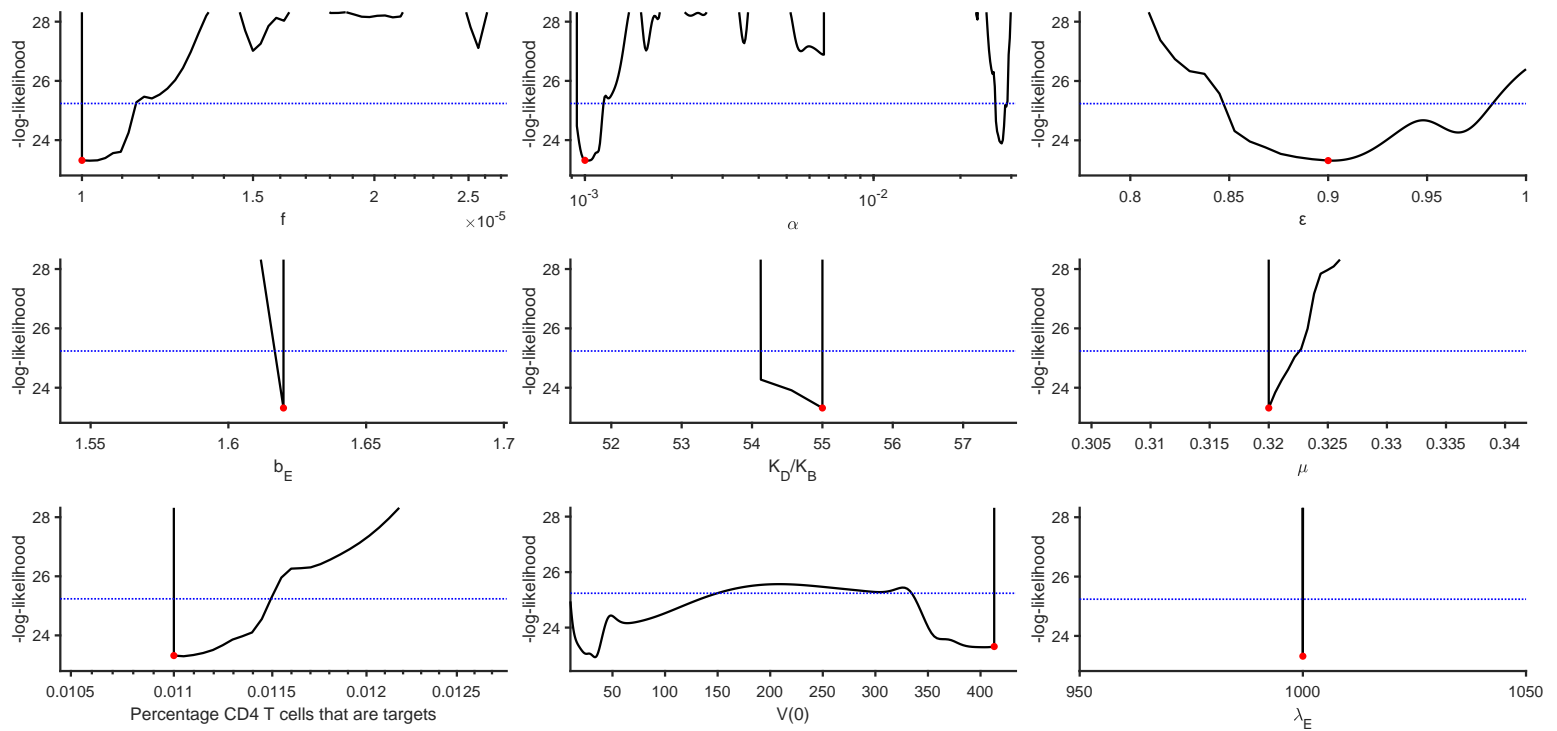

RLn12: Increased antigen presentation with clearance (BL)

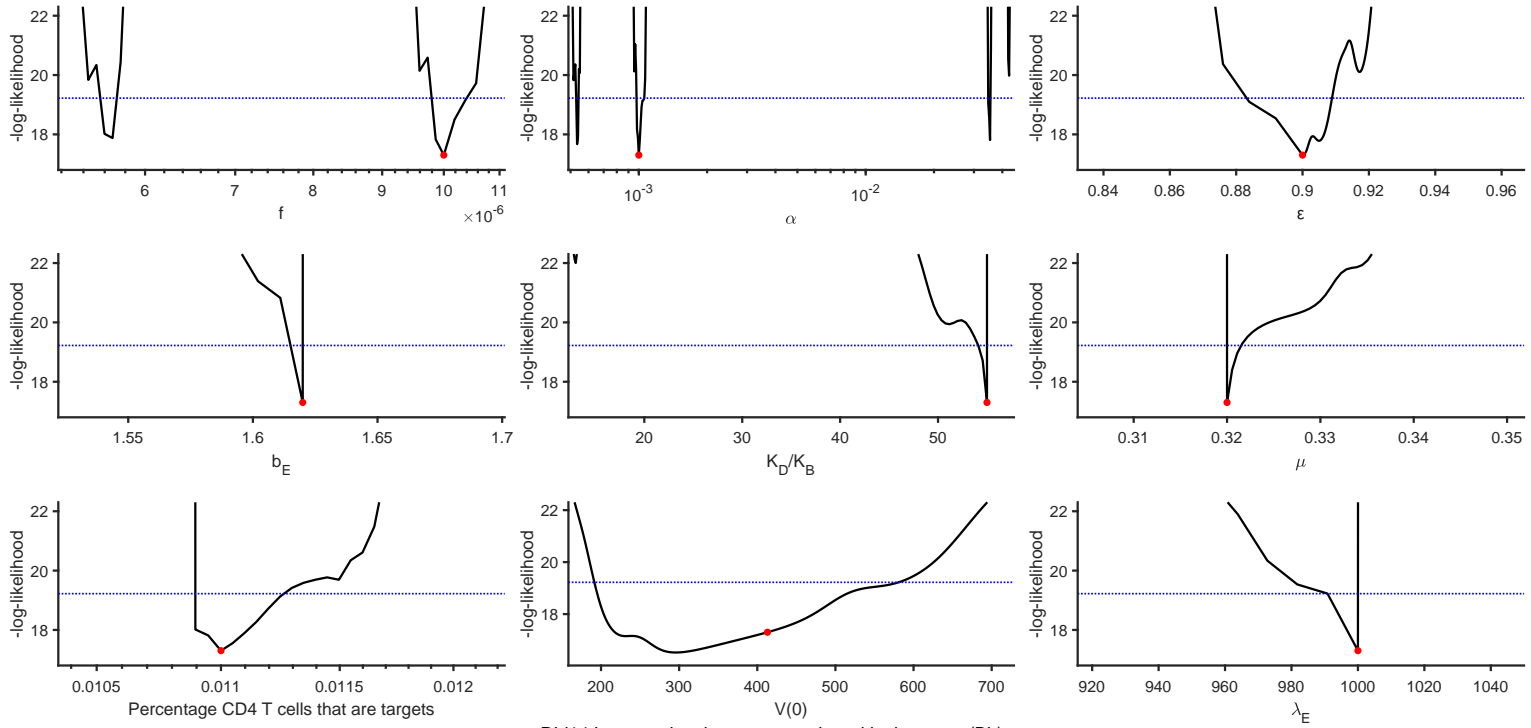

Rld14: Increased antigen presentation with clearance (BL)

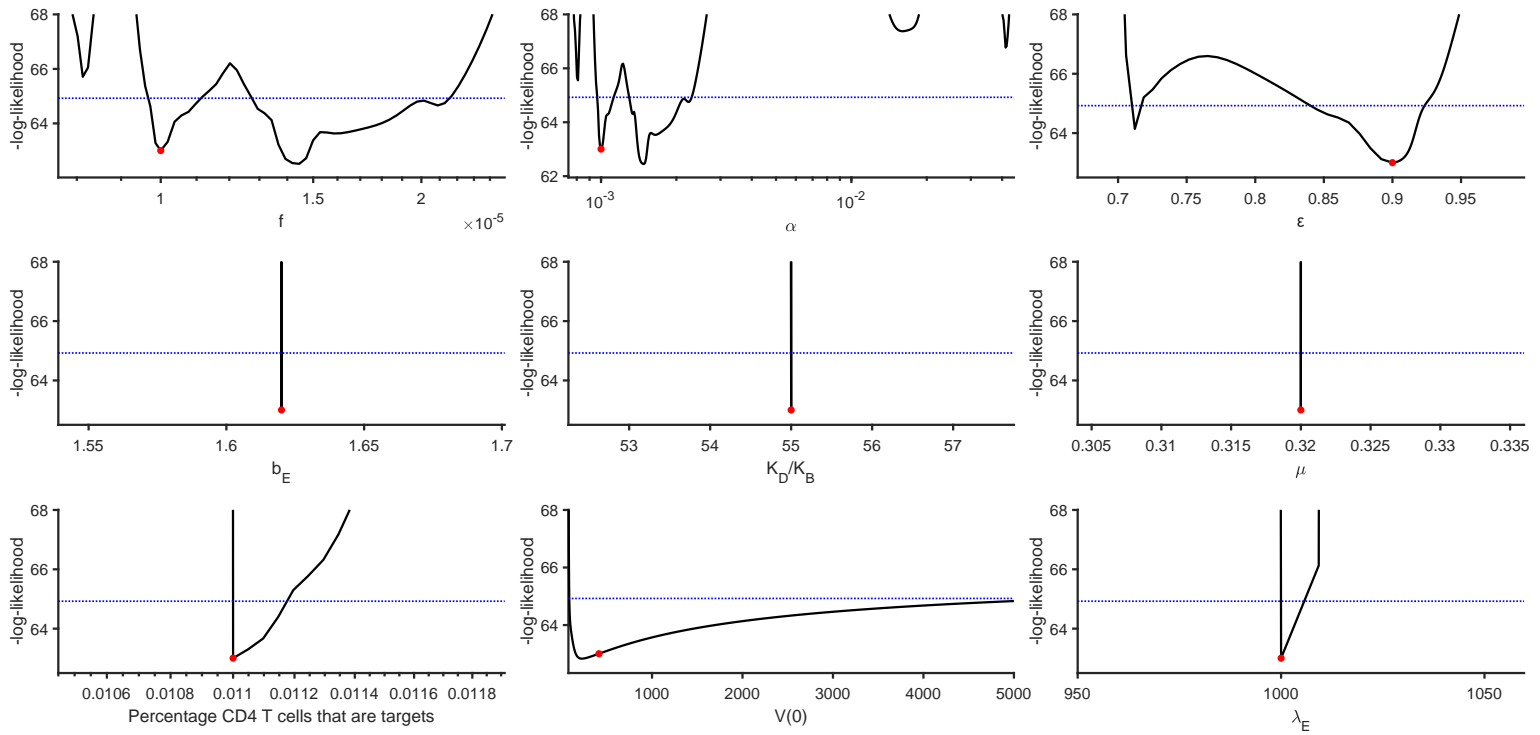

ROo13: Increased antigen presentation with clearance (BL)

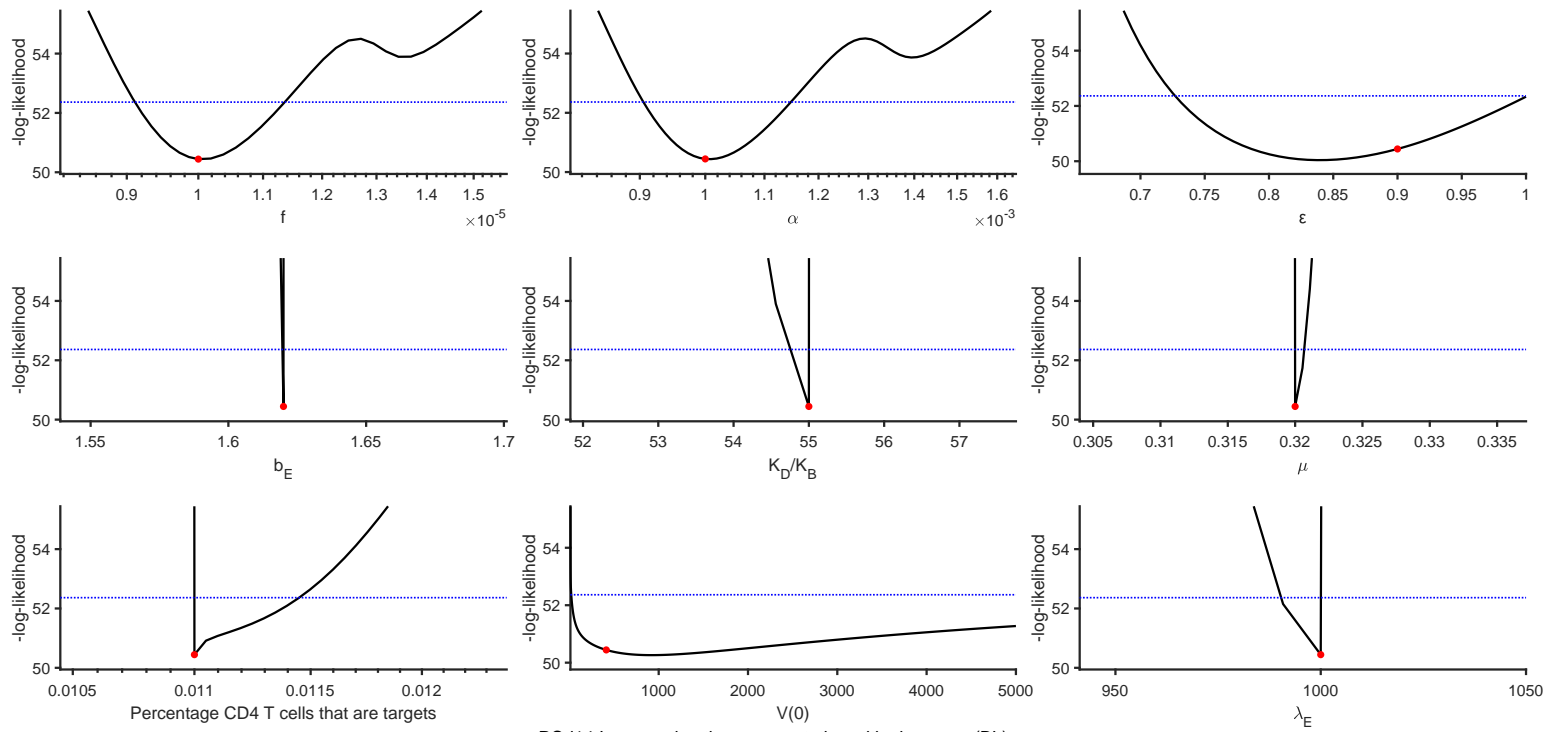

RSd14: Increased antigen presentation with clearance (BL)

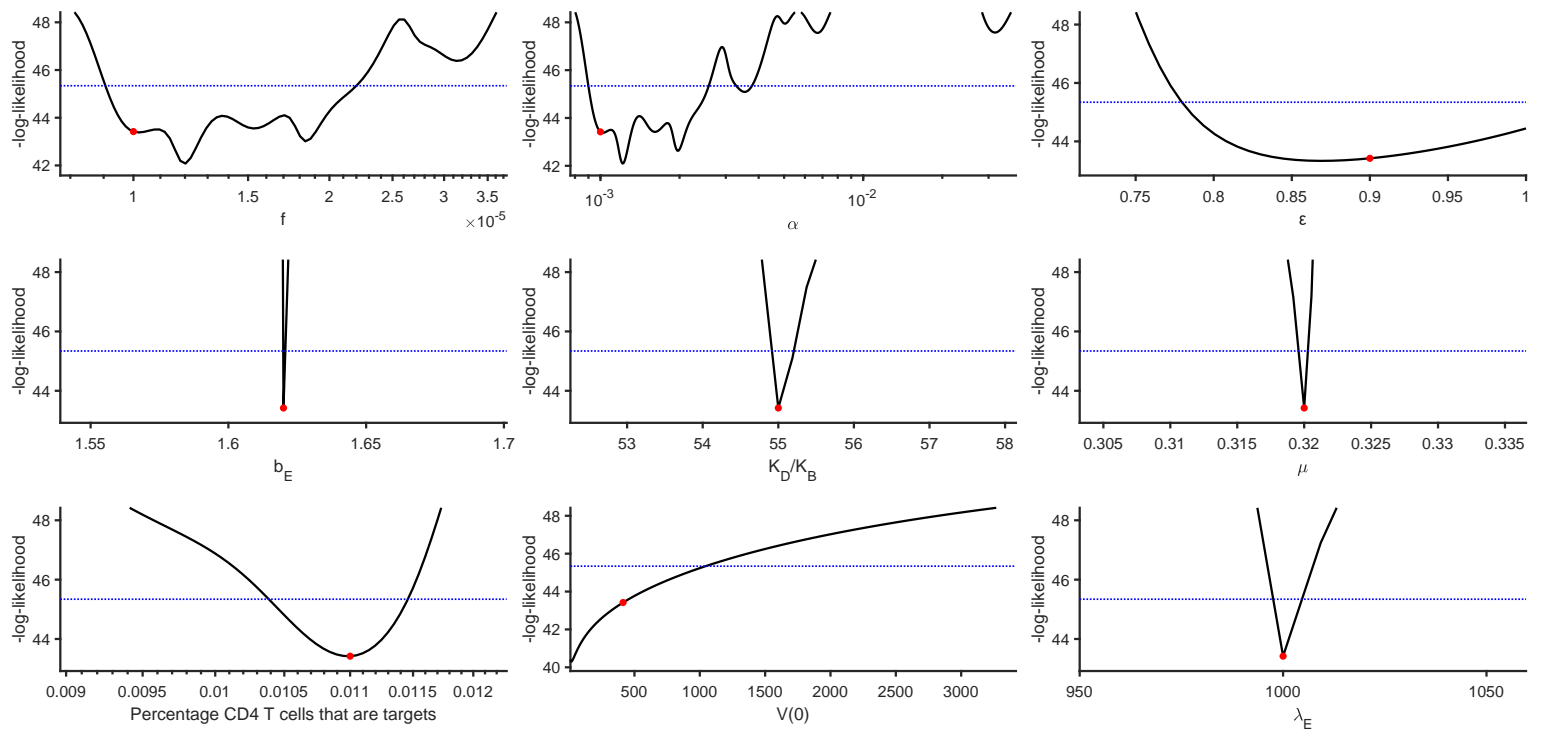

ROV14: Increased antigen presentation with clearance (BL)

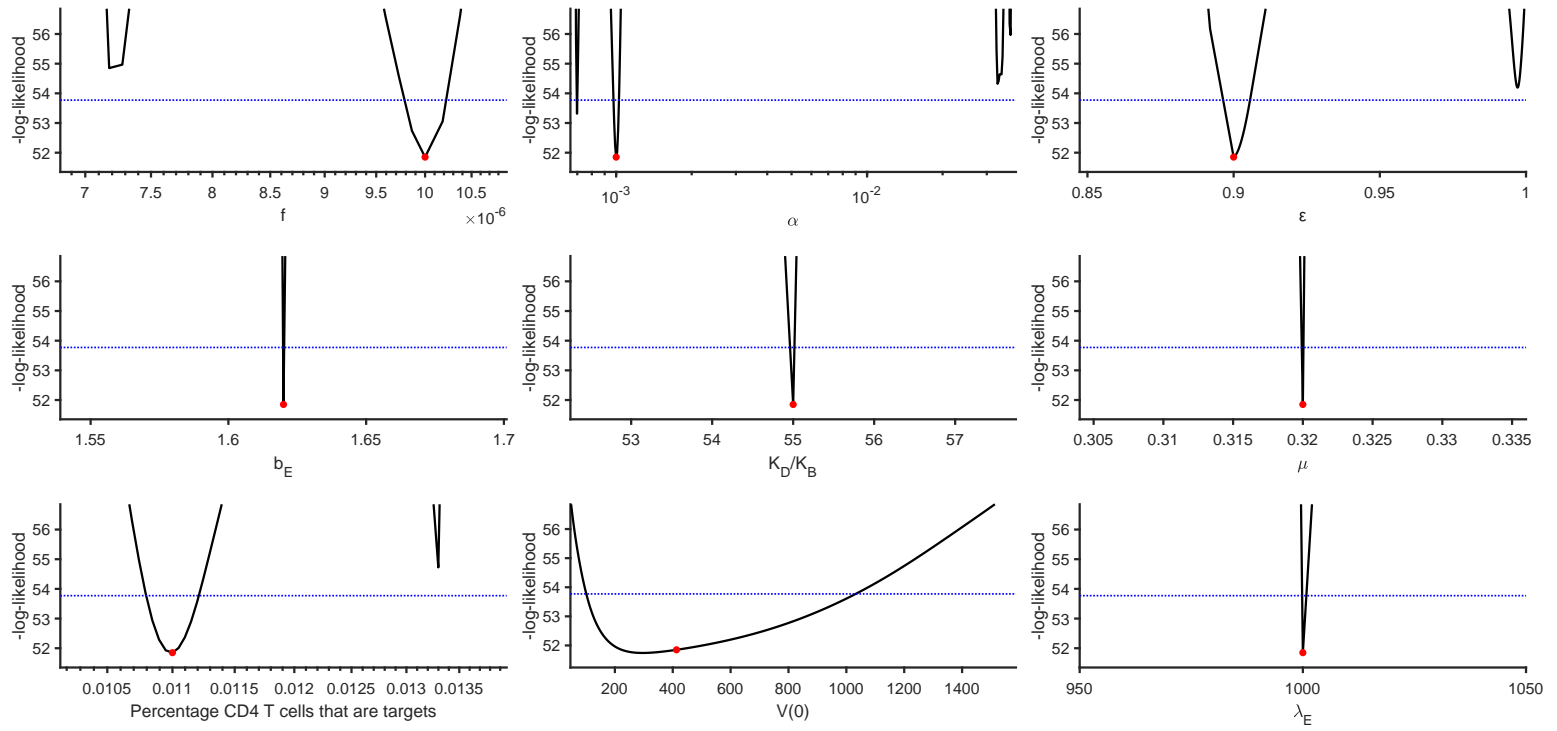

## 12.2 Saturated effector cell source model

ROq14: Increased antigen presentation with clearance (SS)

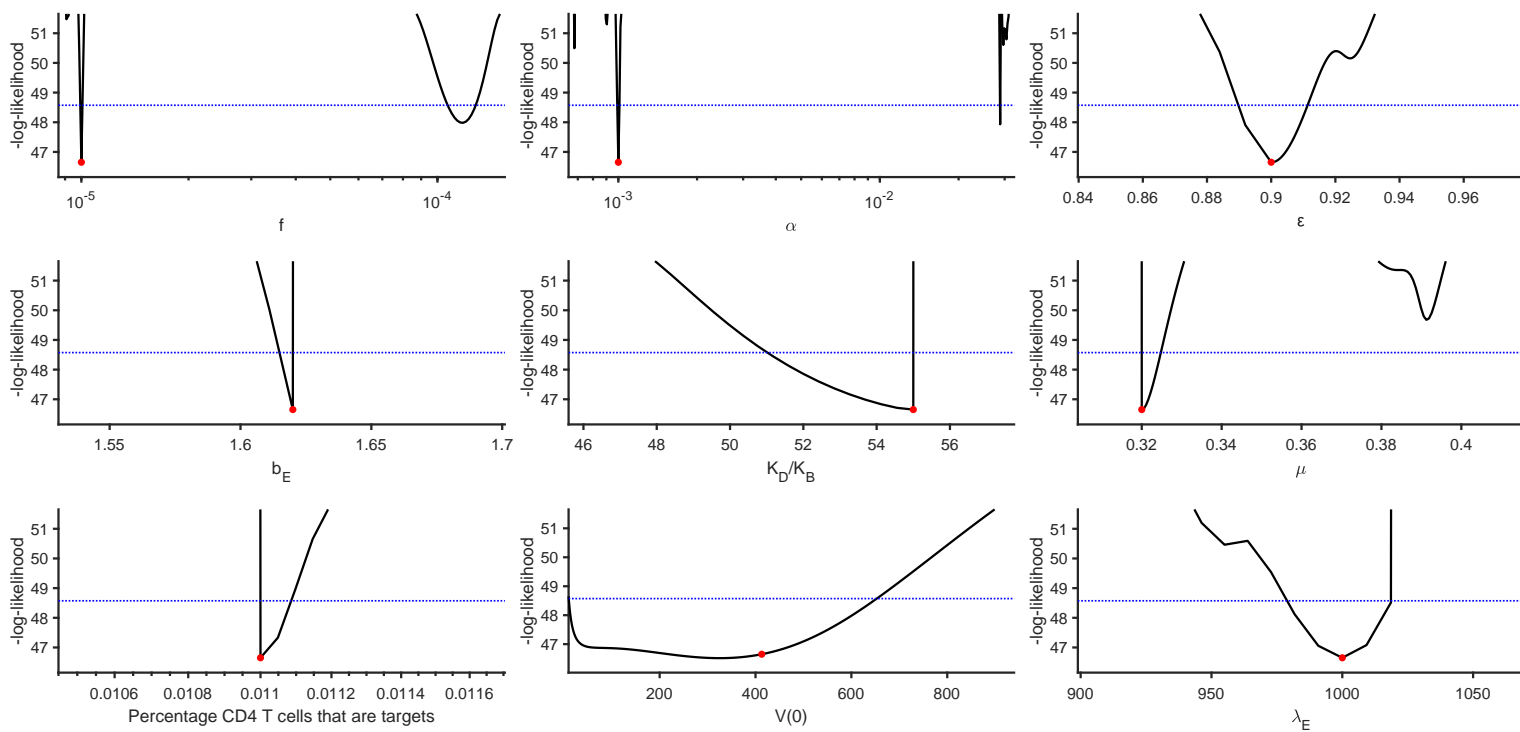

RDa15: Increased antigen presentation with clearance (SS)

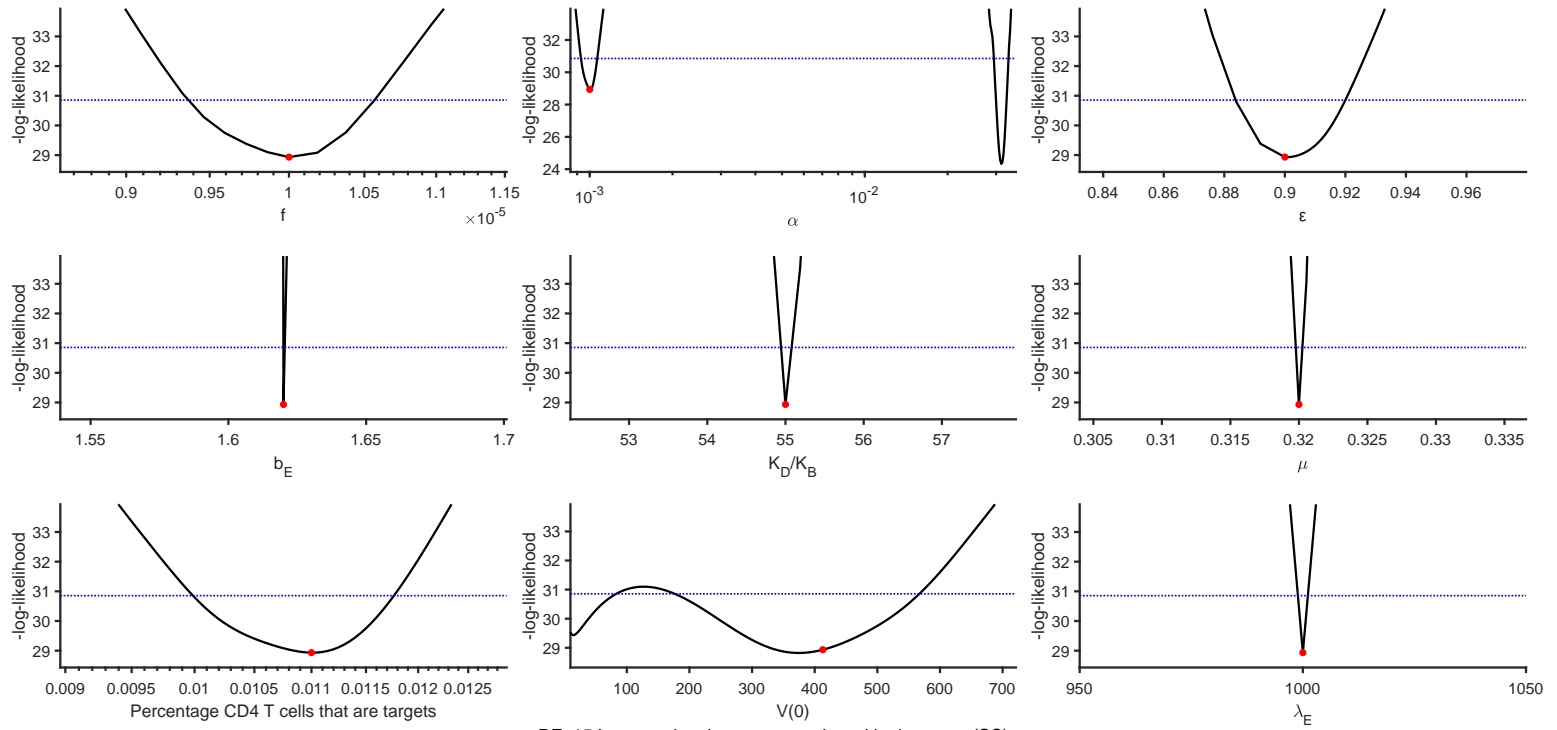

RFa15: Increased antigen presentation with clearance (SS)

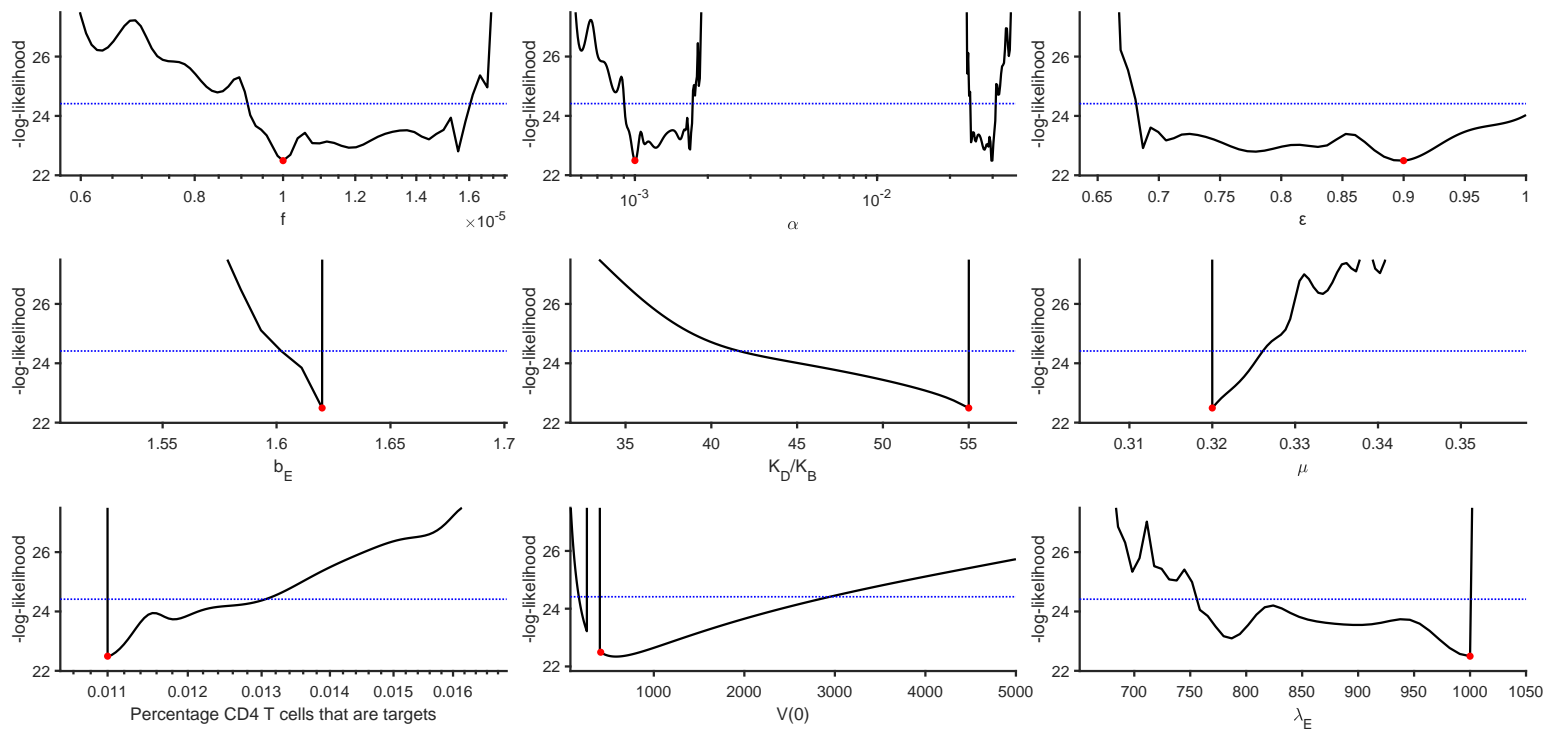

RLn12: Increased antigen presentation with clearance (SS)

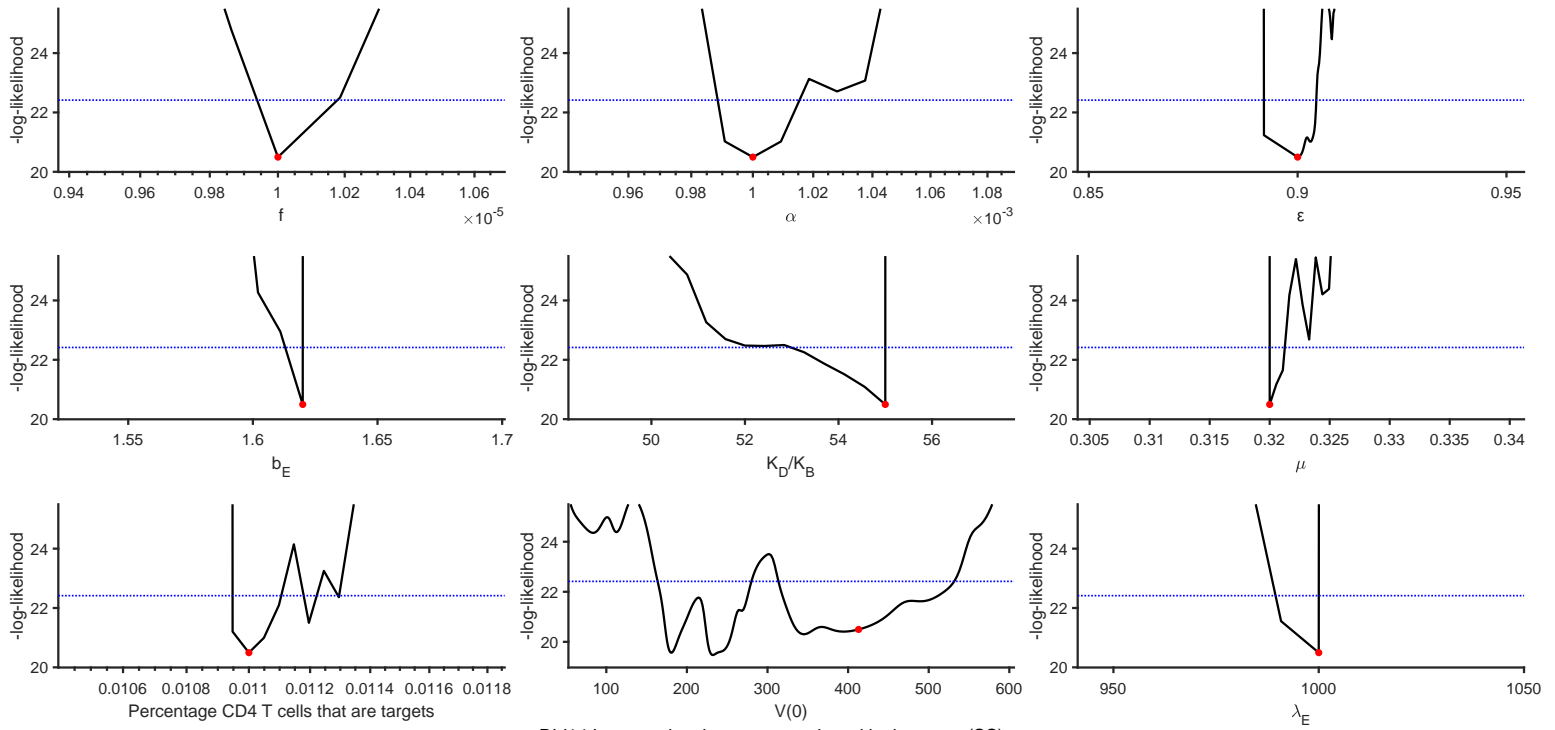

Rld14: Increased antigen presentation with clearance (SS)

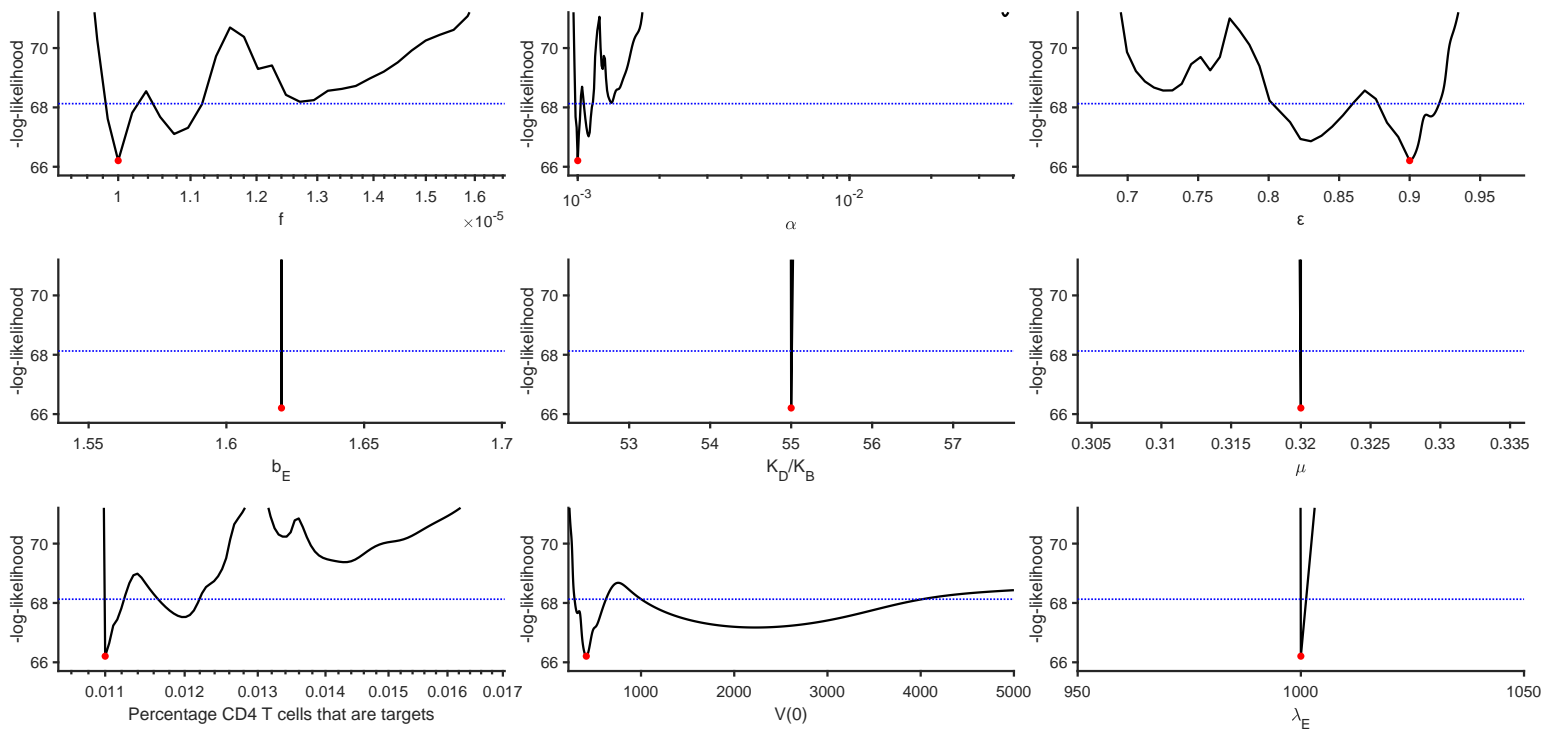

ROo13: Increased antigen presentation with clearance (SS)

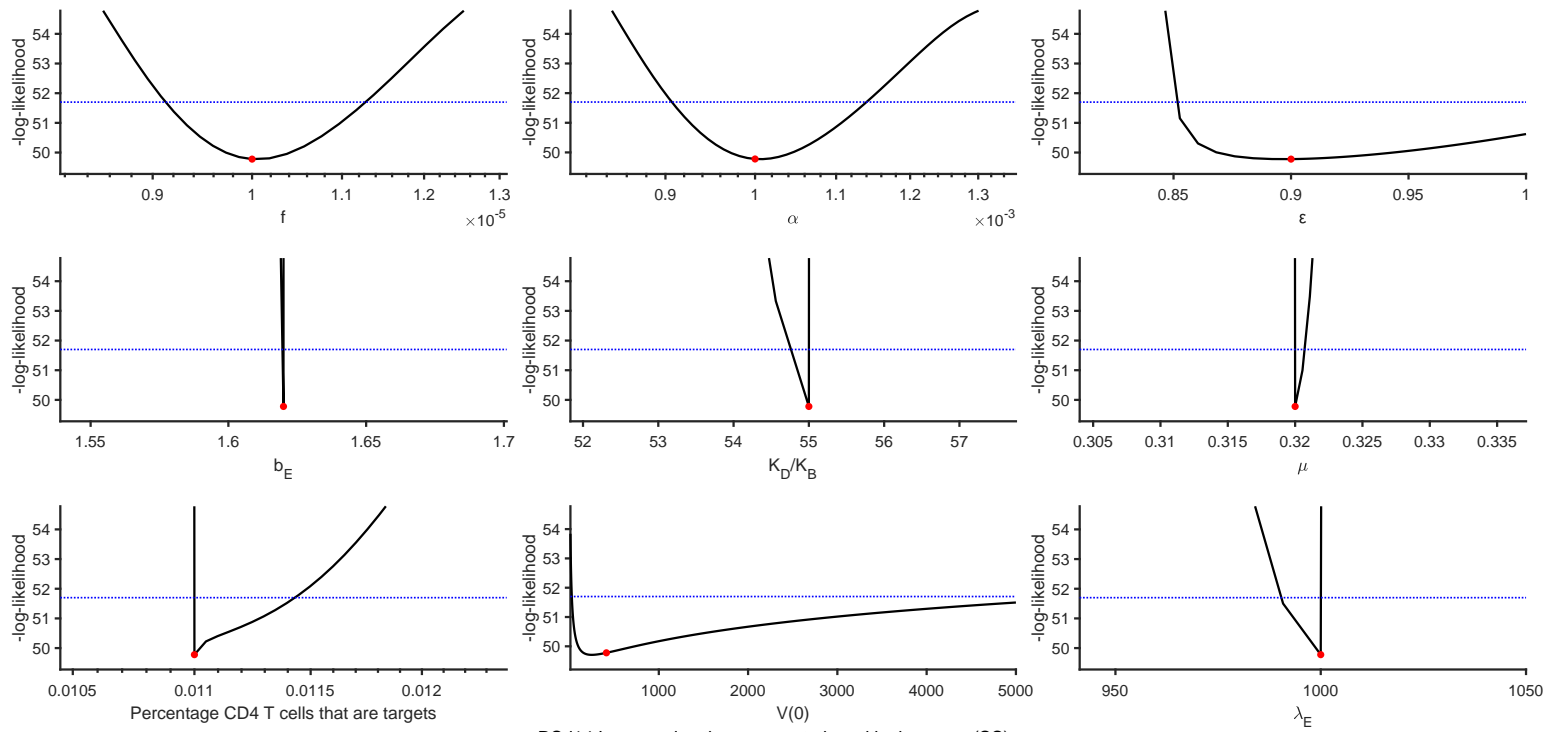

RSd14: Increased antigen presentation with clearance (SS)

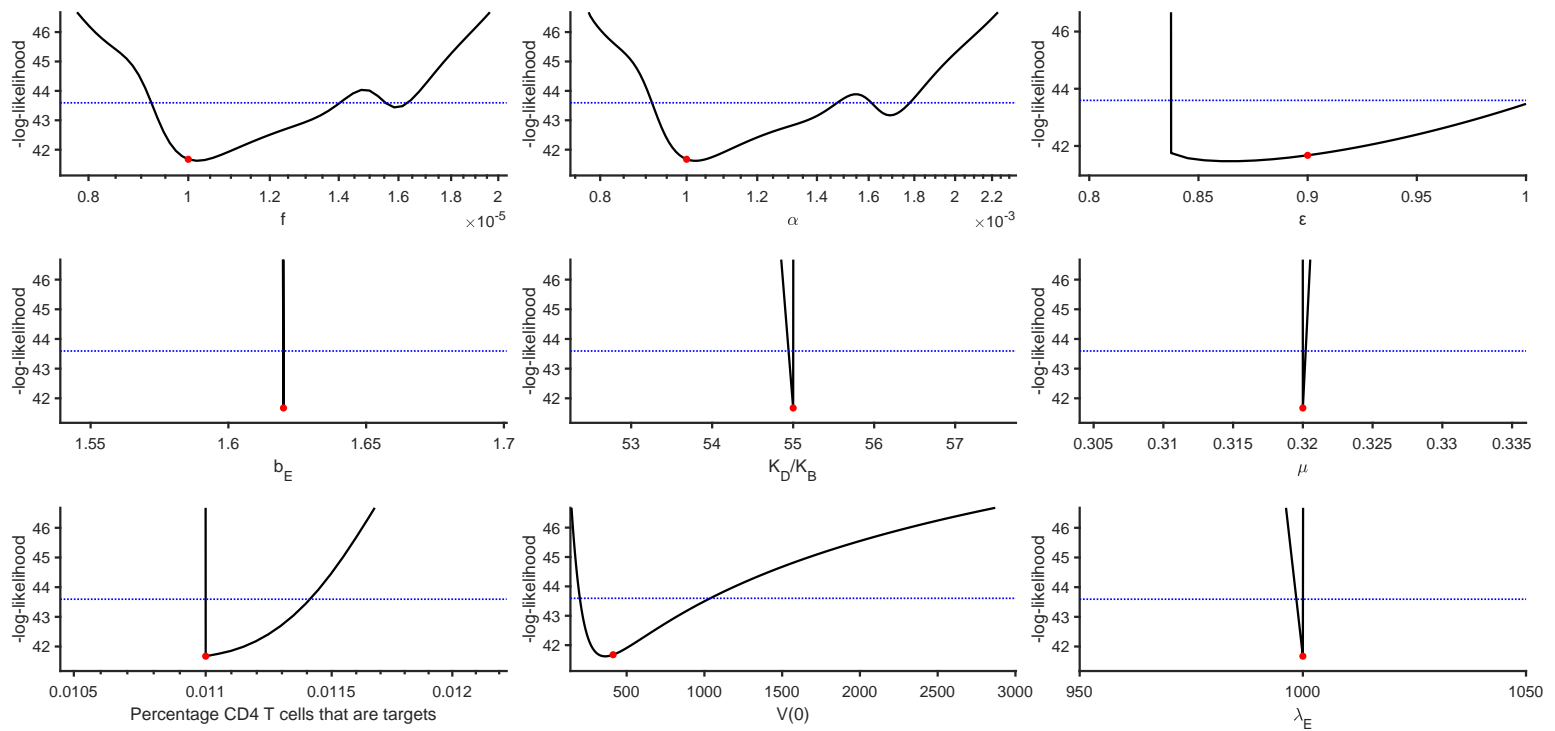



ROV14: Increased antigen presentation with clearance (SS)

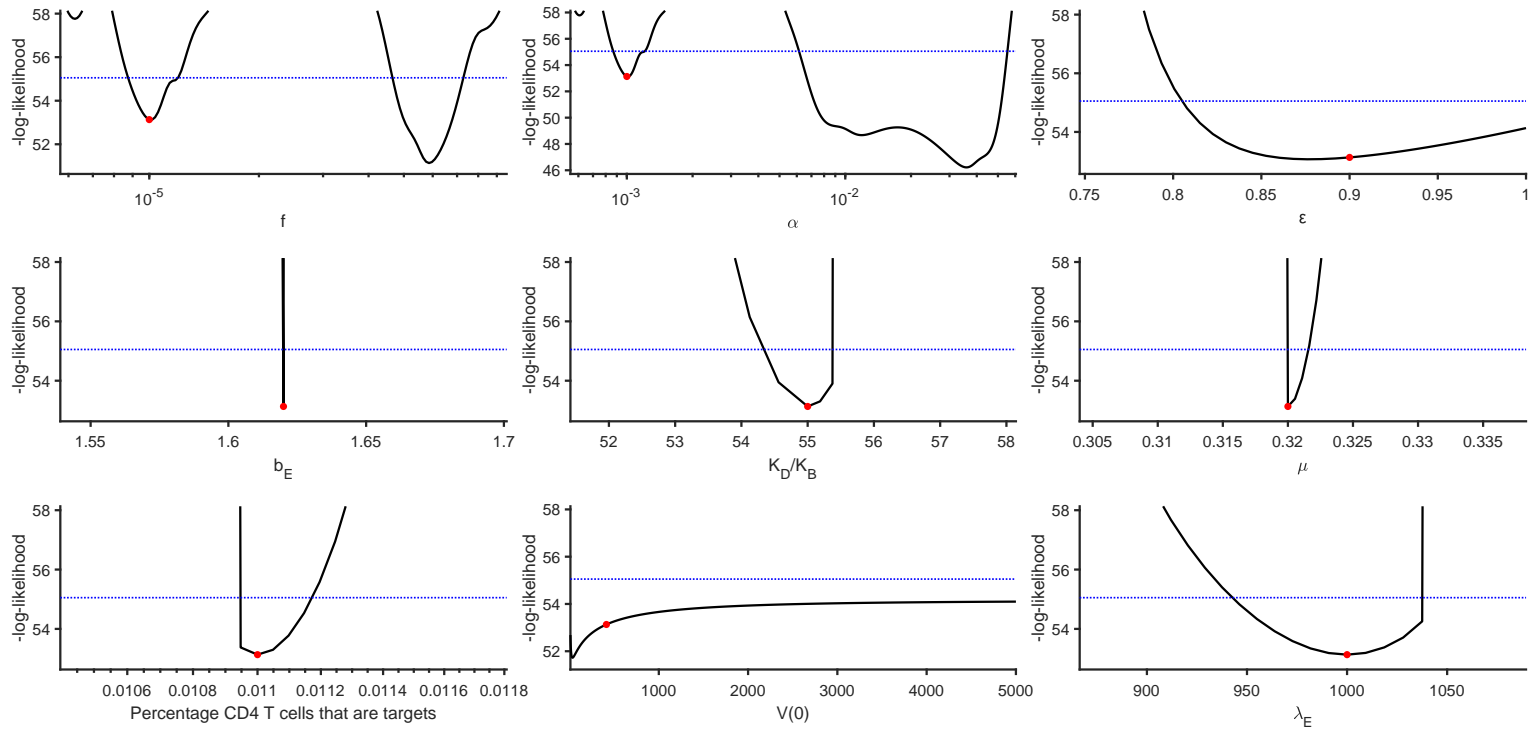

## 12.3 Antigen presenting cell effector cell source model

ROq14: Increased antigen presentation with clearance (APCS)

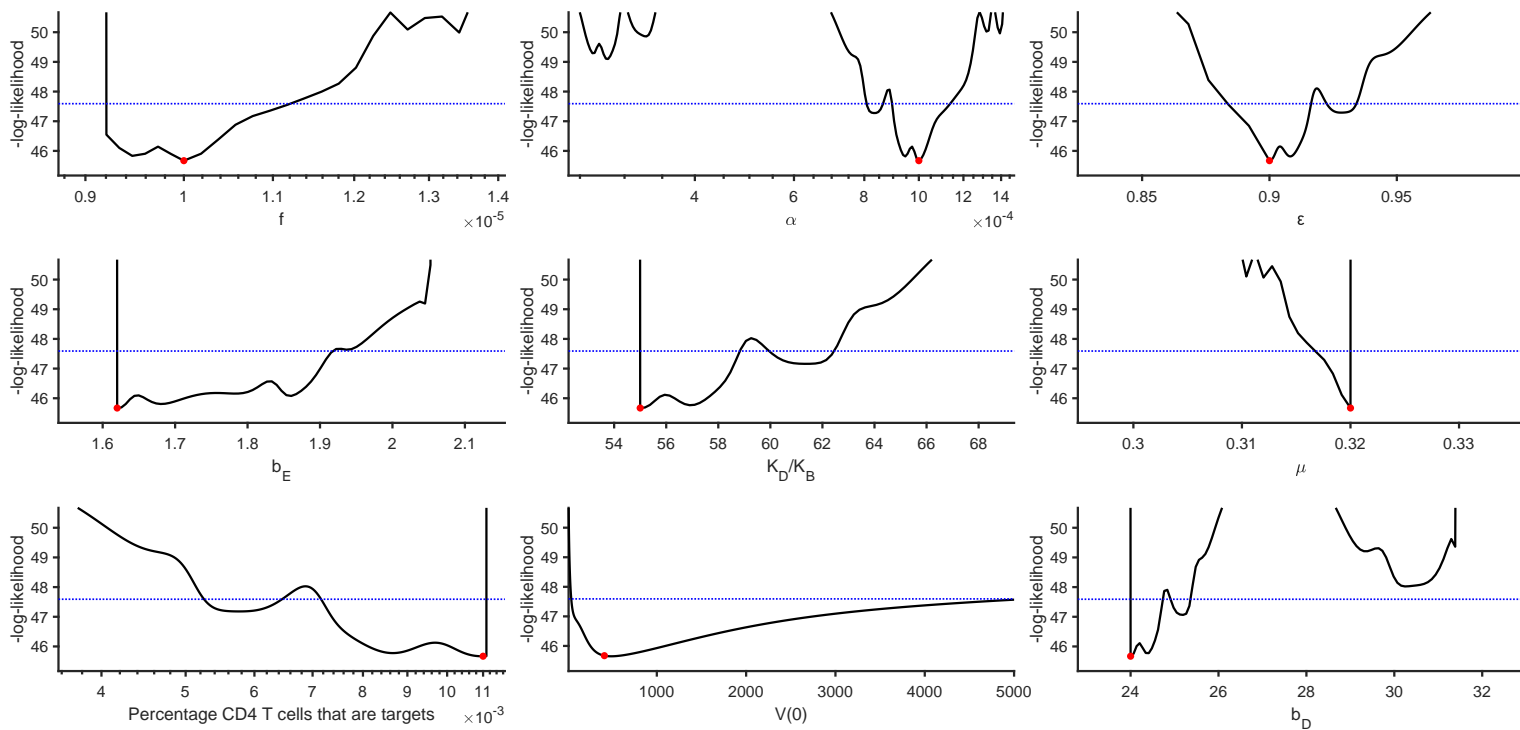

RDa15: Increased antigen presentation with clearance (APCS)

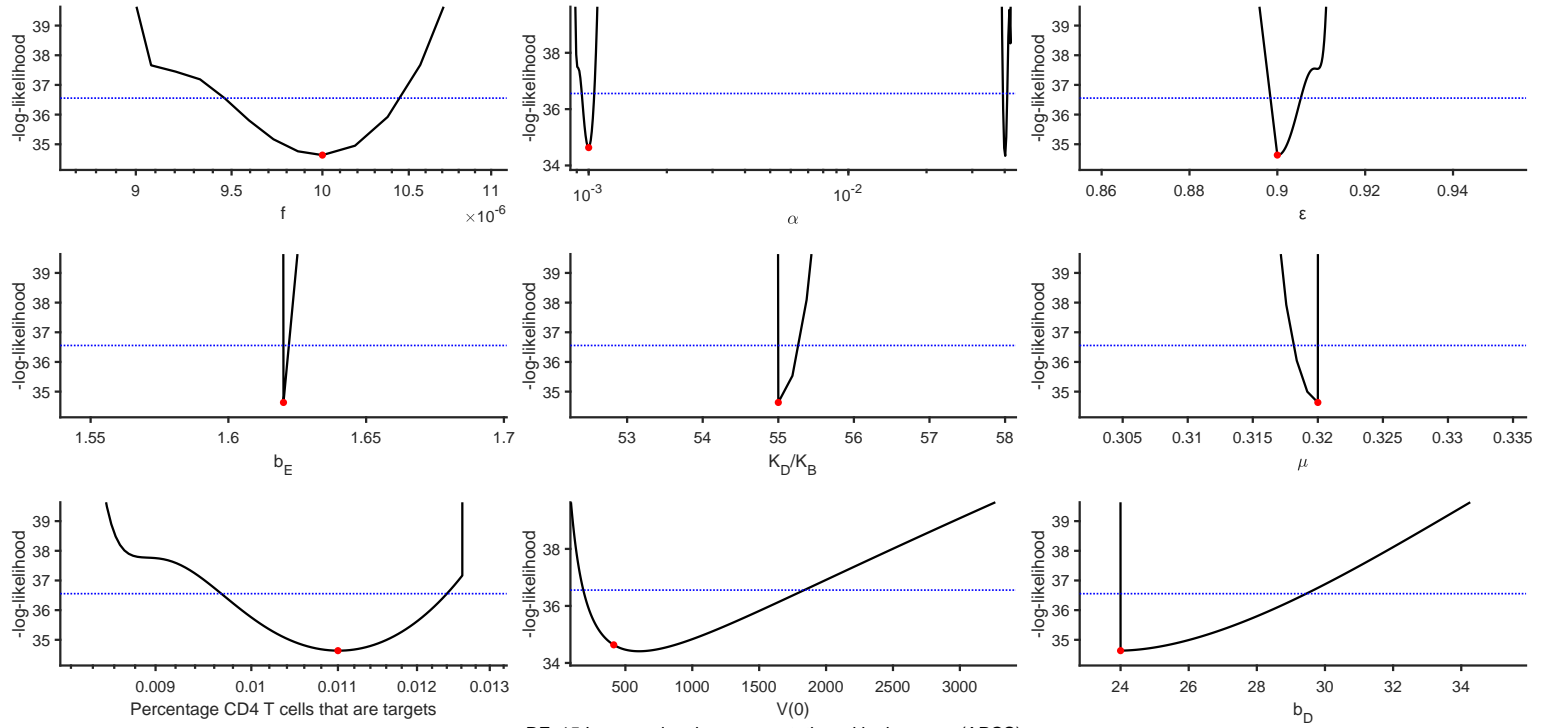

RFa15: Increased antigen presentation with clearance (APCS)

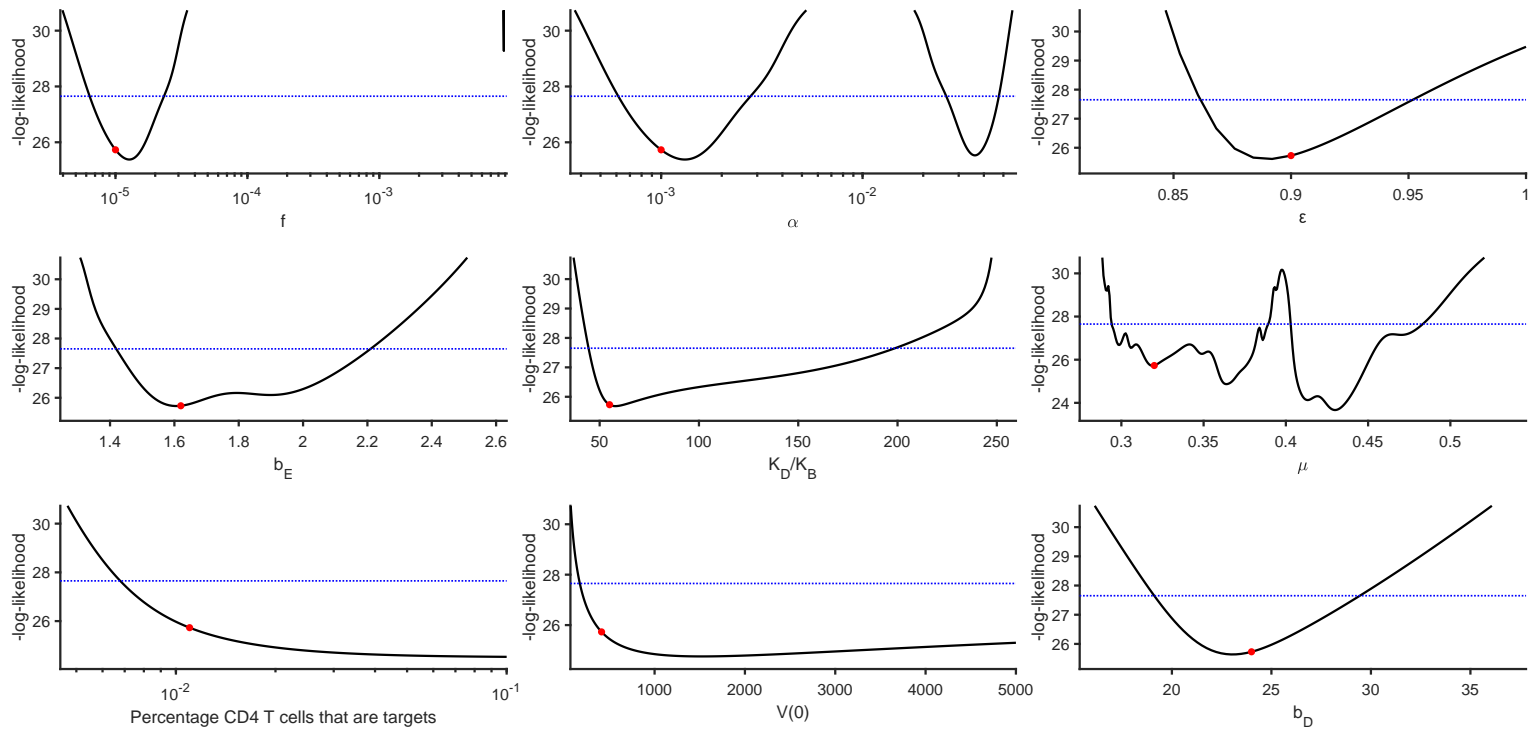

RLn12: Increased antigen presentation with clearance (APCS)

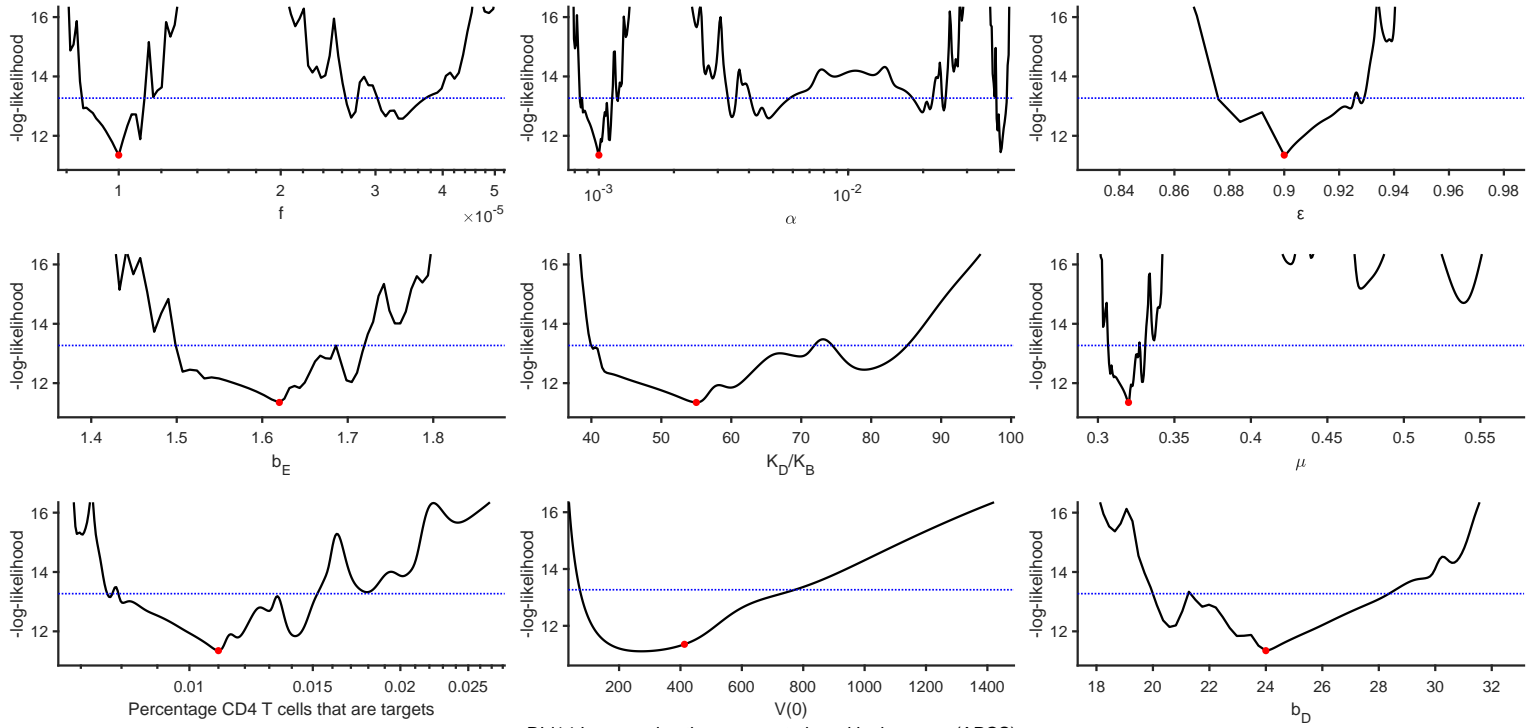

Rl14: Increased antigen presentation with clearance (APCS)

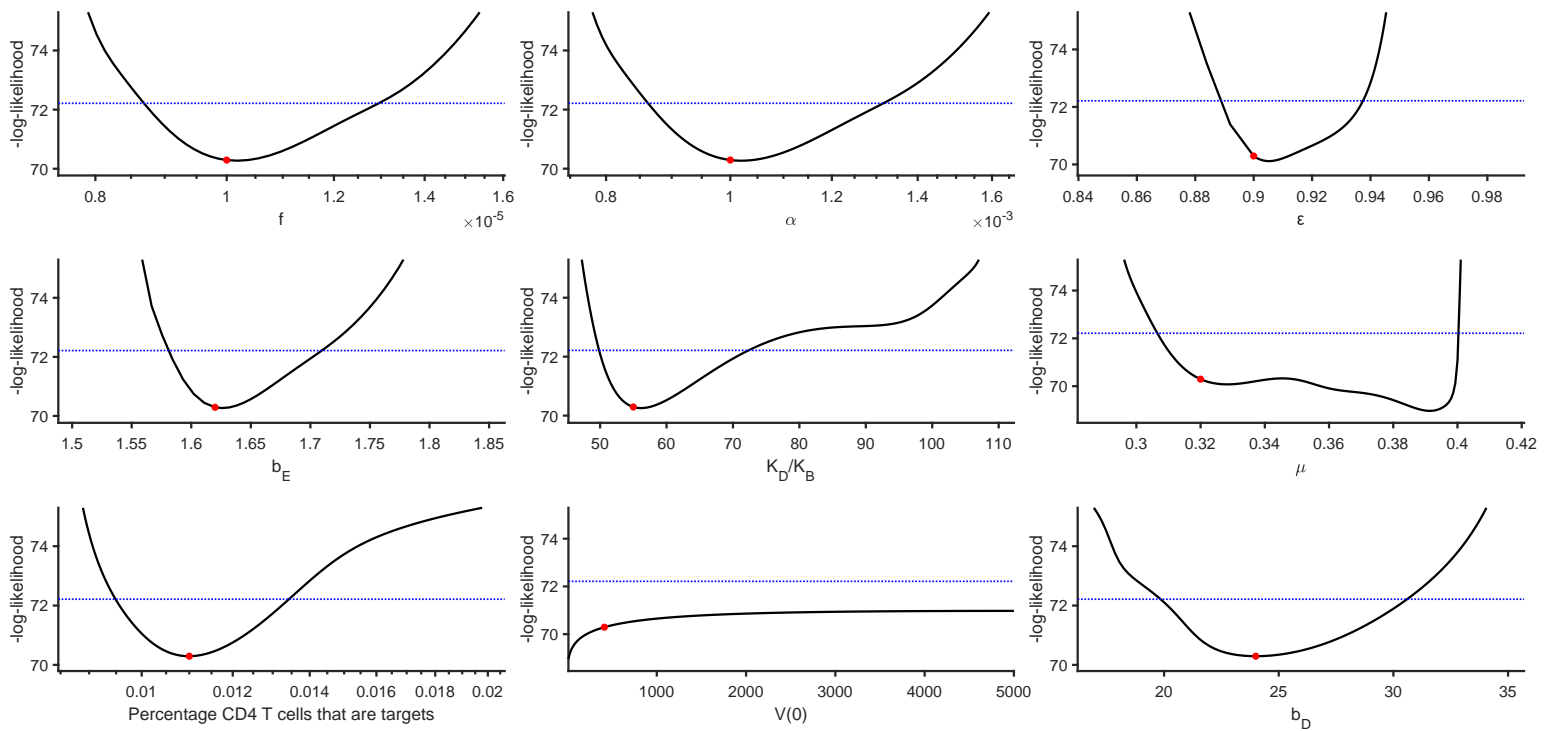

ROo13: Increased antigen presentation with clearance (APCS)

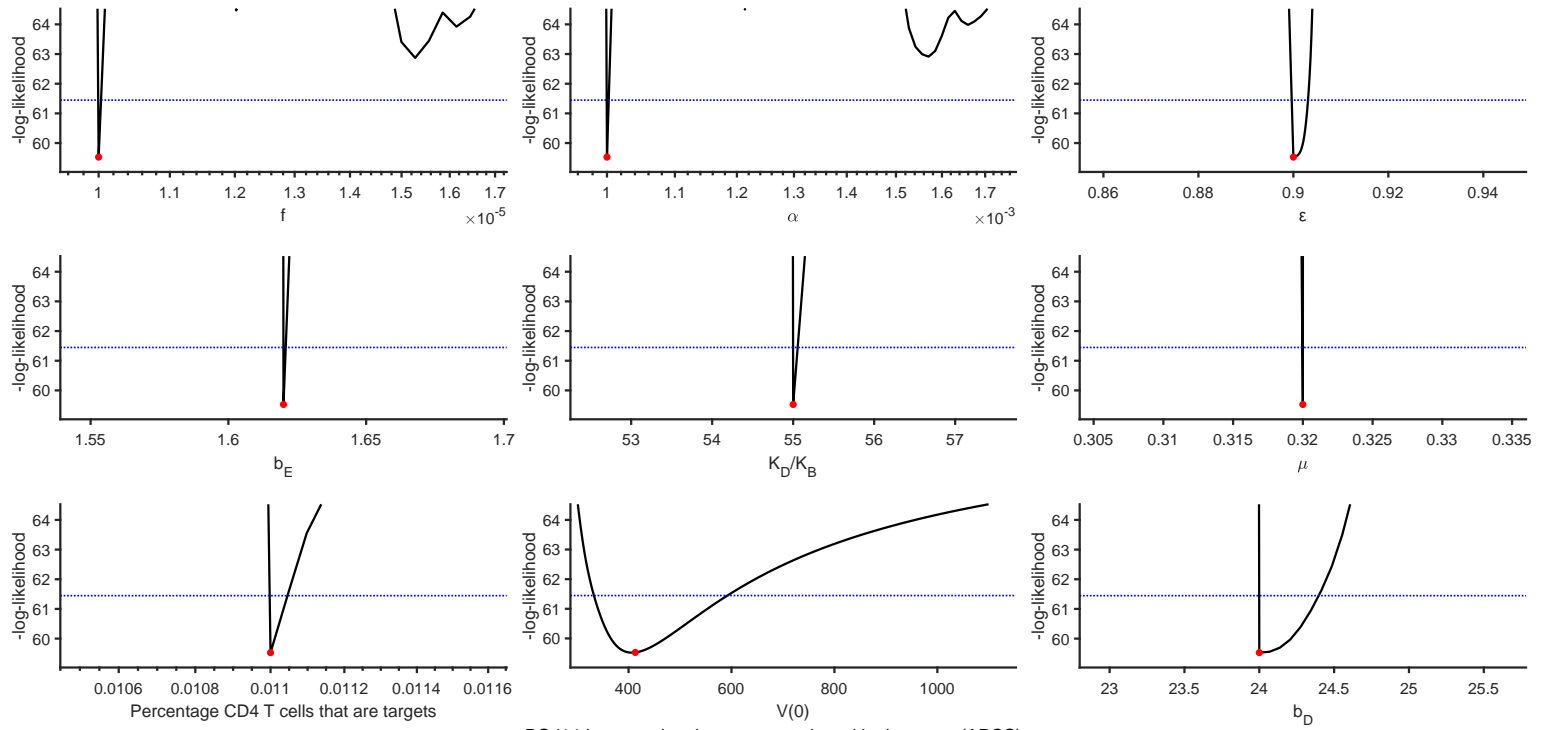

RSd14: Increased antigen presentation with clearance (APCS)

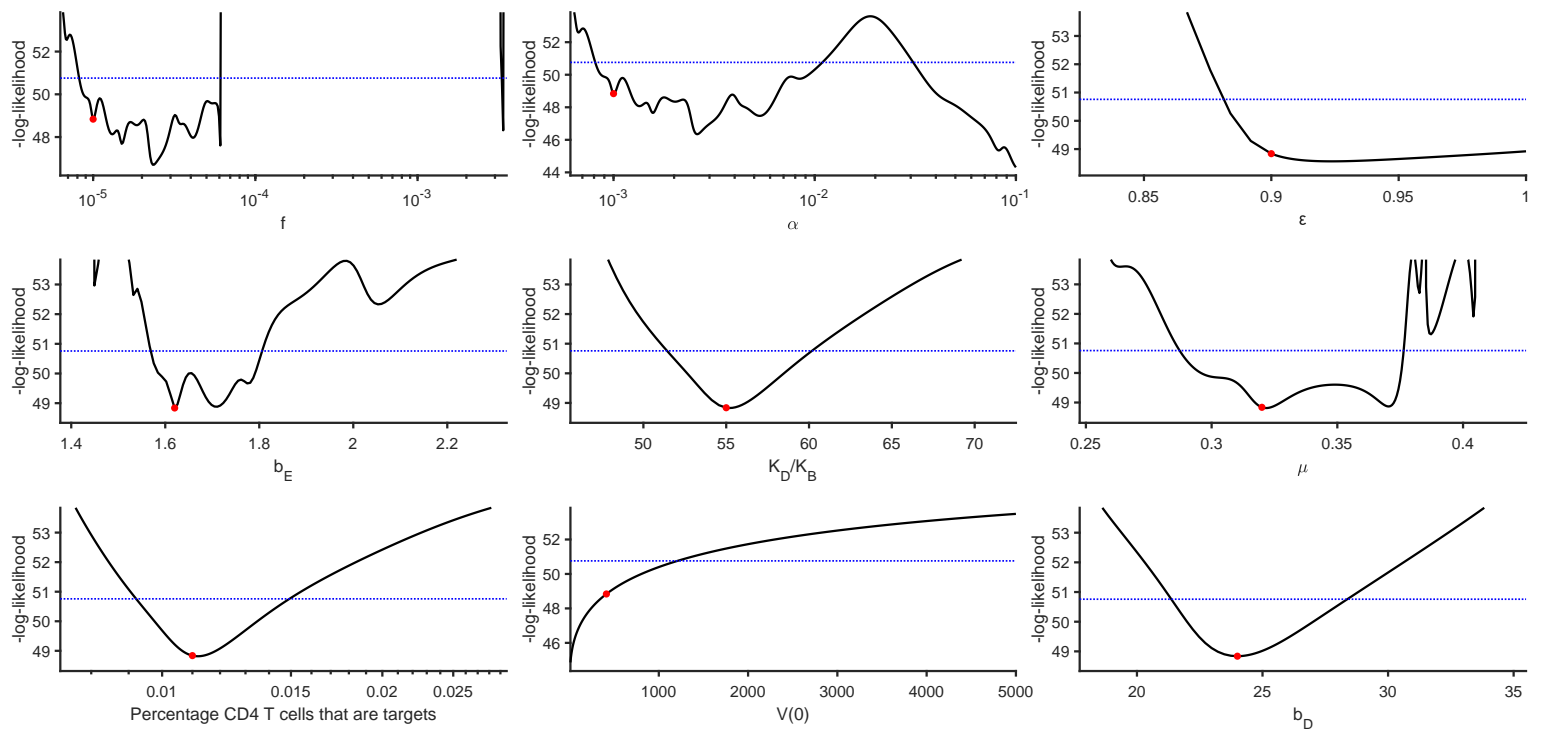

ROv14: Increased antigen presentation with clearance (APCS)



Supplement: pcbi.1009031.s003.pdf [file pcbi.1009031.s003.pdf]
