# Supplementary material for: Mechanistic basis of post-treatment control of SIV after anti-α4β7 antibody therapy
Source: PubMed Central journal article supplement (PMC8189501; doi:10.1371/journal.pcbi.1009031), 2021-06-09
Supplement: pcbi.1009031.s004.pdf [file pcbi.1009031.s004.pdf]

| S1 Table: The aggregated log-likelihood values for the seven control macaques from the primary grid search conducted on the infected cell death rate due to viral cytopathic effects $\delta$ per day and the maximum rate of effector cell exhaustion (dE per day) for the baseline effector cell source (BL) model. The maximum log-likelihood is highlighted in yellow. |                                                                              |       |       |       |       |       |       |       |       |       |       |       |       |       |       |       |
|----------------------------------------------------------------------------------------------------------------------------------------------------------------------------------------------------------------------------------------------------------------------------------------------------------------------------------------------------------------------------|------------------------------------------------------------------------------|-------|-------|-------|-------|-------|-------|-------|-------|-------|-------|-------|-------|-------|-------|-------|
| BL Model                                                                                                                                                                                                                                                                                                                                                                   | Infected cell death rate due to viral cytopathic effects ( $\delta$ per day) |       |       |       |       |       |       |       |       |       |       |       |       |       |       |       |
|                                                                                                                                                                                                                                                                                                                                                                            | 0.05                                                                         | 0.1   | 0.15  | 0.2   | 0.25  | 0.3   | 0.35  | 0.4   | 0.45  | 0.5   | 0.55  | 0.6   | 0.65  | 0.7   | 0.75  |       |
| M<br>a<br>x<br>i<br>m<br>u<br>m<br><br>r<br>a<br>t<br>e<br><br>o<br>f<br><br>e<br>x<br>h<br>a<br>u<br>s<br>t<br>i<br>o<br>n<br><br>(<br>d<br>E<br><br>p<br>e<br>r<br><br>d<br>a<br>y                                                                                                                                                                                       | 1                                                                            | -5669 | -5690 | -5695 | -5648 | -5673 | -5676 | -5686 | -5676 | -5665 | -5683 | -5695 | -5665 | -5745 | -5760 | -5640 |
|                                                                                                                                                                                                                                                                                                                                                                            | 1.05                                                                         | -5699 | -5743 | -5672 | -5652 | -5696 | -5641 | -5625 | -5646 | -5638 | -5643 | -5670 | -5752 | -5650 | -5721 | -5768 |
|                                                                                                                                                                                                                                                                                                                                                                            | 1.1                                                                          | -5719 | -5648 | -5664 | -5655 | -5778 | -5688 | -5676 | -5644 | -5671 | -5757 | -5680 | -5740 | -5677 | -5674 | -5703 |
|                                                                                                                                                                                                                                                                                                                                                                            | 1.15                                                                         | -5494 | -5739 | -5734 | -5658 | -5680 | -5691 | -5626 | -5675 | -5654 | -5657 | -5669 | -5708 | -5657 | -5611 | -5646 |
|                                                                                                                                                                                                                                                                                                                                                                            | 1.2                                                                          | -5424 | -5529 | -5636 | -5659 | -5723 | -5632 | -5674 | -5641 | -5773 | -5701 | -5686 | -5668 | -5700 | -5736 | -5705 |
|                                                                                                                                                                                                                                                                                                                                                                            | 1.25                                                                         | -5407 | -5406 | -5615 | -5631 | -5634 | -5604 | -5658 | -5630 | -5607 | -5722 | -5628 | -5608 | -5695 | -5721 | -5721 |
|                                                                                                                                                                                                                                                                                                                                                                            | 1.3                                                                          | -5196 | -5097 | -5044 | -5016 | -5005 | -5000 | -5002 | -5004 | -5005 | -5007 | -5010 | -5015 | -5084 | -5031 | -5053 |
|                                                                                                                                                                                                                                                                                                                                                                            | 1.35                                                                         | -1300 | -1530 | -1732 | -923  | -920  | -244  | -899  | -305  | -205  | -139  | -133  | -127  | -135  | -139  | -150  |
|                                                                                                                                                                                                                                                                                                                                                                            | 1.4                                                                          | -1816 | -1157 | -1238 | -1285 | -1094 | -1658 | -1262 | -208  | -270  | -136  | -142  | -139  | -146  | -151  | -150  |
|                                                                                                                                                                                                                                                                                                                                                                            | 1.45                                                                         | -2021 | -1625 | -1655 | -1385 | -912  | -1597 | -1778 | -905  | -255  | -139  | -141  | -145  | -144  | -146  | -150  |
|                                                                                                                                                                                                                                                                                                                                                                            | 1.5                                                                          | -1693 | -2003 | -1714 | -1453 | -1372 | -1239 | -1485 | -944  | -252  | -138  | -147  | -148  | -149  | -152  | -153  |
|                                                                                                                                                                                                                                                                                                                                                                            | 1.55                                                                         | -1988 | -2027 | -1929 | -1965 | -1495 | -1896 | -1536 | -1484 | -1220 | -148  | -147  | -148  | -149  | -152  | -154  |
|                                                                                                                                                                                                                                                                                                                                                                            | 1.6                                                                          | -2011 | -1908 | -1981 | -1897 | -1825 | -1781 | -1174 | -662  | -1468 | -155  | -149  | -149  | -151  | -152  | -154  |
|                                                                                                                                                                                                                                                                                                                                                                            | 1.65                                                                         | -2010 | -2017 | -1968 | -1886 | -2061 | -1826 | -1622 | -1316 | -1450 | -151  | -151  | -151  | -152  | -154  | -155  |
|                                                                                                                                                                                                                                                                                                                                                                            | 1.7                                                                          | -2037 | -2062 | -2036 | -1995 | -2042 | -2013 | -1751 | -1241 | -1250 | -157  | -158  | -152  | -153  | -154  | -156  |
|                                                                                                                                                                                                                                                                                                                                                                            | 1.75                                                                         | -2075 | -2057 | -2009 | -2007 | -2008 | -1988 | -1914 | -1594 | -915  | -157  | -153  | -153  | -154  | -155  | -156  |
|                                                                                                                                                                                                                                                                                                                                                                            | 1.8                                                                          | -2080 | -2425 | -2117 | -2571 | -2021 | -1874 | -1864 | -1444 | -1491 | -160  | -155  | -154  | -156  | -156  | -157  |
|                                                                                                                                                                                                                                                                                                                                                                            | 1.85                                                                         | -2041 | -2042 | -2128 | -2033 | -2132 | -2101 | -1913 | -1509 | -1209 | -161  | -161  | -155  | -156  | -156  | -158  |
|                                                                                                                                                                                                                                                                                                                                                                            | 1.9                                                                          | -2437 | -2101 | -2401 | -2908 | -2091 | -2023 | -1959 | -1876 | -939  | -161  | -156  | -156  | -156  | -158  | -158  |
|                                                                                                                                                                                                                                                                                                                                                                            | 1.95                                                                         | -2176 | -2075 | -2069 | -2505 | -2138 | -2038 | -2018 | -1352 | -268  | -158  | -157  | -157  | -157  | -157  | -159  |
|                                                                                                                                                                                                                                                                                                                                                                            | 2                                                                            | -2064 | -2427 | -2090 | -2037 | -2050 | -2363 | -1914 | -1682 | -1158 | -163  | -158  | -157  | -157  | -159  | -158  |
|                                                                                                                                                                                                                                                                                                                                                                            | 2.05                                                                         | -2157 | -2086 | -2149 | -2375 | -2058 | -2050 | -2013 | -1745 | -1275 | -163  | -158  | -158  | -159  | -159  | -159  |
|                                                                                                                                                                                                                                                                                                                                                                            | 2.1                                                                          | -2573 | -2205 | -2061 | -2133 | -2376 | -2015 | -2401 | -1868 | -925  | -163  | -159  | -158  | -160  | -160  | -159  |
|                                                                                                                                                                                                                                                                                                                                                                            | 2.15                                                                         | -2426 | -2084 | -2043 | -2050 | -2373 | -2007 | -1956 | -2001 | -1276 | -161  | -159  | -159  | -161  | -159  | -159  |
|                                                                                                                                                                                                                                                                                                                                                                            | 2.2                                                                          | -2095 | -2046 | -2139 | -2946 | -2022 | -2051 | -2008 | -1987 | -1547 | -167  | -163  | -163  | -162  | -160  | -160  |
|                                                                                                                                                                                                                                                                                                                                                                            | 2.25                                                                         | -2065 | -2170 | -2511 | -2462 | -2471 | -2024 | -1972 | -1920 | -949  | -161  | -162  | -161  | -162  | -161  | -160  |
|                                                                                                                                                                                                                                                                                                                                                                            | 2.3                                                                          | -2512 | -2132 | -2468 | -2440 | -2011 | -2378 | -2098 | -1981 | -1281 | -164  | -161  | -160  | -162  | -161  | -160  |
|                                                                                                                                                                                                                                                                                                                                                                            | 2.35                                                                         | -2465 | -2436 | -2079 | -2448 | -2612 | -2507 | -2361 | -1954 | -934  | -165  | -163  | -160  | -166  | -164  | -160  |
|                                                                                                                                                                                                                                                                                                                                                                            | 2.4                                                                          | -2617 | -3023 | -2094 | -2828 | -2040 | -2024 | -2010 | -1904 | -1275 | -170  | -162  | -164  | -163  | -161  | -161  |
|                                                                                                                                                                                                                                                                                                                                                                            | 2.45                                                                         | -2554 | -2432 | -2414 | -2421 | -2369 | -2072 | -2474 | -2310 | -1081 | -166  | -166  | -165  | -162  | -162  | -161  |
|                                                                                                                                                                                                                                                                                                                                                                            | 2.5                                                                          | -2684 | -3011 | -2520 | -2920 | -2594 | -2093 | -2524 | -1932 | -1165 | -167  | -162  | -167  | -163  | -162  | -160  |
|                                                                                                                                                                                                                                                                                                                                                                            | 2.55                                                                         | -3025 | -3002 | -2853 | -2918 | -2475 | -2500 | -2020 | -1926 | -1276 | -167  | -165  | -164  | -163  | -162  | -161  |
|                                                                                                                                                                                                                                                                                                                                                                            | 2.6                                                                          | -2493 | -2916 | -2921 | -2902 | -3371 | -2941 | -2019 | -1985 | -1312 | -168  | -164  | -168  | -164  | -162  | -161  |
|                                                                                                                                                                                                                                                                                                                                                                            | 2.65                                                                         | -2646 | -3469 | -2936 | -2879 | -3384 | -3588 | -2487 | -1935 | -1061 | -163  | -166  | -168  | -163  | -162  | -161  |
|                                                                                                                                                                                                                                                                                                                                                                            | 2.7                                                                          | -2982 | -3085 | -2558 | -2498 | -3054 | -3284 | -2389 | -1944 | -1455 | -168  | -165  | -164  | -163  | -163  | -161  |
|                                                                                                                                                                                                                                                                                                                                                                            | 2.75                                                                         | -3457 | -3357 | -3381 | -2237 | -2515 | -3350 | -2406 | -1985 | -1451 | -168  | -163  | -165  | -163  | -163  | -161  |
|                                                                                                                                                                                                                                                                                                                                                                            | 2.8                                                                          | -3077 | -3504 | -3388 | -2916 | -3018 | -2902 | -2040 | -2039 | -1299 | -169  | -166  | -165  | -163  | -163  | -161  |
|                                                                                                                                                                                                                                                                                                                                                                            | 2.85                                                                         | -3459 | -3515 | -2610 | -3379 | -3836 | -2925 | -2377 | -2021 | -1641 | -169  | -165  | -165  | -165  | -163  | -162  |
|                                                                                                                                                                                                                                                                                                                                                                            | 2.9                                                                          | -2325 | -3099 | -3319 | -2643 | -3327 | -2407 | -2022 | -2017 | -1659 | -169  | -166  | -164  | -163  | -163  | -162  |
|                                                                                                                                                                                                                                                                                                                                                                            | 2.95                                                                         | -2688 | -2674 | -2965 | -2900 | -3889 | -2676 | -2815 | -2021 | -1104 | -168  | -167  | -165  | -165  | -163  | -162  |
|                                                                                                                                                                                                                                                                                                                                                                            | 3                                                                            | -5180 | -2382 | -2403 | -2865 | -2849 | -2947 | -2037 | -2425 | -1878 | -169  | -171  | -165  | -165  | -163  | -162  |
|                                                                                                                                                                                                                                                                                                                                                                            | 3.05                                                                         | -4898 | -2740 | -2443 | -2623 | -2846 | -2975 | -2365 | -2550 | -1186 | -169  | -171  | -167  | -164  | -163  | -162  |
|                                                                                                                                                                                                                                                                                                                                                                            | 3.1                                                                          | -4589 | -2719 | -2524 | -2227 | -3318 | -2872 | -2393 | -1974 | -1758 | -170  | -167  | -165  | -165  | -163  | -162  |
|                                                                                                                                                                                                                                                                                                                                                                            | 3.15                                                                         | -5178 | -2647 | -2508 | -2465 | -2248 | -3048 | -2514 | -2047 | -1096 | -168  | -170  | -165  | -165  | -163  | -162  |
|                                                                                                                                                                                                                                                                                                                                                                            | 3.2                                                                          | -5177 | -4528 | -2279 | -2159 | -2228 | -2188 | -2859 | -2037 | -1183 | -168  | -170  | -168  | -165  | -163  | -162  |
|                                                                                                                                                                                                                                                                                                                                                                            | 3.25                                                                         | -5173 | -4707 | -2367 | -2328 | -2364 | -2257 | -2087 | -2352 | -1566 | -170  | -166  | -166  | -165  | -163  | -162  |
|                                                                                                                                                                                                                                                                                                                                                                            | 3.3                                                                          | -4544 | -5181 | -2568 | -2432 | -2322 | -2306 | -2081 | -1952 | -1939 | -170  | -170  | -168  | -165  | -163  | -162  |
|                                                                                                                                                                                                                                                                                                                                                                            | 3.35                                                                         | -5171 | -4184 | -2395 | -2441 | -2334 | -2126 | -2111 | -1941 | -1842 | -171  | -169  | -168  | -165  | -163  | -162  |
|                                                                                                                                                                                                                                                                                                                                                                            | 3.4                                                                          | -5172 | -4718 | -2504 | -2379 | -2274 | -2160 | -2082 | -1947 | -1573 | -172  | -173  | -166  | -165  | -163  | -162  |
|                                                                                                                                                                                                                                                                                                                                                                            | 3.45                                                                         | -5171 | -5173 | -5086 | -2376 | -2352 | -2155 | -2083 | -1951 | -1547 | -171  | -170  | -167  | -165  | -163  | -162  |
| 3.5                                                                                                                                                                                                                                                                                                                                                                        | -5182                                                                        | -5167 | -5082 | -2542 | -2246 | -2185 | -2105 | -1955 | -1585 | -172  | -167  | -167  | -165  | -164  | -162  |       |
| 3.55                                                                                                                                                                                                                                                                                                                                                                       | -5177                                                                        | -5176 | -5094 | -2581 | -2293 | -2171 | -2104 | -1993 | -1588 | -171  | -167  | -166  | -165  | -163  | -162  |       |
| 3.6                                                                                                                                                                                                                                                                                                                                                                        | -5182                                                                        | -5173 | -5094 | -2431 | -2113 | -2157 | -2134 | -1965 | -1560 | -171  | -170  | -167  | -167  | -163  | -162  |       |
| 3.65                                                                                                                                                                                                                                                                                                                                                                       | -5174                                                                        | -5186 | -5089 | -2490 | -2316 | -2301 | -2109 | -1995 | -1546 | -171  | -168  | -167  | -165  | -163  | -162  |       |
| 3.7                                                                                                                                                                                                                                                                                                                                                                        | -5200                                                                        | -5171 | -5094 | -2285 | -2304 | -2288 | -2144 | -1998 | -1550 | -171  | -169  | -167  | -166  | -163  | -162  |       |
| 3.75                                                                                                                                                                                                                                                                                                                                                                       | -5192                                                                        | -5174 | -5089 | -2663 | -2293 | -2261 | -2076 | -1998 | -1650 | -173  | -168  | -171  | -165  | -163  | -162  |       |
| 3.8                                                                                                                                                                                                                                                                                                                                                                        | -5183                                                                        | -5175 | -5089 | -2462 | -2559 | -2307 | -2130 | -1993 | -1672 | -172  | -170  | -167  | -165  | -163  | -162  |       |
| 3.85                                                                                                                                                                                                                                                                                                                                                                       | -5178                                                                        | -5173 | -5093 | -4659 | -2497 | -2267 | -2158 | -2005 | -1612 | -171  | -168  | -168  | -165  | -163  | -162  |       |
| 3.9                                                                                                                                                                                                                                                                                                                                                                        | -5188                                                                        | -5173 | -5092 | -5039 | -2427 | -2285 | -2117 | -2003 | -1606 | -173  | -170  | -168  | -166  | -164  | -162  |       |
| 3.95                                                                                                                                                                                                                                                                                                                                                                       | -5182                                                                        | -5177 | -5095 | -5040 | -2557 | -2298 | -2121 | -2010 | -1637 | -173  | -169  | -168  | -166  | -163  | -162  |       |
| 4                                                                                                                                                                                                                                                                                                                                                                          | -5186                                                                        | -5184 | -5090 | -5043 | -2364 | -2453 | -2079 | -1995 | -1638 | -173  | -171  | -169  | -165  | -164  | -162  |       |
| 4.05                                                                                                                                                                                                                                                                                                                                                                       | -5171                                                                        | -5178 | -5092 | -5039 | -2503 | -2288 | -2218 | -2021 | -1659 | -171  | -170  | -170  | -165  | -163  | -162  |       |
| 4.1                                                                                                                                                                                                                                                                                                                                                                        | -5185                                                                        | -5180 | -5093 | -5043 | -2504 | -2096 | -2140 | -2013 | -1761 | -173  | -170  | -170  | -165  | -163  | -163  |       |
| 4.15                                                                                                                                                                                                                                                                                                                                                                       | -5176                                                                        | -5164 | -5093 | -5040 | -2670 | -2311 | -2218 | -2038 | -1678 | -173  | -170  | -167  | -165  | -164  | -163  |       |
| 4.2                                                                                                                                                                                                                                                                                                                                                                        | -5178                                                                        | -5178 | -5096 | -5041 | -2574 | -2310 | -2223 | -2045 | -1709 | -172  | -169  | -168  | -166  | -163  | -162  |       |
| 4.25                                                                                                                                                                                                                                                                                                                                                                       | -5186                                                                        | -5178 | -5100 | -5037 | -2562 | -2259 | -2226 | -2021 | -1705 | -174  | -170  | -168  | -165  | -164  | -162  |       |
| 4.3                                                                                                                                                                                                                                                                                                                                                                        | -5182                                                                        | -5186 | -5100 | -5042 | -2417 | -2211 | -2144 | -2045 | -1698 | -174  | -170  | -169  | -166  | -164  | -162  |       |
| 4.35                                                                                                                                                                                                                                                                                                                                                                       | -5177                                                                        | -5196 | -5094 | -5041 | -5013 | -2262 | -2176 | -2033 | -1708 | -175  | -171  | -169  | -166  | -164  | -164  |       |
| 4.4                                                                                                                                                                                                                                                                                                                                                                        | -5199                                                                        | -5178 | -5096 | -5043 | -5014 | -2364 | -2236 | -2043 | -1719 | -173  | -171  | -169  | -165  | -164  | -162  |       |
| 4.45                                                                                                                                                                                                                                                                                                                                                                       | -5191                                                                        | -5177 | -5096 | -5042 | -5013 | -2459 | -2293 | -2025 | -1699 | -174  | -171  | -168  | -167  | -164  | -163  |       |
| 4.5                                                                                                                                                                                                                                                                                                                                                                        | -5189                                                                        | -5173 | -5093 | -5042 | -5013 | -2588 | -2302 | -2027 | -1722 | -175  | -170  | -168  | -167  | -164  | -162  |       |
| 4.55                                                                                                                                                                                                                                                                                                                                                                       | -5192                                                                        | -5174 | -5100 | -5042 | -5016 | -2423 | -2213 | -2044 | -1734 | -174  | -171  | -169  | -166  | -164  | -163  |       |
| 4.6                                                                                                                                                                                                                                                                                                                                                                        | -5199                                                                        | -5189 | -5096 | -5044 | -5017 | -2474 | -2192 | -2052 | -1699 | -174  | -171  | -168  | -166  | -164  | -163  |       |
| 4.65                                                                                                                                                                                                                                                                                                                                                                       | -5184                                                                        | -5192 | -5101 | -5048 | -5018 | -2330 | -2210 | -2050 | -1735 | -174  | -171  | -168  | -165  | -164  | -163  |       |
| 4.7                                                                                                                                                                                                                                                                                                                                                                        | -5182                                                                        | -5171 | -5098 | -5042 | -5019 | -2502 | -2059 | -2056 | -1795 | -174  | -171  | -168  | -165  | -164  | -163  |       |
| 4.75                                                                                                                                                                                                                                                                                                                                                                       | -5191                                                                        | -5180 | -5100 | -5041 | -5016 | -2535 | -2245 | -2067 | -1737 | -174  | -171  | -168  | -166  | -164  | -163  |       |
| 4.8                                                                                                                                                                                                                                                                                                                                                                        | -5185                                                                        | -5177 | -5092 | -5042 | -5018 | -2534 | -2252 | -2082 | -1789 | -176  | -172  | -170  | -166  | -164  | -162  |       |
| 4.85                                                                                                                                                                                                                                                                                                                                                                       | -5183                                                                        | -5154 | -5109 | -5045 | -5019 | -2535 | -2144 | -2061 | -1802 | -175  | -172  | -171  | -166  | -164  | -162  |       |
| 4.9                                                                                                                                                                                                                                                                                                                                                                        | -5199                                                                        | -5174 | -5100 | -5042 | -5017 | -2588 | -2284 | -2063 | -1789 | -174  | -172  | -168  | -165  | -164  | -163  |       |
| 4.95                                                                                                                                                                                                                                                                                                                                                                       | -5208                                                                        | -5176 | -5098 | -5039 | -5019 | -2535 | -2243 | -2057 | -1787 | -175  | -172  | -169  | -166  | -164  | -163  |       |
| 5                                                                                                                                                                                                                                                                                                                                                                          | -5203                                                                        | -5185 | -5090 | -5045 | -5022 | -2539 | -2345 | -2090 | -1819 | -174  | -172  | -169  | -167  | -164  | -163  |       |
| 5.05                                                                                                                                                                                                                                                                                                                                                                       | -5201                                                                        | -5171 | -5101 | -5043 | -5017 | -2597 | -2388 | -2108 | -1777 | -175  | -172  | -169  | -166  | -164  | -162  |       |
| 5.1                                                                                                                                                                                                                                                                                                                                                                        | -5204                                                                        | -5178 | -5096 | -5041 | -5023 | -4435 | -2230 | -2215 | -1766 | -174  | -172  | -170  | -167  | -164  | -163  |       |
| 5.15                                                                                                                                                                                                                                                                                                                                                                       | -5207                                                                        | -5180 | -5108 | -5043 | -5018 | -5010 | -2462 | -2137 | -1768 | -175  | -172  | -168  | -165  | -164  | -163  |       |
| 5.2                                                                                                                                                                                                                                                                                                                                                                        | -5211                                                                        | -5190 | -5097 | -5045 | -5026 | -5011 |       |       |       |       |       |       |       |       |       |       |
