# Supplementary material for: Mechanistic basis of post-treatment control of SIV after anti-α4β7 antibody therapy
Source: PubMed Central journal article supplement (PMC8189501; doi:10.1371/journal.pcbi.1009031), 2021-06-09
Supplement: pcbi.1009031.s005.pdf [file pcbi.1009031.s005.pdf]

| S2 Table: The aggregated log-likelihood values for the seven control macaques from the primary grid search conducted on the infected cell death rate due to viral cytopathic effects $\delta$ per day and the maximum rate of effector cell exhaustion (d_E per day) for the saturated effector cell source (SS) model. The maximum log-likelihood is highlighted in yellow. |       |                                                                              |       |       |       |       |       |       |       |       |       |       |       |       |       |       |
|------------------------------------------------------------------------------------------------------------------------------------------------------------------------------------------------------------------------------------------------------------------------------------------------------------------------------------------------------------------------------|-------|------------------------------------------------------------------------------|-------|-------|-------|-------|-------|-------|-------|-------|-------|-------|-------|-------|-------|-------|
| SS Model                                                                                                                                                                                                                                                                                                                                                                     |       | Infected cell death rate due to viral cytopathic effects ( $\delta$ per day) |       |       |       |       |       |       |       |       |       |       |       |       |       |       |
|                                                                                                                                                                                                                                                                                                                                                                              |       | 0.05                                                                         | 0.1   | 0.15  | 0.2   | 0.25  | 0.3   | 0.35  | 0.4   | 0.45  | 0.5   | 0.55  | 0.6   | 0.65  | 0.7   | 0.75  |
| M<br>a<br>x<br>i<br>m<br>u<br>m<br><br>r<br>a<br>t<br>e<br><br>o<br>f<br><br>e<br>x<br>h<br>a<br>u<br>s<br>t<br>i<br>o<br>n<br><br>(<br>d<br>E<br><br>p<br>e<br>r<br><br>d<br>a<br>y                                                                                                                                                                                         | 1     | -5708                                                                        | -5675 | -5660 | -5634 | -5627 | -5669 | -5688 | -5596 | -5617 | -5642 | -5661 | -5682 | -5681 | -5747 |       |
|                                                                                                                                                                                                                                                                                                                                                                              | 1.05  | -5512                                                                        | -5676 | -5607 | -5653 | -5628 | -5681 | -5692 | -5628 | -5623 | -5658 | -5635 | -5643 | -5714 | -5717 | -5755 |
|                                                                                                                                                                                                                                                                                                                                                                              | 1.1   | -5506                                                                        | -5653 | -5659 | -5617 | -5626 | -5672 | -5655 | -5639 | -5645 | -5654 | -5713 | -5681 | -5688 | -5673 | -5639 |
|                                                                                                                                                                                                                                                                                                                                                                              | 1.15  | -5437                                                                        | -5641 | -5652 | -5652 | -5619 | -5646 | -5651 | -5663 | -5644 | -5648 | -5634 | -5773 | -5732 | -5711 | -5713 |
|                                                                                                                                                                                                                                                                                                                                                                              | 1.2   | -5367                                                                        | -5410 | -5466 | -5626 | -5646 | -5631 | -5616 | -5650 | -5593 | -5594 | -5636 | -5732 | -5706 | -5727 | -5656 |
|                                                                                                                                                                                                                                                                                                                                                                              | 1.25  | -5401                                                                        | -5421 | -5478 | -5607 | -5615 | -5593 | -5653 | -5604 | -5649 | -5687 | -5632 | -5645 | -5688 | -5717 | -5729 |
|                                                                                                                                                                                                                                                                                                                                                                              | 1.3   | -5203                                                                        | -5120 | -5054 | -5021 | -5008 | -5004 | -5003 | -5007 | -5008 | -5009 | -5010 | -5014 | -5020 | -5027 | -5041 |
|                                                                                                                                                                                                                                                                                                                                                                              | 1.35  | -1617                                                                        | -1296 | -1145 | -230  | -345  | -839  | -161  | -152  | -139  | -138  | -134  | -133  | -134  | -137  | -148  |
|                                                                                                                                                                                                                                                                                                                                                                              | 1.4   | -1613                                                                        | -1558 | -1436 | -276  | -951  | -264  | -167  | -163  | -148  | -138  | -140  | -149  | -142  | -146  | -154  |
|                                                                                                                                                                                                                                                                                                                                                                              | 1.45  | -1659                                                                        | -1559 | -1476 | -1284 | -1201 | -864  | -168  | -168  | -171  | -147  | -146  | -147  | -152  | -149  | -153  |
|                                                                                                                                                                                                                                                                                                                                                                              | 1.5   | -1761                                                                        | -1661 | -1604 | -1263 | -301  | -169  | -245  | -167  | -166  | -147  | -154  | -149  | -148  | -155  | -152  |
|                                                                                                                                                                                                                                                                                                                                                                              | 1.55  | -1797                                                                        | -1550 | -1594 | -1445 | -172  | -169  | -169  | -167  | -166  | -154  | -152  | -153  | -152  | -156  | -157  |
|                                                                                                                                                                                                                                                                                                                                                                              | 1.6   | -1815                                                                        | -1850 | -1717 | -1351 | -1166 | -860  | -168  | -168  | -166  | -156  | -156  | -154  | -153  | -155  | -157  |
|                                                                                                                                                                                                                                                                                                                                                                              | 1.65  | -1868                                                                        | -1552 | -1806 | -1666 | -737  | -493  | -169  | -168  | -167  | -156  | -155  | -155  | -154  | -156  | -158  |
|                                                                                                                                                                                                                                                                                                                                                                              | 1.7   | -1681                                                                        | -1670 | -1708 | -599  | -714  | -720  | -170  | -168  | -167  | -156  | -156  | -155  | -157  | -157  | -157  |
|                                                                                                                                                                                                                                                                                                                                                                              | 1.75  | -1736                                                                        | -2017 | -1900 | -1333 | -1395 | -336  | -255  | -168  | -169  | -161  | -156  | -156  | -158  | -157  | -158  |
|                                                                                                                                                                                                                                                                                                                                                                              | 1.8   | -1695                                                                        | -1973 | -1880 | -1704 | -1427 | -171  | -861  | -169  | -168  | -158  | -157  | -158  | -157  | -157  | -158  |
|                                                                                                                                                                                                                                                                                                                                                                              | 1.85  | -1690                                                                        | -1828 | -1684 | -1957 | -1427 | -184  | -177  | -169  | -168  | -158  | -158  | -158  | -157  | -157  | -158  |
|                                                                                                                                                                                                                                                                                                                                                                              | 1.9   | -1605                                                                        | -1979 | -1914 | -1667 | -1118 | -172  | -170  | -170  | -168  | -161  | -158  | -159  | -157  | -157  | -158  |
|                                                                                                                                                                                                                                                                                                                                                                              | 1.95  | -1876                                                                        | -1931 | -1723 | -1180 | -174  | -171  | -191  | -179  | -168  | -158  | -158  | -157  | -159  | -158  | -158  |
|                                                                                                                                                                                                                                                                                                                                                                              | 2     | -1744                                                                        | -1922 | -1581 | -1188 | -183  | -171  | -171  | -169  | -168  | -159  | -159  | -160  | -158  | -158  | -159  |
|                                                                                                                                                                                                                                                                                                                                                                              | 2.05  | -1706                                                                        | -1912 | -2039 | -195  | -175  | -171  | -171  | -173  | -168  | -159  | -159  | -161  | -159  | -158  | -159  |
|                                                                                                                                                                                                                                                                                                                                                                              | 2.1   | -1973                                                                        | -1856 | -1169 | -205  | -175  | -171  | -171  | -175  | -168  | -160  | -162  | -159  | -159  | -158  | -159  |
|                                                                                                                                                                                                                                                                                                                                                                              | 2.15  | -2140                                                                        | -1861 | -359  | -193  | -175  | -171  | -171  | -170  | -169  | -160  | -162  | -161  | -159  | -159  | -159  |
|                                                                                                                                                                                                                                                                                                                                                                              | 2.2   | -1874                                                                        | -2082 | -222  | -314  | -175  | -173  | -171  | -170  | -168  | -160  | -162  | -159  | -159  | -159  | -159  |
|                                                                                                                                                                                                                                                                                                                                                                              | 2.25  | -2009                                                                        | -1324 | -231  | -197  | -188  | -172  | -171  | -171  | -168  | -160  | -160  | -161  | -159  | -159  | -159  |
|                                                                                                                                                                                                                                                                                                                                                                              | 2.3   | -1972                                                                        | -359  | -219  | -326  | -318  | -171  | -172  | -170  | -170  | -161  | -160  | -160  | -159  | -159  | -159  |
|                                                                                                                                                                                                                                                                                                                                                                              | 2.35  | -2151                                                                        | -240  | -360  | -189  | -175  | -171  | -171  | -170  | -170  | -164  | -160  | -160  | -160  | -159  | -159  |
|                                                                                                                                                                                                                                                                                                                                                                              | 2.4   | -1653                                                                        | -228  | -221  | -198  | -360  | -184  | -171  | -170  | -169  | -161  | -161  | -161  | -161  | -159  | -159  |
|                                                                                                                                                                                                                                                                                                                                                                              | 2.45  | -236                                                                         | -235  | -224  | -321  | -175  | -171  | -178  | -170  | -169  | -161  | -161  | -163  | -160  | -159  | -159  |
|                                                                                                                                                                                                                                                                                                                                                                              | 2.5   | -233                                                                         | -227  | -214  | -188  | -175  | -313  | -171  | -170  | -170  | -162  | -161  | -160  | -160  | -159  | -159  |
|                                                                                                                                                                                                                                                                                                                                                                              | 2.55  | -236                                                                         | -233  | -222  | -186  | -175  | -171  | -171  | -171  | -170  | -165  | -161  | -163  | -160  | -160  | -160  |
|                                                                                                                                                                                                                                                                                                                                                                              | 2.6   | -232                                                                         | -224  | -213  | -187  | -175  | -171  | -171  | -175  | -170  | -164  | -161  | -163  | -160  | -160  | -160  |
|                                                                                                                                                                                                                                                                                                                                                                              | 2.65  | -235                                                                         | -227  | -209  | -185  | -174  | -172  | -170  | -171  | -170  | -165  | -161  | -160  | -160  | -160  | -160  |
|                                                                                                                                                                                                                                                                                                                                                                              | 2.7   | -229                                                                         | -223  | -221  | -186  | -174  | -185  | -171  | -170  | -170  | -164  | -162  | -161  | -160  | -160  | -160  |
|                                                                                                                                                                                                                                                                                                                                                                              | 2.75  | -236                                                                         | -223  | -208  | -185  | -175  | -171  | -170  | -170  | -172  | -164  | -163  | -164  | -161  | -160  | -160  |
|                                                                                                                                                                                                                                                                                                                                                                              | 2.8   | -235                                                                         | -222  | -208  | -185  | -174  | -171  | -170  | -170  | -170  | -164  | -163  | -162  | -161  | -160  | -160  |
|                                                                                                                                                                                                                                                                                                                                                                              | 2.85  | -231                                                                         | -221  | -206  | -184  | -174  | -171  | -170  | -171  | -172  | -164  | -163  | -161  | -162  | -160  | -160  |
|                                                                                                                                                                                                                                                                                                                                                                              | 2.9   | -234                                                                         | -220  | -206  | -197  | -174  | -171  | -170  | -171  | -170  | -165  | -165  | -162  | -161  | -160  | -160  |
|                                                                                                                                                                                                                                                                                                                                                                              | 2.95  | -227                                                                         | -224  | -205  | -184  | -174  | -171  | -183  | -170  | -170  | -167  | -162  | -164  | -162  | -160  | -160  |
|                                                                                                                                                                                                                                                                                                                                                                              | 3     | -1424                                                                        | -219  | -203  | -184  | -174  | -171  | -170  | -170  | -170  | -165  | -165  | -163  | -161  | -160  | -160  |
|                                                                                                                                                                                                                                                                                                                                                                              | 3.05  | -688                                                                         | -223  | -204  | -183  | -174  | -171  | -170  | -170  | -169  | -165  | -165  | -161  | -161  | -161  | -160  |
|                                                                                                                                                                                                                                                                                                                                                                              | 3.1   | -594                                                                         | -223  | -206  | -183  | -173  | -171  | -170  | -170  | -169  | -165  | -163  | -162  | -161  | -160  | -160  |
|                                                                                                                                                                                                                                                                                                                                                                              | 3.15  | -561                                                                         | -217  | -204  | -182  | -173  | -171  | -180  | -170  | -169  | -165  | -166  | -162  | -162  | -161  | -161  |
|                                                                                                                                                                                                                                                                                                                                                                              | 3.2   | -1083                                                                        | -1657 | -199  | -183  | -173  | -171  | -170  | -170  | -170  | -166  | -166  | -162  | -161  | -162  | -160  |
|                                                                                                                                                                                                                                                                                                                                                                              | 3.25  | -1906                                                                        | -591  | -198  | -183  | -180  | -171  | -170  | -170  | -169  | -164  | -164  | -162  | -163  | -161  | -160  |
|                                                                                                                                                                                                                                                                                                                                                                              | 3.3   | -502                                                                         | -222  | -199  | -181  | -174  | -170  | -170  | -181  | -169  | -166  | -164  | -167  | -161  | -162  | -161  |
|                                                                                                                                                                                                                                                                                                                                                                              | 3.35  | -1377                                                                        | -1669 | -209  | -181  | -173  | -170  | -170  | -170  | -169  | -165  | -165  | -163  | -163  | -161  | -161  |
|                                                                                                                                                                                                                                                                                                                                                                              | 3.4   | -688                                                                         | -1535 | -208  | -181  | -173  | -170  | -170  | -170  | -178  | -165  | -166  | -165  | -164  | -161  | -160  |
|                                                                                                                                                                                                                                                                                                                                                                              | 3.45  | -1595                                                                        | -1298 | -300  | -180  | -183  | -170  | -182  | -170  | -169  | -166  | -166  | -163  | -164  | -161  | -161  |
| 3.5                                                                                                                                                                                                                                                                                                                                                                          | -1153 | -1159                                                                        | -655  | -179  | -173  | -170  | -170  | -170  | -169  | -166  | -164  | -163  | -162  | -162  | -160  |       |
| 3.55                                                                                                                                                                                                                                                                                                                                                                         | -2053 | -631                                                                         | -900  | -179  | -173  | -170  | -170  | -170  | -174  | -165  | -167  | -163  | -162  | -161  | -160  |       |
| 3.6                                                                                                                                                                                                                                                                                                                                                                          | -1437 | -433                                                                         | -577  | -246  | -173  | -170  | -170  | -170  | -169  | -164  | -167  | -165  | -162  | -161  | -161  |       |
| 3.65                                                                                                                                                                                                                                                                                                                                                                         | -2019 | -1398                                                                        | -1569 | -187  | -172  | -170  | -170  | -170  | -169  | -166  | -164  | -164  | -163  | -162  | -160  |       |
| 3.7                                                                                                                                                                                                                                                                                                                                                                          | -1288 | -891                                                                         | -1129 | -189  | -172  | -170  | -170  | -172  | -182  | -166  | -166  | -164  | -162  | -161  | -160  |       |
| 3.75                                                                                                                                                                                                                                                                                                                                                                         | -516  | -1497                                                                        | -762  | -178  | -172  | -170  | -170  | -170  | -169  | -167  | -166  | -163  | -162  | -161  | -161  |       |
| 3.8                                                                                                                                                                                                                                                                                                                                                                          | -1098 | -1128                                                                        | -681  | -536  | -172  | -170  | -170  | -170  | -169  | -170  | -166  | -163  | -163  | -161  | -161  |       |
| 3.85                                                                                                                                                                                                                                                                                                                                                                         | -1238 | -354                                                                         | -1992 | -1150 | -172  | -170  | -170  | -170  | -170  | -165  | -166  | -163  | -162  | -161  | -161  |       |
| 3.9                                                                                                                                                                                                                                                                                                                                                                          | -544  | -518                                                                         | -353  | -293  | -172  | -170  | -181  | -170  | -171  | -166  | -165  | -164  | -164  | -162  | -161  |       |
| 3.95                                                                                                                                                                                                                                                                                                                                                                         | -527  | -594                                                                         | -1002 | -501  | -263  | -170  | -170  | -170  | -169  | -166  | -165  | -166  | -164  | -161  | -161  |       |
| 4                                                                                                                                                                                                                                                                                                                                                                            | -586  | -1341                                                                        | -989  | -599  | -240  | -184  | -170  | -170  | -171  | -166  | -164  | -163  | -163  | -161  | -161  |       |
| 4.05                                                                                                                                                                                                                                                                                                                                                                         | -212  | -543                                                                         | -668  | -1567 | -172  | -170  | -170  | -171  | -169  | -166  | -164  | -163  | -163  | -163  | -161  |       |
| 4.1                                                                                                                                                                                                                                                                                                                                                                          | -801  | -907                                                                         | -831  | -564  | -171  | -170  | -170  | -170  | -172  | -168  | -164  | -165  | -162  | -161  | -161  |       |
| 4.15                                                                                                                                                                                                                                                                                                                                                                         | -545  | -298                                                                         | -1747 | -421  | -171  | -170  | -169  | -170  | -169  | -167  | -166  | -163  | -162  | -161  | -161  |       |
| 4.2                                                                                                                                                                                                                                                                                                                                                                          | -704  | -385                                                                         | -879  | -1529 | -241  | -170  | -170  | -169  | -169  | -166  | -167  | -163  | -163  | -161  | -161  |       |
| 4.25                                                                                                                                                                                                                                                                                                                                                                         | -1250 | -474                                                                         | -829  | -1615 | -188  | -170  | -169  | -169  | -169  | -167  | -165  | -165  | -162  | -161  | -161  |       |
| 4.3                                                                                                                                                                                                                                                                                                                                                                          | -354  | -305                                                                         | -1121 | -539  | -616  | -170  | -169  | -169  | -169  | -166  | -164  | -164  | -163  | -162  | -161  |       |
| 4.35                                                                                                                                                                                                                                                                                                                                                                         | -384  | -726                                                                         | -844  | -1068 | -1166 | -170  | -169  | -169  | -169  | -174  | -166  | -164  | -166  | -162  | -161  |       |
| 4.4                                                                                                                                                                                                                                                                                                                                                                          | -1294 | -1226                                                                        | -420  | -1707 | -1340 | -170  | -170  | -169  | -169  | -170  | -164  | -164  | -163  | -161  | -161  |       |
| 4.45                                                                                                                                                                                                                                                                                                                                                                         | -1325 | -702                                                                         | -666  | -1674 | -661  | -170  | -169  | -169  | -169  | -167  | -165  | -166  | -163  | -162  | -161  |       |
| 4.5                                                                                                                                                                                                                                                                                                                                                                          | -537  | -333                                                                         | -889  | -743  | -1153 | -170  | -169  | -170  | -169  | -167  | -168  | -164  | -163  | -162  | -161  |       |
| 4.55                                                                                                                                                                                                                                                                                                                                                                         | -508  | -469                                                                         | -1268 | -546  | -767  | -170  | -169  | -169  | -169  | -171  | -167  | -164  | -163  | -162  | -161  |       |
| 4.6                                                                                                                                                                                                                                                                                                                                                                          | -269  | -446                                                                         | -863  | -1564 | -1660 | -170  | -169  | -174  | -169  | -172  | -165  | -165  | -163  | -163  | -161  |       |
| 4.65                                                                                                                                                                                                                                                                                                                                                                         | -201  | -1357                                                                        | -893  | -174  | -1210 | -169  | -169  | -169  | -169  | -171  | -165  | -164  | -164  | -162  | -161  |       |
| 4.7                                                                                                                                                                                                                                                                                                                                                                          | -1161 | -536                                                                         | -1252 | -1483 | -1809 | -169  | -169  | -169  | -169  | -167  | -165  | -164  | -164  | -162  | -161  |       |
| 4.75                                                                                                                                                                                                                                                                                                                                                                         | -769  | -190                                                                         | -1301 | -1692 | -291  | -169  | -169  | -169  | -169  | -173  | -167  | -164  | -164  | -162  | -162  |       |
| 4.8                                                                                                                                                                                                                                                                                                                                                                          | -377  | -1187                                                                        | -1143 | -703  | -291  | -169  | -169  | -169  | -169  | -166  | -169  | -164  | -164  | -162  | -161  |       |
| 4.85                                                                                                                                                                                                                                                                                                                                                                         | -1252 | -1026                                                                        | -543  | -1239 | -930  | -169  | -169  | -169  | -169  | -167  | -167  | -164  | -163  | -164  | -162  |       |
| 4.9                                                                                                                                                                                                                                                                                                                                                                          | -326  | -545                                                                         | -464  | -874  | -345  | -169  | -169  | -169  | -169  | -167  | -169  | -164  | -163  | -162  | -162  |       |
| 4.95                                                                                                                                                                                                                                                                                                                                                                         | -718  | -1195                                                                        | -792  | -875  | -1179 | -169  | -169  | -169  | -169  | -167  | -167  | -167  | -165  | -162  | -161  |       |
| 5                                                                                                                                                                                                                                                                                                                                                                            | -238  | -546                                                                         | -664  | -279  | -1160 | -169  | -169  | -170  | -168  | -170  | -168  | -164  | -164  | -163  | -162  |       |
| 5.05                                                                                                                                                                                                                                                                                                                                                                         | -1028 | -501                                                                         | -348  | -724  | -756  | -880  | -169  | -169  | -169  | -168  | -167  | -165  | -165  | -162  | -162  |       |
| 5.1                                                                                                                                                                                                                                                                                                                                                                          | -493  | -1559                                                                        | -1468 | -837  | -959  | -1093 | -169  | -169  | -169  | -167  | -169  | -167  | -166  | -163  | -162  |       |
| 5.15                                                                                                                                                                                                                                                                                                                                                                         | -208  | -863                                                                         | -346  | -1091 | -903  | -1240 | -169  | -169  | -169  | -168  | -167  | -165  | -163  | -162  | -162  |       |
| 5.2                                                                                                                                                                                                                                                                                                                                                                          | -1273 | -505                                                                         | -715  | -1015 | -993  | -864  | -169  | -169  | -169  | -169  | -168  | -166  | -166  | -162  | -161  |       |
| 5.25                                                                                                                                                                                                                                                                                                                                                                         | -903  | -1018                                                                        | -467  | -1164 | -877  | -732  | -169  | -169  | -168  | -172  | -167  | -166  | -163  | -162  | -162  |       |
| 5.3                                                                                                                                                                                                                                                                                                                                                                          | -322  | -1149                                                                        | -925  | -515  | -1089 | -169  | -169  | -169  | -169  | -172  | -168  | -166  | -165  | -163  | -162  |       |
| 5.35                                                                                                                                                                                                                                                                                                                                                                         | -1016 | -763                                                                         | -1499 | -339  | -711  | -533  | -169  | -169  |       |       |       |       |       |       |       |       |
