# Supplementary material for: Mechanistic basis of post-treatment control of SIV after anti-α4β7 antibody therapy
Source: PubMed Central journal article supplement (PMC8189501; doi:10.1371/journal.pcbi.1009031), 2021-06-09
Supplement: pcbi.1009031.s006.pdf [file pcbi.1009031.s006.pdf]

| S3 Table: The aggregated log-likelihood values for the seven control macaques from the primary grid search conducted on the infected cell death rate due to viral cytopathic effects $\delta$ per day and the maximum rate of effector cell exhaustion ( $d_E$ per day) for the antigen presenting cell effector cell source (APCS) model. The maximum log-likelihood is highlighted in yellow. |      |                                                                              |       |       |       |       |       |        |       |       |       |       |       |       |       |       |
|-------------------------------------------------------------------------------------------------------------------------------------------------------------------------------------------------------------------------------------------------------------------------------------------------------------------------------------------------------------------------------------------------|------|------------------------------------------------------------------------------|-------|-------|-------|-------|-------|--------|-------|-------|-------|-------|-------|-------|-------|-------|
| APCS Model                                                                                                                                                                                                                                                                                                                                                                                      |      | Infected cell death rate due to viral cytopathic effects ( $\delta$ per day) |       |       |       |       |       |        |       |       |       |       |       |       |       |       |
|                                                                                                                                                                                                                                                                                                                                                                                                 |      | 0.05                                                                         | 0.1   | 0.15  | 0.2   | 0.25  | 0.3   | 0.35   | 0.4   | 0.45  | 0.5   | 0.55  | 0.6   | 0.65  | 0.7   | 0.75  |
| M<br>a<br>x<br>i<br>m<br>u<br>r<br>a<br>t<br>e<br>o<br>f<br>e<br>x<br>h<br>a<br>u<br>s<br>t<br>i<br>o<br>n<br><br>(<br>d<br>E<br>p<br>e<br>r<br>d<br>a<br>y                                                                                                                                                                                                                                     | 1    | -5478                                                                        | -5558 | -5563 | -5536 | -5618 | -5688 | -5652  | -5623 | -5615 | -5629 | -5684 | -5678 | -5647 | -5684 | -5622 |
|                                                                                                                                                                                                                                                                                                                                                                                                 | 1.05 | -5469                                                                        | -5660 | -5491 | -5616 | -5637 | -5615 | -5658  | -5620 | -5646 | -5648 | -5626 | -5617 | -5618 | -5607 | -5655 |
|                                                                                                                                                                                                                                                                                                                                                                                                 | 1.1  | -5398                                                                        | -5563 | -5484 | -5608 | -5595 | -5635 | -5617  | -5662 | -5623 | -5639 | -5611 | -5603 | -5611 | -5644 | -5642 |
|                                                                                                                                                                                                                                                                                                                                                                                                 | 1.15 | -5365                                                                        | -5400 | -5433 | -5441 | -5630 | -5616 | -5659  | -5637 | -5649 | -5637 | -5604 | -5619 | -5682 | -5692 | -5729 |
|                                                                                                                                                                                                                                                                                                                                                                                                 | 1.2  | -5339                                                                        | -5359 | -5489 | -5578 | -5623 | -5564 | -5713  | -5620 | -5604 | -5663 | -5628 | -5596 | -5559 | -5656 | -5609 |
|                                                                                                                                                                                                                                                                                                                                                                                                 | 1.25 | -5325                                                                        | -5324 | -5392 | -5529 | -5620 | -5465 | -5498  | -5628 | -5589 | -5576 | -5625 | -5628 | -5682 | -5541 | -5700 |
|                                                                                                                                                                                                                                                                                                                                                                                                 | 1.3  | -5174                                                                        | -5065 | -5047 | -5026 | -5018 | -5010 | -5009  | -5010 | -5013 | -5014 | -5018 | -5018 | -5023 | -5034 | -5043 |
|                                                                                                                                                                                                                                                                                                                                                                                                 | 1.35 | -177                                                                         | -159  | -152  | -154  | -155  | -156  | -157   | -159  | -156  | -156  | -155  | -157  | -157  | -159  | -161  |
|                                                                                                                                                                                                                                                                                                                                                                                                 | 1.4  | -174                                                                         | -156  | -155  | -156  | -159  | -158  | -159   | -158  | -157  | -157  | -157  | -158  | -158  | -159  | -161  |
|                                                                                                                                                                                                                                                                                                                                                                                                 | 1.45 | -182                                                                         | -157  | -155  | -157  | -158  | -159  | -160   | -159  | -158  | -158  | -157  | -157  | -158  | -159  | -161  |
|                                                                                                                                                                                                                                                                                                                                                                                                 | 1.5  | -173                                                                         | -158  | -155  | -157  | -158  | -159  | -159   | -163  | -157  | -158  | -157  | -157  | -158  | -159  | -160  |
|                                                                                                                                                                                                                                                                                                                                                                                                 | 1.55 | -170                                                                         | -154  | -153  | -155  | -157  | -158  | -158   | -158  | -159  | -157  | -158  | -157  | -157  | -159  | -160  |
|                                                                                                                                                                                                                                                                                                                                                                                                 | 1.6  | -169                                                                         | -150  | -150  | -153  | -155  | -157  | -159   | -157  | -157  | -156  | -156  | -156  | -158  | -159  | -161  |
|                                                                                                                                                                                                                                                                                                                                                                                                 | 1.65 | -172                                                                         | -148  | -149  | -152  | -152  | -155  | -156   | -156  | -157  | -155  | -156  | -156  | -157  | -158  | -160  |
|                                                                                                                                                                                                                                                                                                                                                                                                 | 1.7  | -178                                                                         | -147  | -147  | -150  | -150  | -152  | -155   | -155  | -157  | -155  | -155  | -156  | -157  | -158  | -160  |
|                                                                                                                                                                                                                                                                                                                                                                                                 | 1.75 | -163                                                                         | -144  | -145  | -146  | -151  | -152  | -152   | -154  | -154  | -154  | -155  | -155  | -157  | -158  | -160  |
|                                                                                                                                                                                                                                                                                                                                                                                                 | 1.8  | -182                                                                         | -142  | -142  | -144  | -146  | -151  | -151   | -151  | -153  | -153  | -154  | -155  | -156  | -157  | -159  |
|                                                                                                                                                                                                                                                                                                                                                                                                 | 1.85 | -165                                                                         | -150  | -141  | -145  | -146  | -147  | -147   | -149  | -151  | -152  | -153  | -155  | -155  | -157  | -159  |
|                                                                                                                                                                                                                                                                                                                                                                                                 | 1.9  | -171                                                                         | -144  | -139  | -144  | -142  | -146  | -147   | -147  | -151  | -150  | -153  | -154  | -155  | -157  | -158  |
|                                                                                                                                                                                                                                                                                                                                                                                                 | 1.95 | -164                                                                         | -141  | -138  | -141  | -142  | -142  | -144   | -146  | -149  | -151  | -152  | -154  | -155  | -156  | -158  |
|                                                                                                                                                                                                                                                                                                                                                                                                 | 2    | -166                                                                         | -139  | -138  | -140  | -141  | -144  | -145   | -149  | -147  | -150  | -152  | -153  | -154  | -156  | -158  |
|                                                                                                                                                                                                                                                                                                                                                                                                 | 2.05 | -163                                                                         | -138  | -137  | -138  | -140  | -141  | -142   | -146  | -149  | -148  | -152  | -153  | -154  | -156  | -158  |
|                                                                                                                                                                                                                                                                                                                                                                                                 | 2.1  | -160                                                                         | -137  | -137  | -137  | -139  | -140  | -142   | -145  | -147  | -150  | -151  | -155  | -154  | -155  | -157  |
|                                                                                                                                                                                                                                                                                                                                                                                                 | 2.15 | -160                                                                         | -138  | -135  | -136  | -138  | -139  | -141   | -144  | -145  | -149  | -150  | -152  | -154  | -155  | -157  |
|                                                                                                                                                                                                                                                                                                                                                                                                 | 2.2  | -163                                                                         | -137  | -136  | -136  | -137  | -139  | -140   | -143  | -146  | -147  | -149  | -152  | -153  | -155  | -157  |
|                                                                                                                                                                                                                                                                                                                                                                                                 | 2.25 | -166                                                                         | -137  | -135  | -135  | -140  | -140  | -140   | -143  | -144  | -147  | -149  | -151  | -153  | -155  | -157  |
|                                                                                                                                                                                                                                                                                                                                                                                                 | 2.3  | -162                                                                         | -138  | -134  | -135  | -137  | -138  | -140   | -142  | -144  | -146  | -148  | -151  | -153  | -155  | -157  |
|                                                                                                                                                                                                                                                                                                                                                                                                 | 2.35 | -159                                                                         | -135  | -134  | -135  | -135  | -138  | -140   | -141  | -144  | -145  | -149  | -151  | -153  | -154  | -157  |
|                                                                                                                                                                                                                                                                                                                                                                                                 | 2.4  | -161                                                                         | -135  | -133  | -134  | -136  | -137  | -139   | -140  | -143  | -145  | -149  | -151  | -152  | -154  | -157  |
|                                                                                                                                                                                                                                                                                                                                                                                                 | 2.45 | -159                                                                         | -137  | -134  | -135  | -136  | -137  | -139   | -141  | -143  | -145  | -148  | -153  | -152  | -154  | -157  |
|                                                                                                                                                                                                                                                                                                                                                                                                 | 2.5  | -158                                                                         | -136  | -132  | -134  | -135  | -136  | -139   | -140  | -144  | -145  | -147  | -150  | -152  | -154  | -156  |
|                                                                                                                                                                                                                                                                                                                                                                                                 | 2.55 | -159                                                                         | -134  | -133  | -134  | -134  | -137  | -138   | -140  | -142  | -144  | -148  | -150  | -152  | -154  | -156  |
|                                                                                                                                                                                                                                                                                                                                                                                                 | 2.6  | -159                                                                         | -134  | -133  | -134  | -135  | -136  | -137   | -139  | -142  | -144  | -149  | -150  | -152  | -154  | -156  |
|                                                                                                                                                                                                                                                                                                                                                                                                 | 2.65 | -158                                                                         | -133  | -134  | -133  | -134  | -136  | -137   | -139  | -141  | -144  | -146  | -150  | -152  | -154  | -156  |
|                                                                                                                                                                                                                                                                                                                                                                                                 | 2.7  | -177                                                                         | -133  | -131  | -133  | -135  | -136  | -138   | -139  | -142  | -145  | -148  | -149  | -152  | -154  | -156  |
|                                                                                                                                                                                                                                                                                                                                                                                                 | 2.75 | -165                                                                         | -133  | -132  | -132  | -134  | -136  | -137   | -139  | -142  | -144  | -148  | -149  | -151  | -154  | -156  |
|                                                                                                                                                                                                                                                                                                                                                                                                 | 2.8  | -163                                                                         | -136  | -130  | -132  | -133  | -135  | -137   | -140  | -142  | -144  | -146  | -149  | -151  | -153  | -156  |
|                                                                                                                                                                                                                                                                                                                                                                                                 | 2.85 | -163                                                                         | -133  | -130  | -131  | -133  | -136  | -136   | -140  | -142  | -143  | -147  | -148  | -151  | -153  | -156  |
|                                                                                                                                                                                                                                                                                                                                                                                                 | 2.9  | -159                                                                         | -132  | -130  | -131  | -134  | -134  | -136   | -140  | -142  | -144  | -147  | -148  | -151  | -153  | -156  |
|                                                                                                                                                                                                                                                                                                                                                                                                 | 2.95 | -157                                                                         | -132  | -129  | -131  | -134  | -134  | -136   | -138  | -140  | -142  | -147  | -150  | -151  | -153  | -156  |
|                                                                                                                                                                                                                                                                                                                                                                                                 | 3    | -158                                                                         | -133  | -129  | -131  | -134  | -134  | -136   | -138  | -140  | -144  | -147  | -150  | -151  | -153  | -156  |
|                                                                                                                                                                                                                                                                                                                                                                                                 | 3.05 | -157                                                                         | -132  | -129  | -130  | -132  | -133  | -137   | -139  | -140  | -144  | -145  | -148  | -151  | -153  | -155  |
|                                                                                                                                                                                                                                                                                                                                                                                                 | 3.1  | -160                                                                         | -133  | -129  | -131  | -132  | -133  | -135   | -138  | -141  | -142  | -145  | -148  | -151  | -153  | -155  |
|                                                                                                                                                                                                                                                                                                                                                                                                 | 3.15 | -165                                                                         | -135  | -129  | -131  | -131  | -134  | -135   | -138  | -139  | -141  | -145  | -148  | -151  | -153  | -155  |
|                                                                                                                                                                                                                                                                                                                                                                                                 | 3.2  | -163                                                                         | -136  | -129  | -130  | -132  | -134  | -135   | -138  | -139  | -143  | -146  | -148  | -150  | -153  | -155  |
|                                                                                                                                                                                                                                                                                                                                                                                                 | 3.25 | -166                                                                         | -132  | -129  | -130  | -134  | -133  | -134   | -137  | -139  | -142  | -144  | -147  | -151  | -153  | -155  |
|                                                                                                                                                                                                                                                                                                                                                                                                 | 3.3  | -164                                                                         | -132  | -129  | -132  | -133  | -132  | -136   | -136  | -139  | -141  | -146  | -147  | -151  | -153  | -155  |
|                                                                                                                                                                                                                                                                                                                                                                                                 | 3.35 | -164                                                                         | -132  | -128  | -129  | -131  | -133  | -134   | -136  | -139  | -142  | -147  | -147  | -151  | -153  | -155  |
|                                                                                                                                                                                                                                                                                                                                                                                                 | 3.4  | -169                                                                         | -132  | -128  | -129  | -131  | -132  | -135   | -137  | -139  | -141  | -146  | -148  | -150  | -153  | -155  |
|                                                                                                                                                                                                                                                                                                                                                                                                 | 3.45 | -162                                                                         | -135  | -128  | -129  | -131  | -134  | -134   | -136  | -139  | -142  | -144  | -148  | -150  | -152  | -155  |
|                                                                                                                                                                                                                                                                                                                                                                                                 | 3.5  | -161                                                                         | -131  | -128  | -129  | -131  | -132  | -135   | -137  | -139  | -141  | -145  | -148  | -151  | -153  | -155  |
| 3.55                                                                                                                                                                                                                                                                                                                                                                                            | -162 | -135                                                                         | -131  | -129  | -130  | -132  | -134  | -138   | -139  | -141  | -144  | -148  | -151  | -153  | -155  |       |
| 3.6                                                                                                                                                                                                                                                                                                                                                                                             | -157 | -132                                                                         | -128  | -129  | -130  | -132  | -134  | -136   | -140  | -140  | -144  | -147  | -151  | -153  | -155  |       |
| 3.65                                                                                                                                                                                                                                                                                                                                                                                            | -167 | -131                                                                         | -128  | -129  | -130  | -132  | -134  | -135   | -138  | -140  | -145  | -148  | -150  | -153  | -155  |       |
| 3.7                                                                                                                                                                                                                                                                                                                                                                                             | -166 | -133                                                                         | -128  | -129  | -130  | -133  | -134  | -135   | -139  | -140  | -144  | -147  | -150  | -153  | -155  |       |
| 3.75                                                                                                                                                                                                                                                                                                                                                                                            | -167 | -132                                                                         | -128  | -129  | -130  | -132  | -133  | -136   | -138  | -141  | -144  | -147  | -150  | -153  | -155  |       |
| 3.8                                                                                                                                                                                                                                                                                                                                                                                             | -161 | -136                                                                         | -128  | -132  | -130  | -132  | -135  | -135   | -137  | -140  | -144  | -150  | -150  | -153  | -155  |       |
| 3.85                                                                                                                                                                                                                                                                                                                                                                                            | -160 | -132                                                                         | -128  | -129  | -133  | -134  | -133  | -137   | -138  | -141  | -144  | -146  | -151  | -153  | -155  |       |
| 3.9                                                                                                                                                                                                                                                                                                                                                                                             | -168 | -132                                                                         | -128  | -129  | -130  | -132  | -134  | -135   | -137  | -141  | -143  | -145  | -149  | -152  | -155  |       |
| 3.95                                                                                                                                                                                                                                                                                                                                                                                            | -179 | -132                                                                         | -128  | -129  | -132  | -131  | -133  | -135   | -138  | -142  | -143  | -147  | -150  | -152  | -155  |       |
| 4                                                                                                                                                                                                                                                                                                                                                                                               | -168 | -132                                                                         | -128  | -128  | -130  | -131  | -135  | -136   | -138  | -141  | -145  | -147  | -149  | -152  | -155  |       |
| 4.05                                                                                                                                                                                                                                                                                                                                                                                            | -166 | -132                                                                         | -128  | -128  | -131  | -131  | -133  | -135   | -137  | -141  | -143  | -147  | -149  | -152  | -155  |       |
| 4.1                                                                                                                                                                                                                                                                                                                                                                                             | -160 | -136                                                                         | -128  | -128  | -130  | -134  | -133  | -137   | -137  | -141  | -142  | -146  | -150  | -152  | -155  |       |
| 4.15                                                                                                                                                                                                                                                                                                                                                                                            | -164 | -132                                                                         | -128  | -128  | -130  | -131  | -133  | -137   | -138  | -140  | -142  | -146  | -150  | -153  | -155  |       |
| 4.2                                                                                                                                                                                                                                                                                                                                                                                             | -171 | -132                                                                         | -131  | -128  | -130  | -131  | -135  | -135   | -137  | -140  | -142  | -145  | -150  | -152  | -155  |       |
| 4.25                                                                                                                                                                                                                                                                                                                                                                                            | -163 | -132                                                                         | -128  | -128  | -130  | -134  | -133  | -134   | -137  | -139  | -142  | -146  | -149  | -152  | -155  |       |
| 4.3                                                                                                                                                                                                                                                                                                                                                                                             | -158 | -132                                                                         | -128  | -128  | -132  | -132  | -133  | -136   | -137  | -140  | -143  | -145  | -150  | -152  | -155  |       |
| 4.35                                                                                                                                                                                                                                                                                                                                                                                            | -165 | -137                                                                         | -131  | -128  | -132  | -133  | -133  | -134   | -138  | -141  | -143  | -146  | -148  | -152  | -155  |       |
| 4.4                                                                                                                                                                                                                                                                                                                                                                                             | -162 | -133                                                                         | -128  | -128  | -132  | -131  | -135  | -135   | -137  | -140  | -142  | -145  | -150  | -152  | -155  |       |
| 4.45                                                                                                                                                                                                                                                                                                                                                                                            | -166 | -133                                                                         | -128  | -128  | -130  | -131  | -134  | -136   | -137  | -139  | -142  | -146  | -148  | -152  | -155  |       |
| 4.5                                                                                                                                                                                                                                                                                                                                                                                             | -166 | -133                                                                         | -129  | -128  | -130  | -131  | -134  | -136   | -138  | -140  | -142  | -146  | -150  | -152  | -155  |       |
| 4.55                                                                                                                                                                                                                                                                                                                                                                                            | -165 | -133                                                                         | -128  | -128  | -129  | -131  | -132  | -135   | -138  | -139  | -142  | -146  | -148  | -152  | -155  |       |
| 4.6                                                                                                                                                                                                                                                                                                                                                                                             | -163 | -132                                                                         | -128  | -128  | -133  | -131  | -134  | -135   | -137  | -139  | -142  | -145  | -148  | -152  | -155  |       |
| 4.65                                                                                                                                                                                                                                                                                                                                                                                            | -163 | -136                                                                         | -135  | -128  | -129  | -131  | -134  | -135   | -137  | -142  | -142  | -145  | -148  | -152  | -155  |       |
| 4.7                                                                                                                                                                                                                                                                                                                                                                                             | -168 | -132                                                                         | -128  | -128  | -130  | -131  | -133  | -134   | -136  | -139  | -142  | -145  | -148  | -151  | -155  |       |
| 4.75                                                                                                                                                                                                                                                                                                                                                                                            | -175 | -133                                                                         | -128  | -128  | -129  | -131  | -133  | -135   | -137  | -140  | -142  | -145  | -148  | -152  | -155  |       |
| 4.8                                                                                                                                                                                                                                                                                                                                                                                             | -164 | -138                                                                         | -128  | -129  | -129  | -131  | -133  | -134   | -136  | -140  | -142  | -144  | -148  | -151  | -154  |       |
| 4.85                                                                                                                                                                                                                                                                                                                                                                                            | -162 | -138                                                                         | -128  | -131  | -129  | -131  | -132  | -135   | -137  | -140  | -142  | -145  | -147  | -151  | -154  |       |
| 4.9                                                                                                                                                                                                                                                                                                                                                                                             | -163 | -137                                                                         | -128  | -128  | -133  | -131  | -132  | -136   | -136  | -139  | -141  | -146  | -148  | -152  | -154  |       |
| 4.95                                                                                                                                                                                                                                                                                                                                                                                            | -173 | -136                                                                         | -128  | -128  | -129  | -131  | -133  | -135   | -137  | -139  | -142  | -144  | -147  | -151  | -155  |       |
| 5                                                                                                                                                                                                                                                                                                                                                                                               | -159 | -134                                                                         | -128  | -128  | -129  | -131  | -133  | -135   | -136  | -139  | -141  | -144  | -147  | -152  | -155  |       |
| 5.05                                                                                                                                                                                                                                                                                                                                                                                            | -166 | -133                                                                         | -128  | -128  | -129  | -131  | -133  | -137   | -136  | -139  | -143  | -144  | -147  | -151  | -155  |       |
| 5.1                                                                                                                                                                                                                                                                                                                                                                                             | -170 | -136                                                                         | -128  | -128  | -129  | -131  | -133  | -135   | -137  | -140  | -142  | -145  | -147  | -151  | -155  |       |
| 5.15                                                                                                                                                                                                                                                                                                                                                                                            | -168 | -150                                                                         | -128  | -128  | -129  | -131  | -133  | -134   | -136  | -140  | -142  | -146  | -147  | -151  | -155  |       |
| 5.2                                                                                                                                                                                                                                                                                                                                                                                             | -168 | -137                                                                         | -131  | -128  | -129  | -133  | -133  | -134   | -136  | -139  | -141  | -145  | -148  | -150  | -154  |       |
| 5.25                                                                                                                                                                                                                                                                                                                                                                                            | -166 | -134                                                                         | -128  | -128  | -129  | -131  | -132  | -134   | -137  | -139  | -141  | -144  | -148  | -151  | -154  |       |
| 5.3                                                                                                                                                                                                                                                                                                                                                                                             | -169 | -132                                                                         | -128  | -128  | -130  | -131  | -132  | -134   | -136  | -138  | -141  | -144  | -147  | -151  | -154  |       |
| 5.35                                                                                                                                                                                                                                                                                                                                                                                            | -162 | -132                                                                         | -128  | -128  | -129  | -131  | -133  | -134   | -137  | -140  | -141  | -144  | -147  | -151  | -154  |       |
| 5.4                                                                                                                                                                                                                                                                                                                                                                                             | -163 | -133                                                                         | -128  | -128  | -129  | -131  | -132  | -134   | -136  | -138  | -141  | -144  | -148  | -150  | -154  |       |
| 5.45                                                                                                                                                                                                                                                                                                                                                                                            | -165 | -132                                                                         | -128  | -128  | -129  | -131  | -135  | -134</ |       |       |       |       |       |       |       |       |
