# Supplementary material for: Mechanistic basis of post-treatment control of SIV after anti-α4β7 antibody therapy
Source: PubMed Central journal article supplement (PMC8189501; doi:10.1371/journal.pcbi.1009031), 2021-06-09
Supplement: pcbi.1009031.s007.pdf [file pcbi.1009031.s007.pdf]

**S4 Table:** The average AIC weight for the baseline effector cell source (BL) model, the saturated effector cell source (SS) model, and the effector cell source model dependent on antigen presenting cells (APCS).

| Group   | BL Model | SS Model | APCS Model |
|---------|----------|----------|------------|
| Control | 0.555    | 0.074    | 0.371      |
| Treated | 0.726    | 0.218    | 0.056      |
| All     | 0.646    | 0.151    | 0.203      |
