# Supplementary material for: Mechanistic basis of post-treatment control of SIV after anti-α4β7 antibody therapy
Source: PubMed Central journal article supplement (PMC8189501; doi:10.1371/journal.pcbi.1009031), 2021-06-09
Supplement: pcbi.1009031.s011.pdf [file pcbi.1009031.s011.pdf]

**S8 Table:** The AIC score for increased viral clearance, viral neutralization, protection, and improved antigen presentation mechanisms for the baseline effector cell source (BL) model, saturated source (SS) model, and antigen presenting cell source (APCS) model for macaque RSd14

| RSd14                                     |          |          |            |  |
|-------------------------------------------|----------|----------|------------|--|
| Mechanism                                 | BL Model | SS Model | APCS Model |  |
| Viral clearance                           | 101.56   | 118.96   | 153.40     |  |
| Virus neutralization                      | 111.10   | 122.21   | 141.20     |  |
| Protection                                | 103.18   | 118.46   | 120.90     |  |
| Antigen presentation                      | 104.90   | 99.50    | 113.83     |  |
| Antigen presentation with viral clearance | 105.66   | 104.95   | 116.50     |  |
