# Supplementary material for: Mechanistic basis of post-treatment control of SIV after anti-α4β7 antibody therapy
Source: PubMed Central journal article supplement (PMC8189501; doi:10.1371/journal.pcbi.1009031), 2021-06-09
Supplement: pcbi.1009031.s016.pdf [file pcbi.1009031.s016.pdf]

**S13 Table:** The AIC weight for the baseline effector cell source (BL) model, saturated source (SS) model, and antigen presenting cell source (APCS) model for the seven IgG control macaques.

| Model      | RBe14        | RIt11        | RKs13        | RSy13        | RYy13        | RLo14        | RUs14        | Average      |
|------------|--------------|--------------|--------------|--------------|--------------|--------------|--------------|--------------|
| BL Model   | 0.057        | <b>0.868</b> | <b>0.999</b> | <b>0.854</b> | <b>0.658</b> | 0.000        | 0.450        | <b>0.555</b> |
| SS Model   | 0.015        | 0.011        | 0.001        | 0.131        | 0.336        | 0.000        | 0.026        | 0.074        |
| APCS Model | <b>0.928</b> | 0.121        | 0.000        | 0.015        | 0.006        | <b>1.000</b> | <b>0.524</b> | 0.371        |
