# Supplementary material for: Mechanistic basis of post-treatment control of SIV after anti-α4β7 antibody therapy
Source: PubMed Central journal article supplement (PMC8189501; doi:10.1371/journal.pcbi.1009031), 2021-06-09
Supplement: pcbi.1009031.s017.pdf [file pcbi.1009031.s017.pdf]

**S14 Table:** The estimate parameters for the eight treated macaques using the increased viral clearance mechanism for the three different effector cell source models. The intervals specify the range of the set of intervals to approximate the 95% confidence intervals (S1 and S3 Text).

| Baseline source  |                     |                                 |                        |                                 |                                 |                                 |                     |                     |          |
|------------------|---------------------|---------------------------------|------------------------|---------------------------------|---------------------------------|---------------------------------|---------------------|---------------------|----------|
| Macaque          | $r_T$               | $m$                             | $p$                    | $K_B$                           | $K_P$                           | $\psi$                          | $\gamma$            | $\sigma$            | $\ln(L)$ |
| ROq14            | 0.23<br>(0.23–0.24) | 2.42E-07<br>(2.19E-07–2.49E-07) | 7049<br>( 6984– 7062)  | 4.25E-01<br>(3.80E-01–4.30E-01) | N/A                             | 8.78E-04<br>(8.63E-04–9.40E-04) | 4.82<br>(4.64–4.88) | 0.82<br>(0.79–0.84) | -44.67   |
| RDa15            | 0.17<br>(0.17–0.18) | 9.40E-07<br>(7.76E-07–1.25E-06) | 8433<br>( 8300– 8830)  | 1.36E-01<br>(1.18E-01–1.42E-01) | N/A                             | 1.84E-04<br>(1.74E-04–2.67E-04) | 4.74<br>(4.07–5.00) | 0.48<br>(0.47–0.56) | -23.41   |
| RFa15            | 0.34<br>(0.34–0.34) | 8.80E-06<br>(8.26E-06–8.85E-06) | 10980<br>(10968–11027) | 1.47E-01<br>(1.42E-01–1.55E-01) | N/A                             | 7.03E-04<br>(6.47E-04–7.19E-04) | 3.39<br>(3.32–3.44) | 0.48<br>(0.47–0.50) | -24.01   |
| RLn12            | 0.18<br>(0.18–0.18) | 1.39E-06<br>(1.09E-06–1.39E-06) | 8114<br>( 8071– 8155)  | 1.20E-01<br>(1.10E-01–1.26E-01) | N/A                             | 8.38E-04<br>(5.33E-04–9.41E-04) | 4.30<br>(3.92–4.36) | 0.41<br>(0.40–0.43) | -19.27   |
| RIId14           | 0.24<br>(0.24–0.25) | 5.39E-07<br>(4.35E-07–6.97E-07) | 8408<br>( 8270– 8492)  | 3.76E-01<br>(3.24E-01–3.92E-01) | N/A                             | 1.74E-04<br>(1.08E-04–2.00E-04) | 3.24<br>(3.20–3.43) | 1.18<br>(1.09–1.28) | -63.89   |
| ROo13            | 0.32<br>(0.31–0.32) | 3.32E-07<br>(2.66E-07–3.38E-07) | 7508<br>( 7323– 7512)  | 5.50E-01<br>(4.92E-01–6.12E-01) | N/A                             | 3.02E-04<br>(2.84E-04–3.55E-04) | 1.85<br>(1.74–1.91) | 0.99<br>(0.97–1.08) | -55.20   |
| RSd14            | 0.23<br>(0.23–0.23) | 5.49E-07<br>(4.55E-07–5.59E-07) | 7606<br>( 7299– 7609)  | 2.45E-01<br>(2.18E-01–2.71E-01) | N/A                             | 8.91E-05<br>(4.73E-05–9.98E-05) | 2.31<br>(2.27–2.34) | 0.77<br>(0.74–0.82) | -42.70   |
| ROv14            | 0.22<br>(0.21–0.22) | 4.04E-06<br>(3.88E-06–4.77E-06) | 9883<br>( 9862–10064)  | 1.31E-01<br>(8.81E-02–1.38E-01) | N/A                             | 9.58E-05<br>(3.18E-05–1.14E-04) | 2.72<br>(2.49–3.02) | 0.93<br>(0.91–1.05) | -51.86   |
| Saturated source |                     |                                 |                        |                                 |                                 |                                 |                     |                     |          |
| Macaque          | $r_T$               | $m$                             | $p$                    | $K_B$                           | $K_P$                           | $\psi$                          | $\gamma$            | $\sigma$            | $\ln(L)$ |
| ROq14            | 0.19<br>(0.18–0.20) | 2.42E-07<br>(2.03E-07–7.15E-07) | 7258<br>( 7100– 7709)  | 3.42E-01<br>(1.88E-01–3.45E-01) | 2.88E-04<br>(2.63E-04–3.13E-04) | 9.51E-04<br>(8.98E-04–1.00E-03) | 4.89<br>(4.81–5.00) | 0.85<br>(0.75–0.88) | -46.45   |
| RDa15            | 0.18<br>(0.17–0.18) | 1.04E-05<br>(8.61E-06–1.08E-05) | 8781<br>( 8700– 8793)  | 7.36E-02<br>(6.46E-02–7.94E-02) | 9.83E-02<br>(9.05E-02–1.00E-01) | 7.80E-05<br>(6.68E-05–9.54E-05) | 3.61<br>(3.54–3.80) | 0.52<br>(0.51–0.53) | -28.93   |
| RFa15            | 0.15<br>(0.14–0.15) | 2.92E-07<br>(1.87E-07–3.29E-07) | 6906<br>( 6856– 7097)  | 2.12E-01<br>(1.45E-01–2.16E-01) | 4.90E-05<br>(3.03E-05–5.92E-05) | 9.96E-04<br>(8.59E-04–1.00E-03) | 4.96<br>(4.75–5.00) | 0.56<br>(0.55–0.82) | -32.90   |
| RLn12            | 0.19<br>(0.19–0.19) | 1.81E-06<br>(1.40E-06–1.81E-06) | 8186<br>( 8162– 8289)  | 1.59E-01<br>(1.36E-01–1.71E-01) | 3.85E-04<br>(3.48E-04–4.26E-04) | 6.73E-04<br>(4.27E-04–7.12E-04) | 4.71<br>(4.24–4.82) | 0.43<br>(0.41–0.50) | -20.50   |
| RIId14           | 0.34<br>(0.33–0.36) | 1.03E-07<br>(7.70E-08–2.60E-07) | 6528<br>( 6373– 7049)  | 6.99E-01<br>(4.65E-01–6.99E-01) | 8.42E-03<br>(5.64E-03–1.10E-02) | 5.43E-04<br>(2.68E-04–1.00E-03) | 3.21<br>(2.95–3.85) | 1.19<br>(1.09–1.47) | -66.21   |
| ROo13            | 0.24<br>(0.24–0.31) | 1.14E-06<br>(7.51E-07–1.20E-06) | 8285<br>( 7023– 8330)  | 3.73E-01<br>(1.13E-01–3.75E-01) | 2.54E-04<br>(2.49E-04–8.71E-03) | 1.72E-04<br>(1.97E-06–2.34E-04) | 1.77<br>(1.74–4.98) | 1.06<br>(1.02–1.19) | -57.90   |
| RSd14            | 0.28<br>(0.27–0.28) | 9.44E-07<br>(8.65E-07–9.59E-07) | 7179<br>( 7095– 7203)  | 3.58E-01<br>(3.23E-01–3.64E-01) | 5.36E-02<br>(5.23E-02–5.78E-02) | 7.09E-04<br>(5.12E-04–8.44E-04) | 1.07<br>(1.07–1.08) | 0.83<br>(0.83–0.90) | -50.07   |
| ROv14            | 0.23<br>(0.22–0.31) | 2.04E-06<br>(1.79E-06–4.55E-06) | 8517<br>( 8475– 9138)  | 2.25E-01<br>(3.16E-02–2.56E-01) | 7.94E-05<br>(1.02E-05–4.25E-04) | 1.80E-05<br>(7.96E-06–1.32E-04) | 1.34<br>(1.34–4.92) | 1.07<br>(0.95–1.15) | -60.13   |
| APC source       |                     |                                 |                        |                                 |                                 |                                 |                     |                     |          |
| Macaque          | $r_T$               | $m$                             | $p$                    | $K_B$                           | $K_P$                           | $\psi$                          | $\gamma$            | $\sigma$            | $\ln(L)$ |
| ROq14            | 0.50<br>(0.47–0.50) | 1.59E-07<br>(1.20E-07–2.47E-07) | 4928<br>( 4845– 5034)  | 8.60E-01<br>(5.81E-01–8.63E-01) | N/A                             | 8.55E-04<br>(7.53E-04–1.00E-03) | 4.78<br>(4.54–5.00) | 0.79<br>(0.75–1.09) | -45.67   |
| RDa15            | 0.23<br>(0.22–0.24) | 9.44E-08<br>(9.42E-08–2.31E-07) | 7684<br>( 7659– 8488)  | 5.46E-01<br>(1.44E-01–5.46E-01) | N/A                             | 5.42E-04<br>(4.68E-04–1.00E-03) | 4.90<br>(4.72–5.00) | 0.62<br>(0.61–0.64) | -37.45   |
| RFa15            | 0.27<br>(0.26–0.27) | 5.54E-08<br>(4.49E-08–7.82E-08) | 4526<br>( 4387– 4527)  | 9.30E-01<br>(8.18E-01–9.30E-01) | N/A                             | 9.98E-04<br>(9.71E-04–1.00E-03) | 4.99<br>(4.90–5.00) | 0.65<br>(0.61–0.71) | -39.22   |
| RLn12            | 0.10<br>(0.09–0.10) | 4.77E-08<br>(4.08E-08–6.98E-08) | 4017<br>( 4000– 4072)  | 1.05E+00<br>(6.61E-01–1.05E+00) | N/A                             | 9.93E-04<br>(8.37E-04–1.00E-03) | 4.97<br>(4.43–5.00) | 0.57<br>(0.51–0.68) | -34.30   |
| RIId14           | 0.12<br>(0.12–0.12) | 9.23E-08<br>(8.67E-08–9.47E-08) | 6837<br>( 6817– 6843)  | 6.10E-01<br>(5.85E-01–6.16E-01) | N/A                             | 9.33E-04<br>(9.33E-04–9.84E-04) | 4.87<br>(4.82–4.93) | 1.35<br>(1.34–1.37) | -74.77   |
| ROo13            | 0.24<br>(0.24–0.24) | 2.43E-07<br>(2.32E-07–2.43E-07) | 4707<br>( 4705– 4709)  | 6.97E-01<br>(6.97E-01–7.20E-01) | N/A                             | 9.05E-04<br>(9.05E-04–9.33E-04) | 1.41<br>(1.41–1.43) | 1.29<br>(1.27–1.37) | -70.45   |
| RSd14            | 0.26<br>(0.09–0.26) | 2.44E-07<br>(5.57E-08–3.09E-07) | 4708<br>( 4000– 4718)  | 6.99E-01<br>(1.16E-01–8.71E-01) | N/A                             | 4.65E-04<br>(4.62E-04–1.00E-03) | 1.75<br>(1.75–5.00) | 1.34<br>(1.33–2.00) | -68.62   |
| ROv14            | 0.43<br>(0.40–0.45) | 2.62E-08<br>(1.95E-08–3.97E-08) | 4027<br>( 4000– 4071)  | 1.04E+00<br>(4.01E-01–1.05E+00) | N/A                             | 9.86E-04<br>(8.51E-04–1.00E-03) | 3.02<br>(2.98–3.98) | 1.63<br>(1.37–1.70) | -76.09   |
