# Supplementary material for: Mechanistic basis of post-treatment control of SIV after anti-α4β7 antibody therapy
Source: PubMed Central journal article supplement (PMC8189501; doi:10.1371/journal.pcbi.1009031), 2021-06-09
Supplement: pcbi.1009031.s018.pdf [file pcbi.1009031.s018.pdf]

**S15 Table:** The estimate parameters for the eight treated macaques using the viral neutralization mechanism for the three different effector cell source models. The intervals specify the range of the set of intervals to approximate the 95% confidence intervals (S1 and S3 Text).

| Baseline source  |                     |                                 |                        |                                 |                                 |                                 |                     |                     |          |  |
|------------------|---------------------|---------------------------------|------------------------|---------------------------------|---------------------------------|---------------------------------|---------------------|---------------------|----------|--|
| Macaque          | $r_T$               | $m$                             | $p$                    | $K_B$                           | $K_P$                           | $\psi$                          | $\gamma$            | $\sigma$            | $\ln(L)$ |  |
| ROq14            | 0.22<br>(0.22–0.23) | 4.04E-07<br>(3.58E-07–4.06E-07) | 7354<br>( 7353– 7396)  | 3.68E-01<br>(3.56E-01–3.74E-01) | N/A                             | 9.89E-04<br>(8.82E-04–1.00E-03) | 2.33<br>(2.25–2.70) | 0.80<br>(0.78–0.83) | -42.93   |  |
| RDa15            | 0.17<br>(0.16–0.18) | 9.65E-07<br>(8.61E-07–1.54E-06) | 8416<br>( 8234– 8899)  | 1.33E-01<br>(1.19E-01–1.49E-01) | N/A                             | 3.06E-04<br>(2.75E-04–5.48E-04) | 2.02<br>(1.00–2.14) | 0.47<br>(0.44–0.51) | -23.21   |  |
| RFa15            | 0.33<br>(0.33–0.34) | 6.85E-06<br>(6.36E-06–7.03E-06) | 10458<br>(10419–10544) | 1.56E-01<br>(1.47E-01–1.62E-01) | N/A                             | 8.04E-04<br>(7.52E-04–8.13E-04) | 1.00<br>(1.00–1.00) | 0.50<br>(0.49–0.51) | -27.02   |  |
| RLn12            | 0.19<br>(0.18–0.19) | 1.37E-06<br>(1.15E-06–1.37E-06) | 8107<br>( 8079– 8146)  | 1.31E-01<br>(1.30E-01–1.35E-01) | N/A                             | 6.11E-04<br>(5.99E-04–6.30E-04) | 3.22<br>(1.78–3.28) | 0.42<br>(0.42–0.44) | -19.84   |  |
| RIId14           | 0.33<br>(0.19–0.37) | 8.63E-08<br>(5.62E-08–1.06E-07) | 6635<br>( 6403– 6844)  | 6.88E-01<br>(2.74E-01–6.88E-01) | N/A                             | 9.79E-04<br>(6.72E-04–1.00E-03) | 1.00<br>(1.00–1.00) | 1.18<br>(1.14–1.61) | -63.35   |  |
| ROo13            | 0.28<br>(0.27–0.30) | 8.15E-08<br>(5.89E-08–8.48E-08) | 7105<br>( 6904– 7198)  | 6.42E-01<br>(4.22E-01–6.43E-01) | N/A                             | 9.88E-04<br>(8.93E-04–1.00E-03) | 1.00<br>(1.00–1.00) | 1.05<br>(1.01–1.25) | -57.36   |  |
| RSd14            | 0.25<br>(0.24–0.26) | 4.15E-07<br>(2.00E-07–4.70E-07) | 7230<br>( 6935– 7338)  | 2.79E-01<br>(1.91E-01–3.04E-01) | N/A                             | 6.08E-05<br>(4.98E-05–1.65E-04) | 1.00<br>(1.00–1.00) | 0.83<br>(0.74–1.05) | -47.47   |  |
| ROv14            | 0.25<br>(0.23–0.27) | 3.51E-07<br>(3.45E-07–1.85E-06) | 6968<br>( 6962– 9881)  | 2.32E-01<br>(1.19E-01–2.58E-01) | N/A                             | 9.00E-06<br>(8.30E-06–1.00E-03) | 1.00<br>(1.00–1.00) | 1.13<br>(1.09–1.45) | -64.07   |  |
| Saturated source |                     |                                 |                        |                                 |                                 |                                 |                     |                     |          |  |
| Macaque          | $r_T$               | $m$                             | $p$                    | $K_B$                           | $K_P$                           | $\psi$                          | $\gamma$            | $\sigma$            | $\ln(L)$ |  |
| ROq14            | 0.20<br>(0.20–0.20) | 8.11E-07<br>(7.90E-07–8.29E-07) | 8396<br>( 8371– 8423)  | 2.81E-01<br>(2.57E-01–2.81E-01) | 1.07E-04<br>(1.02E-04–1.15E-04) | 9.82E-04<br>(9.39E-04–1.00E-03) | 1.00<br>(1.00–1.00) | 0.78<br>(0.75–0.79) | -42.64   |  |
| RDa15            | 0.20<br>(0.18–0.21) | 1.70E-06<br>(1.45E-06–2.45E-06) | 7449<br>( 7299– 7587)  | 2.62E-01<br>(1.72E-01–2.70E-01) | 8.61E-02<br>(6.03E-02–1.00E-01) | 5.64E-04<br>(4.45E-04–9.33E-04) | 1.00<br>(1.00–1.00) | 0.58<br>(0.52–0.72) | -32.48   |  |
| RFa15            | 0.15<br>(0.15–0.16) | 2.16E-07<br>(1.53E-07–3.39E-07) | 7031<br>( 6768– 7072)  | 2.42E-01<br>(2.05E-01–2.44E-01) | 1.40E-05<br>(1.34E-05–1.73E-05) | 9.98E-04<br>(9.39E-04–1.00E-03) | 4.99<br>(2.09–5.00) | 0.61<br>(0.54–0.68) | -34.66   |  |
| RLn12            | 0.17<br>(0.16–0.18) | 3.30E-06<br>(2.13E-06–3.34E-06) | 7927<br>( 7695– 8016)  | 7.84E-02<br>(4.42E-02–8.72E-02) | 2.39E-02<br>(1.08E-02–2.84E-02) | 9.83E-04<br>(7.44E-04–1.00E-03) | 1.96<br>(1.00–2.05) | 0.49<br>(0.48–0.71) | -27.32   |  |
| RIId14           | 0.25<br>(0.24–0.29) | 3.02E-07<br>(1.29E-07–3.51E-07) | 8712<br>( 8463– 8934)  | 4.71E-01<br>(3.47E-01–5.01E-01) | 1.32E-05<br>(1.22E-05–4.84E-04) | 6.39E-04<br>(5.27E-04–1.00E-03) | 1.00<br>(1.00–1.00) | 1.18<br>(1.07–1.72) | -64.85   |  |
| ROo13            | 0.28<br>(0.26–0.28) | 8.18E-08<br>(5.72E-08–8.63E-08) | 7110<br>( 6728– 7265)  | 6.41E-01<br>(4.36E-01–6.42E-01) | 1.05E-05<br>(1.00E-05–1.57E-05) | 9.98E-04<br>(7.10E-04–1.00E-03) | 1.00<br>(1.00–1.00) | 1.06<br>(0.90–1.50) | -57.58   |  |
| RSd14            | 0.31<br>(0.27–0.53) | 2.22E-07<br>(5.77E-08–2.63E-07) | 6857<br>( 6427– 7194)  | 5.05E-01<br>(1.98E-01–5.63E-01) | 2.01E-05<br>(1.00E-05–2.23E-05) | 1.25E-04<br>(7.97E-05–5.00E-04) | 1.00<br>(1.00–1.00) | 0.88<br>(0.79–1.20) | -51.69   |  |
| ROv14            | 0.39<br>(0.27–0.39) | 5.93E-07<br>(5.93E-07–1.07E-05) | 8117<br>( 8095–11540)  | 2.27E-01<br>(9.74E-02–2.79E-01) | 1.21E-05<br>(1.15E-05–7.80E-02) | 7.21E-04<br>(6.64E-04–1.00E-03) | 1.00<br>(1.00–1.14) | 1.14<br>(1.14–1.64) | -65.12   |  |
| APC source       |                     |                                 |                        |                                 |                                 |                                 |                     |                     |          |  |
| Macaque          | $r_T$               | $m$                             | $p$                    | $K_B$                           | $K_P$                           | $\psi$                          | $\gamma$            | $\sigma$            | $\ln(L)$ |  |
| ROq14            | 0.51<br>(0.49–0.53) | 2.35E-07<br>(1.97E-07–3.34E-07) | 6848<br>( 6757– 7128)  | 3.54E-01<br>(2.94E-01–4.40E-01) | N/A                             | 9.99E-04<br>(9.70E-04–1.00E-03) | 1.00<br>(1.00–1.00) | 0.94<br>(0.88–1.03) | -54.31   |  |
| RDa15            | 0.31<br>(0.29–0.31) | 1.57E-07<br>(1.49E-07–1.91E-07) | 7117<br>( 7032– 7185)  | 5.35E-01<br>(4.55E-01–5.60E-01) | N/A                             | 9.99E-04<br>(8.71E-04–1.00E-03) | 1.00<br>(1.00–1.00) | 0.66<br>(0.64–0.80) | -39.44   |  |
| RFa15            | 0.51<br>(0.50–0.54) | 1.59E-07<br>(1.35E-07–3.06E-07) | 4607<br>( 4530– 4657)  | 2.83E-01<br>(2.32E-01–3.16E-01) | N/A                             | 1.00E-03<br>(9.77E-04–1.00E-03) | 5.00<br>(2.74–5.00) | 0.68<br>(0.61–0.71) | -38.76   |  |
| RLn12            | 0.52<br>(0.45–0.55) | 5.08E-08<br>(2.95E-08–7.18E-08) | 4243<br>( 4000– 4417)  | 4.45E-01<br>(2.84E-01–6.53E-01) | N/A                             | 1.00E-03<br>(8.77E-04–1.00E-03) | 5.00<br>(4.62–5.00) | 0.60<br>(0.55–0.87) | -36.14   |  |
| RIId14           | 0.37<br>(0.37–0.37) | 6.53E-08<br>(6.53E-08–6.53E-08) | 6870<br>( 6832– 6870)  | 4.54E-01<br>(4.54E-01–4.54E-01) | N/A                             | 9.97E-04<br>(9.97E-04–9.97E-04) | 4.63<br>(4.63–4.63) | 1.31<br>(1.27–1.31) | -72.87   |  |
| ROo13            | 0.41<br>(0.41–0.42) | 8.02E-08<br>(8.02E-08–8.13E-08) | 6314<br>( 6311– 6319)  | 3.79E-01<br>(3.75E-01–3.79E-01) | N/A                             | 9.94E-04<br>(9.94E-04–1.00E-03) | 4.86<br>(4.76–5.00) | 1.27<br>(1.27–1.28) | -67.63   |  |
| RSd14            | 0.41<br>(0.41–0.42) | 8.02E-08<br>(7.89E-08–8.28E-08) | 6314<br>( 6314– 6323)  | 3.79E-01<br>(3.79E-01–3.98E-01) | N/A                             | 9.94E-04<br>(9.85E-04–1.00E-03) | 4.86<br>(4.69–5.00) | 1.15<br>(1.15–1.16) | -62.52   |  |
| ROv14            | 0.52<br>(0.48–0.53) | 2.79E-08<br>(2.59E-08–5.67E-08) | 5041<br>( 5039– 5065)  | 8.32E-01<br>(5.96E-01–8.32E-01) | N/A                             | 7.60E-04<br>(7.60E-04–1.00E-03) | 4.43<br>(4.43–5.00) | 1.47<br>(1.27–1.49) | -74.47   |  |
