# Supplementary material for: Mechanistic basis of post-treatment control of SIV after anti-α4β7 antibody therapy
Source: PubMed Central journal article supplement (PMC8189501; doi:10.1371/journal.pcbi.1009031), 2021-06-09
Supplement: pcbi.1009031.s019.pdf [file pcbi.1009031.s019.pdf]

**S16 Table:** The estimate parameters for the eight treated macaques using the protection mechanism for the three different effector cell source models. The intervals specify the range of the set of intervals to approximate the 95% confidence intervals (S1 and S3 Text).

| Baseline source  |                     |                                 |                        |                                 |                                 |                        |                                 |                     |          |
|------------------|---------------------|---------------------------------|------------------------|---------------------------------|---------------------------------|------------------------|---------------------------------|---------------------|----------|
| Macaque          | $r_T$               | $m$                             | $p$                    | $K_B$                           | $K_P$                           | $\omega$               | $\rho$                          | $\sigma$            | $\ln(L)$ |
| ROq14            | 0.22<br>(0.22–0.23) | 1.25E-05<br>(1.05E-05–1.28E-05) | 11839<br>(11746–12061) | 1.13E-01<br>(1.03E-01–1.23E-01) | N/A                             | 18.01<br>(17.18–18.78) | 6.67E-02<br>(4.64E-02–2.35E-01) | 0.92<br>(0.88–0.97) | -47.71   |
| RDa15            | 0.35<br>(0.30–0.36) | 4.37E-06<br>(3.68E-06–8.13E-06) | 9688<br>(9605–12194)   | 2.26E-01<br>(1.58E-01–2.63E-01) | N/A                             | 68.33<br>(2.18–71.80)  | 7.16E-02<br>(2.90E-02–1.39E-01) | 0.67<br>(0.54–0.71) | -38.40   |
| RFa15            | 0.17<br>(0.17–0.17) | 1.36E-06<br>(1.17E-06–1.42E-06) | 8304<br>(8145–8375)    | 2.03E-01<br>(1.70E-01–2.04E-01) | N/A                             | 0.89<br>(0.84–0.93)    | 2.11E-02<br>(1.47E-02–3.44E-02) | 0.31<br>(0.29–0.36) | -9.90    |
| RLn12            | 0.18<br>(0.18–0.19) | 1.08E-06<br>(9.04E-07–1.12E-06) | 7863<br>(7832–7984)    | 1.29E-01<br>(1.22E-01–1.38E-01) | N/A                             | 0.63<br>(0.60–0.65)    | 2.19E-02<br>(1.49E-02–2.83E-02) | 0.37<br>(0.37–0.38) | -13.82   |
| RIId14           | 0.25<br>(0.25–0.26) | 1.23E-07<br>(1.20E-07–1.31E-07) | 8159<br>(8094–8221)    | 5.59E-01<br>(4.57E-01–5.59E-01) | N/A                             | 0.46<br>(0.44–0.48)    | 8.29E-03<br>(7.17E-03–9.93E-03) | 1.21<br>(1.19–1.35) | -64.09   |
| ROo13            | 0.26<br>(0.26–0.26) | 2.06E-06<br>(1.99E-06–2.06E-06) | 10030<br>(10016–10031) | 2.24E-01<br>(2.19E-01–2.29E-01) | N/A                             | 1.55<br>(1.54–1.56)    | 3.18E-03<br>(3.18E-03–3.23E-03) | 1.09<br>(1.09–1.10) | -60.80   |
| RSd14            | 0.21<br>(0.21–0.21) | 1.30E-06<br>(8.91E-07–1.33E-06) | 8573<br>(8530–8667)    | 2.06E-01<br>(1.99E-01–2.19E-01) | N/A                             | 4.22<br>(4.16–4.32)    | 1.24E-03<br>(1.17E-03–2.28E-03) | 0.77<br>(0.75–0.82) | -43.51   |
| ROv14            | 0.26<br>(0.26–0.26) | 1.49E-07<br>(1.38E-07–1.60E-07) | 8501<br>(8470–8553)    | 2.25E-01<br>(2.15E-01–2.34E-01) | N/A                             | 0.44<br>(0.44–0.45)    | 1.05E-03<br>(8.27E-04–1.17E-03) | 0.91<br>(0.87–0.93) | -52.43   |
| Saturated source |                     |                                 |                        |                                 |                                 |                        |                                 |                     |          |
| Macaque          | $r_T$               | $m$                             | $p$                    | $K_B$                           | $K_P$                           | $\omega$               | $\rho$                          | $\sigma$            | $\ln(L)$ |
| ROq14            | 0.28<br>(0.25–0.28) | 1.11E-06<br>(1.08E-06–9.05E-06) | 10021<br>(9969–10123)  | 4.04E-01<br>(9.23E-02–4.04E-01) | 1.00E-05<br>(1.00E-05–1.71E-03) | 11.90<br>(11.79–67.27) | 3.00E-02<br>(2.63E-02–1.42E-01) | 0.91<br>(0.90–1.38) | -51.41   |
| RDa15            | 0.23<br>(0.22–0.23) | 2.33E-06<br>(2.03E-06–2.36E-06) | 7714<br>(7629–7737)    | 2.85E-01<br>(2.57E-01–2.87E-01) | 9.99E-02<br>(9.96E-02–1.00E-01) | 0.64<br>(0.62–0.65)    | 1.06E-02<br>(8.06E-03–1.40E-02) | 0.62<br>(0.61–0.64) | -34.32   |
| RFa15            | 0.15<br>(0.15–0.16) | 2.33E-06<br>(2.13E-06–2.48E-06) | 7780<br>(7763–7880)    | 1.56E-01<br>(1.13E-01–1.59E-01) | 2.72E-02<br>(2.63E-02–3.02E-02) | 4.00<br>(3.88–4.18)    | 1.96E-02<br>(1.29E-02–3.07E-02) | 0.37<br>(0.37–0.39) | -16.60   |
| RLn12            | 0.19<br>(0.19–0.19) | 1.85E-06<br>(1.49E-06–1.89E-06) | 7706<br>(7696–7920)    | 1.42E-01<br>(1.34E-01–1.51E-01) | 1.27E-02<br>(1.22E-02–1.36E-02) | 0.69<br>(0.65–0.73)    | 2.07E-02<br>(1.38E-02–2.91E-02) | 0.38<br>(0.35–0.39) | -13.95   |
| RIId14           | 0.25<br>(0.25–0.26) | 1.23E-07<br>(1.11E-07–1.56E-07) | 8159<br>(8082–8221)    | 5.59E-01<br>(5.01E-01–5.59E-01) | 1.00E-05<br>(1.00E-05–1.05E-05) | 0.46<br>(0.45–0.48)    | 8.31E-03<br>(6.22E-03–1.02E-02) | 1.21<br>(1.18–1.25) | -64.23   |
| ROo13            | 0.30<br>(0.30–0.30) | 7.56E-07<br>(6.98E-07–7.67E-07) | 7836<br>(7800–7863)    | 4.73E-01<br>(4.57E-01–4.75E-01) | 9.52E-05<br>(9.44E-05–9.75E-05) | 1.15<br>(1.13–1.17)    | 7.03E-04<br>(7.03E-04–9.91E-04) | 0.95<br>(0.93–0.98) | -54.32   |
| RSd14            | 0.23<br>(0.23–0.23) | 9.55E-07<br>(7.76E-07–9.58E-07) | 8008<br>(7993–8043)    | 3.46E-01<br>(3.08E-01–3.46E-01) | 2.58E-04<br>(2.55E-04–2.85E-04) | 13.26<br>(12.94–13.51) | 9.18E-04<br>(8.64E-04–1.59E-03) | 0.82<br>(0.81–0.85) | -49.82   |
| ROv14            | 0.26<br>(0.26–0.26) | 2.96E-07<br>(2.65E-07–3.16E-07) | 8459<br>(8391–8477)    | 2.38E-01<br>(2.31E-01–2.44E-01) | 4.65E-02<br>(4.48E-02–4.96E-02) | 0.44<br>(0.44–0.46)    | 1.00E-03<br>(7.95E-04–1.12E-03) | 0.90<br>(0.88–0.95) | -52.27   |
| APC source       |                     |                                 |                        |                                 |                                 |                        |                                 |                     |          |
| Macaque          | $r_T$               | $m$                             | $p$                    | $K_B$                           | $K_P$                           | $\omega$               | $\rho$                          | $\sigma$            | $\ln(L)$ |
| ROq14            | 0.45<br>(0.45–0.46) | 1.33E-07<br>(1.25E-07–1.64E-07) | 5024<br>(4963–5057)    | 8.42E-01<br>(7.96E-01–8.42E-01) | N/A                             | 2.44<br>(2.37–2.51)    | 1.19E-02<br>(8.67E-03–1.52E-02) | 0.74<br>(0.73–0.76) | -42.86   |
| RDa15            | 0.51<br>(0.51–0.52) | 9.25E-08<br>(9.06E-08–1.00E-07) | 5251<br>(5188–5279)    | 8.02E-01<br>(7.61E-01–8.02E-01) | N/A                             | 0.45<br>(0.45–0.47)    | 1.27E-02<br>(1.07E-02–1.74E-02) | 0.61<br>(0.60–0.63) | -35.61   |
| RFa15            | 0.55<br>(0.35–0.55) | 9.99E-08<br>(6.82E-08–1.62E-07) | 5454<br>(5004–5852)    | 3.26E-01<br>(2.38E-01–7.84E-01) | N/A                             | 0.86<br>(0.52–7.19)    | 5.90E-02<br>(2.81E-02–4.75E+00) | 0.44<br>(0.42–0.62) | -24.20   |
| RLn12            | 0.55<br>(0.39–0.55) | 5.32E-08<br>(3.74E-08–8.49E-08) | 5016<br>(4845–5260)    | 2.87E-01<br>(1.75E-01–5.01E-01) | N/A                             | 5.91<br>(4.09–8.31)    | 7.32E-02<br>(3.84E-02–4.75E+00) | 0.38<br>(0.34–0.64) | -18.90   |
| RIId14           | 0.35<br>(0.09–0.53) | 3.89E-08<br>(2.95E-08–9.85E-08) | 5934<br>(5563–8287)    | 7.00E-01<br>(2.86E-01–7.08E-01) | N/A                             | 78.00<br>(0.44–78.00)  | 1.17E-01<br>(3.46E-02–4.75E+00) | 1.44<br>(1.30–2.00) | -72.05   |
| ROo13            | 0.51<br>(0.50–0.52) | 2.97E-08<br>(2.36E-08–4.65E-08) | 5463<br>(5413–5495)    | 7.68E-01<br>(4.26E-01–7.69E-01) | N/A                             | 0.50<br>(0.47–0.52)    | 2.11E-02<br>(2.09E-02–3.65E-02) | 1.07<br>(1.05–1.50) | -58.39   |
| RSd14            | 0.49<br>(0.46–0.49) | 3.82E-08<br>(2.98E-08–5.05E-08) | 5542<br>(5409–5671)    | 7.57E-01<br>(4.57E-01–7.57E-01) | N/A                             | 0.45<br>(0.44–0.86)    | 2.03E-02<br>(2.03E-02–3.61E-02) | 0.98<br>(0.94–1.24) | -52.37   |
| ROv14            | 0.35<br>(0.34–0.55) | 3.90E-08<br>(3.31E-08–7.62E-08) | 6605<br>(6517–7412)    | 6.35E-01<br>(2.24E-01–6.35E-01) | N/A                             | 0.52<br>(0.48–0.73)    | 3.04E-02<br>(4.55E-03–4.75E+00) | 1.23<br>(1.13–1.49) | -69.15   |
