# Supplementary material for: Mechanistic basis of post-treatment control of SIV after anti-α4β7 antibody therapy
Source: PubMed Central journal article supplement (PMC8189501; doi:10.1371/journal.pcbi.1009031), 2021-06-09
Supplement: pcbi.1009031.s020.pdf [file pcbi.1009031.s020.pdf]

**S17 Table:** The estimate parameters for the eight treated macaques using the increased antigen presentation mechanism for the three different effector cell source models. The intervals specify the range of the set of intervals to approximate the 95% confidence intervals (S1 and S3 Text).

| Baseline source  |                     |                                 |                        |                                 |                                 |                                 |                                 |                     |          |  |
|------------------|---------------------|---------------------------------|------------------------|---------------------------------|---------------------------------|---------------------------------|---------------------------------|---------------------|----------|--|
| Macaque          | $r_T$               | $m$                             | $p$                    | $K_B$                           | $K_P$                           | $\psi$                          | $\Omega$                        | $\sigma$            | $\ln(L)$ |  |
| ROq14            | 0.46<br>(0.44–0.47) | 2.52E-05<br>(2.14E-05–2.52E-05) | 13984<br>(13897–14202) | 1.33E-01<br>(1.05E-01–1.83E-01) | N/A                             | N/A                             | 1.00E-08<br>(1.00E-08–5.38E-06) | 0.85<br>(0.76–0.88) | -48.87   |  |
| RDa15            | 0.21<br>(0.21–0.21) | 1.80E-07<br>(1.68E-07–1.96E-07) | 6906<br>( 6854– 6956)  | 3.88E-01<br>(3.33E-01–3.92E-01) | N/A                             | N/A                             | 2.54E-01<br>(1.93E-01–6.57E-01) | 0.60<br>(0.59–0.65) | -34.35   |  |
| RFa15            | 0.16<br>(0.16–0.24) | 2.89E-06<br>(2.12E-06–2.09E-05) | 9047<br>( 8828–13246)  | 1.36E-01<br>(3.03E-02–1.41E-01) | N/A                             | N/A                             | 4.61E-01<br>(2.14E-07–5.29E+00) | 0.58<br>(0.55–0.83) | -34.81   |  |
| RLn12            | 0.32<br>(0.21–0.43) | 6.69E-06<br>(1.35E-06–2.79E-05) | 10367<br>( 8199–15000) | 8.21E-02<br>(1.05E-02–1.51E-01) | N/A                             | N/A                             | 1.00E-08<br>(1.00E-08–5.62E+00) | 0.71<br>(0.68–1.12) | -42.03   |  |
| RIId14           | 0.36<br>(0.31–0.55) | 5.48E-07<br>(3.79E-08–2.49E-06) | 7901<br>( 5961– 9857)  | 5.54E-01<br>(8.97E-02–5.97E-01) | N/A                             | N/A                             | 2.70E-01<br>(1.71E-08–2.07E+00) | 1.32<br>(1.13–1.80) | -69.45   |  |
| ROo13            | 0.32<br>(0.31–0.32) | 2.19E-07<br>(2.07E-07–2.38E-07) | 7163<br>( 7117– 7219)  | 6.23E-01<br>(4.82E-01–6.23E-01) | N/A                             | N/A                             | 5.60E-02<br>(2.85E-02–6.72E-02) | 0.88<br>(0.86–0.94) | -50.44   |  |
| RSd14            | 0.23<br>(0.20–0.27) | 4.69E-07<br>(3.39E-07–6.76E-07) | 7758<br>( 7434– 8179)  | 3.02E-01<br>(1.97E-01–4.00E-01) | N/A                             | N/A                             | 1.74E-05<br>(3.83E-07–3.23E-05) | 0.77<br>(0.69–1.05) | -45.66   |  |
| ROv14            | 0.20<br>(0.20–0.31) | 6.74E-08<br>(6.02E-08–5.37E-06) | 7986<br>( 7129–11489)  | 4.10E-01<br>(1.24E-01–4.13E-01) | N/A                             | N/A                             | 1.48E-01<br>(8.36E-05–1.58E+02) | 1.06<br>(1.03–1.37) | -58.35   |  |
| Saturated source |                     |                                 |                        |                                 |                                 |                                 |                                 |                     |          |  |
| Macaque          | $r_T$               | $m$                             | $p$                    | $K_B$                           | $K_P$                           | $\psi$                          | $\Omega$                        | $\sigma$            | $\ln(L)$ |  |
| ROq14            | 0.51<br>(0.36–0.54) | 2.60E-05<br>(2.06E-05–2.82E-05) | 13983<br>(11889–14699) | 1.33E-01<br>(7.94E-02–2.11E-01) | 1.16E-05<br>(1.00E-05–1.09E-02) | N/A                             | 1.23E-02<br>(2.18E-05–3.88E+01) | 0.88<br>(0.73–1.23) | -50.80   |  |
| RDa15            | 0.15<br>(0.15–0.15) | 5.23E-06<br>(5.15E-06–5.26E-06) | 8073<br>( 8057– 8086)  | 9.50E-02<br>(9.39E-02–9.62E-02) | 6.00E-02<br>(5.87E-02–6.05E-02) | N/A                             | 7.72E+03<br>(6.76E+03–8.03E+03) | 0.53<br>(0.52–0.53) | -32.84   |  |
| RFa15            | 0.16<br>(0.14–0.45) | 8.27E-06<br>(1.50E-06–4.04E-05) | 8760<br>( 8208–12601)  | 2.95E-02<br>(1.71E-02–4.38E-02) | 2.58E-02<br>(2.14E-05–1.00E-01) | N/A                             | 2.32E-01<br>(1.59E-07–1.19E+00) | 0.69<br>(0.61–1.14) | -39.74   |  |
| RLn12            | 0.24<br>(0.21–0.41) | 1.52E-05<br>(1.24E-06–1.96E-05) | 8431<br>( 8031– 9399)  | 1.81E-02<br>(1.52E-02–1.22E-01) | 1.00E-01<br>(1.52E-05–1.00E-01) | N/A                             | 3.92E-04<br>(1.29E-05–2.94E+01) | 0.67<br>(0.61–1.07) | -38.17   |  |
| RIId14           | 0.17<br>(0.17–0.33) | 5.81E-08<br>(5.81E-08–1.74E-06) | 9161<br>( 7482– 9839)  | 1.18E-01<br>(5.41E-02–2.25E-01) | 1.40E-05<br>(1.36E-05–1.16E-02) | N/A                             | 1.50E+01<br>(2.26E-06–3.27E+02) | 1.26<br>(1.03–1.63) | -66.93   |  |
| ROo13            | 0.32<br>(0.31–0.32) | 2.45E-07<br>(2.37E-07–2.54E-07) | 7152<br>( 7117– 7169)  | 6.13E-01<br>(5.50E-01–6.13E-01) | 6.00E-04<br>(5.90E-04–6.31E-04) | N/A                             | 2.35E-01<br>(1.62E-01–2.87E-01) | 0.87<br>(0.86–0.93) | -49.78   |  |
| RSd14            | 0.26<br>(0.26–0.27) | 1.59E-06<br>(1.35E-06–1.68E-06) | 7354<br>( 7191– 7442)  | 2.46E-01<br>(1.96E-01–2.48E-01) | 6.45E-02<br>(6.03E-02–6.61E-02) | N/A                             | 8.32E+03<br>(3.29E+03–9.33E+03) | 0.72<br>(0.71–0.79) | -41.67   |  |
| ROv14            | 0.27<br>(0.26–0.37) | 3.72E-07<br>(2.71E-07–6.58E-06) | 10696<br>(10568–10976) | 3.70E-01<br>(3.13E-01–3.93E-01) | 1.05E-05<br>(1.00E-05–1.40E-02) | N/A                             | 9.56E+01<br>(3.72E-04–4.15E+02) | 0.86<br>(0.72–1.15) | -53.13   |  |
| APC source       |                     |                                 |                        |                                 |                                 |                                 |                                 |                     |          |  |
| Macaque          | $r_T$               | $m$                             | $p$                    | $K_B$                           | $K_P$                           | $\psi$                          | $\Omega$                        | $\sigma$            | $\ln(L)$ |  |
| ROq14            | 0.17<br>(0.17–0.17) | 6.42E-08<br>(6.42E-08–6.76E-08) | 4081<br>( 4080– 4081)  | 1.03E+00<br>(1.03E+00–1.03E+00) | N/A                             | 3.24E-04<br>(3.09E-04–3.24E-04) | 1.48E+01<br>(1.45E+01–1.48E+01) | 0.93<br>(0.93–0.93) | -51.40   |  |
| RDa15            | 0.45<br>(0.45–0.45) | 5.62E-08<br>(5.62E-08–5.62E-08) | 4523<br>( 4523– 4523)  | 9.31E-01<br>(9.31E-01–9.31E-01) | N/A                             | 7.46E-04<br>(7.46E-04–7.46E-04) | 7.78E+00<br>(7.78E+00–7.78E+00) | 0.57<br>(0.57–0.58) | -34.63   |  |
| RFa15            | 0.55<br>(0.55–0.55) | 9.82E-08<br>(9.82E-08–1.02E-07) | 4906<br>( 4906– 4909)  | 4.08E-01<br>(4.08E-01–4.17E-01) | N/A                             | 1.00E-03<br>(9.33E-04–1.00E-03) | 4.00E+01<br>(3.27E+01–4.00E+01) | 0.46<br>(0.46–0.47) | -25.73   |  |
| RLn12            | 0.39<br>(0.39–0.39) | 7.24E-08<br>(6.76E-08–7.24E-08) | 4541<br>( 4535– 4541)  | 3.95E-01<br>(3.80E-01–3.95E-01) | N/A                             | 1.00E-03<br>(9.33E-04–1.00E-03) | 4.00E+01<br>(3.27E+01–4.00E+01) | 0.38<br>(0.38–0.38) | -20.94   |  |
| RIId14           | 0.34<br>(0.34–0.34) | 3.26E-08<br>(3.26E-08–3.26E-08) | 4762<br>( 4762– 4781)  | 8.49E-01<br>(8.49E-01–8.71E-01) | N/A                             | 9.99E-04<br>(9.33E-04–9.99E-04) | 1.56E+00<br>(1.56E+00–1.56E+00) | 1.32<br>(1.32–1.34) | -72.24   |  |
| ROo13            | 0.25<br>(0.25–0.25) | 4.70E-08<br>(4.70E-08–4.70E-08) | 7317<br>( 7299– 7317)  | 5.73E-01<br>(5.50E-01–5.73E-01) | N/A                             | 4.33E-04<br>(4.07E-04–4.33E-04) | 2.58E+00<br>(2.58E+00–2.58E+00) | 1.03<br>(1.02–1.03) | -61.30   |  |
| RSd14            | 0.55<br>(0.55–0.55) | 5.20E-08<br>(5.13E-08–5.20E-08) | 5707<br>( 5678– 5707)  | 2.79E-01<br>(2.79E-01–2.88E-01) | N/A                             | 2.05E-05<br>(1.95E-05–2.05E-05) | 3.97E+01<br>(3.97E+01–3.97E+01) | 0.85<br>(0.83–0.85) | -48.84   |  |
| ROv14            | 0.50<br>(0.50–0.50) | 5.89E-08<br>(5.89E-08–6.31E-08) | 5916<br>( 5907– 5916)  | 2.84E-01<br>(2.84E-01–2.88E-01) | N/A                             | 3.86E-04<br>(3.86E-04–4.07E-04) | 2.85E+00<br>(2.85E+00–2.87E+00) | 1.05<br>(1.03–1.05) | -58.78   |  |
