# Supplementary material for: Mechanistic basis of post-treatment control of SIV after anti-α4β7 antibody therapy
Source: PubMed Central journal article supplement (PMC8189501; doi:10.1371/journal.pcbi.1009031), 2021-06-09
Supplement: pcbi.1009031.s021.pdf [file pcbi.1009031.s021.pdf]

**S18 Table:** The estimate parameters for the eight treated macaques using the increased antigen presentation mechanism with increased viral clearance for the three different effector cell source models. The intervals specify the range of the set of intervals to approximate the 95% confidence intervals (S1 and S3 Text).

| Baseline source  |                     |                                 |                        |                                 |                                 |                                 |                     |                                 |                     |          |
|------------------|---------------------|---------------------------------|------------------------|---------------------------------|---------------------------------|---------------------------------|---------------------|---------------------------------|---------------------|----------|
| Macaque          | $r_T$               | $m$                             | $p$                    | $K_B$                           | $K_P$                           | $\psi$                          | $\gamma$            | $\Omega$                        | $\sigma$            | $\ln(L)$ |
| ROq14            | 0.23<br>(0.23–0.24) | 2.42E-07<br>(2.10E-07–2.77E-07) | 7049<br>( 7003– 7165)  | 4.25E-01<br>(3.68E-01–4.25E-01) | N/A                             | 8.79E-04<br>(8.32E-04–9.33E-04) | 4.82<br>(4.78–5.00) | 6.17E+05<br>(3.76E+05–7.21E+05) | 0.82<br>(0.79–0.88) | -44.67   |
| RDa15            | 0.17<br>(0.16–0.17) | 9.36E-07<br>(8.69E-07–1.02E-06) | 8433<br>( 8413– 8553)  | 1.36E-01<br>(1.25E-01–1.52E-01) | N/A                             | 1.85E-04<br>(1.68E-04–2.04E-04) | 4.74<br>(4.42–5.00) | 6.56E+04<br>(4.90E+04–1.91E+05) | 0.48<br>(0.44–0.50) | -23.41   |
| RFa15            | 0.17<br>(0.17–0.17) | 5.57E-06<br>(5.33E-06–5.58E-06) | 10073<br>(10036–10088) | 1.14E-01<br>(1.04E-01–1.16E-01) | N/A                             | 8.54E-04<br>(8.13E-04–9.33E-04) | 2.40<br>(2.18–2.54) | 6.76E-04<br>(6.03E-04–6.76E-04) | 0.49<br>(0.49–0.50) | -23.32   |
| RLn12            | 0.18<br>(0.17–0.18) | 1.71E-06<br>(1.34E-06–1.72E-06) | 8346<br>( 8334– 8461)  | 1.14E-01<br>(1.04E-01–1.27E-01) | N/A                             | 9.34E-04<br>(7.67E-04–1.00E-03) | 4.49<br>(3.30–5.00) | 5.89E-01<br>(4.19E-01–8.94E-01) | 0.39<br>(0.37–0.42) | -17.30   |
| RIId14           | 0.27<br>(0.27–0.27) | 3.11E-07<br>(2.10E-07–4.64E-07) | 8413<br>( 7701– 8466)  | 5.43E-01<br>(3.27E-01–5.43E-01) | N/A                             | 1.13E-04<br>(1.00E-09–1.30E-04) | 4.58<br>(1.00–5.00) | 6.95E+01<br>(4.45E-08–8.04E+01) | 1.16<br>(1.10–1.60) | -63.00   |
| ROo13            | 0.32<br>(0.31–0.33) | 2.19E-07<br>(1.98E-07–2.75E-07) | 7163<br>( 7050– 7299)  | 6.23E-01<br>(4.16E-01–6.28E-01) | N/A                             | 1.00E-06<br>(5.97E-07–1.49E-06) | 1.00<br>(1.00–1.00) | 5.62E-02<br>(1.45E-02–2.63E-01) | 0.88<br>(0.83–1.04) | -50.44   |
| RSd14            | 0.23<br>(0.21–0.35) | 3.47E-07<br>(1.95E-07–5.13E-07) | 7517<br>( 7365– 7827)  | 3.12E-01<br>(2.39E-01–3.80E-01) | N/A                             | 8.42E-05<br>(6.02E-08–8.96E-05) | 1.72<br>(1.00–5.00) | 3.66E+01<br>(2.22E-08–6.12E+01) | 0.76<br>(0.71–1.08) | -43.42   |
| ROv14            | 0.22<br>(0.22–0.22) | 4.07E-06<br>(3.93E-06–4.37E-06) | 9885<br>( 9812– 9927)  | 1.31E-01<br>(1.26E-01–1.41E-01) | N/A                             | 9.63E-05<br>(8.57E-05–9.71E-05) | 2.64<br>(1.83–3.18) | 8.03E+05<br>(4.30E+05–8.51E+05) | 0.92<br>(0.90–0.93) | -51.85   |
| Saturated source |                     |                                 |                        |                                 |                                 |                                 |                     |                                 |                     |          |
| Macaque          | $r_T$               | $m$                             | $p$                    | $K_B$                           | $K_P$                           | $\psi$                          | $\gamma$            | $\Omega$                        | $\sigma$            | $\ln(L)$ |
| ROq14            | 0.19<br>(0.17–0.19) | 2.28E-07<br>(1.18E-07–2.95E-07) | 7267<br>( 7110– 7494)  | 3.35E-01<br>(2.49E-01–3.51E-01) | 1.38E-05<br>(1.16E-05–1.65E-05) | 9.67E-04<br>(8.67E-04–1.00E-03) | 4.85<br>(4.74–5.00) | 2.16E+05<br>(1.55E+05–1.00E+06) | 0.85<br>(0.75–0.97) | -46.65   |
| RDa15            | 0.18<br>(0.18–0.18) | 1.02E-05<br>(9.33E-06–1.09E-05) | 8789<br>( 8706– 8838)  | 7.68E-02<br>(7.58E-02–8.96E-02) | 9.84E-02<br>(9.55E-02–1.00E-01) | 7.90E-05<br>(5.83E-05–8.05E-05) | 3.55<br>(2.11–5.00) | 1.65E+05<br>(3.39E+04–4.23E+05) | 0.52<br>(0.51–0.54) | -28.93   |
| RFa15            | 0.15<br>(0.15–0.15) | 4.15E-07<br>(3.72E-07–4.24E-07) | 7004<br>( 6985– 7121)  | 2.21E-01<br>(1.91E-01–2.21E-01) | 5.88E-03<br>(5.72E-03–6.35E-03) | 8.66E-04<br>(7.08E-04–9.33E-04) | 4.24<br>(3.93–5.00) | 1.41E-05<br>(1.02E-05–1.97E-05) | 0.43<br>(0.42–0.47) | -22.49   |
| RLn12            | 0.19<br>(0.18–0.19) | 1.81E-06<br>(1.38E-06–1.81E-06) | 8186<br>( 8006– 8330)  | 1.59E-01<br>(8.15E-02–1.80E-01) | 3.85E-04<br>(3.18E-04–5.10E-04) | 6.73E-04<br>(5.89E-04–7.69E-04) | 4.71<br>(2.78–5.00) | 5.77E+05<br>(1.40E+05–1.00E+06) | 0.43<br>(0.42–0.49) | -20.49   |
| RIId14           | 0.34<br>(0.27–0.36) | 1.03E-07<br>(4.70E-08–1.15E-07) | 6528<br>( 6401– 6706)  | 6.99E-01<br>(3.89E-01–6.99E-01) | 8.42E-03<br>(5.50E-04–1.26E-02) | 5.43E-04<br>(3.09E-04–1.00E-03) | 3.21<br>(1.00–5.00) | 8.51E+05<br>(1.82E-02–1.00E+06) | 1.19<br>(0.98–1.51) | -66.21   |
| ROo13            | 0.32<br>(0.31–0.32) | 2.43E-07<br>(2.17E-07–2.62E-07) | 7152<br>( 7039– 7207)  | 6.13E-01<br>(4.58E-01–6.16E-01) | 5.18E-04<br>(4.71E-04–5.76E-04) | 9.95E-07<br>(8.69E-07–1.15E-06) | 1.00<br>(1.00–1.00) | 2.40E-01<br>(9.33E-02–8.68E-01) | 0.87<br>(0.80–1.01) | -49.78   |
| RSd14            | 0.26<br>(0.26–0.27) | 1.59E-06<br>(1.34E-06–1.69E-06) | 7354<br>( 7265– 7391)  | 2.46E-01<br>(2.28E-01–2.69E-01) | 6.45E-02<br>(6.08E-02–7.39E-02) | 8.92E-07<br>(7.83E-07–1.09E-06) | 1.00<br>(1.00–1.00) | 8.32E+03<br>(2.20E+03–9.33E+03) | 0.72<br>(0.68–0.79) | -41.67   |
| ROv14            | 0.27<br>(0.26–0.27) | 3.84E-07<br>(2.95E-07–5.44E-07) | 10688<br>(10568–11128) | 3.58E-01<br>(2.63E-01–3.70E-01) | 1.25E-05<br>(1.00E-05–1.43E-05) | 1.00E-06<br>(8.59E-07–1.40E-06) | 1.00<br>(1.00–1.00) | 2.91E+02<br>(7.70E+01–3.87E+02) | 0.86<br>(0.79–0.98) | -53.13   |
| APC source       |                     |                                 |                        |                                 |                                 |                                 |                     |                                 |                     |          |
| Macaque          | $r_T$               | $m$                             | $p$                    | $K_B$                           | $K_P$                           | $\psi$                          | $\gamma$            | $\Omega$                        | $\sigma$            | $\ln(L)$ |
| ROq14            | 0.50<br>(0.48–0.55) | 1.59E-07<br>(1.34E-07–2.68E-07) | 4928<br>( 4717– 4990)  | 8.60E-01<br>(5.21E-01–8.61E-01) | N/A                             | 8.55E-04<br>(7.71E-04–1.00E-03) | 4.78<br>(4.40–5.00) | 1.26E-16<br>(1.00E-16–3.17E-15) | 0.79<br>(0.71–1.05) | -45.67   |
| RDa15            | 0.45<br>(0.44–0.45) | 5.62E-08<br>(5.58E-08–6.20E-08) | 4523<br>( 4513– 4576)  | 9.31E-01<br>(8.82E-01–9.31E-01) | N/A                             | 7.46E-04<br>(7.12E-04–8.37E-04) | 1.00<br>(1.00–1.00) | 7.78E+00<br>(6.69E+00–8.25E+00) | 0.57<br>(0.56–0.61) | -34.63   |
| RFa15            | 0.55<br>(0.37–0.55) | 9.82E-08<br>(6.44E-08–1.58E-07) | 4906<br>( 4596– 5375)  | 4.08E-01<br>(2.25E-01–6.71E-01) | N/A                             | 1.00E-03<br>(7.33E-04–1.00E-03) | 1.00<br>(1.00–1.00) | 4.00E+01<br>(2.18E+01–4.00E+01) | 0.46<br>(0.40–0.78) | -25.73   |
| RLn12            | 0.38<br>(0.37–0.42) | 7.71E-08<br>(5.66E-08–1.00E-07) | 4710<br>( 4312– 4853)  | 2.52E-01<br>(2.19E-01–3.39E-01) | N/A                             | 9.99E-04<br>(7.36E-04–1.00E-03) | 4.05<br>(1.26–4.27) | 4.00E+01<br>(1.59E+01–4.00E+01) | 0.33<br>(0.30–0.38) | -11.35   |
| RIId14           | 0.29<br>(0.17–0.55) | 5.86E-08<br>(4.26E-08–1.82E-07) | 7612<br>( 4000– 7869)  | 2.92E-01<br>(6.28E-02–7.21E-01) | N/A                             | 2.21E-05<br>(1.64E-05–1.00E-03) | 4.98<br>(1.00–5.00) | 3.81E+01<br>(1.67E+00–4.00E+01) | 1.27<br>(1.19–1.78) | -70.29   |
| ROo13            | 0.25<br>(0.25–0.26) | 4.70E-08<br>(3.79E-08–7.44E-08) | 7317<br>( 7148– 7453)  | 5.73E-01<br>(3.83E-01–5.73E-01) | N/A                             | 4.33E-04<br>(3.09E-04–5.20E-04) | 2.54<br>(1.00–2.54) | 2.58E+00<br>(2.48E+00–4.02E+00) | 1.02<br>(1.01–1.19) | -59.53   |
| RSd14            | 0.55<br>(0.52–0.55) | 5.20E-08<br>(4.08E-08–9.38E-08) | 5707<br>( 5446– 5923)  | 2.79E-01<br>(1.69E-01–4.17E-01) | N/A                             | 2.05E-05<br>(1.53E-05–2.63E-05) | 1.00<br>(1.00–1.00) | 3.97E+01<br>(3.11E+01–4.00E+01) | 0.85<br>(0.77–1.09) | -48.84   |
| ROv14            | 0.50<br>(0.19–0.55) | 5.89E-08<br>(3.39E-08–9.73E-08) | 5916<br>( 5824– 6396)  | 2.84E-01<br>(1.79E-01–3.23E-01) | N/A                             | 3.86E-04<br>(2.53E-04–1.00E-03) | 1.00<br>(1.00–1.00) | 2.85E+00<br>(1.20E+00–5.18E+00) | 1.05<br>(0.79–1.48) | -58.78   |
