# Supplementary material for: Mechanistic basis of post-treatment control of SIV after anti-α4β7 antibody therapy
Source: PubMed Central journal article supplement (PMC8189501; doi:10.1371/journal.pcbi.1009031), 2021-06-09
Supplement: pcbi.1009031.s022.pdf [file pcbi.1009031.s022.pdf]

**S19 Table:** The estimate parameters for the seven IgG control macaques for the three different effector cell source models. The intervals specify the range of the set of intervals to approximate the 95% confidence intervals (S1 and S3 Text).

| Baseline source  |             |                     |               |                     |                     |             |          |
|------------------|-------------|---------------------|---------------|---------------------|---------------------|-------------|----------|
| Macaque          | $r_T$       | $m$                 | $p$           | $K_B$               | $K_P$               | $\sigma$    | $\ln(L)$ |
|                  | 0.12        | 1.00E-08            | 6728          | 5.51E-02            |                     | 0.70        |          |
| RBe14            | (0.09–0.24) | (1.00E-08–1.16E-06) | ( 5927– 8006) | (1.00E-03–4.39E-01) | N/A                 | (0.48–1.21) | -26.56   |
|                  | 0.24        | 3.53E-07            | 6953          | 1.79E-01            |                     | 0.35        |          |
| RIt11            | (0.19–0.24) | (1.41E-07–4.36E-07) | ( 6609– 7108) | (9.55E-02–1.98E-01) | N/A                 | (0.34–0.50) | -9.43    |
|                  | 0.20        | 6.13E-07            | 7352          | 1.23E-01            |                     | 0.45        |          |
| RKs13            | (0.20–0.21) | (6.13E-07–6.43E-07) | ( 7352– 7396) | (1.23E-01–1.36E-01) | N/A                 | (0.44–0.67) | -14.11   |
|                  | 0.19        | 9.11E-07            | 7704          | 1.36E-01            |                     | 0.29        |          |
| RSy13            | (0.17–0.19) | (6.09E-07–9.11E-07) | ( 7354– 7704) | (9.91E-02–1.40E-01) | N/A                 | (0.27–0.44) | -4.19    |
|                  | 0.24        | 1.06E-06            | 7833          | 1.13E-01            |                     | 0.33        |          |
| RYy13            | (0.19–0.27) | (1.00E-08–1.07E-06) | ( 7074– 8208) | (7.82E-02–6.00E-01) | N/A                 | (0.32–0.52) | -5.67    |
|                  | 0.22        | 1.00E-08            | 8598          | 1.74E-02            |                     | 0.90        |          |
| RLo14            | (0.17–0.45) | (1.00E-08–2.28E-06) | ( 6481–13074) | (1.00E-03–1.15E-01) | N/A                 | (0.64–1.49) | -40.96   |
|                  | 0.55        | 3.95E-06            | 9436          | 7.75E-02            |                     | 0.54        |          |
| RUs14            | (0.33–0.55) | (2.33E-06–1.29E-05) | ( 9018–11843) | (3.39E-02–2.34E-01) | N/A                 | (0.54–0.81) | -20.31   |
| Saturated source |             |                     |               |                     |                     |             |          |
| Macaque          | $r_T$       | $m$                 | $p$           | $K_B$               | $K_P$               | $\sigma$    | $\ln(L)$ |
|                  | 0.12        | 1.00E-08            | 6720          | 6.82E-02            | 1.00E-01            | 0.69        |          |
| RBe14            | (0.09–0.46) | (1.00E-08–4.23E-05) | ( 5828– 8688) | (1.00E-03–5.00E-01) | (1.00E-05–1.00E-01) | (0.46–1.26) | -26.48   |
|                  | 0.22        | 3.15E-07            | 6923          | 2.96E-01            | 6.36E-05            | 0.48        |          |
| RIt11            | (0.14–0.42) | (1.00E-08–1.97E-05) | ( 6146– 7481) | (1.26E-03–5.94E-01) | (1.00E-05–1.00E-01) | (0.37–0.67) | -12.36   |
|                  | 0.25        | 1.06E-06            | 7351          | 2.70E-01            | 1.91E-02            | 0.56        |          |
| RKs13            | (0.17–0.54) | (1.00E-08–3.13E-05) | ( 6228– 8870) | (4.39E-03–6.05E-01) | (1.00E-05–1.00E-01) | (0.53–0.98) | -19.28   |
|                  | 0.19        | 3.59E-06            | 7860          | 1.09E-01            | 4.56E-02            | 0.30        |          |
| RSy13            | (0.19–0.26) | (5.22E-07–4.94E-06) | ( 7201– 8006) | (8.52E-02–2.40E-01) | (1.23E-05–5.39E-02) | (0.29–0.52) | -4.65    |
|                  | 0.25        | 1.10E-06            | 7655          | 2.48E-01            | 1.92E-03            | 0.32        |          |
| RYy13            | (0.19–0.30) | (1.00E-08–2.04E-06) | ( 7058– 8119) | (7.25E-02–5.47E-01) | (1.00E-05–1.00E-01) | (0.30–0.51) | -4.93    |
|                  | 0.22        | 1.00E-08            | 8594          | 1.90E-02            | 1.15E-05            | 0.90        |          |
| RLo14            | (0.17–0.48) | (1.00E-08–4.41E-06) | ( 6179–13406) | (1.00E-03–2.17E-01) | (1.00E-05–1.00E-01) | (0.60–1.53) | -40.94   |
|                  | 0.47        | 4.52E-06            | 9432          | 2.27E-01            | 2.15E-04            | 0.58        |          |
| RUs14            | (0.24–0.55) | (2.94E-08–3.61E-05) | ( 8386–11592) | (2.88E-03–4.55E-01) | (1.00E-05–1.00E-01) | (0.54–0.92) | -21.81   |
| APC source       |             |                     |               |                     |                     |             |          |
| Macaque          | $r_T$       | $m$                 | $p$           | $K_B$               | $K_P$               | $\sigma$    | $\ln(L)$ |
|                  | 0.09        | 1.11E-07            | 4942          | 1.67E-01            |                     | 0.63        |          |
| RBe14            | (0.09–0.55) | (4.68E-08–4.81E-07) | ( 4000– 6194) | (1.40E-02–6.51E-01) | N/A                 | (0.46–1.08) | -23.77   |
|                  | 0.55        | 6.05E-08            | 4743          | 2.59E-01            |                     | 0.38        |          |
| RIt11            | (0.09–0.55) | (2.75E-08–1.44E-07) | ( 4261– 5556) | (7.61E-02–8.57E-01) | N/A                 | (0.27–0.66) | -11.40   |
|                  | 0.53        | 5.08E-08            | 5135          | 3.22E-01            |                     | 0.63        |          |
| RKs13            | (0.13–0.55) | (2.38E-08–1.35E-07) | ( 4000– 6637) | (6.88E-02–9.55E-01) | N/A                 | (0.43–1.05) | -23.90   |
|                  | 0.23        | 6.07E-08            | 5350          | 3.03E-01            |                     | 0.32        |          |
| RSy13            | (0.17–0.55) | (3.72E-08–1.35E-07) | ( 4705– 5956) | (8.34E-02–7.24E-01) | N/A                 | (0.23–0.57) | -8.24    |
|                  | 0.41        | 3.56E-08            | 5216          | 5.60E-01            |                     | 0.40        |          |
| RYy13            | (0.17–0.55) | (2.57E-08–6.97E-08) | ( 4535– 5986) | (1.95E-01–7.94E-01) | N/A                 | (0.29–0.67) | -10.41   |
|                  | 0.10        | 9.38E-08            | 7978          | 1.07E-01            |                     | 0.60        |          |
| RLo14            | (0.09–0.55) | (3.79E-08–2.48E-07) | ( 5415– 9786) | (1.97E-02–2.90E-01) | N/A                 | (0.46–0.94) | -25.87   |
|                  | 0.28        | 1.87E-07            | 14977         | 3.97E-02            |                     | 0.51        |          |
| RUs14            | (0.28–0.55) | (3.61E-08–1.87E-07) | ( 6146–15000) | (3.78E-02–6.00E-01) | N/A                 | (0.49–0.76) | -20.16   |
