# Supplementary material for: Mechanistic basis of post-treatment control of SIV after anti-α4β7 antibody therapy
Source: PubMed Central journal article supplement (PMC8189501; doi:10.1371/journal.pcbi.1009031), 2021-06-09

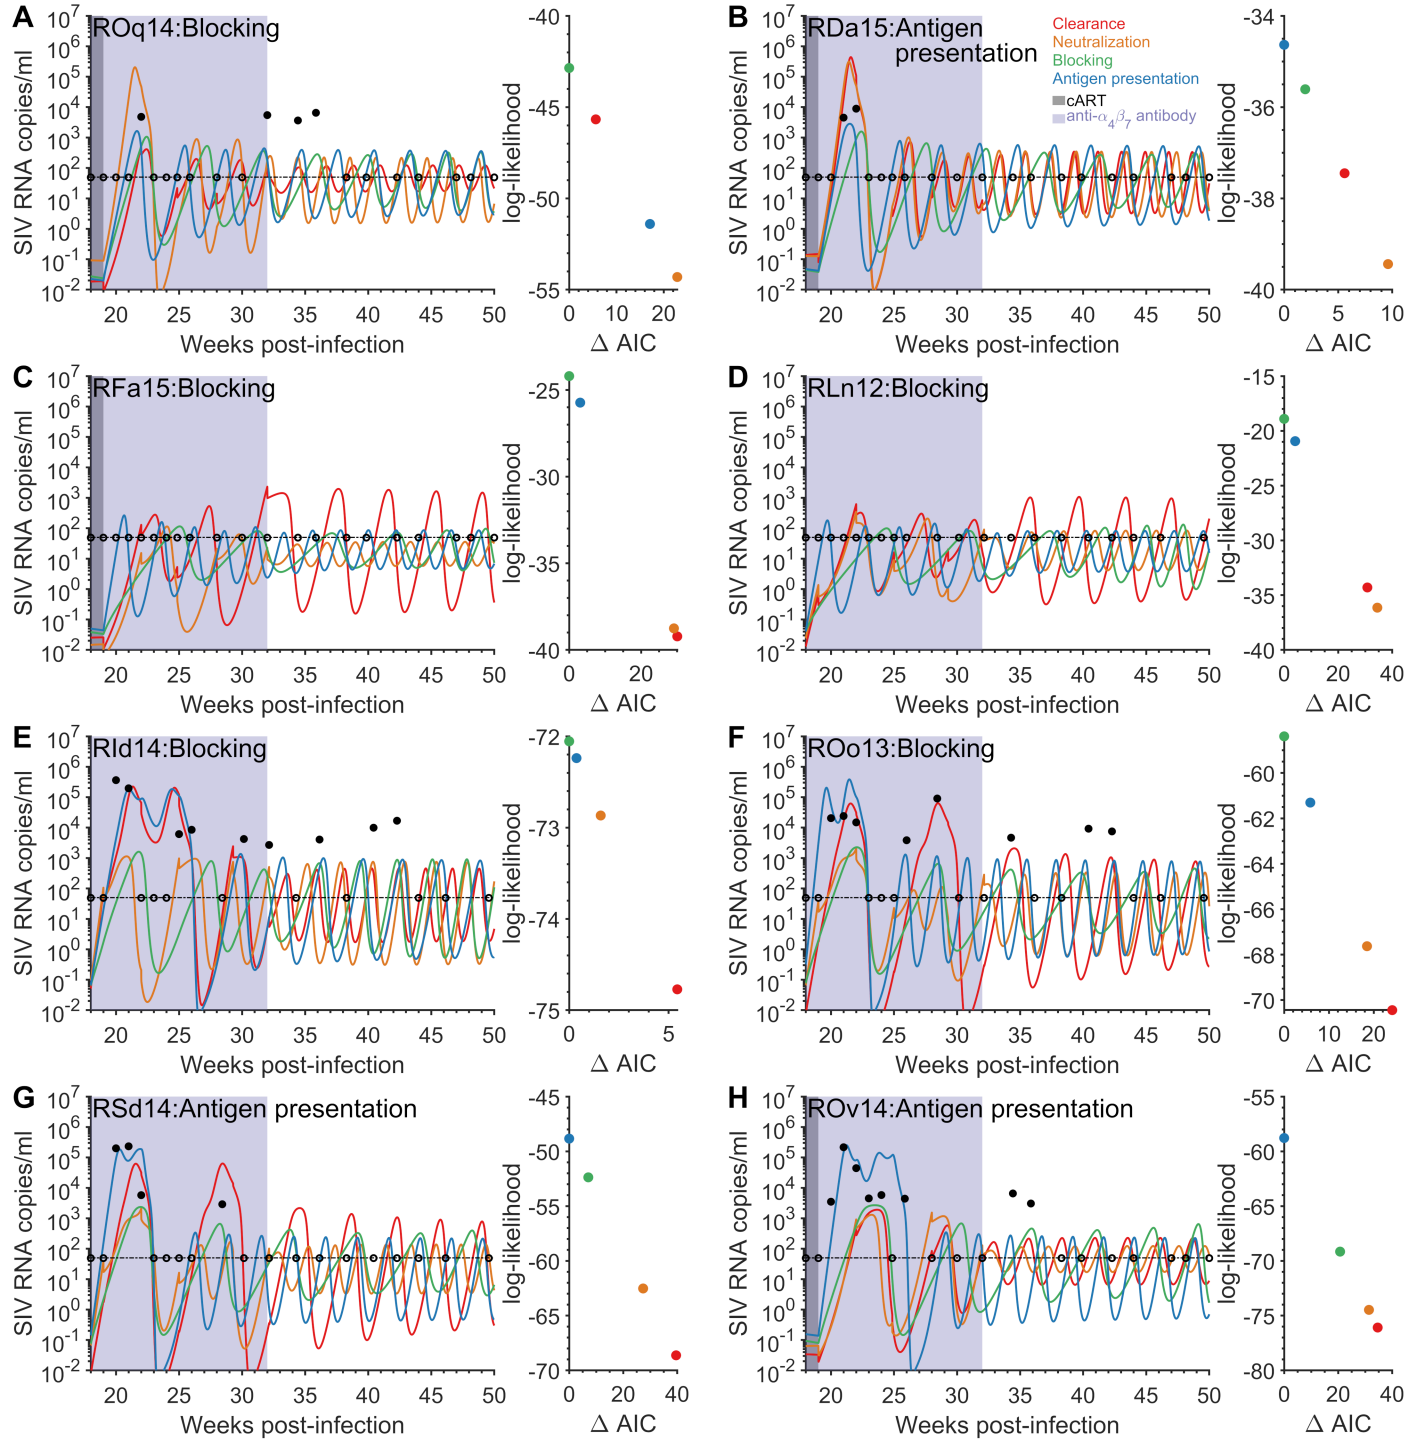

Supplement: pcbi.1009031.s027.pdf [file pcbi.1009031.s027.pdf]
